# Supplementary material
Source: publisher figshare collection journal article supplement (https://sage.figshare.com/ndownloader/files/17947775)
Supplement: Supplementary file 1 [file 17947775]

congress,time,ICPSR_ID,name,state_name,ICPSR_state,district,party,FP_position,DW_NOM1,HASC,HFAC,female,veteran,GOP_prez_share
93,1,226,"ARENDS, Leslie Cornelius",IL,21,15,200,0.819673618,0.301,1,0,0,1,66
93,1,267,"ASHLEY, Thomas William Ludlow",OH,24,9,100,-1.176662992,-0.35,0,0,0,1,49
93,1,465,"BARRETT, William Aloysius",PA,14,1,100,-1.150784028,-0.469,0,0,0,0,42
93,1,633,"BENNETT, Charles Edward",FL,43,3,100,0.328807485,-0.088,1,0,0,1,70
93,1,789,"BLATNIK, John Anton",MN,33,8,100,-1.30544031,-0.48,0,0,0,1,45
93,1,830,"BOLAND, Edward Patrick",MA,3,2,100,-1.11114345,-0.306,0,0,0,1,48
93,1,835,"BOLLING, Richard Walker",MO,34,5,100,-1.008843998,-0.504,0,0,0,1,69
93,1,948,"BRADEMAS, John",IN,22,3,100,-1.70997442,-0.462,0,0,0,1,64
93,1,986,"BRAY, William Gilmer",IN,22,6,200,1.514981099,0.235,1,0,0,1,74
93,1,1077,"BROOKS, Jack Bascom",TX,49,9,100,-0.085141717,-0.407,0,0,0,1,60
93,1,1087,"BROOMFIELD, William S.",MI,23,19,200,0.122871094,0.227,0,1,0,0,68
93,1,1154,"BROYHILL, Joel Thomas",VA,40,10,200,1.198120894,0.159,0,0,0,1,64
93,1,1265,"BURKE, James Anthony",MA,3,11,100,-0.95049132,-0.4,0,0,0,1,43
93,1,1282,"BURLESON, Omar Truman",TX,49,17,100,2.31530351,0.002,0,0,0,1,73
93,1,1577,"CASEY, Robert Randolph",TX,49,22,100,1.217263618,-0.098,0,0,0,0,64
93,1,1610,"CEDERBERG, Elford Albin",MI,23,10,200,0.589502431,0.27,0,0,0,1,64
93,1,1620,"CHAMBERLAIN, Charles Ernest",MI,23,6,200,0.540417269,0.247,0,0,0,1,59
93,1,1763,"CLARK, Frank Monroe",PA,14,25,100,-0.244006837,-0.292,0,0,0,1,60
93,1,1941,"COLLIER, Harold Reginald",IL,21,6,200,1.247655663,0.378,0,0,0,0,69
93,1,2009,"CONTE, Silvio Ottavio",MA,3,1,200,-1.103057238,-0.023,0,0,0,1,49
93,1,2329,"DANIELS, Dominick Vincent",NJ,12,14,100,-0.830200328,-0.386,0,0,0,0,60
93,1,2383,"DAVIS, Glenn Robert",WI,25,9,200,0.764717864,0.433,0,0,0,1,63
93,1,2476,"DELANEY, James Joseph",NY,13,9,100,-0.285769248,-0.303,0,0,0,0,73
93,1,2513,"DENT, John Herman",PA,14,21,100,0.021817063,-0.384,0,0,0,1,58
93,1,2525,"DERWINSKI, Edward Joseph",IL,21,4,200,0.827177974,0.342,0,1,0,1,71
93,1,2533,"DEVINE, Samuel Leeper",OH,24,12,200,2.998177445,0.502,0,0,0,0,68
93,1,2594,"DIGGS, Charles Coles, Jr.",MI,23,13,100,-1.939309073,-0.539,0,1,0,1,16
93,1,2605,"DINGELL, John David, Jr.",MI,23,16,100,-0.773857177,-0.448,0,0,0,1,54
93,1,2660,"DONOHUE, Harold Daniel",MA,3,3,100,-0.825831241,-0.296,0,0,0,1,46
93,1,2672,"DORN, William Jennings Bryan",SC,48,3,100,1.789208836,-0.017,0,0,0,1,77
93,1,2706,"DOWNING, Thomas Nelms",VA,40,1,100,0.824227612,-0.065,0,0,0,1,69
93,1,2752,"DULSKI, Thaddeus Joseph",NY,13,37,100,-0.353313413,-0.25,0,0,0,1,43
93,1,3034,"EVINS, Joseph Landon",TN,54,4,100,-0.063908984,-0.343,0,0,0,1,65
93,1,3078,"FASCELL, Dante Bruno",FL,43,15,100,-1.192793514,-0.4,0,1,0,1,63
93,1,3171,"FISHER, Ovie Clark",TX,49,21,100,1.429409741,0.038,1,0,0,0,76
93,1,3224,"FLOOD, Daniel John",PA,14,11,100,0.230383632,-0.377,0,0,0,0,62
93,1,3242,"FLYNT, John James, Jr.",GA,44,6,100,0.651157632,0,0,0,0,1,80
93,1,3268,"FORD, Gerald Rudolph, Jr.",MI,23,5,200,0.668486584,0.281,0,0,0,1,61
93,1,3268,"FORD, Gerald Rudolph, Jr.",MI,23,5,200,0.668486584,0.281,0,0,0,1,61
93,1,3321,"FOUNTAIN, Lawrence H.",NC,47,2,100,0.592160207,-0.041,0,1,0,1,64
93,1,3364,"FRELINGHUYSEN, Peter Hood Ballantine, Jr.",NJ,12,5,200,0.384953457,0.172,0,1,0,1,66
93,1,3553,"GIAIMO, Robert Nicholas",CT,1,3,100,-0.983023116,-0.318,0,0,0,1,62
93,1,3769,"GRAY, Kenneth James",IL,21,24,100,-0.566216677,-0.364,0,0,0,1,60
93,1,3775,"GREEN, Edith Starrett",OR,72,3,100,-0.075941489,-0.243,0,0,1,0,48
93,1,3830,"GRIFFITHS, Martha Wright",MI,23,17,100,-0.885040554,-0.344,0,0,1,0,60
93,1,3853,"GROSS, Harold Royce",IA,31,3,200,0.562302177,0.955,0,1,0,1,60
93,1,3867,"GUBSER, Charles Samuel",CA,71,10,200,0.731031664,0.205,1,0,0,0,61
93,1,3929,"HALEY, James Andrew",FL,43,8,100,1.209256227,0.098,0,0,0,1,79
93,1,4043,"HANSEN, Julia Butler",WA,73,3,100,-0.390963879,-0.394,0,0,1,0,58
93,1,4247,"HAYS, Wayne Levere",OH,24,18,100,0.442898273,-0.304,0,1,0,1,61
93,1,4275,"H��BERT, Felix Edward",LA,45,1,100,1.039761501,-0.079,1,0,0,0,70
93,1,4276,"HECHLER, Kenneth William",WV,56,4,100,-1.327531805,-0.31,0,0,0,1,63
93,1,4514,"HOLIFIELD, Chester Earl",CA,71,19,100,-0.372660492,-0.467,0,0,0,0,59
93,1,4592,"HOSMER, Craig",CA,71,32,200,0.677517279,0.276,0,0,0,1,67
93,1,4891,"JARMAN, John",OK,53,5,100,1.407002002,-0.017,0,0,0,1,76
93,1,4957,"JOHNSON, Harold Terry",CA,71,2,100,-0.465836404,-0.439,0,0,0,0,55
93,1,5058,"JONES, Robert Emmett, Jr.",AL,41,5,100,0.416272958,-0.358,0,0,0,1,75
93,1,5098,"KARTH, Joseph Edward",MN,33,4,100,-1.041103235,-0.386,0,0,0,1,47
93,1,5101,"KASTENMEIER, Robert William",WI,25,2,100,-1.964831031,-0.514,0,0,0,1,49
93,1,5326,"KLUCZYNSKI, John Carl",IL,21,5,100,-0.402631927,-0.382,0,0,0,1,47
93,1,5436,"LANDRUM, Phillip Mitchell",GA,44,9,100,0.52258184,-0.134,0,0,0,1,82
93,1,5495,"LATTA, Delbert Leroy",OH,24,5,200,1.055797616,0.391,0,0,0,0,66
93,1,5873,"MACDONALD, Torbert Hart",MA,3,7,100,-0.867691785,-0.308,0,0,0,1,43
93,1,5900,"MADDEN, Ray John",IN,22,1,100,-0.946489435,-0.422,0,0,0,1,53
93,1,5924,"MAHON, George Herman",TX,49,19,100,0.777144932,-0.168,0,0,0,0,76
93,1,5929,"MAILLIARD, William Somers",CA,71,6,200,0.449007222,0.117,0,1,0,1,52
93,1,5929,"MAILLIARD, William Somers",CA,71,6,200,0.449007222,0.117,0,1,0,1,52
93,1,6240,"McFALL, John Joseph",CA,71,15,100,0.27482326,-0.468,0,0,0,1,56
93,1,6455,"MICHEL, Robert Henry",IL,21,18,200,0.910861709,0.372,0,0,0,1,66
93,1,6532,"MILLS, Wilbur Daigh",AR,42,2,100,0.190565871,-0.237,0,0,0,0,64
93,1,6548,"MINSHALL, William Edwin, Jr.",OH,24,23,200,1.004327283,0.312,0,0,0,1,65
93,1,6584,"MOLLOHAN, Robert Homer",WV,56,1,100,0.442346071,-0.349,1,0,0,0,64
93,1,6661,"MOORHEAD, William Singer",PA,14,14,100,-1.233494537,-0.416,0,0,0,1,48
93,1,6685,"MORGAN, Thomas Ellsworth",PA,14,22,100,-0.580858973,-0.396,0,1,0,0,57
93,1,6756,"MOSS, John Emerson",CA,71,3,100,-1.144555656,-0.582,0,0,0,1,49
93,1,6845,"NATCHER, William Huston",KY,51,2,100,-0.153101828,-0.288,0,0,0,1,65
93,1,6860,"NELSEN, Ancher",MN,33,2,200,0.489543626,0.268,0,0,0,0,59
93,1,6936,"NIX, Robert Nelson Cornelius, Sr.",PA,14,2,100,-1.305033119,-0.536,0,1,0,0,25
93,1,7043,"O'HARA, James Grant",MI,23,12,100,-1.033608308,-0.45,0,0,0,1,65
93,1,7081,"O'NEILL, Thomas Philip, Jr. (Tip)",MA,3,8,100,-0.842893102,-0.402,0,0,0,0,34
93,1,7228,"PASSMAN, Otto Ernest",LA,45,5,100,1.144967786,-0.056,0,0,0,1,73
93,1,7232,"PATMAN, John William Wright",TX,49,1,100,0.019604071,-0.396,0,0,0,1,70
93,1,7333,"PEPPER, Claude Denson",FL,43,14,100,-0.400169491,-0.422,0,0,0,0,58
93,1,7343,"PERKINS, Carl Dewey",KY,51,7,100,-0.278415402,-0.343,0,0,0,1,58
93,1,7498,"POAGE, William Robert",TX,49,11,100,1.801141262,-0.082,0,0,0,1,69
93,1,7610,"PRICE, Charles Melvin",IL,21,23,100,-0.332928927,-0.429,1,0,0,1,53
93,1,7671,"QUIE, Albert Harold",MN,33,1,200,-0.156142478,0.189,0,0,0,1,60
93,1,7717,"RANDALL, William Joseph",MO,34,4,100,0.327606158,-0.184,1,0,0,1,69
93,1,7824,"REUSS, Henry Schoellkopf",WI,25,5,100,-1.769380796,-0.481,0,0,0,1,42
93,1,7845,"RHODES, John Jacob",AZ,61,1,200,0.514730993,0.225,0,0,0,1,68
93,1,7995,"ROBISON, Howard Winfield",NY,13,27,200,-0.518432583,0.263,0,0,0,1,64
93,1,8010,"RODINO, Peter Wallace, Jr.",NJ,12,10,100,-1.520965141,-0.435,0,0,0,1,37
93,1,8032,"ROGERS, Paul Grant",FL,43,11,100,0.195270592,-0.085,0,0,0,1,74
93,1,8049,"ROONEY, John James",NY,13,14,100,-0.166445802,-0.384,0,0,0,0,48
93,1,8080,"ROSTENKOWSKI, Daniel David",IL,21,8,100,-0.556965431,-0.39,0,0,0,1,44
93,1,8084,"ROUSH, John Edward",IN,22,4,100,-0.412773823,-0.233,0,0,0,1,67
93,1,8247,"SAYLOR, John Phillips",PA,14,12,200,1.383622759,0.133,0,0,0,1,64
93,1,8247,"SAYLOR, John Phillips",PA,14,12,200,1.383622759,0.133,0,0,0,1,64
93,1,8247,"SAYLOR, John Phillips",PA,14,12,200,1.383622759,0.133,0,0,0,1,64
93,1,8247,"SAYLOR, John Phillips",PA,14,12,200,1.383622759,0.133,0,0,0,1,64
93,1,8268,"SCHNEEBELI, Herman Theodore",PA,14,17,200,-0.123802655,0.389,0,0,0,1,71
93,1,8474,"SHIPLEY, George Edward",IL,21,22,100,0.051590679,-0.284,0,0,0,1,64
93,1,8507,"SIKES, Robert Lee Fulton",FL,43,1,100,1.268559546,-0.128,0,0,0,1,84
93,1,8549,"SISK, Bernice Frederic",CA,71,16,100,-0.239187377,-0.388,0,0,0,0,52
93,1,8564,"SLACK, John Mark, Jr.",WV,56,3,100,0.44308014,-0.281,0,0,0,0,62
93,1,8672,"SMITH, Neal Edward",IA,31,4,100,-0.671517561,-0.313,0,0,0,1,56
93,1,8824,"STAGGERS, Harley Orrin",WV,56,2,100,0.125060208,-0.345,0,0,0,1,65
93,1,8866,"STEED, Thomas Jefferson",OK,53,4,100,0.940053547,-0.279,0,0,0,1,74
93,1,9017,"STRATTON, Samuel Studdiford",NY,13,28,100,0.508091414,-0.139,1,0,0,1,57
93,1,9056,"STUBBLEFIELD, Frank Albert",KY,51,1,100,0.987531378,-0.247,0,0,0,1,63
93,1,9072,"SULLIVAN, Leonor Kretzer",MO,34,3,100,-0.602817411,-0.386,0,0,1,0,58
93,1,9230,"TAYLOR, Roy Arthur",NC,47,11,100,0.549989831,-0.069,0,1,0,1,71
93,1,9240,"TEAGUE, Charles McKevett",CA,71,13,200,0.419253128,0.243,0,0,0,1,64
93,1,9240,"TEAGUE, Charles McKevett",CA,71,13,200,0.419253128,0.243,0,0,0,1,64
93,1,9241,"TEAGUE, Olin Earl",TX,49,6,100,0.888970996,-0.102,0,0,0,1,71
93,1,9322,"THOMPSON, Frank, Jr.",NJ,12,4,100,-1.773630479,-0.511,0,0,0,1,58
93,1,9551,"ULLMAN, Albert Conrad",OR,72,2,100,-0.692270877,-0.367,0,0,0,1,60
93,1,9623,"VANIK, Charles Albert",OH,24,22,100,-1.768146978,-0.366,0,0,0,1,57
93,1,9802,"WAMPLER, William Creed",VA,40,9,200,1.08295099,0.146,0,0,0,1,68
93,1,10075,"WHITTEN, Jamie Lloyd",MS,46,1,100,1.322909937,-0.161,0,0,0,0,80
93,1,10091,"WIDNALL, William Beck",NJ,12,7,200,-0.087951105,0.125,0,0,0,0,66
93,1,10249,"WILSON, Robert Carlton (Bob)",CA,71,40,200,0.69161352,0.264,1,0,0,1,64
93,1,10391,"WRIGHT, James Claude, Jr.",TX,49,12,100,0.34526428,-0.383,0,0,0,1,62
93,1,10421,"YATES, Sidney Richard",IL,21,9,100,-1.769989212,-0.494,0,0,0,1,42
93,1,10446,"YOUNG, John Andrew",TX,49,14,100,0.588072699,-0.342,0,0,0,0,60
93,1,10463,"ZABLOCKI, Clement John",WI,25,4,100,0.015318967,-0.355,0,1,0,0,49
93,1,10500,"ADDABBO, Joseph Patrick",NY,13,7,100,-1.428833861,-0.402,0,0,0,0,41
93,1,10501,"ANDERSON, John Bayard",IL,21,16,200,-0.220190725,0.183,0,0,0,1,66
93,1,10502,"ASHBROOK, John Milan",OH,24,17,200,1.282933815,0.612,0,0,0,1,69
93,1,10505,"BELL, Alphonzo",CA,71,28,200,0.742440389,0.183,0,0,0,1,56
93,1,10508,"CAREY, Hugh Leo",NY,13,15,100,-1.387449257,-0.351,0,0,0,1,68
93,1,10510,"CLANCY, Donald Daniel",OH,24,2,200,1.795875941,0.403,0,0,0,0,67
93,1,10511,"CORMAN, James Charles",CA,71,22,100,-1.464767718,-0.53,0,0,0,1,56
93,1,10512,"DAVIS, John William",GA,44,7,100,0.707364523,-0.195,0,1,0,1,83
93,1,10517,"FINDLEY, Paul",IL,21,20,200,-0.760409117,0.246,0,1,0,1,64
93,1,10520,"GONŹLEZ, Henry B.",TX,49,20,100,-0.237253169,-0.538,0,0,0,0,39
93,1,10521,"GOODLING, George Atlee",PA,14,19,200,2.206797546,0.455,0,0,0,0,72
93,1,10525,"HARSHA, William Howard",OH,24,6,200,1.302523775,0.188,0,0,0,1,70
93,1,10526,"HARVEY, James",MI,23,8,200,0.212751132,0.2,0,0,0,1,64
93,1,10526,"HARVEY, James",MI,23,8,200,0.212751132,0.2,0,0,0,1,64
93,1,10527,"HENDERSON, David Newton",NC,47,3,100,0.595991412,-0.108,0,0,0,1,74
93,1,10528,"ICHORD, Richard Howard, II",MO,34,8,100,2.295625584,0.001,1,0,0,0,68
93,1,10530,"KING, Carleton James",NY,13,29,200,1.824110561,0.322,1,0,0,0,70
93,1,10534,"MARTIN, David Thomas",NE,35,3,200,1.329529441,0.33,0,0,0,0,76
93,1,10539,"MOSHER, Charles Adams",OH,24,13,200,-1.234036495,0.177,0,0,0,0,59
93,1,10540,"NEDZI, Lucien Norbert",MI,23,14,100,-1.507895507,-0.427,1,0,0,1,60
93,1,10545,"PIKE, Otis Grey",NY,13,1,100,-0.574918455,-0.162,1,0,0,1,70
93,1,10550,"ROBERTS, Herbert Ray",TX,49,4,100,1.395728966,-0.131,0,0,0,1,74
93,1,10551,"ROSENTHAL, Benjamin Stanley",NY,13,8,100,-2.606886274,-0.562,0,1,0,1,50
93,1,10553,"ROUSSELOT, John Harbin",CA,71,24,200,2.269012793,0.601,0,0,0,0,73
93,1,10559,"SHRIVER, Garner E.",KS,32,4,200,0.597684385,0.175,0,0,0,1,68
93,1,10561,"ST. GERMAIN, Fernand Joseph",RI,5,1,100,-1.436704366,-0.355,0,0,0,1,52
93,1,10563,"STEPHENS, Robert Grier, Jr.",GA,44,10,100,0.715184673,-0.194,0,0,0,1,73
93,1,10564,"THOMSON, Vernon Wallace",WI,25,3,200,0.550372529,0.233,0,1,0,0,59
93,1,10566,"UDALL, Morris King",AZ,61,2,100,-1.050983102,-0.387,0,0,0,1,57
93,1,10567,"WAGGONNER, Joseph David, Jr.",LA,45,4,100,1.88011947,0.015,0,0,0,1,75
93,1,10569,"ANDREWS, Mark",ND,36,1,200,0.291736112,0.087,0,0,0,1,63
93,1,10572,"BROTZMAN, Donald Glenn",CO,62,2,200,-0.124998421,0.157,0,0,0,1,65
93,1,10573,"BROWN, George Edward, Jr.",CA,71,38,100,-1.445632468,-0.506,0,0,0,1,52
93,1,10574,"BROYHILL, James Thomas",NC,47,10,200,0.696620366,0.269,0,0,0,0,73
93,1,10577,"BURTON, Phillip",CA,71,5,100,-2.688819069,-0.634,0,0,0,1,36
93,1,10579,"CLAUSEN, Donald Holst",CA,71,1,200,0.816101321,0.16,0,0,0,1,56
93,1,10580,"CLAWSON, Delwin Morgan",CA,71,23,200,1.84160095,0.483,0,0,0,0,70
93,1,10581,"CLEVELAND, James Colgate",NH,4,2,200,0.568700138,0.218,0,0,0,1,62
93,1,10583,"EDWARDS, William Donlon (Don)",CA,71,9,100,-3.167503917,-0.599,0,0,0,1,48
93,1,10585,"FRASER, Donald MacKay",MN,33,5,100,-2.396248904,-0.469,0,1,0,1,44
93,1,10586,"FULTON, Richard Harmon",TN,54,5,100,-0.634757733,-0.332,0,0,0,1,63
93,1,10587,"FUQUA, Don",FL,43,2,100,0.648646991,-0.173,0,0,0,1,69
93,1,10588,"GIBBONS, Sam Melville",FL,43,7,100,-0.538617622,-0.233,0,0,0,1,70
93,1,10591,"GREEN, William Joseph",PA,14,3,100,-2.467451714,-0.415,0,0,0,0,46
93,1,10592,"GROVER, James Russell, Jr.",NY,13,2,200,0.555581677,0.25,0,0,0,1,72
93,1,10594,"HANNA, Richard Thomas",CA,71,34,100,-1.282186812,-0.347,0,0,0,1,66
93,1,10595,"HAWKINS, Augustus Freeman (Gus)",CA,71,21,100,-1.893217595,-0.517,0,0,0,0,26
93,1,10596,"HORTON, Frank Jefferson",NY,13,34,200,0.093670267,-0.004,0,0,0,1,63
93,1,10597,"HUTCHINSON, J. Edward",MI,23,4,200,1.607622902,0.444,0,0,0,1,68
93,1,10598,"JOHNSON, Albert Walter",PA,14,23,200,0.4863911,0.197,0,0,0,0,66
93,1,10599,"LEGGETT, Robert Louis",CA,71,4,100,-1.283947913,-0.468,1,0,0,1,54
93,1,10601,"LONG, Clarence Dickinson",MD,52,2,100,-0.447124506,-0.274,0,0,0,1,68
93,1,10602,"LONG, Gillis William",LA,45,8,100,-0.274544141,-0.368,0,0,0,1,63
93,1,10605,"MATSUNAGA, Spark Masayuki",HI,82,1,100,-0.903893157,-0.379,0,0,0,1,62
93,1,10606,"McCLORY, Robert",IL,21,13,200,-0.083306841,0.256,0,0,0,1,70
93,1,10607,"McDADE, Joseph Michael",PA,14,10,200,-0.227735482,0.093,0,0,0,0,64
93,1,10609,"MINISH, Joseph George",NJ,12,11,100,-0.774249608,-0.299,0,0,0,1,60
93,1,10611,"MURPHY, John Michael",NY,13,17,100,0.043636779,-0.406,0,0,0,1,62
93,1,10613,"PATTEN, Edward James",NJ,12,15,100,-0.726146859,-0.424,0,0,0,0,61
93,1,10614,"PICKLE, James Jarrell (Jake)",TX,49,10,100,-0.036683486,-0.218,0,0,0,1,59
93,1,10616,"QUILLEN, James Henry",TN,54,1,200,1.462441428,0.246,0,0,0,1,78
93,1,10620,"ROONEY, Frederick Bernard",PA,14,15,100,-0.571175297,-0.35,0,0,0,1,60
93,1,10621,"ROYBAL, Edward R.",CA,71,30,100,-2.212535566,-0.61,0,0,0,1,48
93,1,10625,"SKUBITZ, Joe",KS,32,5,200,0.868010347,0.189,0,0,0,0,71
93,1,10626,"SNYDER, Marion Gene",KY,51,4,200,0.970458996,0.26,0,0,0,0,70
93,1,10631,"TALCOTT, Burt Lacklen",CA,71,12,200,0.718879104,0.25,0,0,0,1,56
93,1,10633,"VAN DEERLIN, Lionel",CA,71,41,100,-1.110811498,-0.401,0,0,0,1,57
93,1,10638,"WYDLER, John Waldemar",NY,13,5,200,0.315235191,0.277,0,0,0,1,63
93,1,10639,"WYMAN, Louis Crosby",NH,4,1,200,0.9502571,0.236,0,0,0,1,67
93,1,10640,"WILSON, Charles Herbert",CA,71,31,100,-0.337678614,-0.39,1,0,0,1,57
93,1,10700,"ADAMS, Brockman (Brock)",WA,73,7,100,-1.202043957,-0.396,0,0,0,1,56
93,1,10703,"ANNUNZIO, Frank",IL,21,11,100,-0.671471216,-0.398,0,0,0,0,63
93,1,10705,"BINGHAM, Jonathan Brewster",NY,13,22,100,-2.37483363,-0.509,0,1,0,1,40
93,1,10706,"BUCHANAN, John Hall, Jr.",AL,41,6,200,0.385189402,0.146,0,1,0,1,72
93,1,10710,"CARTER, Tim Lee",KY,51,5,200,1.009605031,0.08,0,0,0,1,73
93,1,10712,"CONABLE, Barber Benjamin, Jr.",NY,13,35,200,0.471979619,0.371,0,0,0,1,66
93,1,10713,"CONYERS, John, Jr.",MI,23,1,100,-2.258841153,-0.658,0,0,0,1,14
93,1,10715,"CULVER, John Chester",IA,31,2,100,-1.591036469,-0.41,0,1,0,1,56
93,1,10716,"de la GARZA, Eligio, II (Kika)",TX,49,15,100,0.464250298,-0.255,0,0,0,1,55
93,1,10717,"DICKINSON, William Louis",AL,41,2,200,2.290477574,0.398,1,0,0,1,78
93,1,10719,"DUNCAN, John James",TN,54,2,200,1.939391266,0.194,0,0,0,1,73
93,1,10721,"EDWARDS, William Jackson (Jack)",AL,41,1,200,0.650658564,0.177,0,0,0,1,76
93,1,10722,"ERLENBORN, John Neal",IL,21,14,200,0.363941966,0.315,0,0,0,1,75
93,1,10723,"EVANS, Frank Edward",CO,62,3,100,-1.159014428,-0.331,0,0,0,1,64
93,1,10726,"FOLEY, Thomas Stephen",WA,73,5,100,-0.966207038,-0.354,0,0,0,0,63
93,1,10727,"FORD, William David",MI,23,15,100,-1.420497181,-0.516,0,0,0,1,61
93,1,10728,"GETTYS, Thomas Smithwick",SC,48,5,100,0.896623167,-0.122,0,0,0,1,71
93,1,10732,"HAMILTON, Lee Herbert",IN,22,9,100,-0.873598093,-0.171,0,1,0,0,64
93,1,10733,"HANLEY, James Michael",NY,13,32,100,-0.558963177,-0.306,0,0,0,1,70
93,1,10737,"HELSTOSKI, Henry",NJ,12,9,100,-2.379346508,-0.484,0,0,0,1,66
93,1,10738,"HICKS, Floyd Verne",WA,73,6,100,-0.25245125,-0.414,1,0,0,1,60
93,1,10739,"HOWARD, James John",NJ,12,3,100,-1.531775015,-0.431,0,0,0,1,67
93,1,10740,"HUNGATE, William Leonard",MO,34,9,100,-0.622816641,-0.332,0,0,0,1,65
93,1,10749,"McEWEN, Robert Cameron",NY,13,30,200,0.984351584,0.234,0,0,0,1,67
93,1,10756,"MEEDS, Edwin Lloyd",WA,73,2,100,-1.217575356,-0.453,0,0,0,1,62
93,1,10757,"MINK, Patsy Takemoto",HI,82,2,100,-1.585027553,-0.513,0,0,1,0,63
93,1,10766,"RONCALIO, Teno",WY,68,1,100,-0.56114785,-0.457,0,0,0,1,69
93,1,10767,"SATTERFIELD, David Edward, III",VA,40,3,100,2.932097729,0.265,0,0,0,1,72
93,1,10771,"SMITH, Henry P., III",NY,13,36,200,0.37142034,0.23,0,0,0,0,60
93,1,10773,"STANTON, John William",OH,24,11,200,-0.418473971,0.135,0,0,0,1,62
93,1,10778,"VIGORITO, Joseph Phillip",PA,14,24,100,-0.701476208,-0.311,0,0,0,1,61
93,1,10783,"WHITE, Richard Crawford",TX,49,16,100,0.435564135,-0.137,1,0,0,1,64
93,1,10784,"WOLFF, Lester Lionel",NY,13,6,100,-0.789857463,-0.264,0,1,0,1,62
93,1,10785,"WYATT, Wendell",OR,72,1,200,0.095189299,0.103,0,0,0,1,57
93,1,10786,"BROWN, Clarence J., Jr.",OH,24,7,200,0.072244881,0.3,0,0,0,1,67
93,1,10788,"JONES, Walter Beaman, Sr.",NC,47,1,100,0.749130521,-0.259,0,0,0,0,70
93,1,10790,"REES, Thomas Mankell",CA,71,26,100,-2.222145068,-0.484,0,0,0,1,45
93,1,10793,"WALDIE, Jerome Russell",CA,71,14,100,-2.511010638,-0.505,0,0,0,1,55
93,1,10794,"VANDER JAGT, Guy Adrian",MI,23,9,200,0.185269766,0.247,0,1,0,0,67
93,1,11000,"BEVILL, Tom",AL,41,4,100,1.818834535,-0.213,0,0,0,1,78
93,1,11001,"BIESTER, Edward George, Jr.",PA,14,8,200,-0.832605487,0.035,0,1,0,0,65
93,1,11002,"BLACKBURN, Benjamin Bentley",GA,44,4,200,1.382378237,0.386,0,0,0,1,77
93,1,11004,"BRASCO, Frank James",NY,13,11,100,-1.21917102,-0.423,0,0,0,1,52
93,1,11005,"BRINKLEY, Jack Thomas",GA,44,3,100,1.161565315,-0.073,1,0,0,1,78
93,1,11006,"BROWN, Garry Eldridge",MI,23,3,200,0.76609097,0.302,0,0,0,1,62
93,1,11007,"BURKE, J. Herbert",FL,43,12,200,0.808784697,0.241,0,1,0,1,72
93,1,11011,"DELLENBACK, John Richard",OR,72,4,200,-0.812098059,0.282,0,0,0,1,56
93,1,11013,"ECKHARDT, Robert Christian",TX,49,8,100,-2.053211595,-0.547,0,0,0,1,54
93,1,11014,"EILBERG, Joshua",PA,14,4,100,-1.160932391,-0.443,0,0,0,1,56
93,1,11015,"ESCH, Marvin Leonel",MI,23,2,200,-0.74204783,0.134,0,0,0,1,56
93,1,11016,"ESHLEMAN, Edwin Duing",PA,14,16,200,0.460475749,0.276,0,0,0,1,76
93,1,11019,"GUDE, Gilbert",MD,52,8,200,-1.236756329,-0.028,0,0,0,1,57
93,1,11020,"HAMMERSCHMIDT, John Paul",AR,42,3,200,1.279804106,0.253,0,0,0,1,74
93,1,11021,"HECKLER, Margaret M.",MA,3,10,200,-0.925688616,-0.007,0,0,1,0,50
93,1,11022,"HUNT, John Edmund",NJ,12,1,200,1.457880586,0.272,1,0,0,1,60
93,1,11023,"KAZEN, Abraham, Jr.",TX,49,23,100,0.591617657,-0.219,0,1,0,1,62
93,1,11025,"KUYKENDALL, Dan Heflin",TN,54,8,200,1.260331834,0.246,0,0,0,1,57
93,1,11027,"KYROS, Peter Nicholas",ME,2,1,100,-1.168947514,-0.36,0,0,0,1,61
93,1,11031,"MATHIAS, Robert Bruce (Bob)",CA,71,18,200,0.20371879,0.119,0,1,0,1,60
93,1,11032,"MAYNE, Wiley",IA,31,6,200,0.362992162,0.307,0,0,0,1,62
93,1,11034,"MILLER, Clarence E.",OH,24,10,200,0.309262009,0.416,0,0,0,0,67
93,1,11035,"MONTGOMERY, Gillespie V. (Sonny)",MS,46,3,100,2.335065881,0.017,1,0,0,1,79
93,1,11036,"MYERS, John Thomas",IN,22,7,200,1.792097162,0.236,0,0,0,1,65
93,1,11037,"NICHOLS, William Flynt",AL,41,3,100,2.176801799,-0.042,1,0,0,1,75
93,1,11038,"PETTIS, Jerry Lyle",CA,71,33,200,0.740480972,0.173,0,0,0,1,67
93,1,11041,"RAILSBACK, Thomas Fisher",IL,21,19,200,-0.001128534,0.103,0,0,0,1,62
93,1,11042,"RARICK, John Richard",LA,45,6,100,0.961309529,0.333,0,0,0,1,70
93,1,11045,"RUPPE, Philip Edward",MI,23,11,200,-0.158736069,0.169,0,0,0,1,57
93,1,11046,"SANDMAN, Charles William, Jr.",NJ,12,2,200,0.293487295,0.139,0,0,0,1,66
93,1,11047,"SCHERLE, William Joseph",IA,31,5,200,2.775953883,0.362,0,0,0,1,63
93,1,11050,"STEIGER, Sam",AZ,61,3,200,2.773754743,0.447,0,0,0,1,72
93,1,11051,"STEIGER, William Albert",WI,25,6,200,0.331575797,0.336,0,0,0,0,57
93,1,11052,"STUCKEY, Williamson Sylvester, Jr.",GA,44,8,100,0.389128822,-0.114,0,0,0,0,78
93,1,11054,"WHALEN, Charles William, Jr.",OH,24,3,200,-1.573234905,-0.139,0,1,0,1,58
93,1,11055,"WIGGINS, Charles Edward",CA,71,25,200,0.895042028,0.359,0,0,0,1,70
93,1,11056,"WILLIAMS, Lawrence Gordon",PA,14,7,200,0.560121512,0.197,0,0,0,1,64
93,1,11057,"WINN, Edward Lawrence, Jr. (Larry)",KS,32,3,200,0.528768265,0.247,0,1,0,0,67
93,1,11058,"WYLIE, Chalmers Pangburn",OH,24,15,200,0.794009339,0.23,0,0,0,1,65
93,1,11059,"ZION, Roger Herschel",IN,22,8,200,1.710864963,0.285,0,0,0,1,65
93,1,11060,"ZWACH, John Matthew",MN,33,6,200,-0.138798568,0.179,0,0,0,0,53
93,1,11061,"TIERNAN, Robert Owens",RI,5,2,100,-1.253661249,-0.394,0,0,0,0,54
93,1,11062,"PRICE, Robert Dale",TX,49,13,200,2.591018637,0.304,1,0,0,1,76
93,1,11063,"McCLOSKEY, Paul Norton , Jr. (Pete)",CA,71,17,200,-1.111901384,0.028,0,0,0,1,52
93,1,11064,"PODELL, Bertram L.",NY,13,13,100,-1.308370302,-0.469,0,0,0,1,49
93,1,11066,"COLLINS, James Mitchell",TX,49,3,200,2.359302272,0.679,0,0,0,1,77
93,1,11067,"GAYDOS, Joseph Matthew",PA,14,20,100,0.065538571,-0.278,0,0,0,1,56
93,1,12000,"ALEXANDER, William Vollie (Bill), Jr.",AR,42,1,100,0.028704299,-0.41,0,0,0,1,69
93,1,12001,"ANDERSON, Glenn Malcolm",CA,71,35,100,-1.102723277,-0.269,0,0,0,1,54
93,1,12003,"BIAGGI, Mario",NY,13,10,100,-0.02993839,-0.339,0,0,0,0,63
93,1,12004,"BURLISON, Bill D.",MO,34,10,100,0.218393545,-0.475,0,0,0,1,66
93,1,12006,"CAMP, John Newbold Happy",OK,53,6,200,2.750714296,0.408,0,0,0,0,79
93,1,12007,"CHAPPELL, William Venroe, Jr.",FL,43,4,100,1.617371331,-0.098,0,0,0,1,77
93,1,12008,"CHISHOLM, Shirley Anita",NY,13,12,100,-2.564746589,-0.605,0,0,1,0,16
93,1,12009,"CLAY, William Lacy, Sr.",MO,34,1,100,-2.968038953,-0.49,0,0,0,1,31
93,1,12010,"COUGHLIN, Robert Lawrence",PA,14,13,200,-0.552810461,0.204,0,0,0,1,64
93,1,12011,"DANIEL, Wilbur Clarence (Dan)",VA,40,5,100,2.456751222,0.161,1,0,0,1,72
93,1,12012,"DENNIS, David Worth",IN,22,10,200,0.834012744,0.51,0,0,0,1,69
93,1,12013,"FISH, Hamilton, Jr.",NY,13,25,200,0.190910404,0.07,0,0,0,1,70
93,1,12014,"FLOWERS, Walter",AL,41,7,100,1.176968275,-0.147,0,0,0,1,66
93,1,12015,"FREY, Louis, Jr.",FL,43,9,200,1.189192681,0.244,0,0,0,1,81
93,1,12016,"HANSEN, Orval Howard",ID,63,2,200,0.35275746,0.155,0,0,0,1,74
93,1,12017,"HASTINGS, James Fred",NY,13,39,200,0.325532653,0.234,0,0,0,1,66
93,1,12018,"HOGAN, Lawrence Joseph",MD,52,5,200,0.694319392,0.158,0,0,0,0,57
93,1,12019,"KOCH, Edward Irving",NY,13,18,100,-2.00397949,-0.464,0,0,0,1,42
93,1,12020,"LANDGREBE, Earl Fredrick",IN,22,2,200,3.376871663,0.793,0,0,0,0,74
93,1,12022,"LUJ́N, Manuel, Jr.",NM,66,1,200,0.658881503,0.272,0,0,0,0,59
93,1,12023,"MANN, James Robert",SC,48,4,100,0.744182579,-0.032,0,0,0,1,80
93,1,12026,"MIZELL, Wilmer David (Vinegar Bend)",NC,47,5,200,1.435637305,0.244,0,0,0,1,71
93,1,12027,"PREYER, Lunsford Richardson",NC,47,6,100,-0.159603632,-0.27,0,0,0,1,72
93,1,12028,"RUTH, Earl Baker",NC,47,8,200,1.876289144,0.297,0,0,0,1,73
93,1,12029,"SEBELIUS, Keith George",KS,32,1,200,0.870233479,0.277,0,0,0,1,72
93,1,12030,"STOKES, Louis",OH,24,21,100,-3.069445765,-0.578,0,0,0,1,21
93,1,12031,"SYMINGTON, James Wadsworth",MO,34,2,100,-0.873300433,-0.331,0,0,0,1,63
93,1,12033,"WHITEHURST, George William",VA,40,2,200,0.97472428,0.233,1,0,0,1,68
93,1,12035,"YATRON, Gus",PA,14,6,100,-0.482211389,-0.174,0,1,0,0,63
93,1,12036,"OBEY, David Ross",WI,25,7,100,-1.539412121,-0.45,0,0,0,0,53
93,1,12037,"GOLDWATER, Barry Morris, Jr.",CA,71,27,200,1.497943654,0.355,0,0,0,0,64
93,1,12038,"JONES, Ed",TN,54,7,100,0.932119195,-0.245,0,0,0,0,75
93,1,12039,"MELCHER, John",MT,64,2,100,-0.411593826,-0.329,0,0,0,1,63
93,1,12040,"HARRINGTON, Michael Joseph",MA,3,6,100,-2.456858753,-0.477,0,1,0,0,47
93,1,12041,"CRANE, Philip Miller",IL,21,12,200,2.145392298,0.739,0,0,0,1,71
93,1,12042,"ROE, Robert A.",NJ,12,8,100,-0.69492504,-0.326,0,0,0,1,63
93,1,12044,"CARNEY, Charles Joseph",OH,24,19,100,-0.924828938,-0.479,0,0,0,0,52
93,1,12046,"FORSYTHE, Edwin Bell",NJ,12,6,200,-1.111977678,0.326,0,0,0,0,66
93,1,12047,"STEELE, Robert Hampton",CT,1,2,200,-0.524399995,-0.012,0,1,0,0,60
93,1,12048,"WARE, John Haines, III",PA,14,5,200,0.408026811,0.304,0,0,0,0,69
93,1,13001,"ABZUG, Bella Savitzky",NY,13,20,100,-3.373248716,-0.597,0,0,1,0,34
93,1,13002,"ARCHER, William Reynolds, Jr.",TX,49,7,200,0.890604554,0.496,0,0,0,1,82
93,1,13003,"ASPIN, Leslie",WI,25,1,100,-1.657453778,-0.32,1,0,0,1,59
93,1,13004,"BADILLO, Herman",NY,13,21,100,-3.742841632,-0.599,0,0,0,0,20
93,1,13005,"BAKER, LaMar",TN,54,3,200,1.392950819,0.308,0,0,0,1,72
93,1,13007,"BERGLAND, Robert Selmer",MN,33,7,100,-1.437237307,-0.38,0,0,0,0,54
93,1,13008,"BYRON, Goodloe Edgar",MD,52,6,100,1.344947983,-0.014,0,0,0,1,71
93,1,13009,"COTTER, William Ross",CT,1,1,100,-0.712490294,-0.313,0,0,0,0,51
93,1,13010,"DANIELSON, George Elmore",CA,71,29,100,-1.14427631,-0.477,0,0,0,1,54
93,1,13011,"DELLUMS, Ronald V.",CA,71,7,100,-2.623214155,-0.644,1,0,0,1,35
93,1,13012,"DENHOLM, Frank Edward",SD,37,1,100,-0.170301546,-0.522,0,0,0,0,51
93,1,13013,"DRINAN, Robert Frederick",MA,3,4,100,-3.396076169,-0.422,0,0,0,0,44
93,1,13014,"du PONT, Pierre Samuel, IV",DE,11,1,200,-0.435318573,0.169,0,1,0,1,60
93,1,13015,"FRENZEL, William Eldridge",MN,33,3,200,-1.054153945,0.353,0,0,0,1,59
93,1,13016,"GRASSO, Ella Tambussi",CT,1,6,100,-0.811249265,-0.291,0,0,1,0,58
93,1,13018,"HILLIS, Elwood Haynes",IN,22,5,200,0.738144365,0.173,1,0,0,1,70
93,1,13019,"KEATING, William John",OH,24,1,200,0.825459902,0.257,0,0,0,1,66
93,1,13019,"KEATING, William John",OH,24,1,200,0.825459902,0.257,0,0,0,1,66
93,1,13020,"KEMP, Jack French",NY,13,38,200,1.126606152,0.3,0,0,0,1,61
93,1,13021,"LENT, Norman Frederick",NY,13,4,200,0.276295824,0.183,0,0,0,1,64
93,1,13023,"MATHIS, Marvin Dawson",GA,44,2,100,1.762193072,-0.04,0,0,0,0,80
93,1,13024,"MAZZOLI, Romano Louis",KY,51,3,100,-0.595576887,-0.186,0,0,0,1,55
93,1,13025,"McCOLLISTER, John Yetter",NE,35,2,200,1.069226995,0.289,0,0,0,1,69
93,1,13026,"McCORMACK, Mike",WA,73,4,100,-0.928061885,-0.348,0,0,0,1,59
93,1,13027,"McKAY, Koln Gunn",UT,67,1,100,-0.084567504,-0.254,0,0,0,1,77
93,1,13029,"McKINNEY, Stewart Brett",CT,1,4,200,-0.751080232,-0.006,0,0,0,1,63
93,1,13030,"METCALFE, Ralph Harold",IL,21,1,100,-2.366919442,-0.564,0,0,0,1,10
93,1,13031,"MITCHELL, Parren James",MD,52,7,100,-3.320980353,-0.526,0,0,0,1,27
93,1,13032,"MURPHY, Morgan Francis",IL,21,2,100,-0.680144468,-0.399,0,0,0,0,34
93,1,13032,"MURPHY, Morgan Francis",IL,21,2,100,-0.680144468,-0.399,0,0,0,0,34
93,1,13032,"MURPHY, Morgan Francis",IL,21,2,100,-0.680144468,-0.399,0,0,0,1,34
93,1,13032,"MURPHY, Morgan Francis",IL,21,2,100,-0.680144468,-0.399,0,0,0,1,34
93,1,13034,"POWELL, Walter Eugene",OH,24,8,200,1.934378584,0.369,1,0,0,1,69
93,1,13035,"RANGEL, Charles B.",NY,13,19,100,-2.612179901,-0.514,0,0,0,1,19
93,1,13036,"ROBINSON, James Kenneth",VA,40,7,200,2.132479636,0.333,0,0,0,1,73
93,1,13037,"ROY, William Robert",KS,32,2,100,-0.441029178,-0.248,0,0,0,1,70
93,1,13038,"RUNNELS, Harold Lowell",NM,66,2,100,0.691430504,0.091,1,0,0,1,67
93,1,13039,"SARBANES, Paul Spyros",MD,52,3,100,-1.782723511,-0.435,0,0,0,0,67
93,1,13040,"SEIBERLING, John Frederick",OH,24,14,100,-2.280515914,-0.496,0,0,0,1,48
93,1,13041,"SHOUP, Richard Gardner (Dick)",MT,64,1,200,0.53052016,0.186,0,0,0,1,58
93,1,13042,"SPENCE, Floyd Davidson",SC,48,2,200,2.225671398,0.32,1,0,0,1,69
93,1,13043,"STANTON, James Vincent",OH,24,20,100,-0.560432506,-0.305,0,0,0,1,52
93,1,13045,"THONE, Charles",NE,35,1,200,-0.069999253,0.192,0,0,0,1,67
93,1,13046,"VEYSEY, Victor Vincent",CA,71,43,200,0.877280174,0.239,0,0,0,0,64
93,1,13047,"YOUNG, Charles William (Bill)",FL,43,6,200,2.007963867,0.325,1,0,0,1,69
93,1,13048,"DAVIS, Mendel Jackson",SC,48,1,100,1.200016812,-0.245,1,0,0,0,69
93,1,13049,"MILLS, William Oswald",MD,52,1,200,0.496674484,0.21,0,0,0,1,72
93,1,13049,"MILLS, William Oswald",MD,52,1,200,0.496674484,0.21,0,0,0,1,72
93,1,13050,"HEINZ, Henry John, III",PA,14,18,200,-0.695341612,0.078,0,0,0,1,63
93,1,13052,"MALLARY, Richard Walker",VT,6,1,200,-0.294370611,0.298,0,0,0,0,63
93,1,13055,"BUTLER, Manley Caldwell",VA,40,6,200,1.273066696,0.332,0,0,0,0,74
93,1,13056,"BREAUX, John Berlinger",LA,45,7,100,0.262035913,-0.123,0,0,0,0,68
93,1,14000,"ABDNOR, James",SD,37,2,200,1.15161395,0.241,0,0,0,0,58
93,1,14001,"ANDREWS, Ike Franklin",NC,47,4,100,0.161609735,-0.178,0,0,0,1,69
93,1,14002,"ARMSTRONG, William Lester",CO,62,5,200,0.907071602,0.508,1,0,0,0,71
93,1,14003,"BAFALIS, Louis Arthur (Skip)",FL,43,10,200,1.766460317,0.303,0,0,0,1,79
93,1,14004,"BEARD, Robin Leo, Jr.",TN,54,6,200,2.400284516,0.297,1,0,0,0,72
93,1,14005,"BOWEN, David Reece",MS,46,2,100,0.790863953,-0.134,0,0,0,0,77
93,1,14006,"BRECKINRIDGE, John Bayne",KY,51,6,100,0.198707869,-0.223,0,0,0,1,67
93,1,14007,"BURGENER, Clair Walter",CA,71,42,200,1.367893894,0.281,0,0,0,1,70
93,1,14008,"BURKE, Yvonne Brathwaite",CA,71,37,100,-1.710715094,-0.576,0,0,1,0,36
93,1,14009,"COCHRAN, William Thad",MS,46,4,200,1.716969502,0.286,0,0,0,1,76
93,1,14010,"COHEN, William Sebastian",ME,2,2,200,-0.502671135,0.1,0,0,0,0,62
93,1,14011,"CONLAN, John Bertrand",AZ,61,4,200,1.965104747,0.531,0,0,0,1,71
93,1,14012,"CRONIN, Paul William",MA,3,5,200,-0.520875532,0.003,0,0,0,0,47
93,1,14013,"DANIEL, Robert Williams, Jr.",VA,40,4,200,2.184820423,0.318,1,0,0,1,65
93,1,14014,"FROEHLICH, Harold Vernon",WI,25,8,200,1.090389062,0.296,0,0,0,0,61
93,1,14015,"GILMAN, Benjamin Arthur",NY,13,26,200,0.290834968,0.043,0,1,0,1,68
93,1,14016,"GINN, Ronald Bryan (Bo)",GA,44,1,100,0.549075187,-0.217,0,0,0,0,75
93,1,14017,"GUNTER, William Dawson, Jr. (Bill)",FL,43,5,100,0.094211716,-0.121,0,0,0,0,76
93,1,14018,"GUYER, Tennyson",OH,24,4,200,0.206859434,0.217,0,1,0,0,71
93,1,14019,"HANRAHAN, Robert Paul",IL,21,3,200,1.189956921,0.283,0,0,0,0,70
93,1,14020,"HINSHAW, Andrew Jackson",CA,71,39,200,1.164622047,0.265,0,0,0,1,75
93,1,14021,"HOLT, Marjorie Sewell",MD,52,4,200,1.870196129,0.368,1,0,1,0,70
93,1,14022,"HOLTZMAN, Elizabeth",NY,13,16,100,-2.769707067,-0.493,0,0,1,0,46
93,1,14023,"HUBER, Robert James",MI,23,18,200,1.943882179,0.459,0,0,0,1,63
93,1,14024,"HUDNUT, William Herbert, III",IN,22,11,200,1.565220444,0.314,0,0,0,0,66
93,1,14025,"JOHNSON, James Paul (Jim)",CO,62,4,200,-0.15667257,0.162,0,0,0,1,67
93,1,14026,"JONES, James Robert",OK,53,1,100,0.995514028,-0.095,1,0,0,1,79
93,1,14027,"JORDAN, Barbara Charline",TX,49,18,100,-1.274042785,-0.522,0,0,1,0,35
93,1,14028,"KETCHUM, William Matthew",CA,71,36,200,1.456861732,0.348,0,0,0,1,59
93,1,14029,"LEHMAN, William",FL,43,13,100,-1.185033918,-0.483,0,0,0,0,56
93,1,14030,"LITTON, Jerry Lon",MO,34,6,100,-0.289443389,-0.266,0,0,0,0,67
93,1,14031,"LOTT, Chester Trent",MS,46,5,200,2.474120235,0.39,0,0,0,0,87
93,1,14032,"McSPADDEN, Clem Rogers",OK,53,2,100,1.547008608,-0.236,0,0,0,0,73
93,1,14033,"MADIGAN, Edward Rell",IL,21,21,200,0.556604386,0.247,0,0,0,0,62
93,1,14034,"MARAZITI, Joseph James",NJ,12,13,200,1.522000345,0.148,0,0,0,0,70
93,1,14035,"MARTIN, James Grubbs",NC,47,9,200,1.194178871,0.347,0,0,0,0,70
93,1,14036,"MEZVINSKY, Edward Maurice",IA,31,1,100,-1.642403438,-0.414,0,0,0,0,56
93,1,14037,"MILFORD, Dale",TX,49,24,100,0.942856681,0.012,0,0,0,1,37
93,1,14038,"MITCHELL, Donald Jerome",NY,13,31,200,0.723361086,0.097,1,0,0,1,70
93,1,14039,"MOAKLEY, John Joseph",MA,3,9,329,-1.629405261,-0.418,0,0,0,1,41
93,1,14040,"MOORHEAD, Carlos John",CA,71,20,200,1.452182971,0.465,0,0,0,1,68
93,1,14041,"O'BRIEN, George Miller",IL,21,17,200,0.950337455,0.169,1,0,0,1,66
93,1,14042,"OWENS, Douglas Wayne",UT,67,2,100,-1.064911197,-0.253,0,0,0,0,67
93,1,14043,"PARRIS, Stanford E.",VA,40,8,200,0.704761838,0.287,0,0,0,1,67
93,1,14044,"PRITCHARD, Joel McFee",WA,73,1,200,-1.070329917,0.109,0,0,0,1,58
93,1,14045,"REGULA, Ralph Straus",OH,24,16,200,0.371758668,0.221,0,0,0,1,65
93,1,14046,"RINALDO, Matthew John",NJ,12,12,200,-0.279656322,0.023,0,0,0,0,63
93,1,14047,"RONCALLO, Angelo Dominick",NY,13,3,200,0.367997762,0.181,0,0,0,0,67
93,1,14048,"ROSE, Charles Grandison, III",NC,47,7,100,0.357825482,-0.319,0,0,0,0,70
93,1,14049,"RYAN, Leo Joseph",CA,71,11,100,-1.549672418,-0.364,0,1,0,1,53
93,1,14050,"SARASIN, Ronald Arthur",CT,1,5,200,-0.38032017,0.133,0,0,0,0,62
93,1,14051,"SCHROEDER, Patricia Scott",CO,62,1,100,-1.810867392,-0.225,1,0,1,0,55
93,1,14052,"SHUSTER, E. G. (Bud)",PA,14,9,200,1.490633468,0.416,0,0,0,1,74
93,1,14053,"STARK, Fortney Hillman (Pete), Jr.",CA,71,8,100,-2.453608746,-0.631,0,0,0,1,52
93,1,14054,"STEELMAN, Alan Watson",TX,49,5,200,0.282701255,0.255,0,0,0,0,69
93,1,14055,"STUDDS, Gerry Eastman",MA,3,12,100,-1.973444494,-0.444,0,0,0,0,52
93,1,14056,"SYMMS, Steven Douglas",ID,63,1,200,2.160766283,0.687,0,0,0,1,69
93,1,14057,"TAYLOR, Gene",MO,34,7,200,2.37331636,0.328,0,0,0,0,73
93,1,14058,"THORNTON, Raymond Hoyt (Ray), Jr.",AR,42,4,100,0.414246962,-0.306,0,0,0,1,69
93,1,14059,"TOWELL, David Gilmer",NV,65,1,200,1.069400557,0.239,0,0,0,0,64
93,1,14060,"TREEN, David Conner",LA,45,3,200,1.514247719,0.34,1,0,0,1,76
93,1,14061,"WALSH, William Francis",NY,13,33,200,0.711535097,0.068,0,0,0,0,70
93,1,14062,"WILSON, Charles",TX,49,2,100,-0.138124229,-0.196,0,1,0,1,67
93,1,14063,"YOUNG, Andrew Jackson, Jr.",GA,44,5,100,-2.299267167,-0.589,0,0,0,0,52
93,1,14064,"YOUNG, Samuel Hollingsworth",IL,21,10,200,0.108254609,0.247,0,0,0,1,62
93,1,14065,"YOUNG, Edward Lunn",SC,48,6,200,1.836122888,0.313,0,0,0,1,68
93,1,14066,"YOUNG, Donald Edwin",AK,81,1,200,1.495712097,0.278,0,0,0,1,63
93,1,14067,"BOGGS, Corinne Claiborne (Lindy)",LA,45,2,100,-0.323941517,-0.359,0,0,1,0,60
93,1,14068,"COLLINS, Cardiss",IL,21,7,100,-1.762665472,-0.552,0,0,1,0,26
93,1,14069,"BAUMAN, Robert Edmund",MD,52,1,200,0.854115724,0.533,0,0,0,0,72
93,1,14069,"BAUMAN, Robert Edmund",MD,52,1,200,0.854115724,0.533,0,0,0,0,72
93,1,14070,"LUKEN, Thomas Andrew",OH,24,1,100,-1.318113176,-0.163,0,0,0,1,66
93,1,14070,"LUKEN, Thomas Andrew",OH,24,1,100,-1.318113176,-0.163,0,0,0,1,66
93,1,14071,"LAGOMARSINO, Robert John",CA,71,13,200,1.679771375,0.378,0,1,0,1,64
93,1,14071,"LAGOMARSINO, Robert John",CA,71,13,200,1.679771375,0.378,0,1,0,1,64
93,1,14072,"MURTHA, John Patrick, Jr.",PA,14,12,100,0.681871421,-0.265,1,0,0,1,64
93,1,14072,"MURTHA, John Patrick, Jr.",PA,14,12,100,0.681871421,-0.265,1,0,0,1,64
93,1,14072,"MURTHA, John Patrick, Jr.",PA,14,12,100,0.681871421,-0.265,1,0,0,1,64
93,1,14072,"MURTHA, John Patrick, Jr.",PA,14,12,100,0.681871421,-0.265,1,0,0,1,64
93,1,14074,"VANDER VEEN, Richard Franklin",MI,23,5,100,-1.371316317,-0.364,0,0,0,1,61
93,1,14074,"VANDER VEEN, Richard Franklin",MI,23,5,100,-1.371316317,-0.364,0,0,0,1,61
93,1,14075,"TRAXLER, Jerome Bob",MI,23,8,100,-0.948533895,-0.33,0,0,0,1,64
93,1,14075,"TRAXLER, Jerome Bob",MI,23,8,100,-0.948533895,-0.33,0,0,0,1,64
93,1,14076,"BURTON, John Lowell",CA,71,6,100,-2.863062715,-0.413,0,0,0,0,52
93,1,14076,"BURTON, John Lowell",CA,71,6,100,-2.863062715,-0.413,0,0,0,0,52
93,1,90618,"REID, Ogden Rogers",NY,13,24,100,-1.399848799,-0.394,0,0,0,1,61
93,1,91043,"RIEGLE, Donald Wayne, Jr.",MI,23,7,200,-2.366151179,-0.075,0,0,0,0,54
93,1,93033,"PEYSER, Peter A.",NY,13,23,200,0.019314301,-0.055,0,0,0,1,61
94,2,267,"ASHLEY, Thomas William Ludlow",OH,24,9,100,-0.864505745,-0.35,0,0,0,1,49
94,2,465,"BARRETT, William Aloysius",PA,14,1,100,-0.962048859,-0.469,0,0,0,0,42
94,2,633,"BENNETT, Charles Edward",FL,43,3,100,0.791947438,-0.088,1,0,0,1,70
94,2,830,"BOLAND, Edward Patrick",MA,3,2,100,-1.053634107,-0.306,0,0,0,1,48
94,2,835,"BOLLING, Richard Walker",MO,34,5,100,-0.919092402,-0.504,0,0,0,1,53
94,2,948,"BRADEMAS, John",IN,22,3,100,-1.811971921,-0.462,0,0,0,1,64
94,2,1077,"BROOKS, Jack Bascom",TX,49,9,100,-0.242841579,-0.407,0,0,0,1,60
94,2,1087,"BROOMFIELD, William S.",MI,23,19,200,0.114052359,0.227,0,1,0,0,68
94,2,1265,"BURKE, James Anthony",MA,3,11,100,-0.553443057,-0.4,0,0,0,1,43
94,2,1282,"BURLESON, Omar Truman",TX,49,17,100,2.512921363,0.002,0,0,0,1,73
94,2,1577,"CASEY, Robert Randolph",TX,49,22,100,1.467124229,-0.098,0,0,0,0,65
94,2,1577,"CASEY, Robert Randolph",TX,49,22,100,1.467124229,-0.098,0,0,0,0,65
94,2,1610,"CEDERBERG, Elford Albin",MI,23,10,200,0.280340953,0.27,0,0,0,1,64
94,2,2009,"CONTE, Silvio Ottavio",MA,3,1,200,-0.887654695,-0.023,0,0,0,1,49
94,2,2329,"DANIELS, Dominick Vincent",NJ,12,14,100,-0.660178874,-0.386,0,0,0,0,60
94,2,2476,"DELANEY, James Joseph",NY,13,9,100,-0.036639171,-0.303,0,0,0,0,73
94,2,2513,"DENT, John Herman",PA,14,21,100,0.496300012,-0.384,0,0,0,1,58
94,2,2525,"DERWINSKI, Edward Joseph",IL,21,4,200,0.096681613,0.342,0,1,0,1,71
94,2,2533,"DEVINE, Samuel Leeper",OH,24,12,200,2.726086401,0.502,0,0,0,0,68
94,2,2594,"DIGGS, Charles Coles, Jr.",MI,23,13,100,-1.774414436,-0.539,0,1,0,1,16
94,2,2605,"DINGELL, John David, Jr.",MI,23,16,100,-0.734803422,-0.448,0,0,0,1,54
94,2,2706,"DOWNING, Thomas Nelms",VA,40,1,100,1.601914099,-0.065,0,0,0,1,69
94,2,3034,"EVINS, Joseph Landon",TN,54,4,100,0.514656958,-0.343,0,0,0,1,65
94,2,3078,"FASCELL, Dante Bruno",FL,43,15,100,-1.543947004,-0.4,0,1,0,1,63
94,2,3224,"FLOOD, Daniel John",PA,14,11,100,-0.224643321,-0.377,0,0,0,0,62
94,2,3242,"FLYNT, John James, Jr.",GA,44,6,100,1.877885377,0,0,0,0,1,80
94,2,3321,"FOUNTAIN, Lawrence H.",NC,47,2,100,1.172982954,-0.041,0,1,0,1,64
94,2,3553,"GIAIMO, Robert Nicholas",CT,1,3,100,-1.090916999,-0.318,0,0,0,1,62
94,2,3929,"HALEY, James Andrew",FL,43,8,100,1.41193806,0.098,0,0,0,1,79
94,2,4247,"HAYS, Wayne Levere",OH,24,18,100,-0.232076354,-0.304,0,1,0,1,71
94,2,4275,"H��BERT, Felix Edward",LA,45,1,100,1.275734291,-0.079,1,0,0,0,71
94,2,4276,"HECHLER, Kenneth William",WV,56,4,100,-1.38287354,-0.31,0,0,0,1,63
94,2,4957,"JOHNSON, Harold Terry",CA,71,1,100,-0.233856042,-0.439,0,0,0,0,55
94,2,5058,"JONES, Robert Emmett, Jr.",AL,41,5,100,-0.062763669,-0.358,0,0,0,1,75
94,2,5098,"KARTH, Joseph Edward",MN,33,4,100,-0.853362346,-0.386,0,0,0,1,47
94,2,5101,"KASTENMEIER, Robert William",WI,25,2,100,-2.256564479,-0.514,0,0,0,1,49
94,2,5436,"LANDRUM, Phillip Mitchell",GA,44,9,100,1.487290019,-0.134,0,0,0,1,75
94,2,5495,"LATTA, Delbert Leroy",OH,24,5,200,1.790030509,0.391,0,0,0,0,66
94,2,5873,"MACDONALD, Torbert Hart",MA,3,7,100,-1.443955703,-0.308,0,0,0,1,43
94,2,5900,"MADDEN, Ray John",IN,22,1,100,-1.113041403,-0.422,0,0,0,1,53
94,2,5924,"MAHON, George Herman",TX,49,19,100,1.020954641,-0.168,0,0,0,0,76
94,2,6240,"McFALL, John Joseph",CA,71,14,100,-0.549986557,-0.468,0,0,0,1,58
94,2,6455,"MICHEL, Robert Henry",IL,21,18,200,0.72846655,0.372,0,0,0,1,66
94,2,6532,"MILLS, Wilbur Daigh",AR,42,2,100,0.585030074,-0.237,0,0,0,0,64
94,2,6584,"MOLLOHAN, Robert Homer",WV,56,1,100,-0.097804662,-0.349,1,0,0,0,64
94,2,6661,"MOORHEAD, William Singer",PA,14,14,100,-1.163549025,-0.416,0,0,0,1,48
94,2,6685,"MORGAN, Thomas Ellsworth",PA,14,22,100,-0.529246885,-0.396,0,1,0,0,57
94,2,6756,"MOSS, John Emerson",CA,71,3,100,-1.578476204,-0.582,0,0,0,1,50
94,2,6845,"NATCHER, William Huston",KY,51,2,100,0.313920497,-0.288,0,0,0,1,65
94,2,6936,"NIX, Robert Nelson Cornelius, Sr.",PA,14,2,100,-1.245918639,-0.536,0,1,0,0,25
94,2,7043,"O'HARA, James Grant",MI,23,12,100,-0.909095529,-0.45,0,0,0,1,65
94,2,7081,"O'NEILL, Thomas Philip, Jr. (Tip)",MA,3,8,100,-1.205331355,-0.402,0,0,0,0,34
94,2,7228,"PASSMAN, Otto Ernest",LA,45,5,100,1.051423348,-0.056,0,0,0,1,73
94,2,7232,"PATMAN, John William Wright",TX,49,1,100,-0.235542746,-0.396,0,0,0,1,70
94,2,7232,"PATMAN, John William Wright",TX,49,1,100,-0.235542746,-0.396,0,0,0,1,70
94,2,7333,"PEPPER, Claude Denson",FL,43,14,100,-0.687840765,-0.422,0,0,0,0,58
94,2,7343,"PERKINS, Carl Dewey",KY,51,7,100,-0.390958962,-0.343,0,0,0,1,58
94,2,7498,"POAGE, William Robert",TX,49,11,100,2.254343054,-0.082,0,0,0,1,70
94,2,7610,"PRICE, Charles Melvin",IL,21,23,100,-0.610533669,-0.429,1,0,0,1,53
94,2,7671,"QUIE, Albert Harold",MN,33,1,200,-0.095649395,0.189,0,0,0,1,60
94,2,7717,"RANDALL, William Joseph",MO,34,4,100,0.801531241,-0.184,1,0,0,1,69
94,2,7824,"REUSS, Henry Schoellkopf",WI,25,5,100,-2.079941692,-0.481,0,0,0,1,42
94,2,7845,"RHODES, John Jacob",AZ,61,1,200,0.401588029,0.225,0,0,0,1,68
94,2,8010,"RODINO, Peter Wallace, Jr.",NJ,12,10,100,-1.81026489,-0.435,0,0,0,1,37
94,2,8032,"ROGERS, Paul Grant",FL,43,11,100,0.488987399,-0.085,0,0,0,1,74
94,2,8080,"ROSTENKOWSKI, Daniel David",IL,21,8,100,-0.56127831,-0.39,0,0,0,1,44
94,2,8084,"ROUSH, John Edward",IN,22,4,100,-0.231575874,-0.233,0,0,0,1,67
94,2,8268,"SCHNEEBELI, Herman Theodore",PA,14,17,200,0.301188476,0.389,0,0,0,1,71
94,2,8474,"SHIPLEY, George Edward",IL,21,22,100,0.344691967,-0.284,0,0,0,1,64
94,2,8507,"SIKES, Robert Lee Fulton",FL,43,1,100,1.270343704,-0.128,0,0,0,1,84
94,2,8549,"SISK, Bernice Frederic",CA,71,15,100,0.055747094,-0.388,0,0,0,0,72
94,2,8564,"SLACK, John Mark, Jr.",WV,56,3,100,0.263017491,-0.281,0,0,0,0,62
94,2,8672,"SMITH, Neal Edward",IA,31,4,100,-0.988836871,-0.313,0,0,0,1,56
94,2,8824,"STAGGERS, Harley Orrin",WV,56,2,100,0.011431606,-0.345,0,0,0,1,65
94,2,8866,"STEED, Thomas Jefferson",OK,53,4,100,0.715318374,-0.279,0,0,0,1,74
94,2,9017,"STRATTON, Samuel Studdiford",NY,13,28,100,0.384820785,-0.139,1,0,0,1,57
94,2,9072,"SULLIVAN, Leonor Kretzer",MO,34,3,100,0.005735936,-0.386,0,0,1,0,58
94,2,9230,"TAYLOR, Roy Arthur",NC,47,11,100,0.990607588,-0.069,0,1,0,1,71
94,2,9241,"TEAGUE, Olin Earl",TX,49,6,100,1.705015085,-0.102,0,0,0,1,72
94,2,9322,"THOMPSON, Frank, Jr.",NJ,12,4,100,-2.339652434,-0.511,0,0,0,1,58
94,2,9551,"ULLMAN, Albert Conrad",OR,72,2,100,-0.798829087,-0.367,0,0,0,1,60
94,2,9623,"VANIK, Charles Albert",OH,24,22,100,-2.157667861,-0.366,0,0,0,1,57
94,2,9802,"WAMPLER, William Creed",VA,40,9,200,1.496540135,0.146,0,0,0,1,68
94,2,10075,"WHITTEN, Jamie Lloyd",MS,46,1,100,1.560912432,-0.161,0,0,0,0,80
94,2,10249,"WILSON, Robert Carlton (Bob)",CA,71,41,200,0.502331485,0.264,1,0,0,1,63
94,2,10391,"WRIGHT, James Claude, Jr.",TX,49,12,100,-0.128834171,-0.383,0,0,0,1,62
94,2,10421,"YATES, Sidney Richard",IL,21,9,100,-2.044864555,-0.494,0,0,0,1,42
94,2,10446,"YOUNG, John Andrew",TX,49,14,100,0.667986972,-0.342,0,0,0,0,61
94,2,10463,"ZABLOCKI, Clement John",WI,25,4,100,-0.14542256,-0.355,0,1,0,0,49
94,2,10500,"ADDABBO, Joseph Patrick",NY,13,7,100,-1.63049977,-0.402,0,0,0,0,41
94,2,10501,"ANDERSON, John Bayard",IL,21,16,200,-0.526378052,0.183,0,0,0,1,66
94,2,10502,"ASHBROOK, John Milan",OH,24,17,200,3.084715253,0.612,0,0,0,1,69
94,2,10505,"BELL, Alphonzo",CA,71,27,200,0.499287246,0.183,0,0,0,1,64
94,2,10510,"CLANCY, Donald Daniel",OH,24,2,200,1.722534886,0.403,0,0,0,0,67
94,2,10511,"CORMAN, James Charles",CA,71,21,100,-2.00891799,-0.53,0,0,0,1,56
94,2,10517,"FINDLEY, Paul",IL,21,20,200,-0.466264375,0.246,0,1,0,1,64
94,2,10520,"GONŹLEZ, Henry B.",TX,49,20,100,-0.340384148,-0.538,0,0,0,0,40
94,2,10525,"HARSHA, William Howard",OH,24,6,200,1.707376129,0.188,0,0,0,1,70
94,2,10527,"HENDERSON, David Newton",NC,47,3,100,1.097350201,-0.108,0,0,0,1,74
94,2,10528,"ICHORD, Richard Howard, II",MO,34,8,100,2.184101406,0.001,1,0,0,0,68
94,2,10539,"MOSHER, Charles Adams",OH,24,13,200,-1.484879293,0.177,0,0,0,0,59
94,2,10540,"NEDZI, Lucien Norbert",MI,23,14,100,-1.429446537,-0.427,1,0,0,1,60
94,2,10545,"PIKE, Otis Grey",NY,13,1,100,-0.448626966,-0.162,0,0,0,1,70
94,2,10550,"ROBERTS, Herbert Ray",TX,49,4,100,1.718152346,-0.131,0,0,0,1,72
94,2,10551,"ROSENTHAL, Benjamin Stanley",NY,13,8,100,-3.140120083,-0.562,0,1,0,1,50
94,2,10553,"ROUSSELOT, John Harbin",CA,71,26,200,2.787157301,0.601,0,0,0,0,70
94,2,10559,"SHRIVER, Garner E.",KS,32,4,200,0.527898276,0.175,0,0,0,1,68
94,2,10561,"ST. GERMAIN, Fernand Joseph",RI,5,1,100,-1.444674597,-0.355,0,0,0,1,52
94,2,10563,"STEPHENS, Robert Grier, Jr.",GA,44,10,100,0.886351417,-0.194,0,0,0,1,73
94,2,10566,"UDALL, Morris King",AZ,61,2,100,-1.960337665,-0.387,0,0,0,1,57
94,2,10567,"WAGGONNER, Joseph David, Jr.",LA,45,4,100,2.138027307,0.015,0,0,0,1,75
94,2,10569,"ANDREWS, Mark",ND,36,1,200,0.713313503,0.087,0,0,0,1,63
94,2,10573,"BROWN, George Edward, Jr.",CA,71,36,100,-1.74579813,-0.506,0,0,0,1,53
94,2,10574,"BROYHILL, James Thomas",NC,47,10,200,1.007316169,0.269,0,0,0,0,73
94,2,10577,"BURTON, Phillip",CA,71,6,100,-3.280818185,-0.634,0,0,0,1,43
94,2,10579,"CLAUSEN, Donald Holst",CA,71,2,200,1.223208749,0.16,0,0,0,1,56
94,2,10580,"CLAWSON, Delwin Morgan",CA,71,33,200,2.398900362,0.483,0,0,0,0,70
94,2,10581,"CLEVELAND, James Colgate",NH,4,2,200,0.906822588,0.218,0,0,0,1,62
94,2,10582,"DUNCAN, Robert Blackford",OR,72,3,100,-0.501359002,-0.341,0,0,0,1,48
94,2,10583,"EDWARDS, William Donlon (Don)",CA,71,10,100,-3.663358735,-0.599,0,0,0,1,47
94,2,10585,"FRASER, Donald MacKay",MN,33,5,100,-2.143591487,-0.469,0,1,0,1,44
94,2,10586,"FULTON, Richard Harmon",TN,54,5,100,-0.738852684,-0.332,0,0,0,1,63
94,2,10586,"FULTON, Richard Harmon",TN,54,5,100,-0.738852684,-0.332,0,0,0,1,63
94,2,10587,"FUQUA, Don",FL,43,2,100,0.703626687,-0.173,0,0,0,1,69
94,2,10588,"GIBBONS, Sam Melville",FL,43,7,100,-0.484248147,-0.233,0,0,0,1,70
94,2,10591,"GREEN, William Joseph",PA,14,3,100,-1.946413366,-0.415,0,0,0,0,46
94,2,10595,"HAWKINS, Augustus Freeman (Gus)",CA,71,29,100,-2.052744371,-0.517,0,0,0,0,26
94,2,10596,"HORTON, Frank Jefferson",NY,13,34,200,-0.488939581,-0.004,0,0,0,1,63
94,2,10597,"HUTCHINSON, J. Edward",MI,23,4,200,2.047102521,0.444,0,0,0,1,68
94,2,10598,"JOHNSON, Albert Walter",PA,14,23,200,0.583976716,0.197,0,0,0,0,66
94,2,10599,"LEGGETT, Robert Louis",CA,71,4,100,-1.806937132,-0.468,1,0,0,1,51
94,2,10601,"LONG, Clarence Dickinson",MD,52,2,100,-0.959985767,-0.274,0,0,0,1,68
94,2,10602,"LONG, Gillis William",LA,45,8,100,-0.225274081,-0.368,0,0,0,1,63
94,2,10605,"MATSUNAGA, Spark Masayuki",HI,82,1,100,-1.322033331,-0.379,0,0,0,1,62
94,2,10606,"McCLORY, Robert",IL,21,13,200,-0.146566189,0.256,0,0,0,1,70
94,2,10607,"McDADE, Joseph Michael",PA,14,10,200,-0.220972945,0.093,0,0,0,0,64
94,2,10609,"MINISH, Joseph George",NJ,12,11,100,-0.520198921,-0.299,0,0,0,1,60
94,2,10611,"MURPHY, John Michael",NY,13,17,100,-0.099209748,-0.406,0,0,0,1,62
94,2,10613,"PATTEN, Edward James",NJ,12,15,100,-0.70443224,-0.424,0,0,0,0,61
94,2,10614,"PICKLE, James Jarrell (Jake)",TX,49,10,100,0.08308935,-0.218,0,0,0,1,59
94,2,10616,"QUILLEN, James Henry",TN,54,1,200,1.9744313,0.246,0,0,0,1,78
94,2,10620,"ROONEY, Frederick Bernard",PA,14,15,100,-0.610837128,-0.35,0,0,0,1,60
94,2,10621,"ROYBAL, Edward R.",CA,71,25,100,-2.702564,-0.61,0,0,0,1,43
94,2,10625,"SKUBITZ, Joe",KS,32,5,200,0.995350739,0.189,0,0,0,0,71
94,2,10626,"SNYDER, Marion Gene",KY,51,4,200,2.25294291,0.26,0,0,0,0,70
94,2,10631,"TALCOTT, Burt Lacklen",CA,71,16,200,0.772714701,0.25,0,0,0,1,56
94,2,10633,"VAN DEERLIN, Lionel",CA,71,42,100,-0.98750069,-0.401,0,0,0,1,57
94,2,10638,"WYDLER, John Waldemar",NY,13,5,200,0.410139704,0.277,0,0,0,1,63
94,2,10640,"WILSON, Charles Herbert",CA,71,31,100,-0.596964757,-0.39,1,0,0,1,46
94,2,10700,"ADAMS, Brockman (Brock)",WA,73,7,100,-1.147771181,-0.396,0,0,0,1,56
94,2,10703,"ANNUNZIO, Frank",IL,21,11,100,-0.402865595,-0.398,0,0,0,0,63
94,2,10705,"BINGHAM, Jonathan Brewster",NY,13,22,100,-2.462189474,-0.509,0,1,0,1,40
94,2,10706,"BUCHANAN, John Hall, Jr.",AL,41,6,200,-0.046806427,0.146,0,1,0,1,72
94,2,10710,"CARTER, Tim Lee",KY,51,5,200,1.566167935,0.08,0,0,0,1,73
94,2,10712,"CONABLE, Barber Benjamin, Jr.",NY,13,35,200,0.156050176,0.371,0,0,0,1,66
94,2,10713,"CONYERS, John, Jr.",MI,23,1,100,-2.556516462,-0.658,0,0,0,1,14
94,2,10716,"de la GARZA, Eligio, II (Kika)",TX,49,15,100,0.799782203,-0.255,0,0,0,1,55
94,2,10717,"DICKINSON, William Louis",AL,41,2,200,1.774087762,0.398,1,0,0,1,78
94,2,10719,"DUNCAN, John James",TN,54,2,200,1.936063292,0.194,0,0,0,1,73
94,2,10721,"EDWARDS, William Jackson (Jack)",AL,41,1,200,1.104608643,0.177,0,0,0,1,76
94,2,10722,"ERLENBORN, John Neal",IL,21,14,200,0.129732893,0.315,0,0,0,1,75
94,2,10723,"EVANS, Frank Edward",CO,62,3,100,-1.04000421,-0.331,0,0,0,1,64
94,2,10726,"FOLEY, Thomas Stephen",WA,73,5,100,-0.786391453,-0.354,0,0,0,0,63
94,2,10727,"FORD, William David",MI,23,15,100,-1.741908831,-0.516,0,0,0,1,61
94,2,10732,"HAMILTON, Lee Herbert",IN,22,9,100,-0.812650418,-0.171,0,1,0,0,64
94,2,10733,"HANLEY, James Michael",NY,13,32,100,-0.402162297,-0.306,0,0,0,1,70
94,2,10734,"HANSEN, George Vernon",ID,63,2,200,3.994924385,0.621,0,0,0,1,74
94,2,10737,"HELSTOSKI, Henry",NJ,12,9,100,-2.149194505,-0.484,0,0,0,1,66
94,2,10738,"HICKS, Floyd Verne",WA,73,6,100,-0.415127673,-0.414,1,0,0,1,60
94,2,10739,"HOWARD, James John",NJ,12,3,100,-1.69954385,-0.431,0,0,0,1,67
94,2,10740,"HUNGATE, William Leonard",MO,34,9,100,-0.530465684,-0.332,0,0,0,1,65
94,2,10742,"JACOBS, Andrew, Jr.",IN,22,11,100,-1.321827777,-0.07,0,0,0,1,66
94,2,10749,"McEWEN, Robert Cameron",NY,13,30,200,0.422271024,0.234,0,0,0,1,67
94,2,10756,"MEEDS, Edwin Lloyd",WA,73,2,100,-1.227343409,-0.453,0,0,0,1,62
94,2,10757,"MINK, Patsy Takemoto",HI,82,2,100,-2.060311813,-0.513,0,0,1,0,63
94,2,10760,"OTTINGER, Richard Lawrence",NY,13,24,100,-2.500734793,-0.391,0,0,0,0,61
94,2,10766,"RONCALIO, Teno",WY,68,1,100,-1.228338248,-0.457,0,0,0,1,69
94,2,10767,"SATTERFIELD, David Edward, III",VA,40,3,100,3.558207219,0.265,0,0,0,1,72
94,2,10768,"SCHEUER, James Haas",NY,13,11,100,-2.126255611,-0.478,0,0,0,1,52
94,2,10773,"STANTON, John William",OH,24,11,200,-0.166956459,0.135,0,0,0,1,62
94,2,10778,"VIGORITO, Joseph Phillip",PA,14,24,100,-0.299541428,-0.311,0,0,0,1,61
94,2,10783,"WHITE, Richard Crawford",TX,49,16,100,0.791591363,-0.137,1,0,0,1,64
94,2,10784,"WOLFF, Lester Lionel",NY,13,6,100,-1.098579241,-0.264,0,1,0,1,62
94,2,10786,"BROWN, Clarence J., Jr.",OH,24,7,200,0.680786601,0.3,0,0,0,1,67
94,2,10788,"JONES, Walter Beaman, Sr.",NC,47,1,100,0.830603864,-0.259,0,0,0,0,70
94,2,10790,"REES, Thomas Mankell",CA,71,23,100,-1.79339259,-0.484,0,0,0,1,50
94,2,10794,"VANDER JAGT, Guy Adrian",MI,23,9,200,0.275877917,0.247,0,0,0,0,67
94,2,11000,"BEVILL, Tom",AL,41,4,100,1.753779161,-0.213,0,0,0,1,78
94,2,11001,"BIESTER, Edward George, Jr.",PA,14,8,200,-0.958012975,0.035,0,1,0,0,65
94,2,11005,"BRINKLEY, Jack Thomas",GA,44,3,100,1.645588508,-0.073,1,0,0,1,78
94,2,11006,"BROWN, Garry Eldridge",MI,23,3,200,0.524002383,0.302,0,0,0,1,62
94,2,11007,"BURKE, J. Herbert",FL,43,12,200,0.935019855,0.241,0,1,0,1,72
94,2,11013,"ECKHARDT, Robert Christian",TX,49,8,100,-1.956192335,-0.547,0,0,0,1,55
94,2,11014,"EILBERG, Joshua",PA,14,4,100,-1.343633827,-0.443,0,0,0,1,56
94,2,11015,"ESCH, Marvin Leonel",MI,23,2,200,-0.134687516,0.134,0,0,0,1,56
94,2,11016,"ESHLEMAN, Edwin Duing",PA,14,16,200,1.371254191,0.276,0,0,0,1,76
94,2,11019,"GUDE, Gilbert",MD,52,8,200,-1.236235848,-0.028,0,0,0,1,57
94,2,11020,"HAMMERSCHMIDT, John Paul",AR,42,3,200,1.960827748,0.253,0,0,0,1,74
94,2,11021,"HECKLER, Margaret M.",MA,3,10,200,-0.957417459,-0.007,0,0,1,0,50
94,2,11023,"KAZEN, Abraham, Jr.",TX,49,23,100,0.980860938,-0.219,1,0,0,1,62
94,2,11034,"MILLER, Clarence E.",OH,24,10,200,1.558745578,0.416,0,0,0,0,67
94,2,11035,"MONTGOMERY, Gillespie V. (Sonny)",MS,46,3,100,2.295705713,0.017,1,0,0,1,79
94,2,11036,"MYERS, John Thomas",IN,22,7,200,2.152438072,0.236,0,0,0,1,65
94,2,11037,"NICHOLS, William Flynt",AL,41,3,100,1.724366471,-0.042,1,0,0,1,75
94,2,11038,"PETTIS, Jerry Lyle",CA,71,37,200,1.196270135,0.173,0,0,0,1,66
94,2,11038,"PETTIS, Jerry Lyle",CA,71,37,200,1.196270135,0.173,0,0,0,1,66
94,2,11041,"RAILSBACK, Thomas Fisher",IL,21,19,200,-0.350206483,0.103,0,0,0,1,62
94,2,11043,"RIEGLE, Donald Wayne, Jr.",MI,23,7,100,-1.918814972,-0.426,0,1,0,0,54
94,2,11045,"RUPPE, Philip Edward",MI,23,11,200,0.090985235,0.169,0,0,0,1,57
94,2,11050,"STEIGER, Sam",AZ,61,3,200,2.72068784,0.447,0,0,0,1,72
94,2,11051,"STEIGER, William Albert",WI,25,6,200,-0.109632094,0.336,0,0,0,0,57
94,2,11052,"STUCKEY, Williamson Sylvester, Jr.",GA,44,8,100,1.390911386,-0.114,0,0,0,0,78
94,2,11054,"WHALEN, Charles William, Jr.",OH,24,3,200,-1.419704559,-0.139,0,1,0,1,68
94,2,11055,"WIGGINS, Charles Edward",CA,71,39,200,0.868247084,0.359,0,0,0,1,73
94,2,11057,"WINN, Edward Lawrence, Jr. (Larry)",KS,32,3,200,0.541969058,0.247,0,1,0,0,67
94,2,11058,"WYLIE, Chalmers Pangburn",OH,24,15,200,1.123231306,0.23,0,0,0,1,65
94,2,11063,"McCLOSKEY, Paul Norton , Jr. (Pete)",CA,71,12,200,-1.102039474,0.028,0,0,0,1,53
94,2,11066,"COLLINS, James Mitchell",TX,49,3,200,2.440222207,0.679,0,0,0,1,80
94,2,11067,"GAYDOS, Joseph Matthew",PA,14,20,100,-0.066981341,-0.278,0,0,0,1,56
94,2,12000,"ALEXANDER, William Vollie (Bill), Jr.",AR,42,1,100,0.416195087,-0.41,0,0,0,1,69
94,2,12001,"ANDERSON, Glenn Malcolm",CA,71,32,100,-1.179101052,-0.269,0,0,0,1,56
94,2,12003,"BIAGGI, Mario",NY,13,10,100,-0.1277783,-0.339,0,0,0,0,63
94,2,12004,"BURLISON, Bill D.",MO,34,10,100,0.364797633,-0.475,0,0,0,1,66
94,2,12007,"CHAPPELL, William Venroe, Jr.",FL,43,4,100,1.438842585,-0.098,0,0,0,1,77
94,2,12008,"CHISHOLM, Shirley Anita",NY,13,12,100,-3.909050779,-0.605,0,0,1,0,NA
94,2,12009,"CLAY, William Lacy, Sr.",MO,34,1,100,-3.374876625,-0.49,0,0,0,1,31
94,2,12010,"COUGHLIN, Robert Lawrence",PA,14,13,200,-0.357243553,0.204,0,0,0,1,64
94,2,12011,"DANIEL, Wilbur Clarence (Dan)",VA,40,5,100,2.164394223,0.161,1,0,0,1,72
94,2,12013,"FISH, Hamilton, Jr.",NY,13,25,200,0.135746443,0.07,0,0,0,1,70
94,2,12014,"FLOWERS, Walter",AL,41,7,100,0.988560056,-0.147,0,0,0,1,66
94,2,12015,"FREY, Louis, Jr.",FL,43,9,200,1.714630587,0.244,0,0,0,1,81
94,2,12017,"HASTINGS, James Fred",NY,13,39,200,0.455332916,0.234,0,0,0,1,66
94,2,12017,"HASTINGS, James Fred",NY,13,39,200,0.455332916,0.234,0,0,0,1,66
94,2,12019,"KOCH, Edward Irving",NY,13,18,100,-2.49871081,-0.464,0,0,0,1,42
94,2,12022,"LUJ́N, Manuel, Jr.",NM,66,1,200,0.930654657,0.272,0,0,0,0,59
94,2,12023,"MANN, James Robert",SC,48,4,100,0.728235648,-0.032,0,0,0,1,80
94,2,12025,"MIKVA, Abner Joseph",IL,21,10,100,-2.449925797,-0.441,0,0,0,1,62
94,2,12027,"PREYER, Lunsford Richardson",NC,47,6,100,-0.211795901,-0.27,0,0,0,1,72
94,2,12029,"SEBELIUS, Keith George",KS,32,1,200,1.262579174,0.277,0,0,0,1,72
94,2,12030,"STOKES, Louis",OH,24,21,100,-3.530533715,-0.578,0,0,0,1,21
94,2,12031,"SYMINGTON, James Wadsworth",MO,34,2,100,-0.917939863,-0.331,0,0,0,1,63
94,2,12033,"WHITEHURST, George William",VA,40,2,200,0.826040338,0.233,1,0,0,1,68
94,2,12035,"YATRON, Gus",PA,14,6,100,-0.127164648,-0.174,0,1,0,0,63
94,2,12036,"OBEY, David Ross",WI,25,7,100,-1.735461776,-0.45,0,0,0,0,53
94,2,12037,"GOLDWATER, Barry Morris, Jr.",CA,71,20,200,1.271455166,0.355,0,0,0,0,68
94,2,12038,"JONES, Ed",TN,54,7,100,1.118471554,-0.245,0,0,0,0,75
94,2,12039,"MELCHER, John",MT,64,2,100,-0.841799936,-0.329,0,0,0,1,63
94,2,12040,"HARRINGTON, Michael Joseph",MA,3,6,100,-2.837976061,-0.477,0,1,0,0,47
94,2,12041,"CRANE, Philip Miller",IL,21,12,200,3.263259635,0.739,0,0,0,1,71
94,2,12042,"ROE, Robert A.",NJ,12,8,100,-0.599482566,-0.326,0,0,0,1,63
94,2,12044,"CARNEY, Charles Joseph",OH,24,19,100,-1.183140266,-0.479,0,0,0,0,52
94,2,12046,"FORSYTHE, Edwin Bell",NJ,12,6,200,-0.945555815,0.326,0,0,0,0,66
94,2,13001,"ABZUG, Bella Savitzky",NY,13,20,100,-4.314461573,-0.597,0,0,1,0,34
94,2,13002,"ARCHER, William Reynolds, Jr.",TX,49,7,200,2.389640745,0.496,0,0,0,1,81
94,2,13003,"ASPIN, Leslie",WI,25,1,100,-1.725782931,-0.32,1,0,0,1,59
94,2,13004,"BADILLO, Herman",NY,13,21,100,-3.770368918,-0.599,0,0,0,0,20
94,2,13007,"BERGLAND, Robert Selmer",MN,33,7,100,-1.39029626,-0.38,0,0,0,0,54
94,2,13008,"BYRON, Goodloe Edgar",MD,52,6,100,1.41230125,-0.014,0,0,0,1,71
94,2,13009,"COTTER, William Ross",CT,1,1,100,-0.883380423,-0.313,0,0,0,0,51
94,2,13010,"DANIELSON, George Elmore",CA,71,30,100,-0.727062359,-0.477,0,0,0,1,54
94,2,13011,"DELLUMS, Ronald V.",CA,71,8,100,-3.005336172,-0.644,1,0,0,1,39
94,2,13013,"DRINAN, Robert Frederick",MA,3,4,100,-3.054286283,-0.422,0,0,0,0,44
94,2,13014,"du PONT, Pierre Samuel, IV",DE,11,1,200,-0.272270741,0.169,0,1,0,1,60
94,2,13015,"FRENZEL, William Eldridge",MN,33,3,200,-0.546843302,0.353,0,0,0,1,59
94,2,13018,"HILLIS, Elwood Haynes",IN,22,5,200,0.554587181,0.173,1,0,0,1,70
94,2,13020,"KEMP, Jack French",NY,13,38,200,1.795081211,0.3,0,0,0,1,61
94,2,13021,"LENT, Norman Frederick",NY,13,4,200,0.441284283,0.183,0,0,0,1,64
94,2,13023,"MATHIS, Marvin Dawson",GA,44,2,100,1.562639644,-0.04,0,0,0,0,80
94,2,13024,"MAZZOLI, Romano Louis",KY,51,3,100,-0.704505964,-0.186,0,0,0,1,55
94,2,13025,"McCOLLISTER, John Yetter",NE,35,2,200,1.46860448,0.289,0,0,0,1,69
94,2,13026,"McCORMACK, Mike",WA,73,4,100,-0.484238561,-0.348,0,0,0,1,59
94,2,13027,"McKAY, Koln Gunn",UT,67,1,100,-0.393322178,-0.254,0,0,0,1,77
94,2,13029,"McKINNEY, Stewart Brett",CT,1,4,200,-1.164642193,-0.006,0,0,0,1,63
94,2,13030,"METCALFE, Ralph Harold",IL,21,1,100,-2.222089716,-0.564,0,0,0,1,10
94,2,13031,"MITCHELL, Parren James",MD,52,7,100,-3.727131815,-0.526,0,0,0,1,27
94,2,13032,"MURPHY, Morgan Francis",IL,21,2,100,-0.628130743,-0.399,0,0,0,1,34
94,2,13035,"RANGEL, Charles B.",NY,13,19,100,-3.681324298,-0.514,0,0,0,1,19
94,2,13036,"ROBINSON, James Kenneth",VA,40,7,200,2.299586403,0.333,0,0,0,1,73
94,2,13038,"RUNNELS, Harold Lowell",NM,66,2,100,1.37475582,0.091,1,0,0,1,67
94,2,13039,"SARBANES, Paul Spyros",MD,52,3,100,-1.682728351,-0.435,0,0,0,0,67
94,2,13040,"SEIBERLING, John Frederick",OH,24,14,100,-2.762894155,-0.496,0,0,0,1,48
94,2,13042,"SPENCE, Floyd Davidson",SC,48,2,200,1.961352437,0.32,1,0,0,1,69
94,2,13043,"STANTON, James Vincent",OH,24,20,100,-1.431342606,-0.305,0,0,0,1,52
94,2,13045,"THONE, Charles",NE,35,1,200,0.981144942,0.192,0,0,0,1,67
94,2,13047,"YOUNG, Charles William (Bill)",FL,43,6,200,2.234818447,0.325,0,0,0,1,69
94,2,13048,"DAVIS, Mendel Jackson",SC,48,1,100,0.107835512,-0.245,1,0,0,0,69
94,2,13050,"HEINZ, Henry John, III",PA,14,18,200,-0.399575303,0.078,0,0,0,1,63
94,2,13055,"BUTLER, Manley Caldwell",VA,40,6,200,1.697985932,0.332,0,0,0,0,75
94,2,13056,"BREAUX, John Berlinger",LA,45,7,100,0.769274685,-0.123,0,0,0,0,68
94,2,14000,"ABDNOR, James",SD,37,2,200,1.399323013,0.241,0,0,0,0,58
94,2,14001,"ANDREWS, Ike Franklin",NC,47,4,100,0.399457651,-0.178,0,0,0,1,69
94,2,14002,"ARMSTRONG, William Lester",CO,62,5,200,1.455352029,0.508,0,0,0,0,71
94,2,14003,"BAFALIS, Louis Arthur (Skip)",FL,43,10,200,2.235349379,0.303,0,0,0,1,79
94,2,14004,"BEARD, Robin Leo, Jr.",TN,54,6,200,2.218479636,0.297,1,0,0,0,72
94,2,14005,"BOWEN, David Reece",MS,46,2,100,1.421553525,-0.134,0,0,0,0,77
94,2,14006,"BRECKINRIDGE, John Bayne",KY,51,6,100,0.051103232,-0.223,0,0,0,1,67
94,2,14007,"BURGENER, Clair Walter",CA,71,43,200,1.551124248,0.281,0,0,0,1,68
94,2,14008,"BURKE, Yvonne Brathwaite",CA,71,28,100,-2.765581377,-0.576,0,0,1,0,37
94,2,14009,"COCHRAN, William Thad",MS,46,4,200,1.706323955,0.286,0,0,0,1,76
94,2,14010,"COHEN, William Sebastian",ME,2,2,200,-0.282790295,0.1,0,0,0,0,62
94,2,14011,"CONLAN, John Bertrand",AZ,61,4,200,2.538906568,0.531,0,0,0,1,71
94,2,14013,"DANIEL, Robert Williams, Jr.",VA,40,4,200,2.137041546,0.318,1,0,0,1,65
94,2,14015,"GILMAN, Benjamin Arthur",NY,13,26,200,0.293002283,0.043,0,1,0,1,68
94,2,14016,"GINN, Ronald Bryan (Bo)",GA,44,1,100,1.138702479,-0.217,0,0,0,0,75
94,2,14018,"GUYER, Tennyson",OH,24,4,200,0.718670856,0.217,0,1,0,0,71
94,2,14020,"HINSHAW, Andrew Jackson",CA,71,40,200,1.317274853,0.265,1,0,0,1,73
94,2,14021,"HOLT, Marjorie Sewell",MD,52,4,200,1.710575769,0.368,1,0,1,0,70
94,2,14022,"HOLTZMAN, Elizabeth",NY,13,16,100,-3.869306268,-0.493,0,0,1,0,46
94,2,14025,"JOHNSON, James Paul (Jim)",CO,62,4,200,-0.364475856,0.162,0,0,0,1,67
94,2,14026,"JONES, James Robert",OK,53,1,100,0.92750037,-0.095,0,0,0,1,79
94,2,14027,"JORDAN, Barbara Charline",TX,49,18,100,-1.570826697,-0.522,0,0,1,0,31
94,2,14028,"KETCHUM, William Matthew",CA,71,18,200,2.323160822,0.348,0,0,0,1,66
94,2,14029,"LEHMAN, William",FL,43,13,100,-1.68853663,-0.483,0,0,0,0,56
94,2,14030,"LITTON, Jerry Lon",MO,34,6,100,-0.52994791,-0.266,0,0,0,0,67
94,2,14031,"LOTT, Chester Trent",MS,46,5,200,2.483529399,0.39,0,0,0,0,87
94,2,14033,"MADIGAN, Edward Rell",IL,21,21,200,0.420176388,0.247,0,0,0,0,62
94,2,14035,"MARTIN, James Grubbs",NC,47,9,200,1.284049948,0.347,0,0,0,0,81
94,2,14036,"MEZVINSKY, Edward Maurice",IA,31,1,100,-3.19886899,-0.414,0,0,0,0,56
94,2,14037,"MILFORD, Dale",TX,49,24,100,1.246635087,0.012,0,0,0,1,60
94,2,14038,"MITCHELL, Donald Jerome",NY,13,31,200,0.535769773,0.097,1,0,0,1,70
94,2,14039,"MOAKLEY, John Joseph",MA,3,9,100,-1.710188071,-0.418,0,0,0,1,41
94,2,14040,"MOORHEAD, Carlos John",CA,71,22,200,2.109856155,0.465,0,0,0,1,68
94,2,14041,"O'BRIEN, George Miller",IL,21,17,200,0.696079354,0.169,1,0,0,1,66
94,2,14044,"PRITCHARD, Joel McFee",WA,73,1,200,-0.566531023,0.109,0,0,0,1,58
94,2,14045,"REGULA, Ralph Straus",OH,24,16,200,0.140780871,0.221,0,0,0,1,65
94,2,14046,"RINALDO, Matthew John",NJ,12,12,200,-0.216359748,0.023,0,0,0,0,63
94,2,14048,"ROSE, Charles Grandison, III",NC,47,7,100,0.522316547,-0.319,0,0,0,0,70
94,2,14049,"RYAN, Leo Joseph",CA,71,11,100,-1.785534461,-0.364,0,1,0,1,55
94,2,14050,"SARASIN, Ronald Arthur",CT,1,5,200,-0.200873991,0.133,0,0,0,0,62
94,2,14051,"SCHROEDER, Patricia Scott",CO,62,1,100,-1.970166425,-0.225,1,0,1,0,55
94,2,14052,"SHUSTER, E. G. (Bud)",PA,14,9,200,2.451470782,0.416,0,0,0,1,74
94,2,14053,"STARK, Fortney Hillman (Pete), Jr.",CA,71,9,100,-4.3935027,-0.631,0,0,0,1,50
94,2,14054,"STEELMAN, Alan Watson",TX,49,5,200,0.260291743,0.255,0,0,0,0,64
94,2,14055,"STUDDS, Gerry Eastman",MA,3,12,100,-2.117477061,-0.444,0,1,0,0,52
94,2,14056,"SYMMS, Steven Douglas",ID,63,1,200,4.157118782,0.687,0,0,0,1,69
94,2,14057,"TAYLOR, Gene",MO,34,7,200,2.814276751,0.328,0,0,0,0,73
94,2,14058,"THORNTON, Raymond Hoyt (Ray), Jr.",AR,42,4,100,0.652308598,-0.306,0,0,0,1,69
94,2,14060,"TREEN, David Conner",LA,45,3,200,1.467439486,0.34,1,0,0,1,76
94,2,14061,"WALSH, William Francis",NY,13,33,200,0.523257994,0.068,0,0,0,0,70
94,2,14062,"WILSON, Charles",TX,49,2,100,-0.375516033,-0.196,0,1,0,1,68
94,2,14063,"YOUNG, Andrew Jackson, Jr.",GA,44,5,100,-2.712582501,-0.589,0,0,0,0,52
94,2,14066,"YOUNG, Donald Edwin",AK,81,1,200,1.927842231,0.278,0,0,0,1,63
94,2,14067,"BOGGS, Corinne Claiborne (Lindy)",LA,45,2,100,-0.391860399,-0.359,0,0,1,0,60
94,2,14068,"COLLINS, Cardiss",IL,21,7,100,-2.400072054,-0.552,0,1,1,0,26
94,2,14069,"BAUMAN, Robert Edmund",MD,52,1,200,2.648368453,0.533,0,0,0,0,72
94,2,14071,"LAGOMARSINO, Robert John",CA,71,19,200,1.149456866,0.378,0,1,0,1,58
94,2,14072,"MURTHA, John Patrick, Jr.",PA,14,12,100,0.391212448,-0.265,0,0,0,1,64
94,2,14074,"VANDER VEEN, Richard Franklin",MI,23,5,100,-1.428925325,-0.364,0,0,0,1,61
94,2,14075,"TRAXLER, Jerome Bob",MI,23,8,100,-1.09264233,-0.33,0,0,0,1,62
94,2,14076,"BURTON, John Lowell",CA,71,5,100,-3.721224082,-0.413,0,0,0,0,46
94,2,14200,"AMBRO, Jerome Anthony, Jr.",NY,13,3,100,-0.679139272,-0.19,0,0,0,1,67
94,2,14201,"AuCOIN, Les",OR,72,1,100,-1.24241749,-0.231,0,0,0,1,57
94,2,14202,"BALDUS, Alvin James",WI,25,3,100,-1.342956467,-0.383,0,0,0,1,59
94,2,14203,"BAUCUS, Max Sieben",MT,64,1,100,-1.238578244,-0.212,0,0,0,0,58
94,2,14204,"BEARD, Edward Peter",RI,5,2,100,-1.380866773,-0.286,0,0,0,0,54
94,2,14205,"BEDELL, Berkley Warren",IA,31,6,100,-1.975551371,-0.24,0,0,0,1,62
94,2,14206,"BLANCHARD, James Johnston",MI,23,18,100,-1.062355181,-0.352,0,0,0,0,63
94,2,14207,"BLOUIN, Michael Thomas",IA,31,2,100,-2.095045207,-0.288,0,0,0,0,56
94,2,14208,"BONKER, Don Leroy",WA,73,3,100,-1.37720064,-0.336,0,1,0,1,58
94,2,14209,"BRODHEAD, William McNulty",MI,23,17,100,-2.521741523,-0.463,0,0,0,0,60
94,2,14210,"CARR, Milton Robert (Bob)",MI,23,6,100,-2.2612984,-0.254,1,0,0,0,59
94,2,14211,"CORNELL, Robert John",WI,25,8,100,-1.724200858,-0.324,0,0,0,0,61
94,2,14212,"DERRICK, Butler Carson, Jr.",SC,48,3,100,0.271147623,-0.215,0,0,0,0,77
94,2,14213,"DODD, Christopher John",CT,1,2,100,-1.568616694,-0.328,0,0,0,1,60
94,2,14214,"DOWNEY, Thomas Joseph",NY,13,2,100,-1.326143099,-0.384,1,0,0,0,72
94,2,14215,"FISHER, Joseph Lyman",VA,40,10,100,-1.071867362,-0.298,0,0,0,1,64
94,2,14216,"EARLY, Joseph Daniel",MA,3,3,100,-2.105229466,-0.254,0,0,0,1,50
94,2,14217,"EDGAR, Robert William",PA,14,7,100,-2.082176141,-0.334,0,0,0,0,64
94,2,14218,"EMERY, David Farnham",ME,2,1,200,0.409471373,0.155,0,0,0,0,61
94,2,14219,"ENGLISH, Glenn Lee, Jr.",OK,53,6,100,1.274200359,-0.027,0,0,0,0,79
94,2,14220,"EVANS, David Walter",IN,22,6,100,0.025250219,-0.054,0,0,0,0,74
94,2,14221,"FENWICK, Millicent Hammond",NJ,12,5,200,-0.810372742,0.134,0,0,1,0,66
94,2,14222,"FITHIAN, Floyd James",IN,22,2,100,-0.341418492,-0.165,0,0,0,1,74
94,2,14223,"FLORIO, James Joseph",NJ,12,1,100,-0.633235846,-0.318,0,0,0,1,60
94,2,14224,"FORD, Harold Eugene",TN,54,8,100,-1.595418599,-0.438,0,0,0,0,57
94,2,14225,"GRADISON, Willis David, Jr.",OH,24,1,200,0.239730303,0.233,0,0,0,0,66
94,2,14226,"GRASSLEY, Charles Ernest",IA,31,3,200,1.067027241,0.341,0,0,0,0,60
94,2,14227,"HAGEDORN, Thomas Michael",MN,33,2,200,1.259120572,0.308,0,0,0,1,59
94,2,14228,"HALL, Tim Lee",IL,21,15,100,-0.777023762,-0.36,0,0,0,1,66
94,2,14229,"HANNAFORD, Mark Warren",CA,71,34,100,-1.386245894,-0.295,0,0,0,1,66
94,2,14230,"HARKIN, Thomas Richard (Tom)",IA,31,5,100,-2.134063588,-0.351,0,0,0,1,63
94,2,14231,"HARRIS, Herbert Eugene, II",VA,40,8,100,-1.297905265,-0.324,0,0,0,0,67
94,2,14232,"HAYES, Philip Harold",IN,22,8,100,-1.541748955,-0.384,0,0,0,0,65
94,2,14233,"HEFNER, Willie Gathrel (Bill)",NC,47,8,100,0.743234409,-0.264,0,0,0,0,73
94,2,14234,"HIGHTOWER, Jack English",TX,49,13,100,1.027035744,-0.115,0,0,0,1,76
94,2,14235,"HOLLAND, Kenneth Lamar",SC,48,5,100,-0.422329775,-0.246,0,0,0,0,71
94,2,14236,"HOWE, Allan Turner",UT,67,2,100,-0.940318239,-0.309,0,0,0,1,67
94,2,14237,"HUBBARD, Carroll, Jr.",KY,51,1,100,1.317340216,-0.038,0,0,0,0,63
94,2,14238,"HUGHES, William John",NJ,12,2,100,-0.502815512,-0.153,0,0,0,0,66
94,2,14239,"HYDE, Henry John",IL,21,6,200,0.851837653,0.312,0,0,0,1,69
94,2,14240,"JEFFORDS, James Merrill",VT,6,1,200,-0.387160494,0.014,0,0,0,1,63
94,2,14241,"JENRETTE, John Wilson, Jr.",SC,48,6,100,0.372601531,-0.316,0,0,0,0,68
94,2,14242,"KASTEN, Robert Walter, Jr.",WI,25,9,200,0.899899655,0.261,0,0,0,1,63
94,2,14243,"KELLY, Richard",FL,43,5,200,2.689140769,0.504,0,0,0,1,76
94,2,14244,"KEYS, Martha Elizabeth",KS,32,2,100,-1.719005456,-0.231,0,0,1,0,70
94,2,14245,"KINDNESS, Thomas Norman",OH,24,8,200,2.17119186,0.419,0,0,0,0,69
94,2,14246,"KREBS, John Hans",CA,71,17,100,-1.058662261,-0.279,0,0,0,1,58
94,2,14247,"KRUEGER, Robert Charles",TX,49,21,100,0.147200367,-0.117,0,0,0,0,76
94,2,14248,"LaFALCE, John Joseph",NY,13,36,100,-0.99785725,-0.357,0,0,0,1,60
94,2,14249,"LEVITAS, Elliott Harris",GA,44,4,100,0.197130648,-0.056,0,0,0,1,77
94,2,14250,"LLOYD, James Fredrick",CA,71,35,100,-0.423010907,-0.218,1,0,0,1,66
94,2,14251,"LLOYD, Marilyn Laird",TN,54,3,100,1.567046928,-0.058,0,0,1,0,72
94,2,14252,"McDONALD, Lawrence Patton",GA,44,7,100,3.792484065,0.884,1,0,0,1,83
94,2,14253,"McHUGH, Matthew Francis",NY,13,27,100,-1.868351794,-0.353,0,0,0,0,64
94,2,14254,"MAGUIRE, Gene Andrew",NJ,12,7,100,-2.658478815,-0.338,0,0,0,0,66
94,2,14255,"MEYNER, Helen Stevenson",NJ,12,13,100,-2.364064724,-0.411,0,1,1,0,70
94,2,14256,"MILLER, George",CA,71,7,100,-2.347919995,-0.552,0,0,0,0,53
94,2,14257,"MINETA, Norman Y.",CA,71,13,100,-2.008542207,-0.479,0,0,0,1,58
94,2,14258,"MOFFETT, Anthony John, Jr. (Toby)",CT,1,6,100,-2.273856791,-0.377,0,0,0,0,58
94,2,14259,"MOORE, William Henson, III",LA,45,6,200,1.636574798,0.24,0,0,0,1,70
94,2,14260,"MOTTL, Ronald Milton",OH,24,23,100,-0.544444597,0.021,0,0,0,0,65
94,2,14261,"MYERS, Gary Arthur",PA,14,25,200,-0.045374158,0.291,0,0,0,1,60
94,2,14262,"NEAL, Stephen Lybrook",NC,47,5,100,-0.054590083,-0.145,0,0,0,0,71
94,2,14263,"NOLAN, Richard Michael",MN,33,6,100,-1.960256324,-0.371,0,0,0,0,53
94,2,14264,"NOWAK, Henry James",NY,13,37,100,-1.310167906,-0.332,0,0,0,1,43
94,2,14265,"OBERSTAR, James Louis",MN,33,8,100,-2.139025854,-0.553,0,0,0,0,45
94,2,14266,"PATTERSON, Jerry Mumford",CA,71,38,100,-1.222053887,-0.367,0,0,0,1,68
94,2,14267,"PATTISON, Edward Worthington",NY,13,29,100,-2.120013348,-0.323,0,0,0,1,70
94,2,14268,"PRESSLER, Larry Lee",SD,37,1,200,0.226433391,0.213,0,0,0,1,51
94,2,14269,"RICHMOND, Frederick William",NY,13,14,100,-3.889306065,-0.564,0,0,0,1,NA
94,2,14270,"RISENHOOVER, Theodore Marshall",OK,53,2,100,0.450339236,-0.214,0,0,0,1,73
94,2,14271,"RUSSO, Martin Anthony",IL,21,3,100,-0.49245542,-0.192,0,0,0,0,70
94,2,14272,"SANTINI, James David",NV,65,1,100,0.161136902,-0.074,0,0,0,1,64
94,2,14273,"SCHULZE, Richard Taylor",PA,14,5,200,1.105707853,0.271,1,0,0,1,69
94,2,14274,"SHARP, Philip Riley",IN,22,10,100,-0.996060581,-0.166,0,0,0,0,69
94,2,14275,"SIMON, Paul Martin",IL,21,24,100,-1.513320712,-0.397,0,0,0,0,60
94,2,14276,"SMITH, Virginia Dodd",NE,35,3,200,1.520661642,0.238,0,0,1,0,76
94,2,14277,"SOLARZ, Stephen Joshua",NY,13,13,100,-2.304557137,-0.429,0,1,0,0,NA
94,2,14278,"SPELLMAN, Gladys Noon",MD,52,5,100,-1.21622699,-0.308,0,0,1,0,57
94,2,14279,"TSONGAS, Paul Efthemios",MA,3,5,100,-2.431877973,-0.383,0,0,0,0,47
94,2,14280,"WAXMAN, Henry Arnold",CA,71,24,100,-2.119619765,-0.473,0,0,0,0,49
94,2,14281,"WEAVER, James Howard",OR,72,4,100,-2.06440569,-0.311,0,0,0,1,56
94,2,14282,"WIRTH, Timothy E.",CO,62,2,100,-1.882402258,-0.293,0,0,0,0,65
94,2,14283,"ZEFERETTI, Leo C.",NY,13,15,100,0.004672506,-0.305,0,0,0,1,NA
94,2,14284,"D'AMOURS, Norman Edward",NH,4,1,100,-0.561098222,-0.17,0,0,0,0,67
94,2,14286,"ALLEN, Clifford Robertson",TN,54,5,100,-0.460488656,-0.257,0,0,0,0,63
94,2,14286,"ALLEN, Clifford Robertson",TN,54,5,100,-0.460488656,-0.257,0,0,0,0,63
94,2,14287,"PETTIS, Shirley Neil",CA,71,37,200,1.067935199,0.209,0,0,1,0,66
94,2,14287,"PETTIS, Shirley Neil",CA,71,37,200,1.067935199,0.209,0,0,1,0,66
94,2,14288,"GOODLING, William Franklin",PA,14,19,200,1.095006444,0.336,0,0,0,1,72
94,2,14289,"LUNDINE, Stanley Nelson",NY,13,39,100,-1.743415389,-0.31,0,0,0,0,66
94,2,14289,"LUNDINE, Stanley Nelson",NY,13,39,100,-1.743415389,-0.31,0,0,0,0,66
94,2,14290,"PAUL, Ronald Ernest",TX,49,22,200,1.868674966,0.863,0,0,0,1,65
94,2,14290,"PAUL, Ronald Ernest",TX,49,22,200,1.868674966,0.863,0,0,0,1,65
94,2,14291,"HALL, Sam Blakeley, Jr.",TX,49,1,100,2.17087126,0.054,0,0,0,1,70
94,2,14291,"HALL, Sam Blakeley, Jr.",TX,49,1,100,2.17087126,0.054,0,0,0,1,70
94,2,93033,"PEYSER, Peter A.",NY,13,23,200,-0.307786211,-0.055,0,0,0,1,61
94,2,94891,"JARMAN, John",OK,53,5,200,1.205518523,0.206,0,0,0,1,76
95,3,267,"ASHLEY, Thomas William Ludlow",OH,24,9,100,-1.319696273,-0.35,0,0,0,1,41
95,3,633,"BENNETT, Charles Edward",FL,43,3,100,1.043058897,-0.088,1,0,0,1,36
95,3,830,"BOLAND, Edward Patrick",MA,3,2,100,-1.399335432,-0.306,0,0,0,1,39
95,3,835,"BOLLING, Richard Walker",MO,34,5,100,-1.466715194,-0.504,0,0,0,1,41
95,3,948,"BRADEMAS, John",IN,22,3,100,-2.064804149,-0.462,0,0,0,1,54
95,3,1077,"BROOKS, Jack Bascom",TX,49,9,100,-0.059394196,-0.407,0,0,0,1,41
95,3,1087,"BROOMFIELD, William S.",MI,23,19,200,0.149764396,0.227,0,1,0,0,63
95,3,1265,"BURKE, James Anthony",MA,3,11,100,-0.697462037,-0.4,0,0,0,1,41
95,3,1282,"BURLESON, Omar Truman",TX,49,17,100,2.067798423,0.002,0,0,0,1,43
95,3,1610,"CEDERBERG, Elford Albin",MI,23,10,200,0.422452237,0.27,0,0,0,1,59
95,3,2009,"CONTE, Silvio Ottavio",MA,3,1,200,-1.315833868,-0.023,0,0,0,1,42
95,3,2476,"DELANEY, James Joseph",NY,13,9,100,-0.714440902,-0.303,0,0,0,0,54
95,3,2513,"DENT, John Herman",PA,14,21,100,0.431210713,-0.384,0,0,0,1,46
95,3,2525,"DERWINSKI, Edward Joseph",IL,21,4,200,0.11614594,0.342,0,1,0,1,62
95,3,2533,"DEVINE, Samuel Leeper",OH,24,12,200,2.736026991,0.502,0,0,0,0,56
95,3,2594,"DIGGS, Charles Coles, Jr.",MI,23,13,100,-2.468589076,-0.539,0,1,0,1,11
95,3,2605,"DINGELL, John David, Jr.",MI,23,16,100,-0.977107679,-0.448,0,0,0,1,45
95,3,3078,"FASCELL, Dante Bruno",FL,43,15,100,-1.598928373,-0.4,0,1,0,1,46
95,3,3224,"FLOOD, Daniel John",PA,14,11,100,-0.651599727,-0.377,0,0,0,0,46
95,3,3242,"FLYNT, John James, Jr.",GA,44,6,100,2.001521025,0,0,0,0,1,32
95,3,3321,"FOUNTAIN, Lawrence H.",NC,47,2,100,0.981854131,-0.041,0,1,0,1,39
95,3,3553,"GIAIMO, Robert Nicholas",CT,1,3,100,-1.733727925,-0.318,0,0,0,1,54
95,3,4957,"JOHNSON, Harold Terry",CA,71,1,100,-0.801821538,-0.439,0,0,0,0,49
95,3,5101,"KASTENMEIER, Robert William",WI,25,2,100,-2.782413907,-0.514,0,0,0,1,47
95,3,5495,"LATTA, Delbert Leroy",OH,24,5,200,2.331433598,0.391,0,0,0,0,55
95,3,5924,"MAHON, George Herman",TX,49,19,100,0.138873036,-0.168,0,0,0,0,58
95,3,6240,"McFALL, John Joseph",CA,71,14,100,-1.282355386,-0.468,0,0,0,1,50
95,3,6455,"MICHEL, Robert Henry",IL,21,18,200,0.906801667,0.372,0,0,0,1,56
95,3,6584,"MOLLOHAN, Robert Homer",WV,56,1,100,-0.172339555,-0.349,1,0,0,0,44
95,3,6661,"MOORHEAD, William Singer",PA,14,14,100,-1.823436992,-0.416,0,0,0,1,41
95,3,6756,"MOSS, John Emerson",CA,71,3,100,-1.588399246,-0.582,0,0,0,1,47
95,3,6845,"NATCHER, William Huston",KY,51,2,100,-0.087845793,-0.288,0,0,0,1,45
95,3,6936,"NIX, Robert Nelson Cornelius, Sr.",PA,14,2,100,-1.370730341,-0.536,0,1,0,0,20
95,3,7081,"O'NEILL, Thomas Philip, Jr. (Tip)",MA,3,8,100,-1.603437168,-0.402,0,0,0,0,35
95,3,7333,"PEPPER, Claude Denson",FL,43,14,100,-0.886278814,-0.422,0,0,0,0,44
95,3,7343,"PERKINS, Carl Dewey",KY,51,7,100,-0.587619449,-0.343,0,0,0,1,39
95,3,7498,"POAGE, William Robert",TX,49,11,100,1.817446492,-0.082,0,0,0,1,43
95,3,7610,"PRICE, Charles Melvin",IL,21,23,100,-1.032389356,-0.429,1,0,0,1,41
95,3,7671,"QUIE, Albert Harold",MN,33,1,200,-0.336101613,0.189,0,0,0,1,49
95,3,7824,"REUSS, Henry Schoellkopf",WI,25,5,100,-2.543328229,-0.481,0,0,0,1,37
95,3,7845,"RHODES, John Jacob",AZ,61,1,200,0.57518403,0.225,0,0,0,1,61
95,3,8010,"RODINO, Peter Wallace, Jr.",NJ,12,10,100,-2.362410934,-0.435,0,0,0,1,27
95,3,8032,"ROGERS, Paul Grant",FL,43,11,100,-0.049201526,-0.085,0,0,0,1,50
95,3,8080,"ROSTENKOWSKI, Daniel David",IL,21,8,100,-1.13841257,-0.39,0,0,0,1,30
95,3,8474,"SHIPLEY, George Edward",IL,21,22,100,-0.171063806,-0.284,0,0,0,1,51
95,3,8507,"SIKES, Robert Lee Fulton",FL,43,1,100,1.698110684,-0.128,0,0,0,1,51
95,3,8549,"SISK, Bernice Frederic",CA,71,15,100,-0.098040943,-0.388,0,0,0,0,45
95,3,8564,"SLACK, John Mark, Jr.",WV,56,3,100,0.14017572,-0.281,0,0,0,0,42
95,3,8672,"SMITH, Neal Edward",IA,31,4,100,-1.0257908,-0.313,0,0,0,1,46
95,3,8824,"STAGGERS, Harley Orrin",WV,56,2,100,-0.25664274,-0.345,0,0,0,1,44
95,3,8866,"STEED, Thomas Jefferson",OK,53,4,100,0.049275019,-0.279,0,0,0,1,NA
95,3,9017,"STRATTON, Samuel Studdiford",NY,13,28,100,0.649984932,-0.139,1,0,0,1,51
95,3,9241,"TEAGUE, Olin Earl",TX,49,6,100,2.008119611,-0.102,0,0,0,1,NA
95,3,9322,"THOMPSON, Frank, Jr.",NJ,12,4,100,-2.90222215,-0.511,0,0,0,1,46
95,3,9551,"ULLMAN, Albert Conrad",OR,72,2,100,-1.170735539,-0.367,0,0,0,1,51
95,3,9623,"VANIK, Charles Albert",OH,24,22,100,-2.143957393,-0.366,0,0,0,1,50
95,3,9802,"WAMPLER, William Creed",VA,40,9,200,1.354126552,0.146,0,0,0,1,47
95,3,10075,"WHITTEN, Jamie Lloyd",MS,46,1,100,1.139360563,-0.161,0,0,0,0,38
95,3,10249,"WILSON, Robert Carlton (Bob)",CA,71,41,200,0.811247196,0.264,1,0,0,1,57
95,3,10391,"WRIGHT, James Claude, Jr.",TX,49,12,100,-1.048596916,-0.383,0,0,0,1,44
95,3,10421,"YATES, Sidney Richard",IL,21,9,100,-2.571340476,-0.494,0,0,0,1,42
95,3,10446,"YOUNG, John Andrew",TX,49,14,100,-0.211573369,-0.342,0,0,0,0,42
95,3,10463,"ZABLOCKI, Clement John",WI,25,4,100,-0.936488112,-0.355,0,1,0,0,45
95,3,10500,"ADDABBO, Joseph Patrick",NY,13,7,100,-1.561792814,-0.402,0,0,0,0,27
95,3,10501,"ANDERSON, John Bayard",IL,21,16,200,-0.960475607,0.183,0,0,0,1,59
95,3,10502,"ASHBROOK, John Milan",OH,24,17,200,3.345007907,0.612,0,0,0,1,54
95,3,10511,"CORMAN, James Charles",CA,71,21,100,-1.784723844,-0.53,0,0,0,1,48
95,3,10517,"FINDLEY, Paul",IL,21,20,200,-0.563133528,0.246,0,1,0,1,53
95,3,10520,"GONŹLEZ, Henry B.",TX,49,20,100,-0.356537282,-0.538,0,0,0,0,26
95,3,10525,"HARSHA, William Howard",OH,24,6,200,1.932434427,0.188,0,0,0,1,51
95,3,10528,"ICHORD, Richard Howard, II",MO,34,8,100,2.26222184,0.001,1,0,0,0,53
95,3,10540,"NEDZI, Lucien Norbert",MI,23,14,100,-1.390623337,-0.427,1,0,0,1,51
95,3,10545,"PIKE, Otis Grey",NY,13,1,100,-0.645387042,-0.162,0,0,0,1,54
95,3,10550,"ROBERTS, Herbert Ray",TX,49,4,100,1.293580899,-0.131,0,0,0,1,49
95,3,10551,"ROSENTHAL, Benjamin Stanley",NY,13,8,100,-2.949663781,-0.562,0,1,0,1,33
95,3,10553,"ROUSSELOT, John Harbin",CA,71,26,200,3.311724665,0.601,0,0,0,0,62
95,3,10561,"ST. GERMAIN, Fernand Joseph",RI,5,1,100,-1.285746114,-0.355,0,0,0,1,43
95,3,10566,"UDALL, Morris King",AZ,61,2,100,-1.924391365,-0.387,0,0,0,1,52
95,3,10567,"WAGGONNER, Joseph David, Jr.",LA,45,4,100,2.028799253,0.015,0,0,0,1,54
95,3,10569,"ANDREWS, Mark",ND,36,1,200,1.018516615,0.087,0,0,0,1,53
95,3,10573,"BROWN, George Edward, Jr.",CA,71,36,100,-2.253440429,-0.506,0,0,0,1,44
95,3,10574,"BROYHILL, James Thomas",NC,47,10,200,0.98748479,0.269,0,0,0,0,46
95,3,10577,"BURTON, Phillip",CA,71,6,100,-3.77584375,-0.634,0,0,0,1,43
95,3,10579,"CLAUSEN, Donald Holst",CA,71,2,200,1.469794126,0.16,0,0,0,1,49
95,3,10580,"CLAWSON, Delwin Morgan",CA,71,33,200,2.75249616,0.483,0,0,0,0,57
95,3,10581,"CLEVELAND, James Colgate",NH,4,2,200,0.850977955,0.218,0,0,0,1,NA
95,3,10582,"DUNCAN, Robert Blackford",OR,72,3,100,-0.942009395,-0.341,0,0,0,1,44
95,3,10583,"EDWARDS, William Donlon (Don)",CA,71,10,100,-3.374717452,-0.599,0,0,0,1,41
95,3,10585,"FRASER, Donald MacKay",MN,33,5,100,-2.880084314,-0.469,0,1,0,1,36
95,3,10587,"FUQUA, Don",FL,43,2,100,0.767723493,-0.173,0,0,0,1,37
95,3,10588,"GIBBONS, Sam Melville",FL,43,7,100,-0.428346295,-0.233,0,0,0,1,46
95,3,10595,"HAWKINS, Augustus Freeman (Gus)",CA,71,29,100,-2.110178193,-0.517,0,0,0,0,19
95,3,10596,"HORTON, Frank Jefferson",NY,13,34,200,-0.314049869,-0.004,0,0,0,1,56
95,3,10599,"LEGGETT, Robert Louis",CA,71,4,100,-1.253157572,-0.468,1,0,0,1,44
95,3,10601,"LONG, Clarence Dickinson",MD,52,2,100,-0.68853352,-0.274,0,0,0,1,52
95,3,10602,"LONG, Gillis William",LA,45,8,100,-0.689943954,-0.368,0,0,0,1,38
95,3,10606,"McCLORY, Robert",IL,21,13,200,0.034897645,0.256,0,0,0,1,63
95,3,10607,"McDADE, Joseph Michael",PA,14,10,200,0.094798215,0.093,0,0,0,0,51
95,3,10609,"MINISH, Joseph George",NJ,12,11,100,-0.752076519,-0.299,0,0,0,1,51
95,3,10611,"MURPHY, John Michael",NY,13,17,100,-0.617302839,-0.406,0,0,0,1,45
95,3,10613,"PATTEN, Edward James",NJ,12,15,100,-1.154745327,-0.424,0,0,0,0,46
95,3,10614,"PICKLE, James Jarrell (Jake)",TX,49,10,100,0.163446451,-0.218,0,0,0,1,46
95,3,10616,"QUILLEN, James Henry",TN,54,1,200,2.180917593,0.246,0,0,0,1,54
95,3,10620,"ROONEY, Frederick Bernard",PA,14,15,100,-1.039836464,-0.35,0,0,0,1,47
95,3,10621,"ROYBAL, Edward R.",CA,71,25,100,-2.487370295,-0.61,0,0,0,1,37
95,3,10625,"SKUBITZ, Joe",KS,32,5,200,0.386181877,0.189,0,0,0,0,51
95,3,10626,"SNYDER, Marion Gene",KY,51,4,200,2.802692391,0.26,0,0,0,0,57
95,3,10633,"VAN DEERLIN, Lionel",CA,71,42,100,-1.245654273,-0.401,0,0,0,1,47
95,3,10638,"WYDLER, John Waldemar",NY,13,5,200,0.607307052,0.277,0,0,0,1,52
95,3,10640,"WILSON, Charles Herbert",CA,71,31,100,0.150682952,-0.39,1,0,0,1,34
95,3,10703,"ANNUNZIO, Frank",IL,21,11,100,-0.892767291,-0.398,0,0,0,0,52
95,3,10705,"BINGHAM, Jonathan Brewster",NY,13,22,100,-2.52731817,-0.509,0,1,0,1,23
95,3,10706,"BUCHANAN, John Hall, Jr.",AL,41,6,200,-0.411525666,0.146,0,1,0,1,56
95,3,10710,"CARTER, Tim Lee",KY,51,5,200,1.044287322,0.08,0,0,0,1,57
95,3,10712,"CONABLE, Barber Benjamin, Jr.",NY,13,35,200,-0.346557086,0.371,0,0,0,1,57
95,3,10713,"CONYERS, John, Jr.",MI,23,1,100,-2.828886217,-0.658,0,0,0,1,9
95,3,10716,"de la GARZA, Eligio, II (Kika)",TX,49,15,100,0.605095076,-0.255,0,1,0,1,34
95,3,10717,"DICKINSON, William Louis",AL,41,2,200,1.855922618,0.398,1,0,0,1,46
95,3,10719,"DUNCAN, John James",TN,54,2,200,1.77240822,0.194,0,0,0,1,51
95,3,10721,"EDWARDS, William Jackson (Jack)",AL,41,1,200,0.760562541,0.177,0,0,0,1,51
95,3,10722,"ERLENBORN, John Neal",IL,21,14,200,-0.317510248,0.315,0,0,0,1,71
95,3,10723,"EVANS, Frank Edward",CO,62,3,100,-1.603320306,-0.331,0,0,0,1,51
95,3,10726,"FOLEY, Thomas Stephen",WA,73,5,100,-1.226947646,-0.354,0,0,0,0,NA
95,3,10727,"FORD, William David",MI,23,15,100,-1.753514704,-0.516,0,0,0,1,47
95,3,10732,"HAMILTON, Lee Herbert",IN,22,9,100,-1.345276564,-0.171,0,1,0,0,49
95,3,10733,"HANLEY, James Michael",NY,13,32,100,-0.92083066,-0.306,0,0,0,1,61
95,3,10734,"HANSEN, George Vernon",ID,63,2,200,4.826676433,0.621,0,0,0,1,64
95,3,10739,"HOWARD, James John",NJ,12,3,100,-1.504350352,-0.431,0,0,0,1,56
95,3,10742,"JACOBS, Andrew, Jr.",IN,22,11,100,-0.77087225,-0.07,0,0,0,1,55
95,3,10749,"McEWEN, Robert Cameron",NY,13,30,200,0.560314301,0.234,0,0,0,1,58
95,3,10756,"MEEDS, Edwin Lloyd",WA,73,2,100,-1.483256169,-0.453,0,0,0,1,NA
95,3,10760,"OTTINGER, Richard Lawrence",NY,13,24,100,-3.043739318,-0.391,0,0,0,0,53
95,3,10766,"RONCALIO, Teno",WY,68,1,100,-1.209982707,-0.457,0,0,0,1,60
95,3,10767,"SATTERFIELD, David Edward, III",VA,40,3,100,3.284992353,0.265,0,0,0,1,57
95,3,10768,"SCHEUER, James Haas",NY,13,11,100,-2.184665167,-0.478,0,0,0,1,30
95,3,10773,"STANTON, John William",OH,24,11,200,-0.213896531,0.135,0,0,0,1,48
95,3,10783,"WHITE, Richard Crawford",TX,49,16,100,1.027064831,-0.137,1,0,0,1,NA
95,3,10784,"WOLFF, Lester Lionel",NY,13,6,100,-0.888041502,-0.264,0,1,0,1,50
95,3,10786,"BROWN, Clarence J., Jr.",OH,24,7,200,1.006845147,0.3,0,0,0,1,54
95,3,10788,"JONES, Walter Beaman, Sr.",NC,47,1,100,0.477612443,-0.259,0,0,0,0,40
95,3,10794,"VANDER JAGT, Guy Adrian",MI,23,9,200,0.724015627,0.247,0,0,0,0,64
95,3,11000,"BEVILL, Tom",AL,41,4,100,1.431016642,-0.213,0,0,0,1,35
95,3,11005,"BRINKLEY, Jack Thomas",GA,44,3,100,0.929309112,-0.073,1,0,0,1,31
95,3,11006,"BROWN, Garry Eldridge",MI,23,3,200,0.237484584,0.302,0,0,0,1,60
95,3,11007,"BURKE, J. Herbert",FL,43,12,200,1.07744131,0.241,0,1,0,1,47
95,3,11013,"ECKHARDT, Robert Christian",TX,49,8,100,-2.304864355,-0.547,0,0,0,1,37
95,3,11014,"EILBERG, Joshua",PA,14,4,100,-0.975154852,-0.443,0,0,0,1,43
95,3,11020,"HAMMERSCHMIDT, John Paul",AR,42,3,200,1.976586672,0.253,0,0,0,1,44
95,3,11021,"HECKLER, Margaret M.",MA,3,10,200,-0.66776362,-0.007,0,0,1,0,44
95,3,11023,"KAZEN, Abraham, Jr.",TX,49,23,100,1.019638542,-0.219,1,0,0,1,41
95,3,11034,"MILLER, Clarence E.",OH,24,10,200,1.146685862,0.416,0,0,0,0,51
95,3,11035,"MONTGOMERY, Gillespie V. (Sonny)",MS,46,3,100,1.580406769,0.017,1,0,0,1,51
95,3,11036,"MYERS, John Thomas",IN,22,7,200,1.909206962,0.236,0,0,0,1,63
95,3,11037,"NICHOLS, William Flynt",AL,41,3,100,1.601246973,-0.042,1,0,0,1,40
95,3,11041,"RAILSBACK, Thomas Fisher",IL,21,19,200,-0.45088702,0.103,0,0,0,1,54
95,3,11045,"RUPPE, Philip Edward",MI,23,11,200,-0.102720945,0.169,0,0,0,1,51
95,3,11051,"STEIGER, William Albert",WI,25,6,200,-0.390139882,0.336,0,0,0,0,52
95,3,11054,"WHALEN, Charles William, Jr.",OH,24,3,200,-1.957644063,-0.139,0,1,0,1,48
95,3,11055,"WIGGINS, Charles Edward",CA,71,39,200,0.489379154,0.359,0,0,0,1,64
95,3,11057,"WINN, Edward Lawrence, Jr. (Larry)",KS,32,3,200,0.51836678,0.247,0,1,0,0,58
95,3,11058,"WYLIE, Chalmers Pangburn",OH,24,15,200,0.177900546,0.23,0,0,0,1,59
95,3,11063,"McCLOSKEY, Paul Norton , Jr. (Pete)",CA,71,12,200,-1.396112808,0.028,0,0,0,1,53
95,3,11066,"COLLINS, James Mitchell",TX,49,3,200,2.479797279,0.679,0,0,0,1,NA
95,3,11067,"GAYDOS, Joseph Matthew",PA,14,20,100,0.140458623,-0.278,0,0,0,1,45
95,3,12000,"ALEXANDER, William Vollie (Bill), Jr.",AR,42,1,100,-0.647149073,-0.41,0,0,0,1,30
95,3,12001,"ANDERSON, Glenn Malcolm",CA,71,32,100,-0.490918858,-0.269,0,0,0,1,45
95,3,12003,"BIAGGI, Mario",NY,13,10,100,-0.713667762,-0.339,0,0,0,0,43
95,3,12004,"BURLISON, Bill D.",MO,34,10,100,-1.153641822,-0.475,0,0,0,1,43
95,3,12007,"CHAPPELL, William Venroe, Jr.",FL,43,4,100,1.371240525,-0.098,0,0,0,1,47
95,3,12008,"CHISHOLM, Shirley Anita",NY,13,12,100,-3.382785559,-0.605,0,0,1,0,18
95,3,12009,"CLAY, William Lacy, Sr.",MO,34,1,100,-3.514768932,-0.49,0,0,0,1,29
95,3,12010,"COUGHLIN, Robert Lawrence",PA,14,13,200,-0.181569812,0.204,0,0,0,1,57
95,3,12011,"DANIEL, Wilbur Clarence (Dan)",VA,40,5,100,2.197909477,0.161,1,0,0,1,52
95,3,12013,"FISH, Hamilton, Jr.",NY,13,25,200,0.01267187,0.07,0,0,0,1,58
95,3,12014,"FLOWERS, Walter",AL,41,7,100,0.626497058,-0.147,0,0,0,1,43
95,3,12015,"FREY, Louis, Jr.",FL,43,9,200,1.791839833,0.244,0,0,0,1,54
95,3,12019,"KOCH, Edward Irving",NY,13,18,100,-2.994707938,-0.464,0,0,0,1,37
95,3,12019,"KOCH, Edward Irving",NY,13,18,100,-2.994707938,-0.464,0,0,0,1,37
95,3,12022,"LUJ́N, Manuel, Jr.",NM,66,1,200,1.277667472,0.272,0,0,0,0,51
95,3,12023,"MANN, James Robert",SC,48,4,100,0.126964856,-0.032,0,0,0,1,48
95,3,12025,"MIKVA, Abner Joseph",IL,21,10,100,-3.149865469,-0.441,0,0,0,1,61
95,3,12027,"PREYER, Lunsford Richardson",NC,47,6,100,-0.925830376,-0.27,0,0,0,1,47
95,3,12029,"SEBELIUS, Keith George",KS,32,1,200,1.047727391,0.277,0,0,0,1,54
95,3,12030,"STOKES, Louis",OH,24,21,100,-3.539680105,-0.578,0,0,0,1,14
95,3,12033,"WHITEHURST, George William",VA,40,2,200,1.261567261,0.233,1,0,0,1,49
95,3,12035,"YATRON, Gus",PA,14,6,100,-0.139192838,-0.174,0,1,0,0,50
95,3,12036,"OBEY, David Ross",WI,25,7,100,-2.284276614,-0.45,0,0,0,0,44
95,3,12037,"GOLDWATER, Barry Morris, Jr.",CA,71,20,200,1.811334078,0.355,0,0,0,0,60
95,3,12038,"JONES, Ed",TN,54,7,100,0.655174101,-0.245,0,0,0,0,42
95,3,12040,"HARRINGTON, Michael Joseph",MA,3,6,100,-3.197107424,-0.477,0,1,0,0,45
95,3,12041,"CRANE, Philip Miller",IL,21,12,200,3.614121594,0.739,0,0,0,1,69
95,3,12042,"ROE, Robert A.",NJ,12,8,100,-0.705964046,-0.326,0,0,0,1,52
95,3,12044,"CARNEY, Charles Joseph",OH,24,19,100,-0.856706057,-0.479,0,0,0,0,38
95,3,12046,"FORSYTHE, Edwin Bell",NJ,12,6,200,-1.129960934,0.326,0,0,0,0,52
95,3,13002,"ARCHER, William Reynolds, Jr.",TX,49,7,200,2.301466906,0.496,0,0,0,1,74
95,3,13003,"ASPIN, Leslie",WI,25,1,100,-2.057218928,-0.32,1,0,0,1,50
95,3,13004,"BADILLO, Herman",NY,13,21,100,-3.445529138,-0.599,0,0,0,0,9
95,3,13004,"BADILLO, Herman",NY,13,21,100,-3.445529138,-0.599,0,0,0,0,9
95,3,13008,"BYRON, Goodloe Edgar",MD,52,6,100,2.001208931,-0.014,1,0,0,1,55
95,3,13009,"COTTER, William Ross",CT,1,1,100,-1.157177777,-0.313,0,0,0,0,47
95,3,13010,"DANIELSON, George Elmore",CA,71,30,100,-1.308414653,-0.477,0,1,0,1,40
95,3,13011,"DELLUMS, Ronald V.",CA,71,8,100,-2.930183334,-0.644,1,0,0,1,41
95,3,13013,"DRINAN, Robert Frederick",MA,3,4,100,-3.005351034,-0.422,0,0,0,0,43
95,3,13015,"FRENZEL, William Eldridge",MN,33,3,200,-0.150036455,0.353,0,0,0,1,51
95,3,13018,"HILLIS, Elwood Haynes",IN,22,5,200,0.98207883,0.173,1,0,0,1,57
95,3,13020,"KEMP, Jack French",NY,13,38,200,1.55376289,0.3,0,0,0,1,55
95,3,13021,"LENT, Norman Frederick",NY,13,4,200,0.696333036,0.183,0,0,0,1,51
95,3,13023,"MATHIS, Marvin Dawson",GA,44,2,100,1.437141124,-0.04,0,0,0,0,31
95,3,13024,"MAZZOLI, Romano Louis",KY,51,3,100,-0.972138194,-0.186,0,0,0,1,45
95,3,13026,"McCORMACK, Mike",WA,73,4,100,-0.83712289,-0.348,0,0,0,1,NA
95,3,13027,"McKAY, Koln Gunn",UT,67,1,100,-0.319442867,-0.254,0,0,0,1,67
95,3,13029,"McKINNEY, Stewart Brett",CT,1,4,200,-1.391412184,-0.006,0,0,0,1,57
95,3,13030,"METCALFE, Ralph Harold",IL,21,1,100,-2.886962102,-0.564,0,0,0,1,10
95,3,13031,"MITCHELL, Parren James",MD,52,7,100,-3.154941304,-0.526,0,0,0,1,18
95,3,13032,"MURPHY, Morgan Francis",IL,21,2,100,-0.713374081,-0.399,0,0,0,1,17
95,3,13035,"RANGEL, Charles B.",NY,13,19,100,-3.502346519,-0.514,0,0,0,1,13
95,3,13036,"ROBINSON, James Kenneth",VA,40,7,200,2.807735346,0.333,0,0,0,1,55
95,3,13038,"RUNNELS, Harold Lowell",NM,66,2,100,1.98071248,0.091,1,0,0,1,52
95,3,13040,"SEIBERLING, John Frederick",OH,24,14,100,-2.794215012,-0.496,0,0,0,1,37
95,3,13042,"SPENCE, Floyd Davidson",SC,48,2,200,2.228633832,0.32,1,0,0,1,48
95,3,13045,"THONE, Charles",NE,35,1,200,1.022931308,0.192,0,0,0,1,59
95,3,13047,"YOUNG, Charles William (Bill)",FL,43,6,200,2.148929174,0.325,0,0,0,1,51
95,3,13048,"DAVIS, Mendel Jackson",SC,48,1,100,1.043547191,-0.245,1,0,0,0,46
95,3,13055,"BUTLER, Manley Caldwell",VA,40,6,200,1.711107281,0.332,0,0,0,0,51
95,3,13056,"BREAUX, John Berlinger",LA,45,7,100,1.124443317,-0.123,0,0,0,0,39
95,3,14000,"ABDNOR, James",SD,37,2,200,1.864454613,0.241,0,0,0,0,52
95,3,14001,"ANDREWS, Ike Franklin",NC,47,4,100,0.030340639,-0.178,0,0,0,1,49
95,3,14002,"ARMSTRONG, William Lester",CO,62,5,200,1.483473945,0.508,0,0,0,0,60
95,3,14003,"BAFALIS, Louis Arthur (Skip)",FL,43,10,200,2.360651191,0.303,0,0,0,1,54
95,3,14004,"BEARD, Robin Leo, Jr.",TN,54,6,200,2.115669467,0.297,1,0,0,0,47
95,3,14005,"BOWEN, David Reece",MS,46,2,100,0.807764968,-0.134,0,0,0,0,47
95,3,14006,"BRECKINRIDGE, John Bayne",KY,51,6,100,-0.433148556,-0.223,1,0,0,1,47
95,3,14007,"BURGENER, Clair Walter",CA,71,43,200,1.740861917,0.281,0,0,0,1,60
95,3,14008,"BURKE, Yvonne Brathwaite",CA,71,28,100,-2.286042569,-0.576,0,0,1,0,29
95,3,14009,"COCHRAN, William Thad",MS,46,4,200,1.933282634,0.286,0,0,0,1,55
95,3,14010,"COHEN, William Sebastian",ME,2,2,200,-0.02122737,0.1,0,0,0,0,50
95,3,14013,"DANIEL, Robert Williams, Jr.",VA,40,4,200,2.857391182,0.318,1,0,0,1,41
95,3,14015,"GILMAN, Benjamin Arthur",NY,13,26,200,0.227225342,0.043,0,1,0,1,54
95,3,14016,"GINN, Ronald Bryan (Bo)",GA,44,1,100,0.835355041,-0.217,0,0,0,0,69
95,3,14018,"GUYER, Tennyson",OH,24,4,200,1.059161442,0.217,0,1,0,0,60
95,3,14021,"HOLT, Marjorie Sewell",MD,52,4,200,2.669824546,0.368,1,0,1,0,50
95,3,14022,"HOLTZMAN, Elizabeth",NY,13,16,100,-3.408591817,-0.493,0,0,1,0,29
95,3,14025,"JOHNSON, James Paul (Jim)",CO,62,4,200,-0.198038095,0.162,0,0,0,1,58
95,3,14026,"JONES, James Robert",OK,53,1,100,0.774153399,-0.095,0,0,0,1,62
95,3,14027,"JORDAN, Barbara Charline",TX,49,18,100,-1.662162574,-0.522,0,0,1,0,24
95,3,14028,"KETCHUM, William Matthew",CA,71,18,200,2.321953942,0.348,0,0,0,1,56
95,3,14029,"LEHMAN, William",FL,43,13,100,-2.013009854,-0.483,0,0,0,0,33
95,3,14031,"LOTT, Chester Trent",MS,46,5,200,2.556307737,0.39,0,0,0,0,53
95,3,14033,"MADIGAN, Edward Rell",IL,21,21,200,0.343753639,0.247,0,0,0,0,55
95,3,14035,"MARTIN, James Grubbs",NC,47,9,200,1.296852369,0.347,0,0,0,0,48
95,3,14037,"MILFORD, Dale",TX,49,24,100,0.564051878,0.012,0,0,0,1,NA
95,3,14038,"MITCHELL, Donald Jerome",NY,13,31,200,0.610036897,0.097,1,0,0,1,56
95,3,14039,"MOAKLEY, John Joseph",MA,3,9,100,-1.797407572,-0.418,0,0,0,1,44
95,3,14040,"MOORHEAD, Carlos John",CA,71,22,200,2.323702547,0.465,0,0,0,1,62
95,3,14041,"O'BRIEN, George Miller",IL,21,17,200,0.50137608,0.169,0,0,0,1,NA
95,3,14044,"PRITCHARD, Joel McFee",WA,73,1,200,-0.885515983,0.109,0,1,0,1,NA
95,3,14045,"REGULA, Ralph Straus",OH,24,16,200,0.72919682,0.221,0,0,0,1,52
95,3,14046,"RINALDO, Matthew John",NJ,12,12,200,-0.205988292,0.023,0,0,0,0,54
95,3,14048,"ROSE, Charles Grandison, III",NC,47,7,100,-0.322257695,-0.319,0,0,0,0,33
95,3,14049,"RYAN, Leo Joseph",CA,71,11,100,-1.384826708,-0.364,0,1,0,1,53
95,3,14050,"SARASIN, Ronald Arthur",CT,1,5,200,-0.399166637,0.133,0,0,0,0,56
95,3,14051,"SCHROEDER, Patricia Scott",CO,62,1,100,-1.880037,-0.225,1,0,1,0,50
95,3,14052,"SHUSTER, E. G. (Bud)",PA,14,9,200,2.410604919,0.416,0,0,0,1,59
95,3,14053,"STARK, Fortney Hillman (Pete), Jr.",CA,71,9,100,-3.313745953,-0.631,0,0,0,1,44
95,3,14055,"STUDDS, Gerry Eastman",MA,3,12,100,-2.948182971,-0.444,0,1,0,0,47
95,3,14056,"SYMMS, Steven Douglas",ID,63,1,200,4.892132835,0.687,0,0,0,1,60
95,3,14057,"TAYLOR, Gene",MO,34,7,200,3.678921792,0.328,0,0,0,0,53
95,3,14058,"THORNTON, Raymond Hoyt (Ray), Jr.",AR,42,4,100,-0.521291352,-0.306,0,0,0,1,31
95,3,14060,"TREEN, David Conner",LA,45,3,200,1.332582076,0.34,1,0,0,1,55
95,3,14061,"WALSH, William Francis",NY,13,33,200,0.797633301,0.068,0,0,0,0,60
95,3,14062,"WILSON, Charles",TX,49,2,100,-0.484995698,-0.196,0,0,0,1,42
95,3,14066,"YOUNG, Donald Edwin",AK,81,1,200,2.688004027,0.278,0,0,0,1,62
95,3,14067,"BOGGS, Corinne Claiborne (Lindy)",LA,45,2,100,-0.74006886,-0.359,0,0,1,0,44
95,3,14068,"COLLINS, Cardiss",IL,21,7,100,-2.415395801,-0.552,0,1,1,0,19
95,3,14069,"BAUMAN, Robert Edmund",MD,52,1,200,3.735688483,0.533,0,0,0,0,51
95,3,14070,"LUKEN, Thomas Andrew",OH,24,2,100,-0.348513341,-0.163,0,0,0,1,62
95,3,14071,"LAGOMARSINO, Robert John",CA,71,19,200,1.629103806,0.378,0,1,0,1,51
95,3,14072,"MURTHA, John Patrick, Jr.",PA,14,12,100,0.175539111,-0.265,0,0,0,1,49
95,3,14075,"TRAXLER, Jerome Bob",MI,23,8,100,-0.751428895,-0.33,0,0,0,1,56
95,3,14076,"BURTON, John Lowell",CA,71,5,100,-2.596293876,-0.413,0,0,0,0,50
95,3,14200,"AMBRO, Jerome Anthony, Jr.",NY,13,3,100,-0.479848659,-0.19,0,0,0,1,54
95,3,14201,"AuCOIN, Les",OR,72,1,100,-1.227916992,-0.231,0,0,0,1,55
95,3,14202,"BALDUS, Alvin James",WI,25,3,100,-2.520056896,-0.383,0,0,0,1,50
95,3,14203,"BAUCUS, Max Sieben",MT,64,1,100,-1.014512229,-0.212,0,0,0,0,54
95,3,14204,"BEARD, Edward Peter",RI,5,2,100,-0.818758313,-0.286,0,0,0,0,46
95,3,14205,"BEDELL, Berkley Warren",IA,31,6,100,-2.523259234,-0.24,0,1,0,1,54
95,3,14206,"BLANCHARD, James Johnston",MI,23,18,100,-1.40064311,-0.352,0,0,0,0,54
95,3,14207,"BLOUIN, Michael Thomas",IA,31,2,100,-2.06198392,-0.288,0,0,0,0,50
95,3,14208,"BONKER, Don Leroy",WA,73,3,100,-1.635071686,-0.336,0,1,0,1,NA
95,3,14209,"BRODHEAD, William McNulty",MI,23,17,100,-2.771999699,-0.463,0,0,0,0,50
95,3,14210,"CARR, Milton Robert (Bob)",MI,23,6,100,-2.231664446,-0.254,1,0,0,0,59
95,3,14211,"CORNELL, Robert John",WI,25,8,100,-2.074899145,-0.324,0,0,0,0,54
95,3,14212,"DERRICK, Butler Carson, Jr.",SC,48,3,100,0.287857918,-0.215,0,0,0,0,41
95,3,14213,"DODD, Christopher John",CT,1,2,100,-1.641500421,-0.328,0,0,0,1,50
95,3,14214,"DOWNEY, Thomas Joseph",NY,13,2,100,-1.99639503,-0.384,1,0,0,0,55
95,3,14215,"FISHER, Joseph Lyman",VA,40,10,100,-1.555213344,-0.298,0,0,0,1,52
95,3,14216,"EARLY, Joseph Daniel",MA,3,3,100,-1.459516161,-0.254,0,0,0,1,39
95,3,14217,"EDGAR, Robert William",PA,14,7,100,-2.211405942,-0.334,0,0,0,0,54
95,3,14218,"EMERY, David Farnham",ME,2,1,200,0.623946486,0.155,1,0,0,0,51
95,3,14219,"ENGLISH, Glenn Lee, Jr.",OK,53,6,100,1.330530435,-0.027,0,0,0,0,NA
95,3,14220,"EVANS, David Walter",IN,22,6,100,0.388181469,-0.054,0,0,0,0,59
95,3,14221,"FENWICK, Millicent Hammond",NJ,12,5,200,-1.667228486,0.134,0,0,1,0,59
95,3,14222,"FITHIAN, Floyd James",IN,22,2,100,-0.15511943,-0.165,0,0,0,1,61
95,3,14223,"FLORIO, James Joseph",NJ,12,1,100,-0.91054781,-0.318,0,0,0,1,42
95,3,14224,"FORD, Harold Eugene",TN,54,8,100,-1.539919614,-0.438,0,0,0,0,35
95,3,14225,"GRADISON, Willis David, Jr.",OH,24,1,200,0.219855319,0.233,0,0,0,0,59
95,3,14226,"GRASSLEY, Charles Ernest",IA,31,3,200,1.249568432,0.341,0,0,0,0,52
95,3,14227,"HAGEDORN, Thomas Michael",MN,33,2,200,1.263437229,0.308,0,0,0,1,50
95,3,14229,"HANNAFORD, Mark Warren",CA,71,34,100,-1.053754252,-0.295,0,0,0,1,57
95,3,14230,"HARKIN, Thomas Richard (Tom)",IA,31,5,100,-1.496078324,-0.351,0,0,0,1,51
95,3,14231,"HARRIS, Herbert Eugene, II",VA,40,8,100,-1.219756532,-0.324,0,0,0,0,52
95,3,14233,"HEFNER, Willie Gathrel (Bill)",NC,47,8,100,0.139713691,-0.264,0,0,0,0,45
95,3,14234,"HIGHTOWER, Jack English",TX,49,13,100,0.354936903,-0.115,0,0,0,1,51
95,3,14235,"HOLLAND, Kenneth Lamar",SC,48,5,100,0.403327426,-0.246,0,0,0,0,39
95,3,14237,"HUBBARD, Carroll, Jr.",KY,51,1,100,1.0622434,-0.038,0,0,0,0,33
95,3,14238,"HUGHES, William John",NJ,12,2,100,-0.506394982,-0.153,0,0,0,0,49
95,3,14239,"HYDE, Henry John",IL,21,6,200,0.356803497,0.312,0,0,0,1,60
95,3,14240,"JEFFORDS, James Merrill",VT,6,1,200,-0.424265298,0.014,0,0,0,1,56
95,3,14241,"JENRETTE, John Wilson, Jr.",SC,48,6,100,0.351504002,-0.316,0,0,0,0,38
95,3,14242,"KASTEN, Robert Walter, Jr.",WI,25,9,200,1.055238984,0.261,0,0,0,1,60
95,3,14243,"KELLY, Richard",FL,43,5,200,2.918199967,0.504,0,0,0,1,50
95,3,14244,"KEYS, Martha Elizabeth",KS,32,2,100,-1.651386289,-0.231,0,0,1,0,55
95,3,14245,"KINDNESS, Thomas Norman",OH,24,8,200,2.130858559,0.419,0,0,0,0,54
95,3,14246,"KREBS, John Hans",CA,71,17,100,-1.120521187,-0.279,0,0,0,1,54
95,3,14247,"KRUEGER, Robert Charles",TX,49,21,100,-0.282708233,-0.117,0,0,0,0,NA
95,3,14248,"LaFALCE, John Joseph",NY,13,36,100,-1.353449161,-0.357,0,0,0,1,54
95,3,14249,"LEVITAS, Elliott Harris",GA,44,4,100,0.333655095,-0.056,0,0,0,1,43
95,3,14250,"LLOYD, James Fredrick",CA,71,35,100,-0.41306067,-0.218,1,0,0,1,56
95,3,14251,"LLOYD, Marilyn Laird",TN,54,3,100,2.028331175,-0.058,0,0,1,0,48
95,3,14252,"McDONALD, Lawrence Patton",GA,44,7,100,4.869798733,0.884,1,0,0,1,36
95,3,14253,"McHUGH, Matthew Francis",NY,13,27,100,-1.947424459,-0.353,0,0,0,0,55
95,3,14254,"MAGUIRE, Gene Andrew",NJ,12,7,100,-3.5014341,-0.338,0,0,0,0,58
95,3,14255,"MEYNER, Helen Stevenson",NJ,12,13,100,-1.964104435,-0.411,0,1,1,0,59
95,3,14256,"MILLER, George",CA,71,7,100,-2.999081416,-0.552,0,0,0,0,48
95,3,14257,"MINETA, Norman Y.",CA,71,13,100,-2.028599042,-0.479,0,0,0,1,54
95,3,14258,"MOFFETT, Anthony John, Jr. (Toby)",CT,1,6,100,-2.781212512,-0.377,0,0,0,0,52
95,3,14259,"MOORE, William Henson, III",LA,45,6,200,1.875366266,0.24,0,0,0,1,45
95,3,14260,"MOTTL, Ronald Milton",OH,24,23,100,0.500600102,0.021,0,0,0,0,57
95,3,14261,"MYERS, Gary Arthur",PA,14,25,200,-0.362240913,0.291,0,0,0,1,46
95,3,14262,"NEAL, Stephen Lybrook",NC,47,5,100,-0.120368904,-0.145,0,0,0,0,49
95,3,14263,"NOLAN, Richard Michael",MN,33,6,100,-2.83994303,-0.371,0,0,0,0,43
95,3,14264,"NOWAK, Henry James",NY,13,37,100,-1.773454295,-0.332,0,0,0,1,37
95,3,14265,"OBERSTAR, James Louis",MN,33,8,100,-2.351963059,-0.553,0,0,0,0,34
95,3,14266,"PATTERSON, Jerry Mumford",CA,71,38,100,-1.199154662,-0.367,0,0,0,1,56
95,3,14267,"PATTISON, Edward Worthington",NY,13,29,100,-2.16916997,-0.323,0,0,0,1,61
95,3,14268,"PRESSLER, Larry Lee",SD,37,1,200,0.422209248,0.213,0,0,0,1,49
95,3,14269,"RICHMOND, Frederick William",NY,13,14,100,-4.142664036,-0.564,0,0,0,1,22
95,3,14270,"RISENHOOVER, Theodore Marshall",OK,53,2,100,0.917952963,-0.214,0,0,0,1,46
95,3,14271,"RUSSO, Martin Anthony",IL,21,3,100,-0.128602568,-0.192,0,0,0,0,58
95,3,14272,"SANTINI, James David",NV,65,1,100,0.036077182,-0.074,0,0,0,1,52
95,3,14273,"SCHULZE, Richard Taylor",PA,14,5,200,1.591823526,0.271,0,0,0,1,61
95,3,14274,"SHARP, Philip Riley",IN,22,10,100,-1.355656719,-0.166,0,0,0,0,55
95,3,14275,"SIMON, Paul Martin",IL,21,24,100,-2.060847321,-0.397,0,0,0,0,46
95,3,14276,"SMITH, Virginia Dodd",NE,35,3,200,1.332075799,0.238,0,0,1,0,63
95,3,14277,"SOLARZ, Stephen Joshua",NY,13,13,100,-2.188188534,-0.429,0,1,0,0,28
95,3,14278,"SPELLMAN, Gladys Noon",MD,52,5,100,-1.20469781,-0.308,0,0,1,0,41
95,3,14279,"TSONGAS, Paul Efthemios",MA,3,5,100,-2.266828048,-0.383,0,0,0,0,41
95,3,14280,"WAXMAN, Henry Arnold",CA,71,24,100,-2.178766106,-0.473,0,0,0,0,44
95,3,14281,"WEAVER, James Howard",OR,72,4,100,-1.693688497,-0.311,0,0,0,1,42
95,3,14282,"WIRTH, Timothy E.",CO,62,2,100,-2.232145175,-0.293,0,0,0,0,58
95,3,14283,"ZEFERETTI, Leo C.",NY,13,15,100,0.075166566,-0.305,0,0,0,1,50
95,3,14284,"D'AMOURS, Norman Edward",NH,4,1,100,-0.653299928,-0.17,0,0,0,0,NA
95,3,14285,"FARY, John G.",IL,21,5,100,-1.087308081,-0.451,0,0,0,0,33
95,3,14286,"ALLEN, Clifford Robertson",TN,54,5,100,-0.218348584,-0.257,0,0,0,0,37
95,3,14287,"PETTIS, Shirley Neil",CA,71,37,200,0.304314908,0.209,0,1,1,0,55
95,3,14288,"GOODLING, William Franklin",PA,14,19,200,0.526586267,0.336,0,1,0,1,60
95,3,14289,"LUNDINE, Stanley Nelson",NY,13,39,100,-2.013929323,-0.31,0,0,0,0,58
95,3,14291,"HALL, Sam Blakeley, Jr.",TX,49,1,100,1.393796873,0.054,0,0,0,1,40
95,3,14400,"AKAKA, Daniel Kahikina",HI,82,2,100,-1.208655673,-0.419,0,0,0,1,47
95,3,14401,"AMMERMAN, Joseph Scofield",PA,14,23,100,-1.066723034,-0.303,0,0,0,1,54
95,3,14402,"APPLEGATE, Douglas Earl",OH,24,18,100,0.198343419,-0.106,0,0,0,0,45
95,3,14403,"BADHAM, Robert Edward",CA,71,40,200,2.832070345,0.541,1,0,0,1,68
95,3,14404,"BARNARD, Druie Douglas, Jr.",GA,44,10,100,0.756445492,-0.028,0,0,0,1,34
95,3,14405,"BEILENSON, Anthony Charles",CA,71,23,100,-3.5642627,-0.44,0,1,0,0,47
95,3,14406,"BENJAMIN, Adam, Jr.",IN,22,1,100,-0.714511839,-0.267,0,0,0,1,39
95,3,14407,"BONIOR, David Edward",MI,23,12,100,-3.058550306,-0.547,0,0,0,1,54
95,3,14408,"CAPUTO, Bruce Faulkner",NY,13,23,200,-0.311614334,0.152,0,0,0,0,48
95,3,14409,"CAVANAUGH, John Joseph",NE,35,2,100,-1.699233416,-0.232,0,1,0,0,60
95,3,14410,"COLEMAN, Earl Thomas",MO,34,6,200,1.261056305,0.262,0,0,0,0,48
95,3,14411,"CORCORAN, Thomas Joseph",IL,21,15,200,0.945799551,0.319,0,0,0,1,40
95,3,14412,"CORNWELL, David Lance",IN,22,8,100,-0.70045092,-0.257,0,0,0,1,50
95,3,14413,"DICKS, Norman DeValois",WA,73,6,100,-0.965795163,-0.312,0,0,0,0,NA
95,3,14414,"DORNAN, Robert Kenneth",CA,71,27,200,1.517106552,0.49,0,0,0,1,60
95,3,14415,"EDWARDS, Marvin Henry (Mickey)",OK,53,5,200,2.059882202,0.394,0,0,0,0,NA
95,3,14416,"ERTEL, Allen Edward",PA,14,17,100,-0.217678966,-0.171,0,0,0,1,58
95,3,14417,"EVANS, Thomas Beverley, Jr.",DE,11,1,200,0.36175434,0.178,0,0,0,1,47
95,3,14418,"EVANS, Billy Lee",GA,44,8,100,0.806484846,-0.091,0,0,0,0,25
95,3,14419,"FLIPPO, Ronnie Gene",AL,41,5,100,0.729012669,-0.175,0,0,0,0,32
95,3,14420,"GAMMAGE, Robert Alton",TX,49,22,100,1.016975326,0.006,0,0,0,1,50
95,3,14421,"GEPHARDT, Richard Andrew",MO,34,3,100,-0.768509551,-0.416,0,0,0,1,51
95,3,14422,"GLICKMAN, Daniel Robert",KS,32,4,100,-0.656830483,-0.133,0,0,0,0,51
95,3,14423,"GORE, Albert Arnold, Jr.",TN,54,4,100,-0.991096717,-0.316,0,0,0,1,32
95,3,14424,"GUDGER, Vonno Lamar, Jr.",NC,47,11,100,0.564011827,-0.154,0,0,0,1,46
95,3,14425,"HEFTEL, Cecil Landau",HI,82,1,100,-0.817719531,-0.269,0,0,0,1,51
95,3,14426,"HOLLENBECK, Harold Capistran",NJ,12,9,200,-0.612658292,-0.042,0,0,0,0,54
95,3,14427,"HUCKABY, Thomas Jerald",LA,45,5,100,1.680553931,-0.009,0,0,0,0,51
95,3,14429,"JENKINS, Edgar Lanier (Ed)",GA,44,9,100,0.982773151,-0.116,0,0,0,1,29
95,3,14430,"KILDEE, Dale Edward",MI,23,7,100,-2.447287271,-0.385,0,0,0,0,48
95,3,14431,"KOSTMAYER, Peter Houston",PA,14,8,100,-2.281346946,-0.298,0,0,0,0,53
95,3,14432,"LEACH, James Albert Smith",IA,31,1,200,-0.406246957,0.141,0,0,0,0,50
95,3,14433,"LeFANTE, Joseph Anthony",NJ,12,14,100,-0.855609751,-0.407,0,0,0,0,43
95,3,14434,"LEDERER, Raymond Francis",PA,14,3,100,-0.858631048,-0.391,0,0,0,0,32
95,3,14435,"MARKEY, Edward John",MA,3,7,100,-2.811648738,-0.5,0,0,0,1,41
95,3,14436,"MARKS, Marc Lincoln",PA,14,24,200,-0.654181775,-0.011,0,0,0,1,48
95,3,14437,"MARLENEE, Ronald Charles",MT,64,2,200,0.803261081,0.393,0,0,0,0,54
95,3,14438,"MARRIOTT, David Daniel",UT,67,2,200,2.066034201,0.264,0,0,0,0,63
95,3,14439,"MATTOX, James Albon",TX,49,5,100,-0.629536927,-0.19,0,0,0,0,NA
95,3,14440,"MIKULSKI, Barbara Ann",MD,52,3,100,-1.832683048,-0.37,0,0,1,0,48
95,3,14441,"MURPHY, Austin John",PA,14,22,100,0.124940877,-0.081,0,0,0,1,41
95,3,14442,"MYERS, Michael Joseph (Ozzie)",PA,14,1,100,-0.795965204,-0.418,0,0,0,0,29
95,3,14443,"OAKAR, Mary Rose",OH,24,20,100,-0.961930886,-0.4,0,0,1,0,38
95,3,14444,"PANETTA, Leon Edward",CA,71,16,100,-1.083650783,-0.258,0,0,0,1,50
95,3,14445,"PEASE, Donald James",OH,24,13,100,-2.181631012,-0.308,0,1,0,1,46
95,3,14446,"PURSELL, Carl Duane",MI,23,2,200,-0.749772197,0.12,0,0,0,1,55
95,3,14447,"QUAYLE, James Danforth (Dan)",IN,22,4,200,0.732738636,0.498,0,0,0,1,60
95,3,14448,"RAHALL, Nick Joe, II",WV,56,4,100,-0.639855767,-0.306,0,0,0,0,37
95,3,14449,"RUDD, Eldon Dean",AZ,61,4,200,3.59941778,0.422,0,0,0,1,62
95,3,14450,"SAWYER, Harold Samuel",MI,23,5,200,0.208085605,0.167,0,0,0,1,68
95,3,14451,"SKELTON, Isaac Newton, IV (Ike)",MO,34,4,100,0.296070891,-0.172,0,0,0,0,48
95,3,14452,"STEERS, Newton Ivan, Jr.",MD,52,8,200,-1.65896249,-0.1,0,0,0,1,48
95,3,14453,"STOCKMAN, David Alan",MI,23,4,200,0.605869994,0.401,0,0,0,1,59
95,3,14455,"TONRY, Richard Alvin",LA,45,1,100,0.995064329,-0.307,1,0,0,0,49
95,3,14455,"TONRY, Richard Alvin",LA,45,1,100,0.995064329,-0.307,1,0,0,0,49
95,3,14456,"TRIBLE, Paul Seward, Jr.",VA,40,1,200,1.478434412,0.263,1,0,0,0,48
95,3,14457,"TUCKER, James (Jim) Guy, Jr.",AR,42,2,100,-1.045240563,-0.33,0,0,0,1,32
95,3,14458,"VENTO, Bruce Frank",MN,33,4,100,-2.36094026,-0.472,0,0,0,0,39
95,3,14459,"VOLKMER, Harold Lee",MO,34,9,100,-0.42406514,-0.196,0,0,0,1,50
95,3,14459,"VOLKMER, Harold Lee",MO,34,9,100,-0.42406514,-0.196,0,0,0,0,50
95,3,14460,"WALGREN, Douglas",PA,14,18,100,-1.553502404,-0.247,0,0,0,0,55
95,3,14461,"WALKER, Robert Smith",PA,14,16,200,1.217119343,0.581,0,0,0,1,64
95,3,14462,"WATKINS, Wesley Wade",OK,53,3,100,1.55589684,-0.126,0,0,0,1,36
95,3,14463,"WEISS, Theodore S.",NY,13,20,100,-3.796032961,-0.564,0,0,0,1,23
95,3,14464,"WHITLEY, Charles Orville",NC,47,3,100,0.605601804,-0.175,1,0,0,1,41
95,3,14465,"YOUNG, Robert Anton, III",MO,34,2,100,-0.19607397,-0.3,0,0,0,1,57
95,3,14469,"LIVINGSTON, Robert Linlithgow, Jr.",LA,45,1,200,1.817102004,0.326,0,0,0,1,49
95,3,14469,"LIVINGSTON, Robert Linlithgow, Jr.",LA,45,1,200,1.817102004,0.326,0,0,0,1,49
95,3,14470,"GARCIA, Robert",NY,13,21,100,-3.489591404,-0.559,0,0,0,1,9
95,3,14470,"GARCIA, Robert",NY,13,21,100,-3.489591404,-0.559,0,0,0,1,9
95,3,14471,"GREEN, Sedgwick William (Bill)",NY,13,18,200,-1.643237732,-0.044,0,0,0,1,37
95,3,14471,"GREEN, Sedgwick William (Bill)",NY,13,18,200,-1.643237732,-0.044,0,0,0,1,37
95,3,94428,"IRELAND, Andrew Poysell (Andy)",FL,43,8,100,0.713764031,0.015,0,0,0,0,52
95,3,94454,"STUMP, Robert Lee",AZ,61,3,100,2.820271518,0.329,1,0,0,1,60
96,4,267,"ASHLEY, Thomas William Ludlow",OH,24,9,100,-1.558869448,-0.35,0,0,0,1,41
96,4,633,"BENNETT, Charles Edward",FL,43,3,100,0.235020143,-0.088,1,0,0,1,36
96,4,830,"BOLAND, Edward Patrick",MA,3,2,100,-1.252960154,-0.306,0,0,0,1,39
96,4,835,"BOLLING, Richard Walker",MO,34,5,100,-1.774327918,-0.504,0,0,0,1,41
96,4,948,"BRADEMAS, John",IN,22,3,100,-1.848483175,-0.462,0,0,0,1,54
96,4,1077,"BROOKS, Jack Bascom",TX,49,9,100,-0.671768595,-0.407,0,0,0,1,41
96,4,1087,"BROOMFIELD, William S.",MI,23,19,200,0.434802143,0.227,0,1,0,0,63
96,4,2009,"CONTE, Silvio Ottavio",MA,3,1,200,-0.820417607,-0.023,0,0,0,1,42
96,4,2525,"DERWINSKI, Edward Joseph",IL,21,4,200,0.132471861,0.342,0,1,0,1,62
96,4,2533,"DEVINE, Samuel Leeper",OH,24,12,200,2.919709665,0.502,0,0,0,0,56
96,4,2594,"DIGGS, Charles Coles, Jr.",MI,23,13,100,-1.975633899,-0.539,0,1,0,1,11
96,4,2594,"DIGGS, Charles Coles, Jr.",MI,23,13,100,-1.975633899,-0.539,0,1,0,1,11
96,4,2605,"DINGELL, John David, Jr.",MI,23,16,100,-1.15971034,-0.448,0,0,0,1,45
96,4,3078,"FASCELL, Dante Bruno",FL,43,15,100,-1.846486389,-0.4,0,1,0,1,46
96,4,3224,"FLOOD, Daniel John",PA,14,11,100,-1.086177203,-0.377,0,0,0,0,46
96,4,3224,"FLOOD, Daniel John",PA,14,11,100,-1.086177203,-0.377,0,0,0,0,46
96,4,3321,"FOUNTAIN, Lawrence H.",NC,47,2,100,0.860418318,-0.041,0,1,0,1,39
96,4,3553,"GIAIMO, Robert Nicholas",CT,1,3,100,-1.396296234,-0.318,0,0,0,1,54
96,4,4957,"JOHNSON, Harold Terry",CA,71,1,100,-0.806255089,-0.439,0,0,0,0,49
96,4,5101,"KASTENMEIER, Robert William",WI,25,2,100,-3.341617273,-0.514,0,0,0,1,47
96,4,5495,"LATTA, Delbert Leroy",OH,24,5,200,2.151075851,0.391,0,0,0,0,55
96,4,6455,"MICHEL, Robert Henry",IL,21,18,200,1.090924761,0.372,0,0,0,1,56
96,4,6584,"MOLLOHAN, Robert Homer",WV,56,1,100,-0.795659124,-0.349,1,0,0,0,44
96,4,6661,"MOORHEAD, William Singer",PA,14,14,100,-1.866840956,-0.416,0,0,0,1,41
96,4,6845,"NATCHER, William Huston",KY,51,2,100,0.05270965,-0.288,0,0,0,1,45
96,4,7081,"O'NEILL, Thomas Philip, Jr. (Tip)",MA,3,8,100,-2.010458366,-0.402,0,0,0,0,35
96,4,7333,"PEPPER, Claude Denson",FL,43,14,100,-1.197040129,-0.422,0,0,0,0,44
96,4,7343,"PERKINS, Carl Dewey",KY,51,7,100,0.002722243,-0.343,0,0,0,1,39
96,4,7610,"PRICE, Charles Melvin",IL,21,23,100,-1.354634118,-0.429,1,0,0,1,41
96,4,7824,"REUSS, Henry Schoellkopf",WI,25,5,100,-2.586424586,-0.481,0,0,0,1,37
96,4,7845,"RHODES, John Jacob",AZ,61,1,200,0.429587935,0.225,0,0,0,1,61
96,4,8010,"RODINO, Peter Wallace, Jr.",NJ,12,10,100,-3.10284346,-0.435,0,0,0,1,27
96,4,8080,"ROSTENKOWSKI, Daniel David",IL,21,8,100,-1.450304044,-0.39,0,0,0,1,30
96,4,8564,"SLACK, John Mark, Jr.",WV,56,3,100,-0.009496,-0.281,0,0,0,0,42
96,4,8564,"SLACK, John Mark, Jr.",WV,56,3,100,-0.009496,-0.281,0,0,0,0,42
96,4,8672,"SMITH, Neal Edward",IA,31,4,100,-1.123213885,-0.313,0,0,0,1,46
96,4,8824,"STAGGERS, Harley Orrin",WV,56,2,100,-0.626579914,-0.345,0,0,0,1,44
96,4,8866,"STEED, Thomas Jefferson",OK,53,4,100,-0.634832762,-0.279,0,0,0,1,NA
96,4,9017,"STRATTON, Samuel Studdiford",NY,13,28,100,0.588417729,-0.139,1,0,0,1,51
96,4,9322,"THOMPSON, Frank, Jr.",NJ,12,4,100,-3.077785782,-0.511,0,0,0,1,46
96,4,9551,"ULLMAN, Albert Conrad",OR,72,2,100,-1.659519688,-0.367,0,0,0,1,51
96,4,9623,"VANIK, Charles Albert",OH,24,22,100,-2.114814921,-0.366,0,0,0,1,50
96,4,9802,"WAMPLER, William Creed",VA,40,9,200,1.098276935,0.146,0,0,0,1,47
96,4,10075,"WHITTEN, Jamie Lloyd",MS,46,1,100,0.478319351,-0.161,0,0,0,0,38
96,4,10249,"WILSON, Robert Carlton (Bob)",CA,71,41,200,0.537673364,0.264,1,0,0,1,57
96,4,10391,"WRIGHT, James Claude, Jr.",TX,49,12,100,-1.365018545,-0.383,0,0,0,1,44
96,4,10421,"YATES, Sidney Richard",IL,21,9,100,-2.664845468,-0.494,0,0,0,1,42
96,4,10463,"ZABLOCKI, Clement John",WI,25,4,100,-1.4964377,-0.355,0,1,0,0,45
96,4,10500,"ADDABBO, Joseph Patrick",NY,13,7,100,-1.389251428,-0.402,0,0,0,0,27
96,4,10501,"ANDERSON, John Bayard",IL,21,16,200,-1.085107342,0.183,0,0,0,1,59
96,4,10502,"ASHBROOK, John Milan",OH,24,17,200,3.552958392,0.612,0,0,0,1,54
96,4,10511,"CORMAN, James Charles",CA,71,21,100,-2.041119578,-0.53,0,0,0,1,48
96,4,10517,"FINDLEY, Paul",IL,21,20,200,-0.405043411,0.246,0,1,0,1,53
96,4,10520,"GONŹLEZ, Henry B.",TX,49,20,100,-1.244923902,-0.538,0,0,0,0,26
96,4,10525,"HARSHA, William Howard",OH,24,6,200,1.815555471,0.188,0,0,0,1,51
96,4,10528,"ICHORD, Richard Howard, II",MO,34,8,100,1.869994663,0.001,1,0,0,0,53
96,4,10540,"NEDZI, Lucien Norbert",MI,23,14,100,-1.978485609,-0.427,1,0,0,1,51
96,4,10550,"ROBERTS, Herbert Ray",TX,49,4,100,0.667525968,-0.131,0,0,0,1,49
96,4,10551,"ROSENTHAL, Benjamin Stanley",NY,13,8,100,-3.087493755,-0.562,0,1,0,1,33
96,4,10553,"ROUSSELOT, John Harbin",CA,71,26,200,3.135596402,0.601,0,0,0,0,62
96,4,10561,"ST. GERMAIN, Fernand Joseph",RI,5,1,100,-1.414019006,-0.355,0,0,0,1,43
96,4,10566,"UDALL, Morris King",AZ,61,2,100,-1.396296032,-0.387,0,0,0,1,52
96,4,10569,"ANDREWS, Mark",ND,36,1,200,1.236115884,0.087,0,0,0,1,53
96,4,10573,"BROWN, George Edward, Jr.",CA,71,36,100,-2.404183087,-0.506,0,0,0,1,44
96,4,10574,"BROYHILL, James Thomas",NC,47,10,200,1.092057835,0.269,0,0,0,0,46
96,4,10577,"BURTON, Phillip",CA,71,6,100,-4.024129149,-0.634,0,0,0,1,43
96,4,10579,"CLAUSEN, Donald Holst",CA,71,2,200,1.477257681,0.16,0,0,0,1,49
96,4,10581,"CLEVELAND, James Colgate",NH,4,2,200,0.993472506,0.218,0,0,0,1,NA
96,4,10582,"DUNCAN, Robert Blackford",OR,72,3,100,-1.302346332,-0.341,0,0,0,1,44
96,4,10583,"EDWARDS, William Donlon (Don)",CA,71,10,100,-3.762083847,-0.599,0,0,0,1,41
96,4,10587,"FUQUA, Don",FL,43,2,100,-0.025760408,-0.173,0,0,0,1,37
96,4,10588,"GIBBONS, Sam Melville",FL,43,7,100,-0.730791965,-0.233,0,0,0,1,46
96,4,10595,"HAWKINS, Augustus Freeman (Gus)",CA,71,29,100,-2.47921346,-0.517,0,0,0,0,19
96,4,10596,"HORTON, Frank Jefferson",NY,13,34,200,-0.141007615,-0.004,0,0,0,1,56
96,4,10601,"LONG, Clarence Dickinson",MD,52,2,100,-1.022143824,-0.274,0,0,0,1,52
96,4,10602,"LONG, Gillis William",LA,45,8,100,-0.748190477,-0.368,0,0,0,1,38
96,4,10606,"McCLORY, Robert",IL,21,13,200,0.619438253,0.256,0,0,0,1,63
96,4,10607,"McDADE, Joseph Michael",PA,14,10,200,0.182326589,0.093,0,0,0,0,51
96,4,10609,"MINISH, Joseph George",NJ,12,11,100,-0.827522006,-0.299,0,0,0,1,51
96,4,10611,"MURPHY, John Michael",NY,13,17,100,-0.454289612,-0.406,0,0,0,1,45
96,4,10613,"PATTEN, Edward James",NJ,12,15,100,-1.348056977,-0.424,0,0,0,0,46
96,4,10614,"PICKLE, James Jarrell (Jake)",TX,49,10,100,-0.120339517,-0.218,0,0,0,1,46
96,4,10616,"QUILLEN, James Henry",TN,54,1,200,1.995956876,0.246,0,0,0,1,54
96,4,10621,"ROYBAL, Edward R.",CA,71,25,100,-3.006144313,-0.61,0,0,0,1,37
96,4,10626,"SNYDER, Marion Gene",KY,51,4,200,2.39048548,0.26,0,0,0,0,57
96,4,10633,"VAN DEERLIN, Lionel",CA,71,42,100,-1.614354276,-0.401,0,0,0,1,47
96,4,10638,"WYDLER, John Waldemar",NY,13,5,200,0.687884377,0.277,0,0,0,1,52
96,4,10640,"WILSON, Charles Herbert",CA,71,31,100,0.231366844,-0.39,1,0,0,1,34
96,4,10703,"ANNUNZIO, Frank",IL,21,11,100,-1.338024294,-0.398,0,0,0,0,52
96,4,10705,"BINGHAM, Jonathan Brewster",NY,13,22,100,-3.326014858,-0.509,0,1,0,1,23
96,4,10706,"BUCHANAN, John Hall, Jr.",AL,41,6,200,-0.565211172,0.146,0,1,0,1,56
96,4,10710,"CARTER, Tim Lee",KY,51,5,200,1.043445707,0.08,0,0,0,1,57
96,4,10712,"CONABLE, Barber Benjamin, Jr.",NY,13,35,200,-0.018504226,0.371,0,0,0,1,57
96,4,10713,"CONYERS, John, Jr.",MI,23,1,100,-2.895513241,-0.658,0,0,0,1,9
96,4,10716,"de la GARZA, Eligio, II (Kika)",TX,49,15,100,0.500784584,-0.255,0,0,0,1,34
96,4,10717,"DICKINSON, William Louis",AL,41,2,200,1.934517043,0.398,1,0,0,1,46
96,4,10719,"DUNCAN, John James",TN,54,2,200,1.811777725,0.194,0,0,0,1,51
96,4,10721,"EDWARDS, William Jackson (Jack)",AL,41,1,200,0.637818121,0.177,0,0,0,1,51
96,4,10722,"ERLENBORN, John Neal",IL,21,14,200,-0.315175452,0.315,0,0,0,1,71
96,4,10726,"FOLEY, Thomas Stephen",WA,73,5,100,-1.403648404,-0.354,0,0,0,0,NA
96,4,10727,"FORD, William David",MI,23,15,100,-1.955107114,-0.516,0,0,0,1,47
96,4,10732,"HAMILTON, Lee Herbert",IN,22,9,100,-1.30606783,-0.171,0,1,0,0,49
96,4,10733,"HANLEY, James Michael",NY,13,32,100,-1.086883695,-0.306,0,0,0,1,61
96,4,10734,"HANSEN, George Vernon",ID,63,2,200,4.983947891,0.621,0,0,0,1,64
96,4,10739,"HOWARD, James John",NJ,12,3,100,-1.206142157,-0.431,0,0,0,1,56
96,4,10742,"JACOBS, Andrew, Jr.",IN,22,11,100,-0.12737144,-0.07,0,0,0,1,55
96,4,10749,"McEWEN, Robert Cameron",NY,13,30,200,0.801292615,0.234,0,0,0,1,58
96,4,10760,"OTTINGER, Richard Lawrence",NY,13,24,100,-2.825044023,-0.391,0,0,0,0,53
96,4,10767,"SATTERFIELD, David Edward, III",VA,40,3,100,2.107618212,0.265,0,0,0,1,57
96,4,10768,"SCHEUER, James Haas",NY,13,11,100,-1.993159478,-0.478,0,0,0,1,30
96,4,10773,"STANTON, John William",OH,24,11,200,-0.077047314,0.135,0,0,0,1,48
96,4,10783,"WHITE, Richard Crawford",TX,49,16,100,0.84723377,-0.137,1,0,0,1,NA
96,4,10784,"WOLFF, Lester Lionel",NY,13,6,100,-1.031374055,-0.264,0,1,0,1,50
96,4,10786,"BROWN, Clarence J., Jr.",OH,24,7,200,1.053749329,0.3,0,0,0,1,54
96,4,10788,"JONES, Walter Beaman, Sr.",NC,47,1,100,0.312941815,-0.259,0,0,0,0,40
96,4,10794,"VANDER JAGT, Guy Adrian",MI,23,9,200,1.015832532,0.247,0,0,0,0,64
96,4,11000,"BEVILL, Tom",AL,41,4,100,0.599670094,-0.213,0,0,0,1,35
96,4,11005,"BRINKLEY, Jack Thomas",GA,44,3,100,0.77555845,-0.073,1,0,0,1,31
96,4,11013,"ECKHARDT, Robert Christian",TX,49,8,100,-2.278375251,-0.547,0,0,0,1,37
96,4,11020,"HAMMERSCHMIDT, John Paul",AR,42,3,200,2.036853152,0.253,0,0,0,1,44
96,4,11021,"HECKLER, Margaret M.",MA,3,10,200,-0.130829806,-0.007,0,0,1,0,44
96,4,11023,"KAZEN, Abraham, Jr.",TX,49,23,100,0.338704203,-0.219,1,0,0,1,41
96,4,11034,"MILLER, Clarence E.",OH,24,10,200,1.790057268,0.416,0,0,0,0,51
96,4,11035,"MONTGOMERY, Gillespie V. (Sonny)",MS,46,3,100,1.713308145,0.017,1,0,0,1,51
96,4,11036,"MYERS, John Thomas",IN,22,7,200,2.119406044,0.236,0,0,0,1,63
96,4,11037,"NICHOLS, William Flynt",AL,41,3,100,1.195338694,-0.042,1,0,0,1,40
96,4,11041,"RAILSBACK, Thomas Fisher",IL,21,19,200,-0.358518425,0.103,0,0,0,1,54
96,4,11057,"WINN, Edward Lawrence, Jr. (Larry)",KS,32,3,200,0.590862347,0.247,0,1,0,0,58
96,4,11058,"WYLIE, Chalmers Pangburn",OH,24,15,200,0.621700426,0.23,0,0,0,1,59
96,4,11063,"McCLOSKEY, Paul Norton , Jr. (Pete)",CA,71,12,200,-0.898943977,0.028,0,0,0,1,53
96,4,11066,"COLLINS, James Mitchell",TX,49,3,200,4.443044721,0.679,0,0,0,1,NA
96,4,11067,"GAYDOS, Joseph Matthew",PA,14,20,100,0.418815841,-0.278,0,0,0,1,45
96,4,12000,"ALEXANDER, William Vollie (Bill), Jr.",AR,42,1,100,-1.10801275,-0.41,0,0,0,1,30
96,4,12001,"ANDERSON, Glenn Malcolm",CA,71,32,100,-0.366763074,-0.269,0,0,0,1,45
96,4,12003,"BIAGGI, Mario",NY,13,10,100,-0.753101778,-0.339,0,0,0,0,43
96,4,12004,"BURLISON, Bill D.",MO,34,10,100,-1.38376085,-0.475,0,0,0,1,43
96,4,12007,"CHAPPELL, William Venroe, Jr.",FL,43,4,100,0.908340379,-0.098,0,0,0,1,47
96,4,12008,"CHISHOLM, Shirley Anita",NY,13,12,100,-3.14790919,-0.605,0,0,1,0,18
96,4,12009,"CLAY, William Lacy, Sr.",MO,34,1,100,-3.416516064,-0.49,0,0,0,1,29
96,4,12010,"COUGHLIN, Robert Lawrence",PA,14,13,200,0.146741342,0.204,0,0,0,1,57
96,4,12011,"DANIEL, Wilbur Clarence (Dan)",VA,40,5,100,1.591635497,0.161,1,0,0,1,52
96,4,12013,"FISH, Hamilton, Jr.",NY,13,25,200,-0.070518353,0.07,0,0,0,1,58
96,4,12022,"LUJ́N, Manuel, Jr.",NM,66,1,200,1.30494472,0.272,0,0,0,0,51
96,4,12025,"MIKVA, Abner Joseph",IL,21,10,100,-2.886397351,-0.441,0,0,0,1,61
96,4,12025,"MIKVA, Abner Joseph",IL,21,10,100,-2.886397351,-0.441,0,0,0,1,61
96,4,12027,"PREYER, Lunsford Richardson",NC,47,6,100,-1.057224948,-0.27,0,0,0,1,47
96,4,12029,"SEBELIUS, Keith George",KS,32,1,200,0.996291175,0.277,0,0,0,1,54
96,4,12030,"STOKES, Louis",OH,24,21,100,-4.215643932,-0.578,0,0,0,1,14
96,4,12033,"WHITEHURST, George William",VA,40,2,200,1.024469233,0.233,1,0,0,1,49
96,4,12035,"YATRON, Gus",PA,14,6,100,0.367860211,-0.174,0,1,0,0,50
96,4,12036,"OBEY, David Ross",WI,25,7,100,-2.097483932,-0.45,0,0,0,0,44
96,4,12037,"GOLDWATER, Barry Morris, Jr.",CA,71,20,200,1.505022565,0.355,0,0,0,0,60
96,4,12038,"JONES, Ed",TN,54,7,100,0.162386144,-0.245,0,0,0,0,42
96,4,12041,"CRANE, Philip Miller",IL,21,12,200,3.032657523,0.739,0,0,0,1,69
96,4,12042,"ROE, Robert A.",NJ,12,8,100,-0.708431256,-0.326,0,0,0,1,52
96,4,12046,"FORSYTHE, Edwin Bell",NJ,12,6,200,-0.024735306,0.326,0,0,0,0,52
96,4,13002,"ARCHER, William Reynolds, Jr.",TX,49,7,200,3.197062594,0.496,0,0,0,1,74
96,4,13003,"ASPIN, Leslie",WI,25,1,100,-2.11533676,-0.32,1,0,0,1,50
96,4,13009,"COTTER, William Ross",CT,1,1,100,-0.647342959,-0.313,0,0,0,0,47
96,4,13010,"DANIELSON, George Elmore",CA,71,30,100,-1.698732466,-0.477,0,0,0,1,40
96,4,13011,"DELLUMS, Ronald V.",CA,71,8,100,-3.502258206,-0.644,1,0,0,1,41
96,4,13013,"DRINAN, Robert Frederick",MA,3,4,100,-3.585432229,-0.422,0,0,0,0,43
96,4,13015,"FRENZEL, William Eldridge",MN,33,3,200,-0.030176692,0.353,0,0,0,1,51
96,4,13018,"HILLIS, Elwood Haynes",IN,22,5,200,1.028011223,0.173,1,0,0,1,57
96,4,13020,"KEMP, Jack French",NY,13,38,200,1.460362426,0.3,0,0,0,1,55
96,4,13021,"LENT, Norman Frederick",NY,13,4,200,1.152837489,0.183,0,0,0,1,51
96,4,13023,"MATHIS, Marvin Dawson",GA,44,2,100,0.979897346,-0.04,0,0,0,0,31
96,4,13024,"MAZZOLI, Romano Louis",KY,51,3,100,-0.6235934,-0.186,0,0,0,1,45
96,4,13026,"McCORMACK, Mike",WA,73,4,100,-1.269349772,-0.348,0,0,0,1,NA
96,4,13027,"McKAY, Koln Gunn",UT,67,1,100,-0.190264996,-0.254,0,0,0,1,67
96,4,13029,"McKINNEY, Stewart Brett",CT,1,4,200,-1.390699639,-0.006,0,0,0,1,57
96,4,13031,"MITCHELL, Parren James",MD,52,7,100,-3.230347463,-0.526,0,0,0,1,18
96,4,13032,"MURPHY, Morgan Francis",IL,21,2,100,-1.503662656,-0.399,0,0,0,1,17
96,4,13032,"MURPHY, Morgan Francis",IL,21,2,100,-1.503662656,-0.399,0,0,0,0,17
96,4,13033,"PEYSER, Peter A.",NY,13,23,100,-1.376238941,-0.359,0,0,0,1,48
96,4,13035,"RANGEL, Charles B.",NY,13,19,100,-3.264241686,-0.514,0,0,0,1,13
96,4,13036,"ROBINSON, James Kenneth",VA,40,7,200,2.312323606,0.333,0,0,0,1,55
96,4,13038,"RUNNELS, Harold Lowell",NM,66,2,100,1.369839611,0.091,1,0,0,1,52
96,4,13040,"SEIBERLING, John Frederick",OH,24,14,100,-3.931923527,-0.496,0,0,0,1,37
96,4,13042,"SPENCE, Floyd Davidson",SC,48,2,200,2.701672281,0.32,1,0,0,1,48
96,4,13047,"YOUNG, Charles William (Bill)",FL,43,6,200,1.759995323,0.325,0,0,0,1,51
96,4,13048,"DAVIS, Mendel Jackson",SC,48,1,100,0.001732966,-0.245,1,0,0,0,46
96,4,13055,"BUTLER, Manley Caldwell",VA,40,6,200,0.756737047,0.332,0,0,0,0,51
96,4,13056,"BREAUX, John Berlinger",LA,45,7,100,0.369021769,-0.123,0,0,0,0,39
96,4,14000,"ABDNOR, James",SD,37,2,200,1.896643452,0.241,0,0,0,0,52
96,4,14001,"ANDREWS, Ike Franklin",NC,47,4,100,-0.220067531,-0.178,0,0,0,1,49
96,4,14003,"BAFALIS, Louis Arthur (Skip)",FL,43,10,200,2.872254267,0.303,0,0,0,1,54
96,4,14004,"BEARD, Robin Leo, Jr.",TN,54,6,200,1.33997898,0.297,1,0,0,0,47
96,4,14005,"BOWEN, David Reece",MS,46,2,100,-0.707999586,-0.134,0,1,0,0,47
96,4,14007,"BURGENER, Clair Walter",CA,71,43,200,1.807160367,0.281,0,0,0,1,60
96,4,14013,"DANIEL, Robert Williams, Jr.",VA,40,4,200,3.016972968,0.318,1,0,0,1,41
96,4,14015,"GILMAN, Benjamin Arthur",NY,13,26,200,0.240935048,0.043,0,1,0,1,54
96,4,14016,"GINN, Ronald Bryan (Bo)",GA,44,1,100,0.187823239,-0.217,0,0,0,0,69
96,4,14018,"GUYER, Tennyson",OH,24,4,200,1.575910232,0.217,0,1,0,0,60
96,4,14021,"HOLT, Marjorie Sewell",MD,52,4,200,2.460389393,0.368,1,0,1,0,50
96,4,14022,"HOLTZMAN, Elizabeth",NY,13,16,100,-2.860637019,-0.493,0,0,1,0,29
96,4,14025,"JOHNSON, James Paul (Jim)",CO,62,4,200,-0.694318921,0.162,0,0,0,1,58
96,4,14026,"JONES, James Robert",OK,53,1,100,-0.113879988,-0.095,0,0,0,1,62
96,4,14029,"LEHMAN, William",FL,43,13,100,-2.010617662,-0.483,0,0,0,0,33
96,4,14031,"LOTT, Chester Trent",MS,46,5,200,2.950602705,0.39,0,0,0,0,53
96,4,14033,"MADIGAN, Edward Rell",IL,21,21,200,0.498527833,0.247,0,0,0,0,55
96,4,14035,"MARTIN, James Grubbs",NC,47,9,200,1.667519887,0.347,0,0,0,0,48
96,4,14038,"MITCHELL, Donald Jerome",NY,13,31,200,1.250939412,0.097,1,0,0,1,56
96,4,14039,"MOAKLEY, John Joseph",MA,3,9,100,-1.899272411,-0.418,0,0,0,1,44
96,4,14040,"MOORHEAD, Carlos John",CA,71,22,200,2.427823984,0.465,0,0,0,1,62
96,4,14041,"O'BRIEN, George Miller",IL,21,17,200,0.304703212,0.169,0,0,0,1,NA
96,4,14044,"PRITCHARD, Joel McFee",WA,73,1,200,-1.0267269,0.109,0,1,0,1,NA
96,4,14045,"REGULA, Ralph Straus",OH,24,16,200,0.899455206,0.221,0,0,0,1,52
96,4,14046,"RINALDO, Matthew John",NJ,12,12,200,0.339216029,0.023,0,0,0,0,54
96,4,14048,"ROSE, Charles Grandison, III",NC,47,7,100,-0.274360914,-0.319,0,0,0,0,33
96,4,14051,"SCHROEDER, Patricia Scott",CO,62,1,100,-1.074448108,-0.225,1,0,1,0,50
96,4,14052,"SHUSTER, E. G. (Bud)",PA,14,9,200,2.602621315,0.416,0,0,0,1,59
96,4,14053,"STARK, Fortney Hillman (Pete), Jr.",CA,71,9,100,-3.598538385,-0.631,0,0,0,1,44
96,4,14055,"STUDDS, Gerry Eastman",MA,3,12,100,-3.261487797,-0.444,0,1,0,0,47
96,4,14056,"SYMMS, Steven Douglas",ID,63,1,200,4.947816079,0.687,0,0,0,1,60
96,4,14057,"TAYLOR, Gene",MO,34,7,200,3.022081782,0.328,0,0,0,0,53
96,4,14060,"TREEN, David Conner",LA,45,3,200,0.895283793,0.34,1,0,0,1,55
96,4,14060,"TREEN, David Conner",LA,45,3,200,0.895283793,0.34,1,0,0,1,55
96,4,14062,"WILSON, Charles",TX,49,2,100,0.084160132,-0.196,0,0,0,1,42
96,4,14066,"YOUNG, Donald Edwin",AK,81,1,200,2.189432003,0.278,0,0,0,1,62
96,4,14067,"BOGGS, Corinne Claiborne (Lindy)",LA,45,2,100,-1.001611786,-0.359,0,0,1,0,44
96,4,14068,"COLLINS, Cardiss",IL,21,7,100,-3.540609238,-0.552,0,1,1,0,19
96,4,14069,"BAUMAN, Robert Edmund",MD,52,1,200,4.790375717,0.533,0,0,0,0,51
96,4,14070,"LUKEN, Thomas Andrew",OH,24,2,100,-0.330733777,-0.163,0,0,0,1,62
96,4,14071,"LAGOMARSINO, Robert John",CA,71,19,200,2.091434217,0.378,0,1,0,1,51
96,4,14072,"MURTHA, John Patrick, Jr.",PA,14,12,100,-0.544248502,-0.265,0,0,0,1,49
96,4,14075,"TRAXLER, Jerome Bob",MI,23,8,100,-0.84933354,-0.33,0,0,0,1,56
96,4,14076,"BURTON, John Lowell",CA,71,5,100,-2.235861966,-0.413,0,0,0,0,50
96,4,14200,"AMBRO, Jerome Anthony, Jr.",NY,13,3,100,-0.243742328,-0.19,0,0,0,1,54
96,4,14201,"AuCOIN, Les",OR,72,1,100,-2.07177157,-0.231,0,0,0,1,55
96,4,14202,"BALDUS, Alvin James",WI,25,3,100,-2.144684538,-0.383,0,0,0,1,50
96,4,14204,"BEARD, Edward Peter",RI,5,2,100,-0.034776176,-0.286,0,0,0,0,46
96,4,14205,"BEDELL, Berkley Warren",IA,31,6,100,-2.079386137,-0.24,0,1,0,1,54
96,4,14206,"BLANCHARD, James Johnston",MI,23,18,100,-1.796478372,-0.352,0,0,0,0,54
96,4,14208,"BONKER, Don Leroy",WA,73,3,100,-1.819206573,-0.336,0,1,0,1,NA
96,4,14209,"BRODHEAD, William McNulty",MI,23,17,100,-2.454598206,-0.463,0,0,0,0,50
96,4,14210,"CARR, Milton Robert (Bob)",MI,23,6,100,-2.692375998,-0.254,1,0,0,0,59
96,4,14212,"DERRICK, Butler Carson, Jr.",SC,48,3,100,-0.565325565,-0.215,0,0,0,0,41
96,4,14213,"DODD, Christopher John",CT,1,2,100,-1.827869069,-0.328,0,0,0,1,50
96,4,14214,"DOWNEY, Thomas Joseph",NY,13,2,100,-2.389802952,-0.384,0,0,0,0,55
96,4,14215,"FISHER, Joseph Lyman",VA,40,10,100,-1.605841481,-0.298,0,0,0,1,52
96,4,14216,"EARLY, Joseph Daniel",MA,3,3,100,-0.550523005,-0.254,0,0,0,1,39
96,4,14217,"EDGAR, Robert William",PA,14,7,100,-2.5227003,-0.334,0,0,0,0,54
96,4,14218,"EMERY, David Farnham",ME,2,1,200,0.783099662,0.155,1,0,0,0,51
96,4,14219,"ENGLISH, Glenn Lee, Jr.",OK,53,6,100,0.852161092,-0.027,0,0,0,0,NA
96,4,14220,"EVANS, David Walter",IN,22,6,100,0.363668834,-0.054,0,0,0,0,59
96,4,14221,"FENWICK, Millicent Hammond",NJ,12,5,200,-1.044143372,0.134,0,1,1,0,59
96,4,14222,"FITHIAN, Floyd James",IN,22,2,100,-1.008766942,-0.165,0,1,0,1,61
96,4,14223,"FLORIO, James Joseph",NJ,12,1,100,-1.004848853,-0.318,0,0,0,1,42
96,4,14224,"FORD, Harold Eugene",TN,54,8,100,-1.858784708,-0.438,0,0,0,0,35
96,4,14225,"GRADISON, Willis David, Jr.",OH,24,1,200,0.4791867,0.233,0,0,0,0,59
96,4,14226,"GRASSLEY, Charles Ernest",IA,31,3,200,1.612450942,0.341,0,0,0,0,52
96,4,14227,"HAGEDORN, Thomas Michael",MN,33,2,200,1.708846816,0.308,0,0,0,1,50
96,4,14230,"HARKIN, Thomas Richard (Tom)",IA,31,5,100,-1.658428056,-0.351,0,0,0,1,51
96,4,14231,"HARRIS, Herbert Eugene, II",VA,40,8,100,-1.819145645,-0.324,0,0,0,0,52
96,4,14233,"HEFNER, Willie Gathrel (Bill)",NC,47,8,100,-0.095680437,-0.264,0,0,0,0,45
96,4,14234,"HIGHTOWER, Jack English",TX,49,13,100,0.114191958,-0.115,0,0,0,1,51
96,4,14235,"HOLLAND, Kenneth Lamar",SC,48,5,100,-0.263054985,-0.246,0,0,0,0,39
96,4,14237,"HUBBARD, Carroll, Jr.",KY,51,1,100,0.459546167,-0.038,0,0,0,0,33
96,4,14238,"HUGHES, William John",NJ,12,2,100,-0.284970119,-0.153,0,0,0,0,49
96,4,14239,"HYDE, Henry John",IL,21,6,200,0.270759939,0.312,0,0,0,1,60
96,4,14240,"JEFFORDS, James Merrill",VT,6,1,200,-0.488693983,0.014,0,0,0,1,56
96,4,14241,"JENRETTE, John Wilson, Jr.",SC,48,6,100,0.061521482,-0.316,0,0,0,0,38
96,4,14243,"KELLY, Richard",FL,43,5,200,3.866902936,0.504,0,0,0,1,50
96,4,14245,"KINDNESS, Thomas Norman",OH,24,8,200,1.987502518,0.419,0,0,0,0,54
96,4,14248,"LaFALCE, John Joseph",NY,13,36,100,-1.524927711,-0.357,0,0,0,1,54
96,4,14249,"LEVITAS, Elliott Harris",GA,44,4,100,0.199407713,-0.056,0,0,0,1,43
96,4,14250,"LLOYD, James Fredrick",CA,71,35,100,-0.524349403,-0.218,1,0,0,1,56
96,4,14251,"LLOYD, Marilyn Laird",TN,54,3,100,0.838414252,-0.058,0,0,1,0,48
96,4,14252,"McDONALD, Lawrence Patton",GA,44,7,100,5.372104395,0.884,1,0,0,1,36
96,4,14253,"McHUGH, Matthew Francis",NY,13,27,100,-2.174577928,-0.353,0,0,0,0,55
96,4,14254,"MAGUIRE, Gene Andrew",NJ,12,7,100,-3.403455161,-0.338,0,0,0,0,58
96,4,14256,"MILLER, George",CA,71,7,100,-2.856498746,-0.552,0,0,0,0,48
96,4,14257,"MINETA, Norman Y.",CA,71,13,100,-2.05408324,-0.479,0,0,0,1,54
96,4,14258,"MOFFETT, Anthony John, Jr. (Toby)",CT,1,6,100,-2.871679216,-0.377,0,0,0,0,52
96,4,14259,"MOORE, William Henson, III",LA,45,6,200,1.334598673,0.24,0,0,0,1,45
96,4,14260,"MOTTL, Ronald Milton",OH,24,23,100,1.086705477,0.021,0,0,0,0,57
96,4,14262,"NEAL, Stephen Lybrook",NC,47,5,100,-0.515966319,-0.145,0,0,0,0,49
96,4,14263,"NOLAN, Richard Michael",MN,33,6,100,-3.411378089,-0.371,0,0,0,0,43
96,4,14264,"NOWAK, Henry James",NY,13,37,100,-1.500761535,-0.332,0,0,0,1,37
96,4,14265,"OBERSTAR, James Louis",MN,33,8,100,-2.266081781,-0.553,0,0,0,0,34
96,4,14266,"PATTERSON, Jerry Mumford",CA,71,38,100,-1.408457412,-0.367,0,0,0,1,56
96,4,14269,"RICHMOND, Frederick William",NY,13,14,100,-4.110071621,-0.564,0,0,0,1,22
96,4,14271,"RUSSO, Martin Anthony",IL,21,3,100,-0.404913784,-0.192,0,0,0,0,58
96,4,14272,"SANTINI, James David",NV,65,1,100,0.748001742,-0.074,0,0,0,1,52
96,4,14273,"SCHULZE, Richard Taylor",PA,14,5,200,1.853899309,0.271,0,0,0,1,61
96,4,14274,"SHARP, Philip Riley",IN,22,10,100,-0.870950156,-0.166,0,0,0,0,55
96,4,14275,"SIMON, Paul Martin",IL,21,24,100,-2.282678962,-0.397,0,0,0,0,46
96,4,14276,"SMITH, Virginia Dodd",NE,35,3,200,1.21881316,0.238,0,0,1,0,63
96,4,14277,"SOLARZ, Stephen Joshua",NY,13,13,100,-2.054274537,-0.429,0,1,0,0,28
96,4,14278,"SPELLMAN, Gladys Noon",MD,52,5,100,-1.429651539,-0.308,0,0,1,0,41
96,4,14280,"WAXMAN, Henry Arnold",CA,71,24,100,-2.132100379,-0.473,0,0,0,0,44
96,4,14281,"WEAVER, James Howard",OR,72,4,100,-0.876147108,-0.311,0,0,0,1,42
96,4,14282,"WIRTH, Timothy E.",CO,62,2,100,-2.049324552,-0.293,0,0,0,0,58
96,4,14283,"ZEFERETTI, Leo C.",NY,13,15,100,-0.277977953,-0.305,0,0,0,1,50
96,4,14284,"D'AMOURS, Norman Edward",NH,4,1,100,-0.542579085,-0.17,0,0,0,0,NA
96,4,14285,"FARY, John G.",IL,21,5,100,-1.420976356,-0.451,0,0,0,0,33
96,4,14288,"GOODLING, William Franklin",PA,14,19,200,0.647204678,0.336,0,1,0,1,60
96,4,14289,"LUNDINE, Stanley Nelson",NY,13,39,100,-2.050991733,-0.31,0,0,0,0,58
96,4,14290,"PAUL, Ronald Ernest",TX,49,22,200,1.070490212,0.863,0,0,0,1,50
96,4,14291,"HALL, Sam Blakeley, Jr.",TX,49,1,100,1.043521047,0.054,0,0,0,1,40
96,4,14400,"AKAKA, Daniel Kahikina",HI,82,2,100,-1.208241862,-0.419,0,0,0,1,47
96,4,14402,"APPLEGATE, Douglas Earl",OH,24,18,100,1.059789641,-0.106,0,0,0,0,45
96,4,14403,"BADHAM, Robert Edward",CA,71,40,200,2.543904116,0.541,1,0,0,1,68
96,4,14404,"BARNARD, Druie Douglas, Jr.",GA,44,10,100,0.564970385,-0.028,0,0,0,1,34
96,4,14405,"BEILENSON, Anthony Charles",CA,71,23,100,-4.130998006,-0.44,0,0,0,0,47
96,4,14406,"BENJAMIN, Adam, Jr.",IN,22,1,100,-0.253712905,-0.267,0,0,0,1,39
96,4,14407,"BONIOR, David Edward",MI,23,12,100,-3.163517944,-0.547,0,0,0,1,54
96,4,14409,"CAVANAUGH, John Joseph",NE,35,2,100,-2.005987768,-0.232,0,0,0,0,60
96,4,14410,"COLEMAN, Earl Thomas",MO,34,6,200,1.489942347,0.262,0,0,0,0,48
96,4,14411,"CORCORAN, Thomas Joseph",IL,21,15,200,1.00129116,0.319,0,0,0,1,40
96,4,14413,"DICKS, Norman DeValois",WA,73,6,100,-1.185886268,-0.312,0,0,0,0,NA
96,4,14414,"DORNAN, Robert Kenneth",CA,71,27,200,1.199066605,0.49,0,0,0,1,60
96,4,14415,"EDWARDS, Marvin Henry (Mickey)",OK,53,5,200,2.089604856,0.394,0,0,0,0,NA
96,4,14416,"ERTEL, Allen Edward",PA,14,17,100,-0.626701897,-0.171,0,0,0,1,58
96,4,14417,"EVANS, Thomas Beverley, Jr.",DE,11,1,200,0.414644543,0.178,0,0,0,1,47
96,4,14418,"EVANS, Billy Lee",GA,44,8,100,0.366782717,-0.091,0,0,0,0,25
96,4,14419,"FLIPPO, Ronnie Gene",AL,41,5,100,0.474903653,-0.175,0,0,0,0,32
96,4,14421,"GEPHARDT, Richard Andrew",MO,34,3,100,-1.401377608,-0.416,0,0,0,1,51
96,4,14422,"GLICKMAN, Daniel Robert",KS,32,4,100,-0.60174491,-0.133,0,0,0,0,51
96,4,14423,"GORE, Albert Arnold, Jr.",TN,54,4,100,-0.882499322,-0.316,0,0,0,1,32
96,4,14424,"GUDGER, Vonno Lamar, Jr.",NC,47,11,100,0.272958977,-0.154,0,0,0,1,46
96,4,14425,"HEFTEL, Cecil Landau",HI,82,1,100,-0.623404781,-0.269,0,0,0,1,51
96,4,14426,"HOLLENBECK, Harold Capistran",NJ,12,9,200,-0.628206774,-0.042,0,0,0,0,54
96,4,14427,"HUCKABY, Thomas Jerald",LA,45,5,100,0.71955387,-0.009,0,0,0,0,51
96,4,14429,"JENKINS, Edgar Lanier (Ed)",GA,44,9,100,0.575590351,-0.116,0,0,0,1,29
96,4,14430,"KILDEE, Dale Edward",MI,23,7,100,-2.131674168,-0.385,0,0,0,0,48
96,4,14431,"KOSTMAYER, Peter Houston",PA,14,8,100,-2.060627255,-0.298,0,0,0,0,53
96,4,14432,"LEACH, James Albert Smith",IA,31,1,200,-0.305380906,0.141,0,0,0,0,50
96,4,14434,"LEDERER, Raymond Francis",PA,14,3,100,-0.896206073,-0.391,0,0,0,0,32
96,4,14435,"MARKEY, Edward John",MA,3,7,100,-2.986699485,-0.5,0,0,0,1,41
96,4,14436,"MARKS, Marc Lincoln",PA,14,24,200,-0.376669208,-0.011,0,0,0,1,48
96,4,14437,"MARLENEE, Ronald Charles",MT,64,2,200,1.605356185,0.393,0,0,0,0,54
96,4,14438,"MARRIOTT, David Daniel",UT,67,2,200,1.294383314,0.264,0,0,0,0,63
96,4,14439,"MATTOX, James Albon",TX,49,5,100,-0.364340172,-0.19,0,0,0,0,NA
96,4,14440,"MIKULSKI, Barbara Ann",MD,52,3,100,-1.624450428,-0.37,0,0,1,0,48
96,4,14441,"MURPHY, Austin John",PA,14,22,100,0.193097315,-0.081,0,0,0,1,41
96,4,14442,"MYERS, Michael Joseph (Ozzie)",PA,14,1,100,-0.7555487,-0.418,0,0,0,0,29
96,4,14443,"OAKAR, Mary Rose",OH,24,20,100,-0.742745915,-0.4,0,0,1,0,38
96,4,14444,"PANETTA, Leon Edward",CA,71,16,100,-0.983517228,-0.258,0,0,0,1,50
96,4,14445,"PEASE, Donald James",OH,24,13,100,-2.203086804,-0.308,0,1,0,1,46
96,4,14446,"PURSELL, Carl Duane",MI,23,2,200,-0.755939006,0.12,0,0,0,1,55
96,4,14447,"QUAYLE, James Danforth (Dan)",IN,22,4,200,1.784829177,0.498,0,1,0,1,60
96,4,14448,"RAHALL, Nick Joe, II",WV,56,4,100,-0.713109178,-0.306,0,0,0,0,37
96,4,14449,"RUDD, Eldon Dean",AZ,61,4,200,3.106492478,0.422,0,0,0,1,62
96,4,14450,"SAWYER, Harold Samuel",MI,23,5,200,0.728351702,0.167,0,0,0,1,68
96,4,14451,"SKELTON, Isaac Newton, IV (Ike)",MO,34,4,100,0.075672771,-0.172,1,0,0,0,48
96,4,14453,"STOCKMAN, David Alan",MI,23,4,200,0.747706998,0.401,0,0,0,1,59
96,4,14456,"TRIBLE, Paul Seward, Jr.",VA,40,1,200,1.694438987,0.263,1,0,0,0,48
96,4,14458,"VENTO, Bruce Frank",MN,33,4,100,-2.536349969,-0.472,0,0,0,0,39
96,4,14459,"VOLKMER, Harold Lee",MO,34,9,100,-0.288638588,-0.196,0,0,0,1,50
96,4,14460,"WALGREN, Douglas",PA,14,18,100,-1.399757424,-0.247,0,0,0,0,55
96,4,14461,"WALKER, Robert Smith",PA,14,16,200,1.656742426,0.581,0,0,0,1,64
96,4,14462,"WATKINS, Wesley Wade",OK,53,3,100,0.819494811,-0.126,0,0,0,1,36
96,4,14463,"WEISS, Theodore S.",NY,13,20,100,-4.304896485,-0.564,0,0,0,1,23
96,4,14464,"WHITLEY, Charles Orville",NC,47,3,100,0.238071834,-0.175,0,0,0,1,41
96,4,14465,"YOUNG, Robert Anton, III",MO,34,2,100,-0.824207855,-0.3,0,0,0,1,57
96,4,14466,"STANGELAND, Arlan Ingehart",MN,33,7,200,1.621987113,0.346,0,0,0,0,43
96,4,14467,"FOWLER, Wyche, Jr.",GA,44,5,100,-0.675348921,-0.237,0,0,0,1,32
96,4,14469,"LIVINGSTON, Robert Linlithgow, Jr.",LA,45,1,200,1.413512306,0.326,0,0,0,1,49
96,4,14470,"GARCIA, Robert",NY,13,21,100,-3.778070778,-0.559,0,0,0,1,9
96,4,14471,"GREEN, Sedgwick William (Bill)",NY,13,18,200,-1.222620166,-0.044,0,0,0,1,37
96,4,14600,"ALBOSTA, Donald Joseph",MI,23,10,100,-0.342061349,-0.258,0,0,0,1,59
96,4,14601,"ANTHONY, Beryl Franklin, Jr.",AR,42,4,100,-0.226626853,-0.254,0,0,0,0,31
96,4,14602,"ATKINSON, Eugene Vincent",PA,14,25,100,0.288648159,-0.042,0,0,0,1,46
96,4,14603,"BAILEY, Donald Allen",PA,14,21,100,-0.075617354,-0.347,1,0,0,1,46
96,4,14604,"BARNES, Michael Darr",MD,52,8,100,-2.330397016,-0.343,0,1,0,0,48
96,4,14605,"BEREUTER, Douglas Kent",NE,35,1,200,0.475815489,0.231,0,0,0,1,59
96,4,14606,"BETHUNE, Edwin Ruthvin, Jr.",AR,42,2,200,1.777528401,0.304,0,0,0,1,32
96,4,14607,"BONER, William Hill",TN,54,5,100,-0.052901838,-0.228,0,0,0,0,37
96,4,14608,"BYRON, Beverly Barton Butcher",MD,52,6,100,0.919492524,-0.024,1,0,1,0,55
96,4,14609,"CAMPBELL, Carroll Ashmore, Jr.",SC,48,4,200,1.967183152,0.306,0,0,0,0,48
96,4,14610,"CARNEY, William",NY,13,1,200,2.698231373,0.326,0,0,0,1,54
96,4,14611,"CHENEY, Richard Bruce",WY,68,1,200,1.08314079,0.523,0,0,0,0,60
96,4,14612,"CLINGER, William Floyd, Jr.",PA,14,23,200,0.200507906,0.176,0,0,0,1,54
96,4,14613,"COELHO, Tony",CA,71,15,100,-0.966280923,-0.413,0,0,0,0,45
96,4,14614,"COURTER, James Andrew",NJ,12,13,200,1.334053433,0.269,1,0,0,0,59
96,4,14615,"CRANE, Daniel Bever",IL,21,22,200,3.129298164,0.744,0,0,0,1,51
96,4,14616,"DANNEMEYER, William Edwin",CA,71,39,200,1.984665262,0.691,0,0,0,1,64
96,4,14617,"DASCHLE, Thomas Andrew",SD,37,1,100,-0.742970167,-0.303,0,0,0,1,49
96,4,14618,"DAVIS, Robert William",MI,23,11,200,1.254347716,0.098,0,0,0,0,51
96,4,14619,"DECKARD, Huey Joel",IN,22,8,200,1.301302745,0.222,0,0,0,1,50
96,4,14620,"DIXON, Julian Carey",CA,71,28,100,-2.463498516,-0.458,0,0,0,1,29
96,4,14621,"DONNELLY, Brian Joseph",MA,3,11,100,-0.404322372,-0.291,0,0,0,0,41
96,4,14622,"DOUGHERTY, Charles Francis",PA,14,4,200,0.043622861,-0.018,1,0,0,1,43
96,4,14623,"ERDAHL, Arlen Ingolf",MN,33,1,200,-0.166675105,0.21,0,0,0,1,49
96,4,14624,"FAZIO, Victor Herbert, Jr.",CA,71,4,100,-1.634146437,-0.455,1,0,0,0,44
96,4,14625,"FERRARO, Geraldine Anne",NY,13,9,100,-0.938328165,-0.384,0,0,1,0,54
96,4,14626,"FROST, Jonas Martin",TX,49,24,100,-0.644079482,-0.316,0,0,0,1,NA
96,4,14627,"GINGRICH, Newton Leroy",GA,44,6,200,1.605767441,0.377,0,0,0,0,32
96,4,14629,"GRAY, William Herbert, III",PA,14,2,100,-3.517551029,-0.511,0,1,0,0,20
96,4,14630,"GRISHAM, Wayne Richard",CA,71,33,200,1.967653272,0.395,0,0,0,1,57
96,4,14631,"GUARINI, Frank Joseph, Jr.",NJ,12,14,100,-0.513530162,-0.295,0,0,0,1,43
96,4,14632,"HALL, Tony Patrick",OH,24,3,100,-1.696689844,-0.28,0,1,0,0,48
96,4,14633,"HANCE, Kent Ronald",TX,49,19,100,0.606163967,-0.042,0,0,0,0,58
96,4,14634,"HINSON, Jon Clifton",MS,46,4,200,2.177679627,0.318,0,0,0,1,55
96,4,14635,"HOPKINS, Larry Jones",KY,51,6,200,1.672921535,0.347,1,0,0,1,47
96,4,14636,"HUTTO, Earl Dewitt",FL,43,1,100,0.371723501,-0.007,1,0,0,1,51
96,4,14637,"JEFFRIES, James Edmund",KS,32,2,200,3.19405829,0.598,0,0,0,1,55
96,4,14638,"KOGOVSEK, Raymond Peter",CO,62,3,100,-1.09172073,-0.33,0,0,0,0,51
96,4,14639,"KRAMER, Kenneth Bentley",CO,62,5,200,2.571791629,0.43,0,0,0,1,60
96,4,14640,"LEACH, Anthony Claude, Jr.",LA,45,4,100,0.812493044,-0.051,1,0,0,1,54
96,4,14641,"LEATH, James Marvin",TX,49,11,100,1.867551553,0.049,0,0,0,1,43
96,4,14642,"LEE, Gary Alcide",NY,13,33,200,1.930925296,0.346,0,0,0,1,60
96,4,14643,"LELAND, George Thomas (Mickey)",TX,49,18,100,-3.477281674,-0.596,0,0,0,0,24
96,4,14644,"LEWIS, Charles Jeremy (Jerry)",CA,71,37,200,1.34030933,0.348,0,0,0,0,55
96,4,14645,"LOEFFLER, Thomas Gilbert",TX,49,21,200,2.710662462,0.425,0,0,0,0,NA
96,4,14646,"LOWRY, Michael Edward",WA,73,7,100,-2.017286579,-0.401,0,0,0,0,NA
96,4,14647,"LUNGREN, Daniel Edward",CA,71,34,200,2.086430471,0.497,0,0,0,0,57
96,4,14648,"MICA, Daniel Andrew",FL,43,11,100,-0.009096508,-0.184,0,1,0,0,50
96,4,14649,"MATSUI, Robert T.",CA,71,3,100,-2.108303298,-0.404,0,0,0,0,47
96,4,14650,"MAVROULES, Nicholas James",MA,3,6,100,-1.162856383,-0.342,1,0,0,0,45
96,4,14651,"NELSON, Clarence William (Bill)",FL,43,9,100,0.080322012,-0.192,0,0,0,1,54
96,4,14652,"PASHAYAN, Charles, Jr.",CA,71,17,200,1.271898563,0.282,0,0,0,1,54
96,4,14653,"RATCHFORD, William Richard",CT,1,5,100,-2.038552337,-0.355,0,0,0,0,56
96,4,14654,"RITTER, Donald Lawrence",PA,14,15,200,1.203510516,0.268,0,0,0,0,47
96,4,14655,"ROTH, Toby A.",WI,25,8,200,1.75573185,0.351,0,0,0,1,54
96,4,14656,"SABO, Martin Olav",MN,33,5,100,-3.212406836,-0.516,0,0,0,0,36
96,4,14657,"SENSENBRENNER, Frank James, Jr.",WI,25,9,200,1.490782311,0.646,0,0,0,0,60
96,4,14658,"SHANNON, James Michael",MA,3,5,100,-2.555624694,-0.465,0,0,0,0,41
96,4,14659,"SHELBY, Richard C.",AL,41,7,100,1.574717094,0.013,0,0,0,0,43
96,4,14660,"SHUMWAY, Norman David",CA,71,14,200,2.513513214,0.556,0,0,0,0,50
96,4,14661,"SNOWE, Olympia Jean",ME,2,2,200,0.484611585,0.091,0,0,1,0,50
96,4,14662,"SOLOMON, Gerald Brooks Hunt",NY,13,29,200,2.91723242,0.492,0,0,0,1,61
96,4,14663,"STACK, Edward John",FL,43,12,100,-1.064167875,-0.39,0,0,0,1,47
96,4,14664,"STENHOLM, Charles Walter",TX,49,17,100,1.576812164,0.019,0,0,0,0,43
96,4,14665,"STEWART, Bennett McVey",IL,21,1,100,-1.830721096,-0.526,0,0,0,0,10
96,4,14666,"SWIFT, Allan Byron",WA,73,2,100,-1.75641805,-0.43,0,0,0,0,NA
96,4,14667,"SYNAR, Michael Lynn",OK,53,2,100,-0.558083433,-0.321,0,0,0,0,46
96,4,14668,"TAUKE, Thomas Joseph",IA,31,2,200,0.408743412,0.27,0,0,0,0,50
96,4,14669,"THOMAS, William Marshall",CA,71,18,200,1.682707541,0.371,0,0,0,0,56
96,4,14670,"WHITTAKER, Robert Russell",KS,32,5,200,1.822686622,0.346,0,0,0,0,51
96,4,14671,"WILLIAMS, Lyle",OH,24,19,200,0.632752489,0.037,0,0,0,1,38
96,4,14672,"WILLIAMS, John Patrick",MT,64,1,100,-0.572248421,-0.315,0,0,0,1,54
96,4,14673,"WOLPE, Howard Eliot, III",MI,23,3,100,-2.065080695,-0.374,0,1,0,0,60
96,4,14674,"WYATT, Joseph Peyton, Jr.",TX,49,14,100,0.74372674,-0.116,1,0,0,1,42
96,4,14675,"PETRI, Thomas Evert",WI,25,6,200,0.463069292,0.379,0,0,0,0,52
96,4,14675,"PETRI, Thomas Evert",WI,25,6,200,0.463069292,0.379,0,0,0,0,52
96,4,14676,"ROYER, William Howard",CA,71,11,200,0.66320389,0.177,0,0,0,1,53
96,4,14676,"ROYER, William Howard",CA,71,11,200,0.66320389,0.177,0,0,0,1,53
96,4,14677,"PORTER, John Edward",IL,21,10,200,0.108304188,0.217,0,0,0,1,61
96,4,14677,"PORTER, John Edward",IL,21,10,200,0.108304188,0.217,0,0,0,1,61
96,4,14678,"MUSTO, Raphael John",PA,14,11,100,-0.797742866,-0.326,0,0,0,1,46
96,4,14678,"MUSTO, Raphael John",PA,14,11,100,-0.797742866,-0.326,0,0,0,1,46
96,4,14679,"TAUZIN, Wilbert Joseph (Billy)",LA,45,3,100,-0.189266257,0.03,0,0,0,0,55
96,4,14679,"TAUZIN, Wilbert Joseph (Billy)",LA,45,3,100,-0.189266257,0.03,0,0,0,0,55
96,4,14680,"HUTCHINSON, John Guiher",WV,56,3,100,-0.930125821,-0.222,0,0,0,1,42
96,4,14680,"HUTCHINSON, John Guiher",WV,56,3,100,-0.930125821,-0.222,0,0,0,1,42
96,4,14681,"CROCKETT, George William, Jr.",MI,23,13,100,-2.521919936,-0.651,0,1,0,0,11
96,4,14681,"CROCKETT, George William, Jr.",MI,23,13,100,-2.521919936,-0.651,0,1,0,0,11
96,4,94428,"IRELAND, Andrew Poysell (Andy)",FL,43,8,100,0.551383259,0.015,0,0,0,0,52
96,4,94454,"STUMP, Robert Lee",AZ,61,3,100,3.332028008,0.329,1,0,0,1,60
96,4,94628,"GRAMM, William Philip (Phil)",TX,49,6,100,1.281297626,0.215,0,0,0,0,NA
97,5,633,"BENNETT, Charles Edward",FL,43,3,100,1.034491542,-0.088,1,0,0,1,46
97,5,830,"BOLAND, Edward Patrick",MA,3,2,100,-1.360345576,-0.306,0,0,0,1,42
97,5,835,"BOLLING, Richard Walker",MO,34,5,100,-1.313363777,-0.504,0,0,0,1,35
97,5,1077,"BROOKS, Jack Bascom",TX,49,9,100,-0.50599915,-0.407,0,0,0,1,48
97,5,1087,"BROOMFIELD, William S.",MI,23,19,200,0.94882443,0.227,0,1,0,0,59
97,5,2009,"CONTE, Silvio Ottavio",MA,3,1,200,-1.053937698,-0.023,0,0,0,1,39
97,5,2525,"DERWINSKI, Edward Joseph",IL,21,4,200,0.708917895,0.342,0,1,0,1,57
97,5,2605,"DINGELL, John David, Jr.",MI,23,16,100,-1.182553621,-0.448,0,0,0,1,45
97,5,3078,"FASCELL, Dante Bruno",FL,43,15,100,-1.374730986,-0.4,0,1,0,1,55
97,5,3321,"FOUNTAIN, Lawrence H.",NC,47,2,100,1.17615958,-0.041,0,1,0,1,41
97,5,5101,"KASTENMEIER, Robert William",WI,25,2,100,-3.803114826,-0.514,0,0,0,1,41
97,5,5495,"LATTA, Delbert Leroy",OH,24,5,200,2.351842176,0.391,0,0,0,0,59
97,5,6455,"MICHEL, Robert Henry",IL,21,18,200,1.95040733,0.372,0,0,0,1,60
97,5,6584,"MOLLOHAN, Robert Homer",WV,56,1,100,0.631627748,-0.349,1,0,0,0,46
97,5,6845,"NATCHER, William Huston",KY,51,2,100,0.205302093,-0.288,0,0,0,1,50
97,5,7081,"O'NEILL, Thomas Philip, Jr. (Tip)",MA,3,8,100,-2.390347982,-0.402,0,0,0,0,31
97,5,7333,"PEPPER, Claude Denson",FL,43,14,100,-0.424797707,-0.422,0,0,0,0,55
97,5,7343,"PERKINS, Carl Dewey",KY,51,7,100,-0.121044281,-0.343,0,0,0,1,43
97,5,7610,"PRICE, Charles Melvin",IL,21,23,100,0.516162594,-0.429,1,0,0,1,47
97,5,7824,"REUSS, Henry Schoellkopf",WI,25,5,100,-2.677341801,-0.481,0,0,0,1,31
97,5,7845,"RHODES, John Jacob",AZ,61,1,200,1.601282914,0.225,0,0,0,1,62
97,5,8010,"RODINO, Peter Wallace, Jr.",NJ,12,10,100,-3.350643775,-0.435,0,0,0,1,22
97,5,8080,"ROSTENKOWSKI, Daniel David",IL,21,8,100,-0.750857706,-0.39,0,0,0,1,24
97,5,8672,"SMITH, Neal Edward",IA,31,4,100,-1.377330907,-0.313,0,0,0,1,46
97,5,9017,"STRATTON, Samuel Studdiford",NY,13,28,100,1.083740574,-0.139,1,0,0,1,40
97,5,9802,"WAMPLER, William Creed",VA,40,9,200,1.595726845,0.146,0,0,0,1,49
97,5,10075,"WHITTEN, Jamie Lloyd",MS,46,1,100,0.060790864,-0.161,0,0,0,0,42
97,5,10391,"WRIGHT, James Claude, Jr.",TX,49,12,100,-0.079705306,-0.383,0,0,0,1,52
97,5,10421,"YATES, Sidney Richard",IL,21,9,100,-3.330702445,-0.494,0,0,0,1,33
97,5,10463,"ZABLOCKI, Clement John",WI,25,4,100,-0.289079102,-0.355,0,1,0,0,44
97,5,10500,"ADDABBO, Joseph Patrick",NY,13,7,100,-1.963247049,-0.402,0,0,0,0,31
97,5,10502,"ASHBROOK, John Milan",OH,24,17,200,3.7714008,0.612,0,0,0,1,59
97,5,10517,"FINDLEY, Paul",IL,21,20,200,-0.603637068,0.246,0,1,0,1,58
97,5,10520,"GONŹLEZ, Henry B.",TX,49,20,100,-0.614917697,-0.538,0,0,0,0,22
97,5,10551,"ROSENTHAL, Benjamin Stanley",NY,13,8,100,-3.086189174,-0.562,0,1,0,1,44
97,5,10553,"ROUSSELOT, John Harbin",CA,71,26,200,2.629450307,0.601,0,0,0,0,64
97,5,10561,"ST. GERMAIN, Fernand Joseph",RI,5,1,100,-1.488744482,-0.355,0,0,0,1,37
97,5,10566,"UDALL, Morris King",AZ,61,2,100,-1.079515407,-0.387,0,0,0,1,51
97,5,10573,"BROWN, George Edward, Jr.",CA,71,36,100,-2.157970603,-0.506,0,0,0,1,53
97,5,10574,"BROYHILL, James Thomas",NC,47,10,200,1.233722729,0.269,0,0,0,0,55
97,5,10577,"BURTON, Phillip",CA,71,6,100,-4.097722107,-0.634,0,0,0,1,33
97,5,10579,"CLAUSEN, Donald Holst",CA,71,2,200,0.839080222,0.16,0,0,0,1,50
97,5,10583,"EDWARDS, William Donlon (Don)",CA,71,10,100,-3.746034219,-0.599,0,0,0,1,45
97,5,10587,"FUQUA, Don",FL,43,2,100,0.232135364,-0.173,0,0,0,1,42
97,5,10588,"GIBBONS, Sam Melville",FL,43,7,100,0.127193701,-0.233,0,0,0,1,52
97,5,10595,"HAWKINS, Augustus Freeman (Gus)",CA,71,29,100,-1.923047636,-0.517,0,0,0,0,17
97,5,10596,"HORTON, Frank Jefferson",NY,13,34,200,-0.446249597,-0.004,0,0,0,1,42
97,5,10601,"LONG, Clarence Dickinson",MD,52,2,100,-0.750503978,-0.274,0,0,0,1,46
97,5,10602,"LONG, Gillis William",LA,45,8,100,-0.306858552,-0.368,0,0,0,1,45
97,5,10606,"McCLORY, Robert",IL,21,13,200,0.812569471,0.256,0,0,0,1,61
97,5,10607,"McDADE, Joseph Michael",PA,14,10,200,0.061596197,0.093,0,0,0,0,54
97,5,10609,"MINISH, Joseph George",NJ,12,11,100,-1.363477786,-0.299,0,0,0,1,50
97,5,10614,"PICKLE, James Jarrell (Jake)",TX,49,10,100,0.091904021,-0.218,0,0,0,1,48
97,5,10616,"QUILLEN, James Henry",TN,54,1,200,1.719022972,0.246,0,0,0,1,61
97,5,10621,"ROYBAL, Edward R.",CA,71,25,100,-3.398191728,-0.61,0,0,0,1,35
97,5,10626,"SNYDER, Marion Gene",KY,51,4,200,1.243153505,0.26,0,0,0,0,57
97,5,10703,"ANNUNZIO, Frank",IL,21,11,100,-0.054930443,-0.398,0,0,0,0,45
97,5,10705,"BINGHAM, Jonathan Brewster",NY,13,22,100,-2.92633148,-0.509,0,1,0,1,29
97,5,10712,"CONABLE, Barber Benjamin, Jr.",NY,13,35,200,0.627958458,0.371,0,0,0,1,46
97,5,10713,"CONYERS, John, Jr.",MI,23,1,100,-3.298004839,-0.658,0,0,0,1,5
97,5,10716,"de la GARZA, Eligio, II (Kika)",TX,49,15,100,0.645524324,-0.255,0,0,0,1,42
97,5,10717,"DICKINSON, William Louis",AL,41,2,200,2.545592834,0.398,1,0,0,1,52
97,5,10719,"DUNCAN, John James",TN,54,2,200,2.3558262,0.194,0,0,0,1,58
97,5,10721,"EDWARDS, William Jackson (Jack)",AL,41,1,200,1.188978584,0.177,0,0,0,1,56
97,5,10722,"ERLENBORN, John Neal",IL,21,14,200,1.00126128,0.315,0,0,0,1,64
97,5,10726,"FOLEY, Thomas Stephen",WA,73,5,100,-0.745091373,-0.354,0,0,0,0,56
97,5,10727,"FORD, William David",MI,23,15,100,-2.169020971,-0.516,0,0,0,1,48
97,5,10732,"HAMILTON, Lee Herbert",IN,22,9,100,-0.584553434,-0.171,0,1,0,0,54
97,5,10734,"HANSEN, George Vernon",ID,63,2,200,4.170521182,0.621,0,0,0,1,72
97,5,10739,"HOWARD, James John",NJ,12,3,100,-1.478908386,-0.431,0,0,0,1,57
97,5,10742,"JACOBS, Andrew, Jr.",IN,22,11,100,-1.453048507,-0.07,0,0,0,1,54
97,5,10760,"OTTINGER, Richard Lawrence",NY,13,24,100,-3.536032233,-0.391,0,0,0,0,52
97,5,10768,"SCHEUER, James Haas",NY,13,11,100,-1.884870275,-0.478,0,0,0,1,41
97,5,10773,"STANTON, John William",OH,24,11,200,0.87524558,0.135,0,0,0,1,52
97,5,10783,"WHITE, Richard Crawford",TX,49,16,100,1.799617211,-0.137,1,0,0,1,56
97,5,10786,"BROWN, Clarence J., Jr.",OH,24,7,200,1.800483806,0.3,0,0,0,1,54
97,5,10788,"JONES, Walter Beaman, Sr.",NC,47,1,100,0.189227728,-0.259,0,0,0,0,46
97,5,10794,"VANDER JAGT, Guy Adrian",MI,23,9,200,0.846208449,0.247,0,0,0,0,60
97,5,11000,"BEVILL, Tom",AL,41,4,100,1.134518218,-0.213,0,0,0,1,46
97,5,11005,"BRINKLEY, Jack Thomas",GA,44,3,100,1.226380821,-0.073,1,0,0,1,37
97,5,11020,"HAMMERSCHMIDT, John Paul",AR,42,3,200,1.844691194,0.253,0,0,0,1,58
97,5,11021,"HECKLER, Margaret M.",MA,3,10,200,-1.324652248,-0.007,0,0,1,0,45
97,5,11023,"KAZEN, Abraham, Jr.",TX,49,23,100,1.53785057,-0.219,1,0,0,1,49
97,5,11034,"MILLER, Clarence E.",OH,24,10,200,0.85966832,0.416,0,0,0,0,55
97,5,11035,"MONTGOMERY, Gillespie V. (Sonny)",MS,46,3,100,2.243188685,0.017,1,0,0,1,51
97,5,11036,"MYERS, John Thomas",IN,22,7,200,1.893772745,0.236,0,0,0,1,57
97,5,11037,"NICHOLS, William Flynt",AL,41,3,100,1.609758101,-0.042,1,0,0,1,46
97,5,11041,"RAILSBACK, Thomas Fisher",IL,21,19,200,-0.632670469,0.103,0,0,0,1,57
97,5,11057,"WINN, Edward Lawrence, Jr. (Larry)",KS,32,3,200,1.151551491,0.247,0,1,0,0,55
97,5,11058,"WYLIE, Chalmers Pangburn",OH,24,15,200,0.400038064,0.23,0,0,0,1,55
97,5,11063,"McCLOSKEY, Paul Norton , Jr. (Pete)",CA,71,12,200,-0.374516002,0.028,0,0,0,1,46
97,5,11066,"COLLINS, James Mitchell",TX,49,3,200,2.621362355,0.679,0,0,0,1,73
97,5,11067,"GAYDOS, Joseph Matthew",PA,14,20,100,0.120561043,-0.278,0,0,0,1,43
97,5,12000,"ALEXANDER, William Vollie (Bill), Jr.",AR,42,1,100,-0.202767057,-0.41,0,0,0,1,44
97,5,12001,"ANDERSON, Glenn Malcolm",CA,71,32,100,-0.38761608,-0.269,0,0,0,1,48
97,5,12003,"BIAGGI, Mario",NY,13,10,100,-1.039630283,-0.339,0,0,0,0,44
97,5,12007,"CHAPPELL, William Venroe, Jr.",FL,43,4,100,1.191721242,-0.098,0,0,0,1,57
97,5,12008,"CHISHOLM, Shirley Anita",NY,13,12,100,-3.473479827,-0.605,0,0,1,0,16
97,5,12009,"CLAY, William Lacy, Sr.",MO,34,1,100,-4.355011926,-0.49,0,0,0,1,24
97,5,12010,"COUGHLIN, Robert Lawrence",PA,14,13,200,-0.237053465,0.204,0,0,0,1,56
97,5,12011,"DANIEL, Wilbur Clarence (Dan)",VA,40,5,100,2.700682456,0.161,1,0,0,1,57
97,5,12013,"FISH, Hamilton, Jr.",NY,13,25,200,0.041257714,0.07,0,0,0,1,58
97,5,12022,"LUJ́N, Manuel, Jr.",NM,66,1,200,0.809597195,0.272,0,0,0,0,51
97,5,12030,"STOKES, Louis",OH,24,21,100,-4.674725101,-0.578,0,0,0,1,11
97,5,12033,"WHITEHURST, George William",VA,40,2,200,1.620507502,0.233,1,0,0,1,51
97,5,12035,"YATRON, Gus",PA,14,6,100,-0.022453306,-0.174,0,1,0,0,56
97,5,12036,"OBEY, David Ross",WI,25,7,100,-1.929818432,-0.45,0,0,0,0,46
97,5,12037,"GOLDWATER, Barry Morris, Jr.",CA,71,20,200,0.706902932,0.355,0,0,0,0,63
97,5,12038,"JONES, Ed",TN,54,7,100,0.536599313,-0.245,0,0,0,0,50
97,5,12041,"CRANE, Philip Miller",IL,21,12,200,2.985998539,0.739,0,0,0,1,62
97,5,12042,"ROE, Robert A.",NJ,12,8,100,-0.945868103,-0.326,0,0,0,1,52
97,5,12046,"FORSYTHE, Edwin Bell",NJ,12,6,200,-1.485064303,0.326,0,0,0,0,55
97,5,13002,"ARCHER, William Reynolds, Jr.",TX,49,7,200,2.556007912,0.496,0,0,0,1,74
97,5,13003,"ASPIN, Leslie",WI,25,1,100,-1.462663688,-0.32,1,0,0,1,50
97,5,13010,"DANIELSON, George Elmore",CA,71,30,100,-1.080513901,-0.477,0,0,0,1,44
97,5,13010,"DANIELSON, George Elmore",CA,71,30,100,-1.080513901,-0.477,0,0,0,1,44
97,5,13011,"DELLUMS, Ronald V.",CA,71,8,100,-4.236825838,-0.644,1,0,0,1,32
97,5,13015,"FRENZEL, William Eldridge",MN,33,3,200,0.009974856,0.353,0,0,0,1,45
97,5,13018,"HILLIS, Elwood Haynes",IN,22,5,200,1.557062151,0.173,1,0,0,1,63
97,5,13020,"KEMP, Jack French",NY,13,38,200,1.871635309,0.3,0,0,0,1,48
97,5,13021,"LENT, Norman Frederick",NY,13,4,200,0.853019469,0.183,0,0,0,1,58
97,5,13024,"MAZZOLI, Romano Louis",KY,51,3,100,-0.822715313,-0.186,0,0,0,1,40
97,5,13029,"McKINNEY, Stewart Brett",CT,1,4,200,-1.416543013,-0.006,0,0,0,1,53
97,5,13031,"MITCHELL, Parren James",MD,52,7,100,-4.336609183,-0.526,0,0,0,1,11
97,5,13033,"PEYSER, Peter A.",NY,13,23,100,-1.136626147,-0.359,0,0,0,1,51
97,5,13035,"RANGEL, Charles B.",NY,13,19,100,-3.946509479,-0.514,0,0,0,1,12
97,5,13036,"ROBINSON, James Kenneth",VA,40,7,200,2.118668124,0.333,0,0,0,1,57
97,5,13040,"SEIBERLING, John Frederick",OH,24,14,100,-3.67133123,-0.496,0,0,0,1,41
97,5,13042,"SPENCE, Floyd Davidson",SC,48,2,200,2.866715491,0.32,1,0,0,1,52
97,5,13047,"YOUNG, Charles William (Bill)",FL,43,6,200,1.875091027,0.325,0,0,0,1,53
97,5,13055,"BUTLER, Manley Caldwell",VA,40,6,200,1.554994673,0.332,0,0,0,0,53
97,5,13056,"BREAUX, John Berlinger",LA,45,7,100,1.119303621,-0.123,0,0,0,0,49
97,5,14001,"ANDREWS, Ike Franklin",NC,47,4,100,0.31432452,-0.178,0,0,0,1,48
97,5,14003,"BAFALIS, Louis Arthur (Skip)",FL,43,10,200,2.221827132,0.303,0,0,0,1,64
97,5,14004,"BEARD, Robin Leo, Jr.",TN,54,6,200,2.650435389,0.297,1,0,0,0,53
97,5,14005,"BOWEN, David Reece",MS,46,2,100,0.340310581,-0.134,0,1,0,0,46
97,5,14007,"BURGENER, Clair Walter",CA,71,43,200,2.042352721,0.281,0,0,0,1,66
97,5,14013,"DANIEL, Robert Williams, Jr.",VA,40,4,200,3.716435982,0.318,1,0,0,1,46
97,5,14015,"GILMAN, Benjamin Arthur",NY,13,26,200,0.370009287,0.043,0,1,0,1,56
97,5,14016,"GINN, Ronald Bryan (Bo)",GA,44,1,100,0.788536809,-0.217,0,0,0,0,43
97,5,14021,"HOLT, Marjorie Sewell",MD,52,4,200,2.127337387,0.368,1,0,1,0,50
97,5,14026,"JONES, James Robert",OK,53,1,100,0.012073684,-0.095,0,0,0,1,66
97,5,14029,"LEHMAN, William",FL,43,13,100,-2.176490678,-0.483,0,0,0,0,42
97,5,14031,"LOTT, Chester Trent",MS,46,5,200,2.912935435,0.39,0,0,0,0,58
97,5,14033,"MADIGAN, Edward Rell",IL,21,21,200,1.187175494,0.247,0,0,0,0,50
97,5,14035,"MARTIN, James Grubbs",NC,47,9,200,1.307782203,0.347,0,0,0,0,49
97,5,14038,"MITCHELL, Donald Jerome",NY,13,31,200,1.20469725,0.097,1,0,0,1,50
97,5,14039,"MOAKLEY, John Joseph",MA,3,9,100,-2.04487528,-0.418,0,0,0,1,40
97,5,14040,"MOORHEAD, Carlos John",CA,71,22,200,3.307870667,0.465,0,0,0,1,61
97,5,14041,"O'BRIEN, George Miller",IL,21,17,200,0.533497321,0.169,0,0,0,1,58
97,5,14043,"PARRIS, Stanford E.",VA,40,8,200,1.293361362,0.287,0,0,0,1,56
97,5,14044,"PRITCHARD, Joel McFee",WA,73,1,200,-0.767518768,0.109,0,1,0,1,43
97,5,14045,"REGULA, Ralph Straus",OH,24,16,200,0.856761639,0.221,0,0,0,1,56
97,5,14046,"RINALDO, Matthew John",NJ,12,12,200,-0.395127272,0.023,0,0,0,0,53
97,5,14048,"ROSE, Charles Grandison, III",NC,47,7,100,-0.344659654,-0.319,0,0,0,0,43
97,5,14051,"SCHROEDER, Patricia Scott",CO,62,1,100,-2.449841438,-0.225,1,0,1,0,43
97,5,14052,"SHUSTER, E. G. (Bud)",PA,14,9,200,1.295558563,0.416,0,0,0,1,62
97,5,14053,"STARK, Fortney Hillman (Pete), Jr.",CA,71,9,100,-3.529762434,-0.631,0,0,0,1,45
97,5,14055,"STUDDS, Gerry Eastman",MA,3,12,100,-3.169178266,-0.444,0,1,0,0,46
97,5,14057,"TAYLOR, Gene",MO,34,7,200,2.442089824,0.328,0,0,0,0,60
97,5,14062,"WILSON, Charles",TX,49,2,100,1.127351853,-0.196,0,0,0,1,50
97,5,14066,"YOUNG, Donald Edwin",AK,81,1,200,1.283702008,0.278,0,0,0,1,55
97,5,14067,"BOGGS, Corinne Claiborne (Lindy)",LA,45,2,100,-0.078493983,-0.359,0,0,1,0,43
97,5,14068,"COLLINS, Cardiss",IL,21,7,100,-3.523498072,-0.552,0,0,1,0,17
97,5,14070,"LUKEN, Thomas Andrew",OH,24,2,100,-0.396675401,-0.163,0,0,0,1,60
97,5,14071,"LAGOMARSINO, Robert John",CA,71,19,200,2.195730648,0.378,0,1,0,1,54
97,5,14072,"MURTHA, John Patrick, Jr.",PA,14,12,100,0.477851549,-0.265,0,0,0,1,50
97,5,14075,"TRAXLER, Jerome Bob",MI,23,8,100,-1.530394578,-0.33,0,0,0,1,53
97,5,14076,"BURTON, John Lowell",CA,71,5,100,-3.843439693,-0.413,0,0,0,0,38
97,5,14201,"AuCOIN, Les",OR,72,1,100,-2.936123109,-0.231,0,0,0,1,48
97,5,14205,"BEDELL, Berkley Warren",IA,31,6,100,-2.544671917,-0.24,0,0,0,1,58
97,5,14206,"BLANCHARD, James Johnston",MI,23,18,100,-1.779930202,-0.352,0,0,0,0,49
97,5,14208,"BONKER, Don Leroy",WA,73,3,100,-1.664110281,-0.336,0,1,0,1,50
97,5,14209,"BRODHEAD, William McNulty",MI,23,17,100,-2.910660664,-0.463,0,0,0,0,41
97,5,14212,"DERRICK, Butler Carson, Jr.",SC,48,3,100,-0.277964308,-0.215,0,0,0,0,48
97,5,14214,"DOWNEY, Thomas Joseph",NY,13,2,100,-2.072040742,-0.384,0,0,0,0,58
97,5,14216,"EARLY, Joseph Daniel",MA,3,3,100,-1.896005948,-0.254,0,0,0,1,41
97,5,14217,"EDGAR, Robert William",PA,14,7,100,-3.702476075,-0.334,0,0,0,0,55
97,5,14218,"EMERY, David Farnham",ME,2,1,200,1.068011963,0.155,1,0,0,0,45
97,5,14219,"ENGLISH, Glenn Lee, Jr.",OK,53,6,100,0.663285588,-0.027,0,0,0,0,68
97,5,14220,"EVANS, David Walter",IN,22,6,100,-1.131750444,-0.054,0,0,0,0,62
97,5,14221,"FENWICK, Millicent Hammond",NJ,12,5,200,-1.235957302,0.134,0,1,1,0,56
97,5,14222,"FITHIAN, Floyd James",IN,22,2,100,-1.144938161,-0.165,0,0,0,1,64
97,5,14223,"FLORIO, James Joseph",NJ,12,1,100,-1.456974881,-0.318,0,0,0,1,47
97,5,14224,"FORD, Harold Eugene",TN,54,8,100,-2.775789454,-0.438,0,0,0,0,29
97,5,14225,"GRADISON, Willis David, Jr.",OH,24,1,200,0.721452794,0.233,0,0,0,0,55
97,5,14227,"HAGEDORN, Thomas Michael",MN,33,2,200,1.102128126,0.308,0,0,0,1,51
97,5,14230,"HARKIN, Thomas Richard (Tom)",IA,31,5,100,-2.884507983,-0.351,0,0,0,1,55
97,5,14233,"HEFNER, Willie Gathrel (Bill)",NC,47,8,100,0.524713968,-0.264,0,0,0,0,52
97,5,14234,"HIGHTOWER, Jack English",TX,49,13,100,0.347883126,-0.115,0,0,0,1,62
97,5,14235,"HOLLAND, Kenneth Lamar",SC,48,5,100,0.843494754,-0.246,0,0,0,0,44
97,5,14237,"HUBBARD, Carroll, Jr.",KY,51,1,100,1.348083267,-0.038,0,0,0,0,44
97,5,14238,"HUGHES, William John",NJ,12,2,100,-0.906661048,-0.153,0,0,0,0,55
97,5,14239,"HYDE, Henry John",IL,21,6,200,1.774644707,0.312,0,1,0,1,52
97,5,14240,"JEFFORDS, James Merrill",VT,6,1,200,-1.075063132,0.014,0,0,0,1,44
97,5,14245,"KINDNESS, Thomas Norman",OH,24,8,200,1.845975422,0.419,0,0,0,0,57
97,5,14248,"LaFALCE, John Joseph",NY,13,36,100,-1.388185012,-0.357,0,0,0,1,45
97,5,14249,"LEVITAS, Elliott Harris",GA,44,4,100,0.219196884,-0.056,0,0,0,1,44
97,5,14251,"LLOYD, Marilyn Laird",TN,54,3,100,1.114463791,-0.058,1,0,1,0,56
97,5,14252,"McDONALD, Lawrence Patton",GA,44,7,100,4.593795754,0.884,1,0,0,1,47
97,5,14253,"McHUGH, Matthew Francis",NY,13,27,100,-1.402847314,-0.353,0,0,0,0,48
97,5,14256,"MILLER, George",CA,71,7,100,-3.599338262,-0.552,0,0,0,0,59
97,5,14257,"MINETA, Norman Y.",CA,71,13,100,-1.368798667,-0.479,0,0,0,1,53
97,5,14258,"MOFFETT, Anthony John, Jr. (Toby)",CT,1,6,100,-3.438086983,-0.377,0,0,0,0,47
97,5,14259,"MOORE, William Henson, III",LA,45,6,200,1.260538486,0.24,0,0,0,1,50
97,5,14260,"MOTTL, Ronald Milton",OH,24,23,100,0.113349434,0.021,0,0,0,0,57
97,5,14262,"NEAL, Stephen Lybrook",NC,47,5,100,0.058123418,-0.145,0,0,0,0,54
97,5,14264,"NOWAK, Henry James",NY,13,37,100,-1.940758285,-0.332,0,0,0,1,26
97,5,14265,"OBERSTAR, James Louis",MN,33,8,100,-3.053964802,-0.553,0,0,0,0,35
97,5,14266,"PATTERSON, Jerry Mumford",CA,71,38,100,-1.255299416,-0.367,0,0,0,1,63
97,5,14269,"RICHMOND, Frederick William",NY,13,14,100,-5.60942459,-0.564,0,0,0,1,20
97,5,14271,"RUSSO, Martin Anthony",IL,21,3,100,-1.91623059,-0.192,0,0,0,0,52
97,5,14272,"SANTINI, James David",NV,65,1,100,0.246467629,-0.074,0,0,0,1,63
97,5,14273,"SCHULZE, Richard Taylor",PA,14,5,200,1.32083838,0.271,0,0,0,1,61
97,5,14274,"SHARP, Philip Riley",IN,22,10,100,-0.956974649,-0.166,0,0,0,0,59
97,5,14275,"SIMON, Paul Martin",IL,21,24,100,-1.771871447,-0.397,0,0,0,0,57
97,5,14276,"SMITH, Virginia Dodd",NE,35,3,200,0.087307912,0.238,0,0,1,0,73
97,5,14277,"SOLARZ, Stephen Joshua",NY,13,13,100,-1.477153186,-0.429,0,1,0,0,47
97,5,14280,"WAXMAN, Henry Arnold",CA,71,24,100,-2.144101376,-0.473,0,0,0,0,41
97,5,14281,"WEAVER, James Howard",OR,72,4,100,-3.115989295,-0.311,0,0,0,1,51
97,5,14282,"WIRTH, Timothy E.",CO,62,2,100,-2.117246858,-0.293,0,0,0,0,54
97,5,14283,"ZEFERETTI, Leo C.",NY,13,15,100,-0.215355172,-0.305,0,0,0,1,51
97,5,14284,"D'AMOURS, Norman Edward",NH,4,1,100,-0.821748691,-0.17,0,0,0,0,60
97,5,14285,"FARY, John G.",IL,21,5,100,0.087655357,-0.451,0,0,0,0,28
97,5,14288,"GOODLING, William Franklin",PA,14,19,200,-0.401867956,0.336,0,1,0,1,60
97,5,14289,"LUNDINE, Stanley Nelson",NY,13,39,100,-2.278770526,-0.31,0,0,0,0,54
97,5,14290,"PAUL, Ronald Ernest",TX,49,22,200,0.020944054,0.863,0,0,0,1,57
97,5,14291,"HALL, Sam Blakeley, Jr.",TX,49,1,100,0.897890573,0.054,0,0,0,1,49
97,5,14400,"AKAKA, Daniel Kahikina",HI,82,2,100,-0.300838917,-0.419,0,0,0,1,42
97,5,14402,"APPLEGATE, Douglas Earl",OH,24,18,100,0.163651419,-0.106,0,0,0,0,49
97,5,14403,"BADHAM, Robert Edward",CA,71,40,200,2.414725086,0.541,1,0,0,1,69
97,5,14404,"BARNARD, Druie Douglas, Jr.",GA,44,10,100,1.447397248,-0.028,0,0,0,1,41
97,5,14405,"BEILENSON, Anthony Charles",CA,71,23,100,-3.247712405,-0.44,0,0,0,0,46
97,5,14406,"BENJAMIN, Adam, Jr.",IN,22,1,100,-0.797100547,-0.267,0,0,0,1,41
97,5,14406,"BENJAMIN, Adam, Jr.",IN,22,1,100,-0.797100547,-0.267,0,0,0,1,41
97,5,14407,"BONIOR, David Edward",MI,23,12,100,-2.776020009,-0.547,0,0,0,1,54
97,5,14410,"COLEMAN, Earl Thomas",MO,34,6,200,1.000134016,0.262,0,0,0,0,52
97,5,14411,"CORCORAN, Thomas Joseph",IL,21,15,200,1.664795962,0.319,0,0,0,1,64
97,5,14413,"DICKS, Norman DeValois",WA,73,6,100,-0.43307389,-0.312,0,0,0,0,50
97,5,14414,"DORNAN, Robert Kenneth",CA,71,27,200,1.762527512,0.49,0,1,0,1,57
97,5,14415,"EDWARDS, Marvin Henry (Mickey)",OK,53,5,200,1.74185929,0.394,0,0,0,0,66
97,5,14416,"ERTEL, Allen Edward",PA,14,17,100,-0.764582304,-0.171,0,0,0,1,59
97,5,14417,"EVANS, Thomas Beverley, Jr.",DE,11,1,200,0.273441095,0.178,0,0,0,1,47
97,5,14418,"EVANS, Billy Lee",GA,44,8,100,1.142549896,-0.091,0,0,0,0,34
97,5,14419,"FLIPPO, Ronnie Gene",AL,41,5,100,1.311052893,-0.175,0,0,0,0,41
97,5,14421,"GEPHARDT, Richard Andrew",MO,34,3,100,-0.054545316,-0.416,0,0,0,1,51
97,5,14422,"GLICKMAN, Daniel Robert",KS,32,4,100,-1.163231946,-0.133,0,0,0,0,53
97,5,14423,"GORE, Albert Arnold, Jr.",TN,54,4,100,-0.642975046,-0.316,0,0,0,1,41
97,5,14425,"HEFTEL, Cecil Landau",HI,82,1,100,-0.399020787,-0.269,0,0,0,1,44
97,5,14426,"HOLLENBECK, Harold Capistran",NJ,12,9,200,-1.628108027,-0.042,0,0,0,0,55
97,5,14427,"HUCKABY, Thomas Jerald",LA,45,5,100,0.975793552,-0.009,0,0,0,0,55
97,5,14429,"JENKINS, Edgar Lanier (Ed)",GA,44,9,100,1.018151144,-0.116,0,0,0,1,42
97,5,14430,"KILDEE, Dale Edward",MI,23,7,100,-2.723256943,-0.385,0,0,0,0,43
97,5,14432,"LEACH, James Albert Smith",IA,31,1,200,-1.304464078,0.141,0,1,0,0,47
97,5,14435,"MARKEY, Edward John",MA,3,7,100,-3.084847797,-0.5,0,0,0,1,42
97,5,14436,"MARKS, Marc Lincoln",PA,14,24,200,-0.220381346,-0.011,0,0,0,1,49
97,5,14437,"MARLENEE, Ronald Charles",MT,64,2,200,1.247733273,0.393,0,0,0,0,59
97,5,14438,"MARRIOTT, David Daniel",UT,67,2,200,2.031981292,0.264,0,0,0,0,68
97,5,14439,"MATTOX, James Albon",TX,49,5,100,-1.419713558,-0.19,0,0,0,0,52
97,5,14440,"MIKULSKI, Barbara Ann",MD,52,3,100,-2.127411476,-0.37,0,0,1,0,37
97,5,14441,"MURPHY, Austin John",PA,14,22,100,-0.498550779,-0.081,0,0,0,1,42
97,5,14443,"OAKAR, Mary Rose",OH,24,20,100,-1.156372587,-0.4,0,0,1,0,41
97,5,14444,"PANETTA, Leon Edward",CA,71,16,100,-1.248175482,-0.258,0,0,0,1,50
97,5,14445,"PEASE, Donald James",OH,24,13,100,-2.107607257,-0.308,0,0,0,1,52
97,5,14446,"PURSELL, Carl Duane",MI,23,2,200,-1.729750435,0.12,0,0,0,1,48
97,5,14448,"RAHALL, Nick Joe, II",WV,56,4,100,-1.528404389,-0.306,0,0,0,0,40
97,5,14449,"RUDD, Eldon Dean",AZ,61,4,200,3.113633265,0.422,0,0,0,1,65
97,5,14450,"SAWYER, Harold Samuel",MI,23,5,200,0.844015744,0.167,0,0,0,1,55
97,5,14451,"SKELTON, Isaac Newton, IV (Ike)",MO,34,4,100,1.184975085,-0.172,1,0,0,0,52
97,5,14456,"TRIBLE, Paul Seward, Jr.",VA,40,1,200,2.310140777,0.263,1,0,0,0,50
97,5,14458,"VENTO, Bruce Frank",MN,33,4,100,-2.557742873,-0.472,0,0,0,0,34
97,5,14459,"VOLKMER, Harold Lee",MO,34,9,100,-0.072938354,-0.196,0,0,0,1,55
97,5,14460,"WALGREN, Douglas",PA,14,18,100,-2.084925308,-0.247,0,0,0,0,50
97,5,14461,"WALKER, Robert Smith",PA,14,16,200,1.045036022,0.581,0,0,0,1,66
97,5,14462,"WATKINS, Wesley Wade",OK,53,3,100,0.779872362,-0.126,0,0,0,1,49
97,5,14463,"WEISS, Theodore S.",NY,13,20,100,-4.102322133,-0.564,0,0,0,1,25
97,5,14464,"WHITLEY, Charles Orville",NC,47,3,100,1.092043867,-0.175,0,0,0,1,47
97,5,14465,"YOUNG, Robert Anton, III",MO,34,2,100,-0.134463326,-0.3,0,0,0,1,55
97,5,14466,"STANGELAND, Arlan Ingehart",MN,33,7,200,1.029032263,0.346,0,0,0,0,51
97,5,14467,"FOWLER, Wyche, Jr.",GA,44,5,100,-0.56100879,-0.237,0,0,0,1,35
97,5,14469,"LIVINGSTON, Robert Linlithgow, Jr.",LA,45,1,200,1.625400224,0.326,0,0,0,1,51
97,5,14470,"GARCIA, Robert",NY,13,21,100,-3.981123153,-0.559,0,0,0,1,8
97,5,14471,"GREEN, Sedgwick William (Bill)",NY,13,18,200,-1.379837699,-0.044,0,0,0,1,37
97,5,14600,"ALBOSTA, Donald Joseph",MI,23,10,100,-0.625805906,-0.258,0,0,0,1,55
97,5,14601,"ANTHONY, Beryl Franklin, Jr.",AR,42,4,100,0.300335,-0.254,0,0,0,0,41
97,5,14603,"BAILEY, Donald Allen",PA,14,21,100,0.800416326,-0.347,1,0,0,1,46
97,5,14604,"BARNES, Michael Darr",MD,52,8,100,-1.441936331,-0.343,0,1,0,0,47
97,5,14605,"BEREUTER, Douglas Kent",NE,35,1,200,0.64974825,0.231,0,0,0,1,63
97,5,14606,"BETHUNE, Edwin Ruthvin, Jr.",AR,42,2,200,0.890100004,0.304,0,0,0,1,46
97,5,14607,"BONER, William Hill",TN,54,5,100,0.232862425,-0.228,0,0,0,0,39
97,5,14608,"BYRON, Beverly Barton Butcher",MD,52,6,100,0.8419873,-0.024,1,0,1,0,55
97,5,14609,"CAMPBELL, Carroll Ashmore, Jr.",SC,48,4,200,2.394983477,0.306,0,0,0,0,54
97,5,14610,"CARNEY, William",NY,13,1,200,1.970440571,0.326,0,0,0,1,57
97,5,14611,"CHENEY, Richard Bruce",WY,68,1,200,2.270559584,0.523,0,0,0,0,63
97,5,14612,"CLINGER, William Floyd, Jr.",PA,14,23,200,0.207975687,0.176,0,0,0,1,54
97,5,14613,"COELHO, Tony",CA,71,15,100,-0.680632353,-0.413,0,0,0,0,48
97,5,14614,"COURTER, James Andrew",NJ,12,13,200,1.213402951,0.269,1,0,0,0,60
97,5,14615,"CRANE, Daniel Bever",IL,21,22,200,2.779778005,0.744,0,0,0,1,60
97,5,14616,"DANNEMEYER, William Edwin",CA,71,39,200,2.425091002,0.691,0,0,0,1,70
97,5,14617,"DASCHLE, Thomas Andrew",SD,37,1,100,-0.89341606,-0.303,0,0,0,1,56
97,5,14618,"DAVIS, Robert William",MI,23,11,200,0.713304719,0.098,1,0,0,0,50
97,5,14619,"DECKARD, Huey Joel",IN,22,8,200,0.038971243,0.222,0,0,0,1,53
97,5,14620,"DIXON, Julian Carey",CA,71,28,100,-2.069425916,-0.458,0,0,0,1,24
97,5,14621,"DONNELLY, Brian Joseph",MA,3,11,100,-2.024464578,-0.291,0,0,0,0,44
97,5,14622,"DOUGHERTY, Charles Francis",PA,14,4,200,1.170139429,-0.018,1,0,0,1,50
97,5,14623,"ERDAHL, Arlen Ingolf",MN,33,1,200,-1.230594842,0.21,0,1,0,1,47
97,5,14624,"FAZIO, Victor Herbert, Jr.",CA,71,4,100,-0.677980943,-0.455,0,0,0,0,48
97,5,14625,"FERRARO, Geraldine Anne",NY,13,9,100,-1.513123346,-0.384,0,0,1,0,55
97,5,14626,"FROST, Jonas Martin",TX,49,24,100,-0.217911444,-0.316,0,0,0,1,50
97,5,14627,"GINGRICH, Newton Leroy",GA,44,6,200,1.212144562,0.377,0,0,0,0,40
97,5,14629,"GRAY, William Herbert, III",PA,14,2,100,-4.270499307,-0.511,0,0,0,0,13
97,5,14630,"GRISHAM, Wayne Richard",CA,71,33,200,2.173929834,0.395,0,0,0,1,63
97,5,14631,"GUARINI, Frank Joseph, Jr.",NJ,12,14,100,-1.238387705,-0.295,0,0,0,1,43
97,5,14632,"HALL, Tony Patrick",OH,24,3,100,-0.928087755,-0.28,0,0,0,0,45
97,5,14633,"HANCE, Kent Ronald",TX,49,19,100,1.254079101,-0.042,0,0,0,0,70
97,5,14635,"HOPKINS, Larry Jones",KY,51,6,200,0.888603975,0.347,1,0,0,1,46
97,5,14636,"HUTTO, Earl Dewitt",FL,43,1,100,1.629809784,-0.007,1,0,0,1,54
97,5,14637,"JEFFRIES, James Edmund",KS,32,2,200,3.426020773,0.598,0,0,0,1,57
97,5,14638,"KOGOVSEK, Raymond Peter",CO,62,3,100,-1.316036152,-0.33,0,0,0,0,55
97,5,14639,"KRAMER, Kenneth Bentley",CO,62,5,200,2.180915958,0.43,1,0,0,1,62
97,5,14641,"LEATH, James Marvin",TX,49,11,100,1.855759109,0.049,1,0,0,1,53
97,5,14642,"LEE, Gary Alcide",NY,13,33,200,0.992800471,0.346,0,0,0,1,52
97,5,14643,"LELAND, George Thomas (Mickey)",TX,49,18,100,-3.846876386,-0.596,0,0,0,0,25
97,5,14644,"LEWIS, Charles Jeremy (Jerry)",CA,71,37,200,1.500360001,0.348,0,0,0,0,63
97,5,14645,"LOEFFLER, Thomas Gilbert",TX,49,21,200,2.673175169,0.425,0,0,0,0,64
97,5,14646,"LOWRY, Michael Edward",WA,73,7,100,-3.093797722,-0.401,0,0,0,0,44
97,5,14647,"LUNGREN, Daniel Edward",CA,71,34,200,2.297600477,0.497,0,0,0,0,61
97,5,14648,"MICA, Daniel Andrew",FL,43,11,100,0.085281049,-0.184,0,1,0,0,57
97,5,14649,"MATSUI, Robert T.",CA,71,3,100,-0.674446776,-0.404,0,0,0,0,48
97,5,14650,"MAVROULES, Nicholas James",MA,3,6,100,-1.182343251,-0.342,1,0,0,0,44
97,5,14651,"NELSON, Clarence William (Bill)",FL,43,9,100,0.941827476,-0.192,0,0,0,1,62
97,5,14652,"PASHAYAN, Charles, Jr.",CA,71,17,200,1.723375919,0.282,0,0,0,1,56
97,5,14653,"RATCHFORD, William Richard",CT,1,5,100,-1.775839525,-0.355,0,0,0,0,54
97,5,14654,"RITTER, Donald Lawrence",PA,14,15,200,0.747006268,0.268,0,0,0,0,50
97,5,14655,"ROTH, Toby A.",WI,25,8,200,1.050513552,0.351,0,1,0,1,56
97,5,14656,"SABO, Martin Olav",MN,33,5,100,-3.727014567,-0.516,0,0,0,0,29
97,5,14657,"SENSENBRENNER, Frank James, Jr.",WI,25,9,200,0.371705327,0.646,0,0,0,0,58
97,5,14658,"SHANNON, James Michael",MA,3,5,100,-2.236934155,-0.465,0,0,0,0,44
97,5,14659,"SHELBY, Richard C.",AL,41,7,100,1.92872812,0.013,0,0,0,0,45
97,5,14660,"SHUMWAY, Norman David",CA,71,14,200,3.87896232,0.556,0,0,0,0,56
97,5,14661,"SNOWE, Olympia Jean",ME,2,2,200,-0.191066742,0.091,0,1,1,0,46
97,5,14662,"SOLOMON, Gerald Brooks Hunt",NY,13,29,200,3.30410636,0.492,0,0,0,1,55
97,5,14664,"STENHOLM, Charles Walter",TX,49,17,100,2.078708905,0.019,0,0,0,0,54
97,5,14666,"SWIFT, Allan Byron",WA,73,2,100,-1.333790104,-0.43,0,0,0,0,50
97,5,14667,"SYNAR, Michael Lynn",OK,53,2,100,-1.019040446,-0.321,0,0,0,0,55
97,5,14668,"TAUKE, Thomas Joseph",IA,31,2,200,-1.164248965,0.27,0,0,0,0,49
97,5,14669,"THOMAS, William Marshall",CA,71,18,200,1.828439073,0.371,0,0,0,0,63
97,5,14670,"WHITTAKER, Robert Russell",KS,32,5,200,0.52378693,0.346,0,0,0,0,59
97,5,14671,"WILLIAMS, Lyle",OH,24,19,200,0.41981148,0.037,0,0,0,1,41
97,5,14672,"WILLIAMS, John Patrick",MT,64,1,100,-1.900810915,-0.315,0,0,0,1,55
97,5,14673,"WOLPE, Howard Eliot, III",MI,23,3,100,-3.173632137,-0.374,0,1,0,0,53
97,5,14675,"PETRI, Thomas Evert",WI,25,6,200,-0.212704196,0.379,0,0,0,0,53
97,5,14677,"PORTER, John Edward",IL,21,10,200,-0.271900472,0.217,0,0,0,1,52
97,5,14679,"TAUZIN, Wilbert Joseph (Billy)",LA,45,3,100,1.070289398,0.03,0,0,0,0,60
97,5,14681,"CROCKETT, George William, Jr.",MI,23,13,100,-3.505475368,-0.651,0,1,0,0,6
97,5,14800,"BAILEY, R. Wendell",MO,34,8,200,1.206175372,0.47,0,0,0,0,57
97,5,14801,"BENEDICT, Cleveland Keith",WV,56,2,200,0.677842291,0.265,0,0,0,0,47
97,5,14802,"BLILEY, Thomas Jerome, Jr.",VA,40,3,200,2.09649516,0.382,0,0,0,1,55
97,5,14803,"BROWN, George Hanks (Hank)",CO,62,4,200,0.062941644,0.511,0,0,0,1,58
97,5,14804,"CARMAN, Gregory Wright",NY,13,3,200,1.236486814,0.337,0,0,0,1,57
97,5,14805,"CHAPPIE, Eugene A.",CA,71,1,200,1.735837377,0.414,0,0,0,1,57
97,5,14806,"COATS, Daniel Ray",IN,22,4,200,0.461427283,0.375,0,0,0,1,58
97,5,14807,"COYNE, James Kitchenman, III",PA,14,8,200,0.078922377,0.223,0,0,0,0,56
97,5,14808,"COYNE, William Joseph",PA,14,14,100,-1.677631606,-0.494,0,0,0,1,34
97,5,14809,"CRAIG, Larry Edwin",ID,63,1,200,1.778904208,0.494,0,0,0,0,62
97,5,14810,"DAUB, Harold John, Jr., (Hal)",NE,35,2,200,0.554047481,0.391,0,0,0,1,61
97,5,14811,"DeNARDIS, Lawrence Joseph",CT,1,3,200,-1.477957158,0.001,0,0,0,1,50
97,5,14812,"DORGAN, Byron Leslie",ND,36,1,100,-1.450889566,-0.267,0,0,0,0,64
97,5,14813,"DREIER, David Timothy",CA,71,35,200,2.798988677,0.478,0,0,0,0,62
97,5,14814,"DUNN, James Whitney",MI,23,6,200,-0.067665989,0.18,0,0,0,0,50
97,5,14815,"DWYER, Bernard James",NJ,12,15,100,-1.477362165,-0.373,0,0,0,1,49
97,5,14816,"DYMALLY, Mervyn Malcolm",CA,71,31,100,-2.457417253,-0.685,0,1,0,0,35
97,5,14817,"DYSON, Royden Patrick",MD,52,1,100,0.823256433,-0.104,1,0,0,0,52
97,5,14818,"ECKART, Dennis Edward",OH,24,22,100,-1.522990975,-0.242,0,1,0,0,48
97,5,14819,"EMERSON, Norvell William (Bill)",MO,34,10,200,1.5589425,0.332,0,0,0,1,53
97,5,14820,"EVANS, Thomas Cooper",IA,31,3,200,-0.353392002,0.247,0,0,0,1,53
97,5,14821,"FIEDLER, Bobbi",CA,71,21,200,1.263903971,0.343,0,0,1,0,51
97,5,14822,"FIELDS, Jack Milton, Jr.",TX,49,8,200,2.676507737,0.541,0,0,0,0,45
97,5,14823,"FOGLIETTA, Thomas Michael",PA,14,1,328,-1.514943859,-0.506,1,0,0,0,33
97,5,14824,"FRANK, Barney",MA,3,4,100,-2.71330905,-0.499,0,0,0,0,40
97,5,14825,"GEJDENSON, Samuel",CT,1,2,100,-2.006751368,-0.416,0,1,0,0,46
97,5,14826,"GREGG, Judd Alan",NH,4,2,200,0.002440463,0.429,0,0,0,0,56
97,5,14827,"GUNDERSON, Steven Craig",WI,25,3,200,-0.257844518,0.203,0,0,0,0,48
97,5,14828,"HALL, Ralph Moody",TX,49,4,100,1.49556193,0.096,0,0,0,1,58
97,5,14829,"HANSEN, James Vear",UT,67,1,200,3.35020033,0.496,0,0,0,1,77
97,5,14830,"HARTNETT, Thomas Forbes",SC,48,1,200,2.155151606,0.503,1,0,0,1,53
97,5,14831,"HATCHER, Charles Floyd",GA,44,2,100,0.796485369,-0.202,0,0,0,1,42
97,5,14832,"HENDON, William Martin",NC,47,11,200,3.007034843,0.335,0,0,0,0,51
97,5,14833,"HERTEL, Dennis Mark",MI,23,14,100,-1.498529164,-0.345,1,0,0,0,49
97,5,14834,"HILER, John Patrick",IN,22,3,200,1.153574248,0.413,0,0,0,0,54
97,5,14835,"HUNTER, Duncan Lee",CA,71,42,200,2.107243791,0.47,1,0,0,1,53
97,5,14836,"JOHNSTON, Walter Eugene, III",NC,47,6,200,3.065689514,0.723,0,0,0,1,52
97,5,14837,"LANTOS, Thomas Peter",CA,71,11,100,-1.033698717,-0.376,0,1,0,0,49
97,5,14838,"LeBOUTILLIER, John",NY,13,6,200,1.516333,0.362,0,1,0,0,54
97,5,14839,"LOWERY, William David",CA,71,41,200,1.340499315,0.33,0,0,0,0,57
97,5,14840,"MARTIN, David O'Brien",NY,13,30,200,1.648162414,0.232,0,0,0,1,48
97,5,14841,"MARTIN, Lynn Morley",IL,21,16,200,0.044261632,0.345,0,0,1,0,64
97,5,14842,"McCOLLUM, Ira William, Jr. (Bill)",FL,43,5,200,1.64935412,0.377,0,0,0,1,59
97,5,14843,"McCURDY, David Keith",OK,53,4,100,0.677880041,-0.112,1,0,0,0,53
97,5,14844,"McEWEN, Bob",OH,24,6,200,0.993259565,0.359,0,0,0,0,55
97,5,14845,"McGRATH, Raymond Joseph",NY,13,5,200,0.397926858,0.185,0,0,0,0,53
97,5,14846,"MOLINARI, Guy Victor",NY,13,17,200,0.66657237,0.255,0,0,0,1,49
97,5,14847,"MORRISON, Sidney Wallace",WA,73,4,200,1.153582519,0.153,0,0,0,1,55
97,5,14848,"NAPIER, John Light",SC,48,6,200,2.02525356,0.177,0,0,0,1,45
97,5,14849,"NELLIGAN, James Leo",PA,14,11,200,1.479166045,0.13,1,0,0,1,51
97,5,14850,"PATMAN, William Neff",TX,49,14,100,0.982072456,-0.03,0,0,0,1,51
97,5,14851,"ROBERTS, Clint Ronald",SD,37,2,200,1.249348852,0.416,0,0,0,0,65
97,5,14852,"ROBERTS, Charles Patrick (Pat)",KS,32,1,200,0.815137077,0.415,0,0,0,1,66
97,5,14853,"ROEMER, Charles Elson (Buddy), III",LA,45,4,100,0.970830715,0.178,0,0,0,0,54
97,5,14854,"ROGERS, Harold Dallas (Hal)",KY,51,5,200,1.917313972,0.331,0,0,0,1,60
97,5,14855,"ROUKEMA, Margaret Scafati",NJ,12,7,200,-0.477662755,0.162,0,0,1,0,57
97,5,14856,"SAVAGE, Gus",IL,21,2,100,-3.804330739,-0.671,0,0,0,1,12
97,5,14857,"SCHNEIDER, Claudine",RI,5,2,200,-1.357508042,-0.026,0,0,1,0,38
97,5,14858,"SCHUMER, Charles Ellis (Chuck)",NY,13,16,100,-2.538004063,-0.35,0,0,0,0,49
97,5,14859,"SHAMANSKY, Robert Norton",OH,24,12,100,-0.506830489,-0.279,0,1,0,1,55
97,5,14860,"SHAW, Eugene Clay, Jr.",FL,43,12,200,1.484894187,0.3,0,0,0,0,56
97,5,14861,"SKEEN, Joseph Richard",NM,66,2,200,2.124106126,0.301,0,0,0,1,60
97,5,14862,"SMITH, Albert Lee, Jr.",AL,41,6,200,3.278780352,0.461,0,0,0,1,53
97,5,14863,"SMITH, Christopher Henry",NJ,12,4,200,-0.433697436,0.158,0,0,0,0,47
97,5,14864,"SMITH, Dennis Alan (Denny)",OR,72,2,200,2.566272579,0.603,0,0,0,1,54
97,5,14865,"STATON, David Michael",WV,56,3,200,2.147026294,0.33,0,0,0,1,47
97,5,14866,"WASHINGTON, Harold",IL,21,1,100,-3.828609463,-0.488,0,0,0,1,5
97,5,14867,"WEBER, Edward Ford",OH,24,9,200,0.780602762,0.258,0,0,0,0,44
97,5,14868,"WEBER, John Vincent (Vin)",MN,33,6,200,-0.163732223,0.381,0,0,0,0,49
97,5,14869,"WOLF, Frank Rudolph",VA,40,10,200,1.241881317,0.284,0,0,0,1,54
97,5,14870,"WORTLEY, George Cornelius",NY,13,32,200,0.840656179,0.207,0,0,0,1,51
97,5,14871,"WYDEN, Ronald Lee",OR,72,3,100,-2.839947983,-0.314,0,0,0,0,40
97,5,14873,"HOYER, Steny Hamilton",MD,52,5,100,-0.937319402,-0.379,0,0,0,0,40
97,5,14873,"HOYER, Steny Hamilton",MD,52,5,100,-0.937319402,-0.379,0,0,0,0,40
97,5,14879,"MART̍NEZ, Matthew G.",CA,71,30,100,-1.323952575,-0.341,0,0,0,1,44
97,5,14879,"MART̍NEZ, Matthew G.",CA,71,30,100,-1.323952575,-0.341,0,0,0,1,44
97,5,14880,"HALL, Katie Beatrice",IN,22,1,100,-2.159155928,-0.529,0,0,1,0,41
97,5,14880,"HALL, Katie Beatrice",IN,22,1,100,-2.159155928,-0.529,0,0,1,0,41
97,5,94428,"IRELAND, Andrew Poysell (Andy)",FL,43,8,100,1.086233418,0.015,0,0,0,0,60
97,5,94454,"STUMP, Robert Lee",AZ,61,3,100,4.301461036,0.329,1,0,0,1,65
97,5,94602,"ATKINSON, Eugene Vincent",PA,14,25,200,0.127168919,0.069,0,0,0,1,45
97,5,94628,"GRAMM, William Philip (Phil)",TX,49,6,100,3.129051304,0.215,0,0,0,0,54
98,6,633,"BENNETT, Charles Edward",FL,43,3,100,0.009824557,-0.088,1,0,0,1,48
98,6,830,"BOLAND, Edward Patrick",MA,3,2,100,-1.596521362,-0.306,0,0,0,1,42
98,6,1077,"BROOKS, Jack Bascom",TX,49,9,100,-0.806470219,-0.407,0,0,0,1,NA
98,6,1087,"BROOMFIELD, William S.",MI,23,18,200,1.167193902,0.227,0,1,0,0,NA
98,6,2009,"CONTE, Silvio Ottavio",MA,3,1,200,-1.016014861,-0.023,0,0,0,1,40
98,6,2605,"DINGELL, John David, Jr.",MI,23,16,100,-1.504214387,-0.448,0,0,0,1,NA
98,6,3078,"FASCELL, Dante Bruno",FL,43,19,100,-0.648842306,-0.4,0,1,0,1,59
98,6,5101,"KASTENMEIER, Robert William",WI,25,2,100,-2.871776379,-0.514,0,0,0,1,41
98,6,5495,"LATTA, Delbert Leroy",OH,24,5,200,2.249765071,0.391,0,0,0,0,60
98,6,6455,"MICHEL, Robert Henry",IL,21,18,200,1.555484117,0.372,0,0,0,1,62
98,6,6845,"NATCHER, William Huston",KY,51,2,100,-0.711954758,-0.288,0,0,0,1,51
98,6,7081,"O'NEILL, Thomas Philip, Jr. (Tip)",MA,3,8,100,-2.622507629,-0.402,0,0,0,0,32
98,6,7333,"PEPPER, Claude Denson",FL,43,18,100,-0.968610617,-0.422,0,0,0,0,56
98,6,7343,"PERKINS, Carl Dewey",KY,51,7,100,-0.895263793,-0.343,0,0,0,1,44
98,6,7610,"PRICE, Charles Melvin",IL,21,21,100,-0.264482553,-0.429,1,0,0,1,51
98,6,8010,"RODINO, Peter Wallace, Jr.",NJ,12,10,100,-3.862443232,-0.435,0,0,0,1,27
98,6,8080,"ROSTENKOWSKI, Daniel David",IL,21,8,100,-1.190976298,-0.39,0,0,0,1,NA
98,6,8672,"SMITH, Neal Edward",IA,31,4,100,-1.245701538,-0.313,0,0,0,1,46
98,6,9017,"STRATTON, Samuel Studdiford",NY,13,23,100,0.67372367,-0.139,1,0,0,1,40
98,6,10075,"WHITTEN, Jamie Lloyd",MS,46,1,100,-0.41805279,-0.161,0,0,0,0,43
98,6,10391,"WRIGHT, James Claude, Jr.",TX,49,12,100,-0.553832506,-0.383,0,0,0,1,NA
98,6,10421,"YATES, Sidney Richard",IL,21,9,100,-3.90716105,-0.494,0,0,0,1,39
98,6,10463,"ZABLOCKI, Clement John",WI,25,4,100,-0.846916295,-0.355,0,1,0,0,NA
98,6,10463,"ZABLOCKI, Clement John",WI,25,4,100,-0.846916295,-0.355,0,1,0,0,NA
98,6,10500,"ADDABBO, Joseph Patrick",NY,13,6,100,-3.040169101,-0.402,0,0,0,0,NA
98,6,10520,"GONŹLEZ, Henry B.",TX,49,20,100,-1.483630316,-0.538,0,0,0,0,NA
98,6,10561,"ST. GERMAIN, Fernand Joseph",RI,5,1,100,-1.901289977,-0.355,0,0,0,1,37
98,6,10566,"UDALL, Morris King",AZ,61,2,100,-1.921465524,-0.387,0,0,0,1,48
98,6,10573,"BROWN, George Edward, Jr.",CA,71,36,100,-2.854680678,-0.506,0,0,0,1,51
98,6,10574,"BROYHILL, James Thomas",NC,47,10,200,1.431566361,0.269,0,0,0,0,55
98,6,10577,"BURTON, Phillip",CA,71,5,100,-4.058645079,-0.634,0,0,0,1,33
98,6,10577,"BURTON, Phillip",CA,71,5,100,-4.058645079,-0.634,0,0,0,1,33
98,6,10583,"EDWARDS, William Donlon (Don)",CA,71,10,100,-2.783071053,-0.599,0,0,0,1,45
98,6,10587,"FUQUA, Don",FL,43,2,100,0.04146971,-0.173,0,0,0,1,44
98,6,10588,"GIBBONS, Sam Melville",FL,43,7,100,-1.055137745,-0.233,0,0,0,1,53
98,6,10595,"HAWKINS, Augustus Freeman (Gus)",CA,71,29,100,-2.472905972,-0.517,0,0,0,0,27
98,6,10596,"HORTON, Frank Jefferson",NY,13,29,200,-0.187194821,-0.004,0,0,0,1,NA
98,6,10601,"LONG, Clarence Dickinson",MD,52,2,100,-1.16604149,-0.274,0,0,0,1,50
98,6,10602,"LONG, Gillis William",LA,45,8,100,-0.991379779,-0.368,0,0,0,1,42
98,6,10607,"McDADE, Joseph Michael",PA,14,10,200,0.284350748,0.093,0,0,0,0,54
98,6,10609,"MINISH, Joseph George",NJ,12,11,100,-1.039625391,-0.299,0,0,0,1,54
98,6,10614,"PICKLE, James Jarrell (Jake)",TX,49,10,100,-0.224591696,-0.218,0,0,0,1,NA
98,6,10616,"QUILLEN, James Henry",TN,54,1,200,1.600948612,0.246,0,0,0,1,61
98,6,10621,"ROYBAL, Edward R.",CA,71,25,100,-4.347860762,-0.61,0,0,0,1,34
98,6,10626,"SNYDER, Marion Gene",KY,51,4,200,1.425254396,0.26,0,0,0,0,59
98,6,10703,"ANNUNZIO, Frank",IL,21,11,100,-0.850825777,-0.398,0,0,0,0,NA
98,6,10712,"CONABLE, Barber Benjamin, Jr.",NY,13,30,200,1.061916867,0.371,0,0,0,1,NA
98,6,10713,"CONYERS, John, Jr.",MI,23,1,100,-3.532978371,-0.658,0,0,0,1,NA
98,6,10716,"de la GARZA, Eligio, II (Kika)",TX,49,15,100,-0.32918431,-0.255,0,0,0,1,43
98,6,10717,"DICKINSON, William Louis",AL,41,2,200,2.180240165,0.398,1,0,0,1,54
98,6,10719,"DUNCAN, John James",TN,54,2,200,1.720307384,0.194,0,0,0,1,58
98,6,10721,"EDWARDS, William Jackson (Jack)",AL,41,1,200,0.988499969,0.177,0,0,0,1,57
98,6,10722,"ERLENBORN, John Neal",IL,21,13,200,1.676179536,0.315,0,0,0,1,NA
98,6,10726,"FOLEY, Thomas Stephen",WA,73,5,100,-1.10682983,-0.354,0,0,0,0,56
98,6,10727,"FORD, William David",MI,23,15,100,-3.000196666,-0.516,0,0,0,1,NA
98,6,10732,"HAMILTON, Lee Herbert",IN,22,9,100,-0.976331103,-0.171,0,1,0,0,53
98,6,10734,"HANSEN, George Vernon",ID,63,2,200,5.053053441,0.621,0,0,0,1,73
98,6,10739,"HOWARD, James John",NJ,12,3,100,-2.192905798,-0.431,0,0,0,1,57
98,6,10742,"JACOBS, Andrew, Jr.",IN,22,10,100,-1.118027492,-0.07,0,0,0,1,50
98,6,10760,"OTTINGER, Richard Lawrence",NY,13,20,100,-4.316611422,-0.391,0,0,0,0,52
98,6,10768,"SCHEUER, James Haas",NY,13,8,100,-2.361459956,-0.478,0,0,0,1,NA
98,6,10788,"JONES, Walter Beaman, Sr.",NC,47,1,100,-0.526335495,-0.259,0,0,0,0,45
98,6,10794,"VANDER JAGT, Guy Adrian",MI,23,9,200,1.204733268,0.247,0,0,0,0,NA
98,6,11000,"BEVILL, Tom",AL,41,4,100,0.448197448,-0.213,0,0,0,1,47
98,6,11020,"HAMMERSCHMIDT, John Paul",AR,42,3,200,1.635509677,0.253,0,0,0,1,60
98,6,11023,"KAZEN, Abraham, Jr.",TX,49,23,100,0.524274728,-0.219,1,0,0,1,56
98,6,11034,"MILLER, Clarence E.",OH,24,10,200,1.191631295,0.416,0,0,0,0,56
98,6,11035,"MONTGOMERY, Gillespie V. (Sonny)",MS,46,3,100,1.390670928,0.017,1,0,0,1,55
98,6,11036,"MYERS, John Thomas",IN,22,7,200,1.36771648,0.236,0,0,0,1,60
98,6,11037,"NICHOLS, William Flynt",AL,41,3,100,1.012590823,-0.042,1,0,0,1,47
98,6,11057,"WINN, Edward Lawrence, Jr. (Larry)",KS,32,3,200,2.017636987,0.247,0,1,0,0,56
98,6,11058,"WYLIE, Chalmers Pangburn",OH,24,15,200,0.900032532,0.23,0,0,0,1,57
98,6,11067,"GAYDOS, Joseph Matthew",PA,14,20,100,-0.472567798,-0.278,0,0,0,1,40
98,6,12000,"ALEXANDER, William Vollie (Bill), Jr.",AR,42,1,100,-0.806585525,-0.41,0,0,0,1,45
98,6,12001,"ANDERSON, Glenn Malcolm",CA,71,32,100,-0.83130259,-0.269,0,0,0,1,52
98,6,12003,"BIAGGI, Mario",NY,13,19,100,-1.229260085,-0.339,0,0,0,0,NA
98,6,12007,"CHAPPELL, William Venroe, Jr.",FL,43,4,100,0.637695908,-0.098,0,0,0,1,59
98,6,12009,"CLAY, William Lacy, Sr.",MO,34,1,100,-4.461029811,-0.49,0,0,0,1,NA
98,6,12010,"COUGHLIN, Robert Lawrence",PA,14,13,200,-0.08691912,0.204,0,0,0,1,55
98,6,12011,"DANIEL, Wilbur Clarence (Dan)",VA,40,5,100,1.877614865,0.161,1,0,0,1,56
98,6,12013,"FISH, Hamilton, Jr.",NY,13,21,200,-0.035063089,0.07,0,0,0,1,60
98,6,12022,"LUJ́N, Manuel, Jr.",NM,66,1,200,1.427724674,0.272,0,0,0,0,54
98,6,12030,"STOKES, Louis",OH,24,21,100,-5.399769314,-0.578,0,0,0,1,NA
98,6,12033,"WHITEHURST, George William",VA,40,2,200,1.888403955,0.233,1,0,0,1,53
98,6,12035,"YATRON, Gus",PA,14,6,100,-0.878930359,-0.174,0,1,0,0,57
98,6,12036,"OBEY, David Ross",WI,25,7,100,-2.380335273,-0.45,0,0,0,0,46
98,6,12038,"JONES, Ed",TN,54,8,100,-0.2170072,-0.245,0,0,0,0,47
98,6,12041,"CRANE, Philip Miller",IL,21,12,200,3.555840304,0.739,0,0,0,1,NA
98,6,12042,"ROE, Robert A.",NJ,12,8,100,-0.948081454,-0.326,0,0,0,1,54
98,6,12046,"FORSYTHE, Edwin Bell",NJ,12,13,200,-0.092412016,0.326,0,0,0,0,62
98,6,13002,"ARCHER, William Reynolds, Jr.",TX,49,7,200,2.68489987,0.496,0,0,0,1,NA
98,6,13003,"ASPIN, Leslie",WI,25,1,100,-1.093345253,-0.32,1,0,0,1,51
98,6,13011,"DELLUMS, Ronald V.",CA,71,8,100,-3.337887827,-0.644,1,0,0,1,33
98,6,13015,"FRENZEL, William Eldridge",MN,33,3,200,0.558749442,0.353,0,0,0,1,48
98,6,13018,"HILLIS, Elwood Haynes",IN,22,5,200,1.188913158,0.173,1,0,0,1,64
98,6,13020,"KEMP, Jack French",NY,13,31,200,1.551679041,0.3,0,0,0,1,51
98,6,13021,"LENT, Norman Frederick",NY,13,4,200,1.207167922,0.183,0,0,0,1,NA
98,6,13024,"MAZZOLI, Romano Louis",KY,51,3,100,-0.764861099,-0.186,0,0,0,1,46
98,6,13029,"McKINNEY, Stewart Brett",CT,1,4,200,-1.251548499,-0.006,0,0,0,1,54
98,6,13031,"MITCHELL, Parren James",MD,52,7,100,-3.600538949,-0.526,0,0,0,1,14
98,6,13035,"RANGEL, Charles B.",NY,13,16,100,-4.379971728,-0.514,0,0,0,1,NA
98,6,13036,"ROBINSON, James Kenneth",VA,40,7,200,2.268481729,0.333,0,0,0,1,59
98,6,13040,"SEIBERLING, John Frederick",OH,24,14,100,-2.842456472,-0.496,0,0,0,1,44
98,6,13042,"SPENCE, Floyd Davidson",SC,48,2,200,2.379422349,0.32,1,0,0,1,53
98,6,13047,"YOUNG, Charles William (Bill)",FL,43,8,200,1.385370037,0.325,0,0,0,1,54
98,6,13056,"BREAUX, John Berlinger",LA,45,7,100,0.823375094,-0.123,0,0,0,0,50
98,6,14001,"ANDREWS, Ike Franklin",NC,47,4,100,-0.621721314,-0.178,0,0,0,1,47
98,6,14015,"GILMAN, Benjamin Arthur",NY,13,22,200,0.561413335,0.043,0,1,0,1,56
98,6,14021,"HOLT, Marjorie Sewell",MD,52,4,200,2.091228942,0.368,1,0,1,0,50
98,6,14026,"JONES, James Robert",OK,53,1,100,-0.334169342,-0.095,0,0,0,1,NA
98,6,14029,"LEHMAN, William",FL,43,17,100,-2.969106013,-0.483,0,0,0,0,56
98,6,14031,"LOTT, Chester Trent",MS,46,5,200,2.576191812,0.39,0,0,0,0,59
98,6,14033,"MADIGAN, Edward Rell",IL,21,15,200,1.282208734,0.247,0,0,0,0,64
98,6,14035,"MARTIN, James Grubbs",NC,47,9,200,1.266944535,0.347,0,0,0,0,50
98,6,14039,"MOAKLEY, John Joseph",MA,3,9,100,-2.875648676,-0.418,0,0,0,1,43
98,6,14040,"MOORHEAD, Carlos John",CA,71,22,200,2.679501214,0.465,0,0,0,1,68
98,6,14041,"O'BRIEN, George Miller",IL,21,4,200,0.618734331,0.169,0,0,0,1,NA
98,6,14043,"PARRIS, Stanford E.",VA,40,8,200,1.589791099,0.287,0,0,0,1,56
98,6,14044,"PRITCHARD, Joel McFee",WA,73,1,200,0.049385137,0.109,0,1,0,1,NA
98,6,14045,"REGULA, Ralph Straus",OH,24,16,200,0.760677265,0.221,0,0,0,1,57
98,6,14046,"RINALDO, Matthew John",NJ,12,7,200,-0.038041807,0.023,0,0,0,0,51
98,6,14048,"ROSE, Charles Grandison, III",NC,47,7,100,-0.917546217,-0.319,0,0,0,0,45
98,6,14051,"SCHROEDER, Patricia Scott",CO,62,1,100,-2.197734769,-0.225,1,0,1,0,41
98,6,14052,"SHUSTER, E. G. (Bud)",PA,14,9,200,2.173050802,0.416,0,0,0,1,60
98,6,14053,"STARK, Fortney Hillman (Pete), Jr.",CA,71,9,100,-3.910831731,-0.631,0,0,0,1,46
98,6,14055,"STUDDS, Gerry Eastman",MA,3,10,100,-4.206025452,-0.444,0,1,0,0,48
98,6,14057,"TAYLOR, Gene",MO,34,7,200,1.912600854,0.328,0,0,0,0,61
98,6,14062,"WILSON, Charles",TX,49,2,100,0.717021561,-0.196,0,0,0,1,NA
98,6,14066,"YOUNG, Donald Edwin",AK,81,1,200,1.27847865,0.278,0,0,0,1,62
98,6,14067,"BOGGS, Corinne Claiborne (Lindy)",LA,45,2,100,-0.561682025,-0.359,0,0,1,0,42
98,6,14068,"COLLINS, Cardiss",IL,21,7,100,-3.475934402,-0.552,0,0,1,0,NA
98,6,14070,"LUKEN, Thomas Andrew",OH,24,1,100,-1.320847603,-0.163,0,0,0,1,59
98,6,14071,"LAGOMARSINO, Robert John",CA,71,19,200,1.531110184,0.378,0,1,0,1,53
98,6,14072,"MURTHA, John Patrick, Jr.",PA,14,12,100,-0.042135069,-0.265,0,0,0,1,50
98,6,14075,"TRAXLER, Jerome Bob",MI,23,8,100,-1.511604851,-0.33,0,0,0,1,NA
98,6,14201,"AuCOIN, Les",OR,72,1,100,-2.258485485,-0.231,0,0,0,1,49
98,6,14205,"BEDELL, Berkley Warren",IA,31,6,100,-2.225609889,-0.24,0,0,0,1,58
98,6,14208,"BONKER, Don Leroy",WA,73,3,100,-1.912216322,-0.336,0,1,0,1,NA
98,6,14210,"CARR, Milton Robert (Bob)",MI,23,6,100,-1.611066556,-0.254,0,0,0,0,51
98,6,14212,"DERRICK, Butler Carson, Jr.",SC,48,3,100,-0.7724018,-0.215,0,0,0,0,47
98,6,14214,"DOWNEY, Thomas Joseph",NY,13,2,100,-2.80838117,-0.384,0,0,0,0,NA
98,6,14216,"EARLY, Joseph Daniel",MA,3,3,100,-2.368862214,-0.254,0,0,0,1,43
98,6,14217,"EDGAR, Robert William",PA,14,7,100,-3.495367454,-0.334,0,0,0,0,56
98,6,14219,"ENGLISH, Glenn Lee, Jr.",OK,53,6,100,0.006455566,-0.027,0,0,0,0,NA
98,6,14223,"FLORIO, James Joseph",NJ,12,1,100,-1.484086315,-0.318,0,0,0,1,50
98,6,14224,"FORD, Harold Eugene",TN,54,9,100,-2.619843532,-0.438,0,0,0,0,34
98,6,14225,"GRADISON, Willis David, Jr.",OH,24,2,200,0.583185063,0.233,0,0,0,0,58
98,6,14230,"HARKIN, Thomas Richard (Tom)",IA,31,5,100,-2.293860739,-0.351,0,0,0,1,58
98,6,14233,"HEFNER, Willie Gathrel (Bill)",NC,47,8,100,-0.313215655,-0.264,0,0,0,0,52
98,6,14234,"HIGHTOWER, Jack English",TX,49,13,100,0.483746129,-0.115,0,0,0,1,NA
98,6,14237,"HUBBARD, Carroll, Jr.",KY,51,1,100,0.936605698,-0.038,0,0,0,0,44
98,6,14238,"HUGHES, William John",NJ,12,2,100,-0.696219365,-0.153,0,0,0,0,54
98,6,14239,"HYDE, Henry John",IL,21,6,200,1.449935465,0.312,0,1,0,1,NA
98,6,14240,"JEFFORDS, James Merrill",VT,6,1,200,-0.722688876,0.014,0,0,0,1,44
98,6,14245,"KINDNESS, Thomas Norman",OH,24,8,200,1.668258863,0.419,0,0,0,0,60
98,6,14248,"LaFALCE, John Joseph",NY,13,32,100,-1.266280376,-0.357,0,0,0,1,NA
98,6,14249,"LEVITAS, Elliott Harris",GA,44,4,100,0.123867363,-0.056,0,0,0,1,NA
98,6,14251,"LLOYD, Marilyn Laird",TN,54,3,100,1.173795555,-0.058,1,0,1,0,56
98,6,14252,"McDONALD, Lawrence Patton",GA,44,7,100,4.193233494,0.884,1,0,0,1,NA
98,6,14252,"McDONALD, Lawrence Patton",GA,44,7,100,4.193233494,0.884,1,0,0,1,NA
98,6,14253,"McHUGH, Matthew Francis",NY,13,28,100,-1.781349725,-0.353,0,0,0,0,50
98,6,14256,"MILLER, George",CA,71,7,100,-2.45220591,-0.552,0,0,0,0,47
98,6,14257,"MINETA, Norman Y.",CA,71,13,100,-2.81071019,-0.479,0,0,0,1,50
98,6,14259,"MOORE, William Henson, III",LA,45,6,200,1.102887438,0.24,0,0,0,1,53
98,6,14262,"NEAL, Stephen Lybrook",NC,47,5,100,-0.666344817,-0.145,0,0,0,0,54
98,6,14264,"NOWAK, Henry James",NY,13,33,100,-2.409556571,-0.332,0,0,0,1,NA
98,6,14265,"OBERSTAR, James Louis",MN,33,8,100,-3.715638207,-0.553,0,0,0,0,37
98,6,14266,"PATTERSON, Jerry Mumford",CA,71,38,100,-1.507457595,-0.367,0,0,0,1,63
98,6,14271,"RUSSO, Martin Anthony",IL,21,3,100,-1.602845881,-0.192,0,0,0,0,NA
98,6,14273,"SCHULZE, Richard Taylor",PA,14,5,200,1.514807143,0.271,0,0,0,1,58
98,6,14274,"SHARP, Philip Riley",IN,22,2,100,-0.950769215,-0.166,0,0,0,0,61
98,6,14275,"SIMON, Paul Martin",IL,21,22,100,-1.734323388,-0.397,0,0,0,0,54
98,6,14276,"SMITH, Virginia Dodd",NE,35,3,200,0.972469364,0.238,0,0,1,0,74
98,6,14277,"SOLARZ, Stephen Joshua",NY,13,13,100,-2.027326835,-0.429,0,1,0,0,NA
98,6,14280,"WAXMAN, Henry Arnold",CA,71,24,100,-3.161705417,-0.473,0,0,0,0,42
98,6,14281,"WEAVER, James Howard",OR,72,4,100,-1.915369576,-0.311,0,0,0,1,49
98,6,14282,"WIRTH, Timothy E.",CO,62,2,100,-3.039510574,-0.293,0,0,0,0,51
98,6,14284,"D'AMOURS, Norman Edward",NH,4,1,100,-0.991587046,-0.17,0,0,0,0,60
98,6,14288,"GOODLING, William Franklin",PA,14,19,200,-0.084517166,0.336,0,1,0,1,60
98,6,14289,"LUNDINE, Stanley Nelson",NY,13,34,100,-2.476583115,-0.31,0,0,0,0,55
98,6,14290,"PAUL, Ronald Ernest",TX,49,22,200,0.268171574,0.863,0,0,0,1,NA
98,6,14291,"HALL, Sam Blakeley, Jr.",TX,49,1,100,1.093217582,0.054,0,0,0,1,50
98,6,14400,"AKAKA, Daniel Kahikina",HI,82,2,100,-1.097791,-0.419,0,0,0,1,NA
98,6,14402,"APPLEGATE, Douglas Earl",OH,24,18,100,-0.594111128,-0.106,0,0,0,0,50
98,6,14403,"BADHAM, Robert Edward",CA,71,40,200,2.678253299,0.541,1,0,0,1,69
98,6,14404,"BARNARD, Druie Douglas, Jr.",GA,44,10,100,0.766342761,-0.028,0,0,0,1,NA
98,6,14405,"BEILENSON, Anthony Charles",CA,71,23,100,-2.761841544,-0.44,0,0,0,0,49
98,6,14407,"BONIOR, David Edward",MI,23,12,100,-2.761779259,-0.547,0,0,0,1,NA
98,6,14410,"COLEMAN, Earl Thomas",MO,34,6,200,1.055320704,0.262,0,0,0,0,52
98,6,14411,"CORCORAN, Thomas Joseph",IL,21,14,200,2.085334974,0.319,0,0,0,1,NA
98,6,14413,"DICKS, Norman DeValois",WA,73,6,100,-0.981864751,-0.312,0,0,0,0,NA
98,6,14415,"EDWARDS, Marvin Henry (Mickey)",OK,53,5,200,1.652004158,0.394,0,0,0,0,NA
98,6,14419,"FLIPPO, Ronnie Gene",AL,41,5,100,0.493097035,-0.175,0,0,0,0,41
98,6,14421,"GEPHARDT, Richard Andrew",MO,34,3,100,-1.367405415,-0.416,0,0,0,1,NA
98,6,14422,"GLICKMAN, Daniel Robert",KS,32,4,100,-0.641328961,-0.133,0,0,0,0,54
98,6,14423,"GORE, Albert Arnold, Jr.",TN,54,6,100,-0.860673249,-0.316,0,0,0,1,43
98,6,14425,"HEFTEL, Cecil Landau",HI,82,1,100,-0.740775477,-0.269,0,0,0,1,NA
98,6,14427,"HUCKABY, Thomas Jerald",LA,45,5,100,0.610685001,-0.009,0,0,0,0,53
98,6,14429,"JENKINS, Edgar Lanier (Ed)",GA,44,9,100,0.380778828,-0.116,0,0,0,1,NA
98,6,14430,"KILDEE, Dale Edward",MI,23,7,100,-3.215168528,-0.385,0,0,0,0,NA
98,6,14431,"KOSTMAYER, Peter Houston",PA,14,8,100,-2.276259666,-0.298,0,1,0,0,56
98,6,14432,"LEACH, James Albert Smith",IA,31,1,200,-1.091221542,0.141,0,1,0,0,51
98,6,14435,"MARKEY, Edward John",MA,3,7,100,-3.869589925,-0.5,0,0,0,1,42
98,6,14437,"MARLENEE, Ronald Charles",MT,64,2,200,1.877701977,0.393,0,0,0,0,60
98,6,14438,"MARRIOTT, David Daniel",UT,67,2,200,1.823260167,0.264,0,0,0,0,67
98,6,14440,"MIKULSKI, Barbara Ann",MD,52,3,100,-1.971463985,-0.37,0,0,1,0,40
98,6,14441,"MURPHY, Austin John",PA,14,22,100,-0.622199489,-0.081,0,0,0,1,38
98,6,14443,"OAKAR, Mary Rose",OH,24,20,100,-1.920498106,-0.4,0,0,1,0,NA
98,6,14444,"PANETTA, Leon Edward",CA,71,16,100,-1.878901328,-0.258,0,0,0,1,49
98,6,14445,"PEASE, Donald James",OH,24,13,100,-2.055527877,-0.308,0,0,0,1,55
98,6,14446,"PURSELL, Carl Duane",MI,23,2,200,0.122694616,0.12,0,0,0,1,NA
98,6,14448,"RAHALL, Nick Joe, II",WV,56,4,100,-1.407498222,-0.306,0,0,0,0,40
98,6,14449,"RUDD, Eldon Dean",AZ,61,4,200,3.470542919,0.422,0,0,0,1,68
98,6,14450,"SAWYER, Harold Samuel",MI,23,5,200,1.025422509,0.167,0,0,0,1,56
98,6,14451,"SKELTON, Isaac Newton, IV (Ike)",MO,34,4,100,0.488979164,-0.172,1,0,0,0,57
98,6,14454,"STUMP, Robert Lee",AZ,61,3,200,2.597150511,0.703,1,0,0,1,69
98,6,14458,"VENTO, Bruce Frank",MN,33,4,100,-3.259631102,-0.472,0,0,0,0,35
98,6,14459,"VOLKMER, Harold Lee",MO,34,9,100,-0.633602664,-0.196,0,0,0,1,54
98,6,14460,"WALGREN, Douglas",PA,14,18,100,-2.035446876,-0.247,0,0,0,0,56
98,6,14461,"WALKER, Robert Smith",PA,14,16,200,2.077889156,0.581,0,0,0,1,67
98,6,14462,"WATKINS, Wesley Wade",OK,53,3,100,-0.15763711,-0.126,0,0,0,1,52
98,6,14463,"WEISS, Theodore S.",NY,13,17,100,-2.860598933,-0.564,0,1,0,1,NA
98,6,14464,"WHITLEY, Charles Orville",NC,47,3,100,0.173655844,-0.175,0,0,0,1,44
98,6,14465,"YOUNG, Robert Anton, III",MO,34,2,100,-0.826830998,-0.3,0,0,0,1,NA
98,6,14466,"STANGELAND, Arlan Ingehart",MN,33,7,200,1.141556277,0.346,0,0,0,0,51
98,6,14467,"FOWLER, Wyche, Jr.",GA,44,5,100,-0.969909238,-0.237,0,0,0,1,NA
98,6,14469,"LIVINGSTON, Robert Linlithgow, Jr.",LA,45,1,200,2.251405383,0.326,0,0,0,1,55
98,6,14470,"GARCIA, Robert",NY,13,18,100,-3.27886941,-0.559,0,1,0,1,NA
98,6,14470,"GARCIA, Robert",NY,13,18,100,-3.27886941,-0.559,0,1,0,1,NA
98,6,14470,"GARCIA, Robert",NY,13,18,100,-3.27886941,-0.559,0,1,0,1,NA
98,6,14470,"GARCIA, Robert",NY,13,18,100,-3.27886941,-0.559,0,1,0,1,NA
98,6,14471,"GREEN, Sedgwick William (Bill)",NY,13,15,200,-1.007020541,-0.044,0,0,0,1,NA
98,6,14600,"ALBOSTA, Donald Joseph",MI,23,10,100,-1.065145774,-0.258,0,0,0,1,NA
98,6,14601,"ANTHONY, Beryl Franklin, Jr.",AR,42,4,100,-0.563754311,-0.254,0,0,0,0,43
98,6,14604,"BARNES, Michael Darr",MD,52,8,100,-1.783176864,-0.343,0,1,0,0,47
98,6,14605,"BEREUTER, Douglas Kent",NE,35,1,200,0.54837311,0.231,0,1,0,1,63
98,6,14606,"BETHUNE, Edwin Ruthvin, Jr.",AR,42,2,200,1.070918786,0.304,0,0,0,1,46
98,6,14607,"BONER, William Hill",TN,54,5,100,-0.190771213,-0.228,0,0,0,0,37
98,6,14608,"BYRON, Beverly Barton Butcher",MD,52,6,100,0.796093831,-0.024,1,0,1,0,59
98,6,14609,"CAMPBELL, Carroll Ashmore, Jr.",SC,48,4,200,2.103239629,0.306,0,0,0,0,54
98,6,14610,"CARNEY, William",NY,13,1,200,1.662829196,0.326,0,0,0,1,NA
98,6,14611,"CHENEY, Richard Bruce",WY,68,1,200,2.78983905,0.523,0,0,0,0,63
98,6,14612,"CLINGER, William Floyd, Jr.",PA,14,23,200,0.485389191,0.176,0,0,0,1,55
98,6,14613,"COELHO, Tony",CA,71,15,100,-1.527229788,-0.413,0,0,0,0,50
98,6,14614,"COURTER, James Andrew",NJ,12,12,200,1.166400847,0.269,1,0,0,0,62
98,6,14615,"CRANE, Daniel Bever",IL,21,19,200,3.941275502,0.744,1,0,0,1,58
98,6,14616,"DANNEMEYER, William Edwin",CA,71,39,200,3.484517979,0.691,0,0,0,1,69
98,6,14617,"DASCHLE, Thomas Andrew",SD,37,1,100,-0.998828237,-0.303,0,0,0,1,61
98,6,14618,"DAVIS, Robert William",MI,23,11,200,0.482195984,0.098,1,0,0,0,51
98,6,14620,"DIXON, Julian Carey",CA,71,28,100,-3.168214031,-0.458,0,0,0,1,26
98,6,14621,"DONNELLY, Brian Joseph",MA,3,11,100,-1.753733273,-0.291,0,0,0,0,45
98,6,14624,"FAZIO, Victor Herbert, Jr.",CA,71,4,100,-1.388584615,-0.455,0,0,0,0,50
98,6,14625,"FERRARO, Geraldine Anne",NY,13,9,100,-2.369947067,-0.384,0,0,1,0,NA
98,6,14626,"FROST, Jonas Martin",TX,49,24,100,-0.710360956,-0.316,0,0,0,1,48
98,6,14627,"GINGRICH, Newton Leroy",GA,44,6,200,1.908031009,0.377,0,0,0,0,NA
98,6,14628,"GRAMM, William Philip (Phil)",TX,49,6,200,2.305366405,0.551,0,0,0,0,NA
98,6,14629,"GRAY, William Herbert, III",PA,14,2,100,-4.528831718,-0.511,0,0,0,0,11
98,6,14631,"GUARINI, Frank Joseph, Jr.",NJ,12,14,100,-1.925796628,-0.295,0,0,0,1,47
98,6,14632,"HALL, Tony Patrick",OH,24,3,100,-1.454231071,-0.28,0,0,0,0,44
98,6,14633,"HANCE, Kent Ronald",TX,49,19,100,0.415999289,-0.042,0,0,0,0,70
98,6,14635,"HOPKINS, Larry Jones",KY,51,6,200,1.11369512,0.347,1,0,0,1,46
98,6,14636,"HUTTO, Earl Dewitt",FL,43,1,100,0.999495617,-0.007,1,0,0,1,62
98,6,14638,"KOGOVSEK, Raymond Peter",CO,62,3,100,-2.281923533,-0.33,0,0,0,0,57
98,6,14639,"KRAMER, Kenneth Bentley",CO,62,5,200,2.190241892,0.43,1,0,0,1,64
98,6,14641,"LEATH, James Marvin",TX,49,11,100,1.359559893,0.049,1,0,0,1,NA
98,6,14643,"LELAND, George Thomas (Mickey)",TX,49,18,100,-4.260814628,-0.596,0,0,0,0,NA
98,6,14644,"LEWIS, Charles Jeremy (Jerry)",CA,71,35,200,1.739960475,0.348,0,0,0,0,65
98,6,14645,"LOEFFLER, Thomas Gilbert",TX,49,21,200,2.424112154,0.425,0,0,0,0,NA
98,6,14646,"LOWRY, Michael Edward",WA,73,7,100,-3.047005376,-0.401,0,0,0,0,NA
98,6,14647,"LUNGREN, Daniel Edward",CA,71,42,200,2.687054328,0.497,0,0,0,0,65
98,6,14648,"MICA, Daniel Andrew",FL,43,14,100,-0.29209592,-0.184,0,1,0,0,64
98,6,14649,"MATSUI, Robert T.",CA,71,3,100,-1.719302617,-0.404,0,0,0,0,47
98,6,14650,"MAVROULES, Nicholas James",MA,3,6,100,-2.184783847,-0.342,1,0,0,0,45
98,6,14651,"NELSON, Clarence William (Bill)",FL,43,11,100,0.346016532,-0.192,0,0,0,1,64
98,6,14652,"PASHAYAN, Charles, Jr.",CA,71,17,200,1.851178202,0.282,0,0,0,1,56
98,6,14653,"RATCHFORD, William Richard",CT,1,5,100,-2.057786957,-0.355,0,0,0,0,54
98,6,14654,"RITTER, Donald Lawrence",PA,14,15,200,1.079355062,0.268,0,0,0,0,50
98,6,14655,"ROTH, Toby A.",WI,25,8,200,1.181639874,0.351,0,1,0,1,56
98,6,14656,"SABO, Martin Olav",MN,33,5,100,-3.430266055,-0.516,0,0,0,0,32
98,6,14657,"SENSENBRENNER, Frank James, Jr.",WI,25,9,200,1.005274162,0.646,0,0,0,0,59
98,6,14658,"SHANNON, James Michael",MA,3,5,100,-3.152412319,-0.465,0,0,0,0,44
98,6,14659,"SHELBY, Richard C.",AL,41,7,100,1.004010037,0.013,0,0,0,0,49
98,6,14660,"SHUMWAY, Norman David",CA,71,14,200,4.040736323,0.556,0,0,0,0,58
98,6,14661,"SNOWE, Olympia Jean",ME,2,2,200,-0.306696008,0.091,0,1,1,0,47
98,6,14662,"SOLOMON, Gerald Brooks Hunt",NY,13,24,200,2.879524932,0.492,0,1,0,1,55
98,6,14664,"STENHOLM, Charles Walter",TX,49,17,100,1.264252597,0.019,0,0,0,0,55
98,6,14666,"SWIFT, Allan Byron",WA,73,2,100,-2.201776802,-0.43,0,0,0,0,NA
98,6,14667,"SYNAR, Michael Lynn",OK,53,2,100,-1.220899645,-0.321,0,0,0,0,57
98,6,14668,"TAUKE, Thomas Joseph",IA,31,2,200,-0.19139861,0.27,0,0,0,0,50
98,6,14669,"THOMAS, William Marshall",CA,71,20,200,1.806465202,0.371,0,0,0,0,62
98,6,14670,"WHITTAKER, Robert Russell",KS,32,5,200,1.192158748,0.346,0,0,0,0,60
98,6,14671,"WILLIAMS, Lyle",OH,24,17,200,0.067980389,0.037,0,0,0,1,42
98,6,14672,"WILLIAMS, John Patrick",MT,64,1,100,-1.721925704,-0.315,0,0,0,1,57
98,6,14673,"WOLPE, Howard Eliot, III",MI,23,3,100,-3.21025858,-0.374,0,1,0,0,NA
98,6,14675,"PETRI, Thomas Evert",WI,25,6,200,0.733096171,0.379,0,0,0,0,55
98,6,14677,"PORTER, John Edward",IL,21,10,200,0.312781819,0.217,0,0,0,1,NA
98,6,14679,"TAUZIN, Wilbert Joseph (Billy)",LA,45,3,100,0.739949966,0.03,0,0,0,0,58
98,6,14681,"CROCKETT, George William, Jr.",MI,23,13,100,-1.71713161,-0.651,0,1,0,0,NA
98,6,14802,"BLILEY, Thomas Jerome, Jr.",VA,40,3,200,2.125541391,0.382,0,0,0,1,58
98,6,14803,"BROWN, George Hanks (Hank)",CO,62,4,200,0.674560432,0.511,0,0,0,1,58
98,6,14805,"CHAPPIE, Eugene A.",CA,71,2,200,1.923330147,0.414,0,0,0,1,57
98,6,14806,"COATS, Daniel Ray",IN,22,4,200,1.417446846,0.375,0,0,0,1,59
98,6,14808,"COYNE, William Joseph",PA,14,14,100,-2.234686596,-0.494,0,0,0,1,34
98,6,14809,"CRAIG, Larry Edwin",ID,63,1,200,2.872912952,0.494,0,0,0,0,63
98,6,14810,"DAUB, Harold John, Jr., (Hal)",NE,35,2,200,1.561696937,0.391,0,0,0,1,62
98,6,14812,"DORGAN, Byron Leslie",ND,36,1,100,-1.389300076,-0.267,0,0,0,0,64
98,6,14813,"DREIER, David Timothy",CA,71,33,200,3.618077633,0.478,0,0,0,0,64
98,6,14815,"DWYER, Bernard James",NJ,12,6,100,-2.171916846,-0.373,0,0,0,1,50
98,6,14816,"DYMALLY, Mervyn Malcolm",CA,71,31,100,-2.287321697,-0.685,0,1,0,0,35
98,6,14817,"DYSON, Royden Patrick",MD,52,1,100,0.44968703,-0.104,1,0,0,0,52
98,6,14818,"ECKART, Dennis Edward",OH,24,11,100,-1.596612424,-0.242,0,0,0,0,52
98,6,14818,"ECKART, Dennis Edward",OH,24,11,100,-1.596612424,-0.242,0,0,0,0,52
98,6,14818,"ECKART, Dennis Edward",OH,24,11,100,-1.596612424,-0.242,0,0,0,0,52
98,6,14818,"ECKART, Dennis Edward",OH,24,11,100,-1.596612424,-0.242,0,0,0,0,52
98,6,14819,"EMERSON, Norvell William (Bill)",MO,34,8,200,1.843371342,0.332,0,0,0,1,54
98,6,14820,"EVANS, Thomas Cooper",IA,31,3,200,-0.150761362,0.247,0,0,0,1,49
98,6,14821,"FIEDLER, Bobbi",CA,71,21,200,1.641960828,0.343,0,0,1,0,65
98,6,14822,"FIELDS, Jack Milton, Jr.",TX,49,8,200,2.211503861,0.541,0,0,0,0,NA
98,6,14823,"FOGLIETTA, Thomas Michael",PA,14,1,100,-2.160107947,-0.506,1,0,0,0,35
98,6,14824,"FRANK, Barney",MA,3,4,100,-3.502164019,-0.499,0,0,0,0,40
98,6,14825,"GEJDENSON, Samuel",CT,1,2,100,-2.481267089,-0.416,0,1,0,0,47
98,6,14826,"GREGG, Judd Alan",NH,4,2,200,0.85535544,0.429,0,0,0,0,56
98,6,14827,"GUNDERSON, Steven Craig",WI,25,3,200,0.215007572,0.203,0,0,0,0,49
98,6,14828,"HALL, Ralph Moody",TX,49,4,100,0.961298474,0.096,0,0,0,1,58
98,6,14829,"HANSEN, James Vear",UT,67,1,200,3.568900178,0.496,0,0,0,1,77
98,6,14830,"HARTNETT, Thomas Forbes",SC,48,1,200,3.630749875,0.503,1,0,0,1,55
98,6,14831,"HATCHER, Charles Floyd",GA,44,2,100,0.517465108,-0.202,0,0,0,1,NA
98,6,14833,"HERTEL, Dennis Mark",MI,23,14,100,-1.805695992,-0.345,1,0,0,0,NA
98,6,14834,"HILER, John Patrick",IN,22,3,200,1.685402418,0.413,0,0,0,0,57
98,6,14835,"HUNTER, Duncan Lee",CA,71,45,200,2.065339645,0.47,1,0,0,1,62
98,6,14837,"LANTOS, Thomas Peter",CA,71,11,100,-1.889313441,-0.376,0,1,0,0,45
98,6,14839,"LOWERY, William David",CA,71,41,200,1.557461687,0.33,0,0,0,0,60
98,6,14840,"MARTIN, David O'Brien",NY,13,26,200,1.360572609,0.232,1,0,0,1,51
98,6,14841,"MARTIN, Lynn Morley",IL,21,16,200,0.15022987,0.345,0,0,1,0,56
98,6,14842,"McCOLLUM, Ira William, Jr. (Bill)",FL,43,5,200,1.979437508,0.377,0,0,0,1,64
98,6,14843,"McCURDY, David Keith",OK,53,4,100,-0.022199084,-0.112,1,0,0,0,62
98,6,14844,"McEWEN, Bob",OH,24,6,200,2.225527801,0.359,0,0,0,0,57
98,6,14845,"McGRATH, Raymond Joseph",NY,13,5,200,1.16424766,0.185,0,0,0,0,NA
98,6,14846,"MOLINARI, Guy Victor",NY,13,14,200,1.256902054,0.255,0,0,0,1,60
98,6,14847,"MORRISON, Sidney Wallace",WA,73,4,200,0.616705258,0.153,0,0,0,1,58
98,6,14850,"PATMAN, William Neff",TX,49,14,100,1.339534928,-0.03,0,0,0,1,59
98,6,14852,"ROBERTS, Charles Patrick (Pat)",KS,32,1,200,1.368127485,0.415,0,0,0,1,67
98,6,14853,"ROEMER, Charles Elson (Buddy), III",LA,45,4,100,0.664418792,0.178,0,0,0,0,54
98,6,14854,"ROGERS, Harold Dallas (Hal)",KY,51,5,200,1.855418956,0.331,0,0,0,1,62
98,6,14855,"ROUKEMA, Margaret Scafati",NJ,12,5,200,-0.446821067,0.162,0,0,1,0,62
98,6,14856,"SAVAGE, Gus",IL,21,2,100,-3.432990188,-0.671,0,0,0,1,NA
98,6,14857,"SCHNEIDER, Claudine",RI,5,2,200,-1.370145092,-0.026,0,0,1,0,38
98,6,14858,"SCHUMER, Charles Ellis (Chuck)",NY,13,10,100,-2.769657976,-0.35,0,0,0,0,NA
98,6,14860,"SHAW, Eugene Clay, Jr.",FL,43,15,200,1.543844406,0.3,0,0,0,0,62
98,6,14861,"SKEEN, Joseph Richard",NM,66,2,200,1.634359534,0.301,0,0,0,1,61
98,6,14863,"SMITH, Christopher Henry",NJ,12,4,200,0.096050373,0.158,0,0,0,0,45
98,6,14864,"SMITH, Dennis Alan (Denny)",OR,72,5,200,3.755396194,0.603,0,0,0,1,50
98,6,14866,"WASHINGTON, Harold",IL,21,1,100,-3.855822584,-0.488,0,0,0,1,NA
98,6,14866,"WASHINGTON, Harold",IL,21,1,100,-3.855822584,-0.488,0,0,0,1,NA
98,6,14868,"WEBER, John Vincent (Vin)",MN,33,2,200,0.981043319,0.381,0,0,0,0,53
98,6,14869,"WOLF, Frank Rudolph",VA,40,10,200,1.360472198,0.284,0,0,0,1,54
98,6,14870,"WORTLEY, George Cornelius",NY,13,27,200,1.135334179,0.207,0,0,0,1,52
98,6,14871,"WYDEN, Ronald Lee",OR,72,3,100,-2.497263016,-0.314,0,0,0,0,41
98,6,14872,"SILJANDER, Mark Deli",MI,23,4,200,1.965816029,0.406,0,1,0,0,NA
98,6,14873,"HOYER, Steny Hamilton",MD,52,5,100,-1.109969961,-0.379,0,0,0,0,41
98,6,14874,"DOWDY, Charles Wayne",MS,46,4,100,-0.133763128,-0.259,0,0,0,0,50
98,6,14875,"OXLEY, Michael Garver",OH,24,4,200,1.800624523,0.382,0,0,0,0,63
98,6,14879,"MART̍NEZ, Matthew G.",CA,71,30,100,-3.129353339,-0.341,0,0,0,1,49
98,6,14880,"HALL, Katie Beatrice",IN,22,1,100,-3.033654741,-0.529,0,0,1,0,46
98,6,15000,"ACKERMAN, Gary Leonard",NY,13,7,100,-3.111575421,-0.429,0,0,0,0,NA
98,6,15001,"ANDREWS, Michael Allen",TX,49,25,100,-0.047847598,-0.135,0,0,0,0,53
98,6,15002,"BARTLETT, Harry Stephen (Steve)",TX,49,3,200,2.047796825,0.46,0,0,0,0,NA
98,6,15003,"BATEMAN, Herbert Harvell",VA,40,1,200,1.392724037,0.242,0,0,0,1,51
98,6,15004,"BATES, Jim",CA,71,44,100,-2.602377597,-0.279,0,1,0,1,48
98,6,15005,"BERMAN, Howard Lawrence",CA,71,26,100,-2.600624745,-0.404,0,0,0,0,51
98,6,15006,"BILIRAKIS, Michael",FL,43,9,200,1.926334811,0.382,0,0,0,1,59
98,6,15007,"BOEHLERT, Sherwood Louis",NY,13,25,200,-0.450003825,0.103,0,0,0,1,51
98,6,15008,"BORSKI, Robert Anthony, Jr.",PA,14,3,100,-1.960526739,-0.416,0,0,0,0,50
98,6,15009,"BOSCO, Douglas Harry",CA,71,1,100,-2.030500766,-0.271,0,0,0,0,49
98,6,15010,"BOUCHER, Frederick C.",VA,40,9,100,-1.15496323,-0.265,0,0,0,0,49
98,6,15010,"BOUCHER, Frederick C.",VA,40,9,100,-1.15496323,-0.265,0,0,0,0,49
98,6,15010,"BOUCHER, Frederick C.",VA,40,9,100,-1.15496323,-0.265,0,0,0,0,49
98,6,15010,"BOUCHER, Frederick C.",VA,40,9,100,-1.15496323,-0.265,0,0,0,0,49
98,6,15011,"BOXER, Barbara",CA,71,6,100,-4.406594248,-0.45,1,0,1,0,37
98,6,15012,"BRITT, Charles Robin",NC,47,6,100,-0.722327206,-0.178,0,0,0,1,54
98,6,15013,"BRYANT, John Wiley",TX,49,5,100,-1.249877423,-0.358,0,0,0,0,51
98,6,15014,"BURTON, Danny Lee",IN,22,6,200,3.508299475,0.585,0,0,0,1,64
98,6,15015,"CARPER, Thomas Richard",DE,11,1,100,-1.154097495,-0.174,0,0,0,1,47
98,6,15016,"CHANDLER, Rodney Dennis",WA,73,8,200,0.34407703,0.254,0,0,0,0,NA
98,6,15017,"CLARKE, James McClure",NC,47,11,100,-1.009847705,-0.204,1,0,0,1,51
98,6,15018,"COLEMAN, Ronald D'Emory",TX,49,16,100,-0.660821082,-0.402,0,0,0,1,58
98,6,15019,"COOPER, James Hayes Shofner",TN,54,4,100,-0.306498103,-0.162,0,0,0,0,50
98,6,15020,"DeWINE, Michael",OH,24,7,200,2.006152388,0.289,0,0,0,0,56
98,6,15021,"DURBIN, Richard Joseph",IL,21,20,100,-1.492974145,-0.365,0,0,0,0,57
98,6,15022,"ERDREICH, Ben",AL,41,6,100,0.571451779,-0.06,0,0,0,1,55
98,6,15023,"EVANS, Lane Allen",IL,21,17,100,-2.781724926,-0.454,0,1,0,1,57
98,6,15024,"FEIGHAN, Edward Farrell",OH,24,19,100,-1.705117276,-0.304,0,0,0,0,NA
98,6,15025,"FRANKLIN, William Webster",MS,46,2,200,2.04621143,0.303,0,0,0,1,44
98,6,15026,"GEKAS, George William",PA,14,17,200,1.21410078,0.426,0,0,0,1,60
98,6,15027,"HARRISON, Frank Girard",PA,14,11,100,-1.426473747,-0.433,0,0,0,1,51
98,6,15028,"JOHNSON, Nancy Lee",CT,1,6,200,-0.023600878,0.122,0,0,1,0,47
98,6,15029,"KAPTUR, Marcia Carolyn (Marcy)",OH,24,9,100,-2.391091489,-0.349,1,0,1,0,47
98,6,15030,"KASICH, John Richard",OH,24,12,200,1.33765753,0.314,0,0,0,0,56
98,6,15031,"KOLTER, Joseph Paul",PA,14,4,100,-1.192888969,-0.28,0,0,0,1,47
98,6,15032,"LEHMAN, Richard Henry",CA,71,18,100,-2.350988922,-0.27,0,0,0,0,48
98,6,15033,"LEVIN, Sander Martin",MI,23,17,100,-1.832954276,-0.377,0,1,0,0,NA
98,6,15034,"LEVINE, Meldon Edises",CA,71,27,100,-2.199228592,-0.436,0,0,0,0,45
98,6,15035,"LEWIS, Thomas F.",FL,43,12,200,1.612474019,0.387,0,0,0,1,60
98,6,15036,"LIPINSKI, William Oliver",IL,21,5,100,-0.02548749,-0.176,0,1,0,1,NA
98,6,15037,"MACK, Connie, III",FL,43,13,200,2.262204051,0.466,0,0,0,0,71
98,6,15038,"MacKAY, Kenneth Hood, Jr. (Buddy)",FL,43,6,100,-0.786372106,-0.13,0,0,0,1,55
98,6,15039,"McCAIN, John Sidney, III",AZ,61,1,200,1.691476584,0.381,0,0,0,1,65
98,6,15040,"McCANDLESS, Alfred A.",CA,71,37,200,2.326950943,0.474,1,0,0,1,61
98,6,15041,"McCLOSKEY, Francis Xavier",IN,22,8,100,-1.289539627,-0.336,0,0,0,1,54
98,6,15042,"McKERNAN, John Rettie, Jr.",ME,2,1,200,-0.277616757,0.137,0,0,0,0,46
98,6,15043,"McNULTY, James Francis, Jr.",AZ,61,5,100,-1.739349678,-0.296,0,0,0,0,57
98,6,15044,"MOODY, Jim",WI,25,5,100,-2.32617068,-0.347,0,0,0,0,NA
98,6,15045,"MORRISON, Bruce Andrew",CT,1,3,100,-3.078243497,-0.396,0,0,0,0,51
98,6,15046,"MRAZEK, Robert Jan",NY,13,3,100,-1.719196738,-0.349,0,0,0,1,NA
98,6,15047,"NIELSON, Howard Curtis",UT,67,3,200,2.467438952,0.505,0,0,0,1,78
98,6,15048,"OLIN, James R.",VA,40,6,100,-0.568037023,-0.119,0,0,0,1,55
98,6,15049,"ORTIZ, Solomon P.",TX,49,27,100,-0.183878863,-0.272,1,0,0,1,NA
98,6,15050,"OWENS, Major Robert Odell",NY,13,12,100,-3.423523114,-0.569,0,0,0,0,NA
98,6,15051,"PACKARD, Ronald C.",CA,71,43,200,2.132852966,0.419,0,0,0,1,71
98,6,15052,"PENNY, Timothy Joseph",MN,33,1,100,-1.511518621,-0.051,0,0,0,0,50
98,6,15052,"PENNY, Timothy Joseph",MN,33,1,100,-1.511518621,-0.051,0,0,0,0,50
98,6,15052,"PENNY, Timothy Joseph",MN,33,1,100,-1.511518621,-0.051,0,0,0,0,50
98,6,15052,"PENNY, Timothy Joseph",MN,33,1,100,-1.511518621,-0.051,0,0,0,0,50
98,6,15053,"RAY, Richard Belmont",GA,44,3,100,0.817988431,0.035,1,0,0,1,NA
98,6,15054,"REID, Harry",NV,65,1,100,-1.121263516,-0.276,0,1,0,0,62
98,6,15055,"RICHARDSON, Bill",NM,66,3,100,-1.510315853,-0.321,0,0,0,0,53
98,6,15056,"RIDGE, Thomas Joseph",PA,14,21,200,0.223557993,0.186,0,0,0,1,49
98,6,15057,"ROWLAND, James Roy, Jr.",GA,44,8,100,0.342491112,-0.127,0,0,0,1,NA
98,6,15058,"SCHAEFER, Daniel",CO,62,6,200,2.606258721,0.479,0,0,0,1,60
98,6,15058,"SCHAEFER, Daniel",CO,62,6,200,2.606258721,0.479,0,0,0,1,60
98,6,15059,"SIKORSKI, Gerald Edward",MN,33,6,100,-2.487994351,-0.217,1,0,0,0,43
98,6,15060,"SISISKY, Norman",VA,40,4,100,0.488003979,-0.122,0,0,0,1,47
98,6,15061,"SLATTERY, James Charles",KS,32,2,100,-0.412054059,-0.099,0,0,0,0,56
98,6,15062,"SMITH, Lawrence Jack",FL,43,16,100,-1.489210724,-0.355,0,1,0,0,62
98,6,15063,"SMITH, Robert Freeman",OR,72,2,200,1.673464817,0.396,1,0,0,0,59
98,6,15064,"SPRATT, John McKee, Jr.",SC,48,5,100,-0.5258777,-0.256,0,0,0,1,45
98,6,15065,"STAGGERS, Harley Orrin, Jr.",WV,56,2,100,-1.153980818,-0.315,0,0,0,0,47
98,6,15066,"SUNDQUIST, Donald Kenneth",TN,54,7,200,1.818253498,0.371,0,0,0,1,57
98,6,15068,"TALLON, Robert Mooneyhan, Jr. (Robin)",SC,48,6,100,-0.419362301,-0.1,0,0,0,0,45
98,6,15069,"THOMAS, Robert Lindsay",GA,44,1,100,0.199083916,-0.14,0,0,0,0,NA
98,6,15070,"TORRES, Esteban Edward",CA,71,34,100,-2.715270371,-0.487,0,1,0,1,52
98,6,15071,"TORRICELLI, Robert Guy",NJ,12,9,100,-1.523048556,-0.262,0,0,0,0,54
98,6,15072,"TOWNS, Edolphus",NY,13,11,100,-2.802769205,-0.519,0,0,0,1,NA
98,6,15073,"VALENTINE, Itimous Thaddeus, Jr., (Tim)",NC,47,2,100,0.155629216,-0.084,0,0,0,1,44
98,6,15074,"VANDERGRIFF, Tommy (Tom) Joe",TX,49,26,100,0.649091741,0.029,0,0,0,0,69
98,6,15075,"VUCANOVICH, Barbara Farrell",NV,65,2,200,2.137471001,0.441,0,0,1,0,67
98,6,15076,"WHEAT, Alan Dupree",MO,34,5,100,-3.036520045,-0.465,0,0,0,0,40
98,6,15077,"WISE, Robert Ellsworth, Jr.",WV,56,3,100,-1.298558229,-0.32,0,1,0,0,47
98,6,15078,"ZSCHAU, Edwin Van Wyck",CA,71,12,200,0.288622201,0.345,0,1,0,0,54
98,6,15079,"HAYES, Charles Arthur",IL,21,1,100,-3.043141399,-0.656,0,0,0,0,NA
98,6,15079,"HAYES, Charles Arthur",IL,21,1,100,-3.043141399,-0.656,0,0,0,0,NA
98,6,15080,"BURTON, Sala Galante",CA,71,5,100,-3.285971483,-0.585,1,0,1,0,33
98,6,15080,"BURTON, Sala Galante",CA,71,5,100,-3.285971483,-0.585,1,0,1,0,33
98,6,15081,"DARDEN, George (Buddy)",GA,44,7,100,0.304232842,-0.161,0,0,0,0,NA
98,6,15081,"DARDEN, George (Buddy)",GA,44,7,100,0.304232842,-0.161,0,0,0,0,NA
98,6,15082,"KLECZKA, Gerald Daniel",WI,25,4,100,-1.820207618,-0.322,0,0,0,1,NA
98,6,15082,"KLECZKA, Gerald Daniel",WI,25,4,100,-1.820207618,-0.322,0,0,0,1,NA
98,6,15083,"MOLLOHAN, Alan Bowlby",WV,56,1,100,-0.597036687,-0.292,0,0,0,1,47
98,6,94428,"IRELAND, Andrew Poysell (Andy)",FL,43,10,100,0.941711413,0.015,0,0,0,0,60
99,7,633,"BENNETT, Charles Edward",FL,43,3,100,-0.634666012,-0.088,1,0,0,1,59
99,7,830,"BOLAND, Edward Patrick",MA,3,2,100,-1.792427104,-0.306,0,0,0,1,53
99,7,1077,"BROOKS, Jack Bascom",TX,49,9,100,-1.499131837,-0.407,0,0,0,1,52
99,7,1087,"BROOMFIELD, William S.",MI,23,18,200,1.662230769,0.227,0,1,0,0,75
99,7,2009,"CONTE, Silvio Ottavio",MA,3,1,200,-1.377392427,-0.023,0,0,0,1,51
99,7,2605,"DINGELL, John David, Jr.",MI,23,16,100,-1.845485075,-0.448,0,0,0,1,60
99,7,3078,"FASCELL, Dante Bruno",FL,43,19,100,-0.857111624,-0.4,0,1,0,1,65
99,7,5101,"KASTENMEIER, Robert William",WI,25,2,100,-3.224047846,-0.514,0,0,0,1,49
99,7,5495,"LATTA, Delbert Leroy",OH,24,5,200,2.090266624,0.391,0,0,0,0,67
99,7,6455,"MICHEL, Robert Henry",IL,21,18,200,2.317417203,0.372,0,0,0,1,62
99,7,6845,"NATCHER, William Huston",KY,51,2,100,-0.789560551,-0.288,0,0,0,1,63
99,7,7081,"O'NEILL, Thomas Philip, Jr. (Tip)",MA,3,8,100,-2.823817897,-0.402,0,0,0,0,36
99,7,7333,"PEPPER, Claude Denson",FL,43,18,100,-0.658254174,-0.422,0,0,0,0,60
99,7,7610,"PRICE, Charles Melvin",IL,21,21,100,-1.056833023,-0.429,1,0,0,1,53
99,7,8010,"RODINO, Peter Wallace, Jr.",NJ,12,10,100,-4.089968032,-0.435,0,0,0,1,25
99,7,8080,"ROSTENKOWSKI, Daniel David",IL,21,8,100,-1.862512281,-0.39,0,0,0,1,51
99,7,8672,"SMITH, Neal Edward",IA,31,4,100,-1.174145727,-0.313,0,0,0,1,49
99,7,9017,"STRATTON, Samuel Studdiford",NY,13,23,100,1.032602042,-0.139,1,0,0,1,53
99,7,10075,"WHITTEN, Jamie Lloyd",MS,46,1,100,-0.58143544,-0.161,0,0,0,0,63
99,7,10391,"WRIGHT, James Claude, Jr.",TX,49,12,100,-1.340143617,-0.383,0,0,0,1,58
99,7,10421,"YATES, Sidney Richard",IL,21,9,100,-3.081553076,-0.494,0,0,0,1,45
99,7,10500,"ADDABBO, Joseph Patrick",NY,13,6,100,-3.023890462,-0.402,0,0,0,0,33
99,7,10500,"ADDABBO, Joseph Patrick",NY,13,6,100,-3.023890462,-0.402,0,0,0,0,33
99,7,10520,"GONŹLEZ, Henry B.",TX,49,20,100,-2.618281922,-0.538,0,0,0,0,41
99,7,10561,"ST. GERMAIN, Fernand Joseph",RI,5,1,100,-2.349441816,-0.355,0,0,0,1,50
99,7,10566,"UDALL, Morris King",AZ,61,2,100,-2.253903636,-0.387,0,1,0,1,51
99,7,10573,"BROWN, George Edward, Jr.",CA,71,36,100,-2.970113576,-0.506,0,0,0,1,56
99,7,10574,"BROYHILL, James Thomas",NC,47,10,200,1.477200983,0.269,0,0,0,0,70
99,7,10583,"EDWARDS, William Donlon (Don)",CA,71,10,100,-3.926562121,-0.599,0,0,0,1,51
99,7,10587,"FUQUA, Don",FL,43,2,100,0.098221957,-0.173,0,0,0,1,62
99,7,10588,"GIBBONS, Sam Melville",FL,43,7,100,-0.745662086,-0.233,0,0,0,1,63
99,7,10595,"HAWKINS, Augustus Freeman (Gus)",CA,71,29,100,-3.325188129,-0.517,0,0,0,0,22
99,7,10596,"HORTON, Frank Jefferson",NY,13,29,200,-0.416187262,-0.004,0,0,0,1,61
99,7,10607,"McDADE, Joseph Michael",PA,14,10,200,0.240213475,0.093,0,0,0,0,61
99,7,10614,"PICKLE, James Jarrell (Jake)",TX,49,10,100,-0.371557426,-0.218,0,0,0,1,58
99,7,10616,"QUILLEN, James Henry",TN,54,1,200,1.950404932,0.246,0,0,0,1,71
99,7,10621,"ROYBAL, Edward R.",CA,71,25,100,-3.011984584,-0.61,0,0,0,1,39
99,7,10626,"SNYDER, Marion Gene",KY,51,4,200,2.146788327,0.26,0,0,0,0,70
99,7,10703,"ANNUNZIO, Frank",IL,21,11,100,-1.427496154,-0.398,0,0,0,0,59
99,7,10713,"CONYERS, John, Jr.",MI,23,1,100,-2.853520828,-0.658,0,0,0,1,14
99,7,10716,"de la GARZA, Eligio, II (Kika)",TX,49,15,100,-0.695898941,-0.255,0,0,0,1,46
99,7,10717,"DICKINSON, William Louis",AL,41,2,200,1.882633799,0.398,1,0,0,1,63
99,7,10719,"DUNCAN, John James",TN,54,2,200,1.549016495,0.194,0,0,0,1,64
99,7,10726,"FOLEY, Thomas Stephen",WA,73,5,100,-1.90371777,-0.354,0,0,0,0,60
99,7,10727,"FORD, William David",MI,23,15,100,-2.876546429,-0.516,0,0,0,1,61
99,7,10732,"HAMILTON, Lee Herbert",IN,22,9,100,-1.357683795,-0.171,0,1,0,0,60
99,7,10739,"HOWARD, James John",NJ,12,3,100,-2.44633604,-0.431,0,0,0,1,67
99,7,10742,"JACOBS, Andrew, Jr.",IN,22,10,100,-1.526400694,-0.07,0,0,0,1,48
99,7,10768,"SCHEUER, James Haas",NY,13,8,100,-2.797162249,-0.478,0,0,0,1,47
99,7,10788,"JONES, Walter Beaman, Sr.",NC,47,1,100,-1.347011285,-0.259,0,0,0,0,57
99,7,10794,"VANDER JAGT, Guy Adrian",MI,23,9,200,1.611633364,0.247,0,0,0,0,69
99,7,11000,"BEVILL, Tom",AL,41,4,100,0.355629663,-0.213,0,0,0,1,59
99,7,11020,"HAMMERSCHMIDT, John Paul",AR,42,3,200,2.121525966,0.253,0,0,0,1,70
99,7,11034,"MILLER, Clarence E.",OH,24,10,200,2.206284538,0.416,0,0,0,0,66
99,7,11035,"MONTGOMERY, Gillespie V. (Sonny)",MS,46,3,100,1.468633917,0.017,1,0,0,1,65
99,7,11036,"MYERS, John Thomas",IN,22,7,200,1.967518709,0.236,0,0,0,1,66
99,7,11037,"NICHOLS, William Flynt",AL,41,3,100,1.080134925,-0.042,1,0,0,1,60
99,7,11058,"WYLIE, Chalmers Pangburn",OH,24,15,200,0.988276123,0.23,0,0,0,1,66
99,7,11067,"GAYDOS, Joseph Matthew",PA,14,20,100,-0.481984768,-0.278,0,0,0,1,37
99,7,12000,"ALEXANDER, William Vollie (Bill), Jr.",AR,42,1,100,-1.234822073,-0.41,0,0,0,1,57
99,7,12001,"ANDERSON, Glenn Malcolm",CA,71,32,100,-1.227651012,-0.269,0,0,0,1,58
99,7,12003,"BIAGGI, Mario",NY,13,19,100,-0.702409369,-0.339,0,0,0,0,52
99,7,12007,"CHAPPELL, William Venroe, Jr.",FL,43,4,100,0.411801947,-0.098,0,0,0,1,67
99,7,12009,"CLAY, William Lacy, Sr.",MO,34,1,100,-4.799636333,-0.49,0,0,0,1,37
99,7,12010,"COUGHLIN, Robert Lawrence",PA,14,13,200,-0.301843333,0.204,0,0,0,1,60
99,7,12011,"DANIEL, Wilbur Clarence (Dan)",VA,40,5,100,1.241023389,0.161,1,0,0,1,65
99,7,12013,"FISH, Hamilton, Jr.",NY,13,21,200,-0.270679793,0.07,0,0,0,1,68
99,7,12022,"LUJ́N, Manuel, Jr.",NM,66,1,200,1.525474052,0.272,0,0,0,0,60
99,7,12030,"STOKES, Louis",OH,24,21,100,-4.9355191,-0.578,0,0,0,1,21
99,7,12033,"WHITEHURST, George William",VA,40,2,200,1.824974769,0.233,1,0,0,1,63
99,7,12035,"YATRON, Gus",PA,14,6,100,-0.912329419,-0.174,0,1,0,0,64
99,7,12036,"OBEY, David Ross",WI,25,7,100,-3.038019713,-0.45,0,0,0,0,53
99,7,12038,"JONES, Ed",TN,54,8,100,-0.576924733,-0.245,0,0,0,0,57
99,7,12041,"CRANE, Philip Miller",IL,21,12,200,3.4204004,0.739,0,0,0,1,77
99,7,12042,"ROE, Robert A.",NJ,12,8,100,-1.619737252,-0.326,0,0,0,1,58
99,7,13002,"ARCHER, William Reynolds, Jr.",TX,49,7,200,3.139413171,0.496,0,0,0,1,83
99,7,13003,"ASPIN, Leslie",WI,25,1,100,-0.93351445,-0.32,1,0,0,1,55
99,7,13011,"DELLUMS, Ronald V.",CA,71,8,100,-3.351778173,-0.644,1,0,0,1,34
99,7,13015,"FRENZEL, William Eldridge",MN,33,3,200,0.502777562,0.353,0,0,0,1,59
99,7,13018,"HILLIS, Elwood Haynes",IN,22,5,200,1.567740962,0.173,1,0,0,1,69
99,7,13018,"HILLIS, Elwood Haynes",IN,22,5,200,1.567740962,0.173,1,0,0,1,69
99,7,13018,"HILLIS, Elwood Haynes",IN,22,5,200,1.567740962,0.173,1,0,0,1,69
99,7,13018,"HILLIS, Elwood Haynes",IN,22,5,200,1.567740962,0.173,1,0,0,1,69
99,7,13020,"KEMP, Jack French",NY,13,31,200,1.985585291,0.3,0,0,0,1,62
99,7,13021,"LENT, Norman Frederick",NY,13,4,200,1.333917194,0.183,0,0,0,1,64
99,7,13024,"MAZZOLI, Romano Louis",KY,51,3,100,-0.405385287,-0.186,0,0,0,1,52
99,7,13029,"McKINNEY, Stewart Brett",CT,1,4,200,-1.224407461,-0.006,0,0,0,1,63
99,7,13031,"MITCHELL, Parren James",MD,52,7,100,-3.914298438,-0.526,0,0,0,1,18
99,7,13035,"RANGEL, Charles B.",NY,13,16,100,-3.829136652,-0.514,0,0,0,1,16
99,7,13040,"SEIBERLING, John Frederick",OH,24,14,100,-3.319266281,-0.496,0,0,0,1,51
99,7,13042,"SPENCE, Floyd Davidson",SC,48,2,200,2.340157861,0.32,1,0,0,1,62
99,7,13047,"YOUNG, Charles William (Bill)",FL,43,8,200,1.820518801,0.325,0,0,0,1,63
99,7,13056,"BREAUX, John Berlinger",LA,45,7,100,0.6302051,-0.123,0,0,0,0,59
99,7,14015,"GILMAN, Benjamin Arthur",NY,13,22,200,0.251521297,0.043,0,1,0,1,61
99,7,14021,"HOLT, Marjorie Sewell",MD,52,4,200,2.100201227,0.368,1,0,1,0,59
99,7,14026,"JONES, James Robert",OK,53,1,100,-0.466406284,-0.095,0,0,0,1,70
99,7,14029,"LEHMAN, William",FL,43,17,100,-3.299913375,-0.483,0,0,0,0,46
99,7,14031,"LOTT, Chester Trent",MS,46,5,200,2.237422008,0.39,0,0,0,0,74
99,7,14033,"MADIGAN, Edward Rell",IL,21,15,200,1.421439953,0.247,0,0,0,0,68
99,7,14039,"MOAKLEY, John Joseph",MA,3,9,100,-2.50612554,-0.418,0,0,0,1,48
99,7,14040,"MOORHEAD, Carlos John",CA,71,22,200,2.711694604,0.465,0,0,0,1,72
99,7,14041,"O'BRIEN, George Miller",IL,21,4,200,0.775016515,0.169,0,0,0,1,50
99,7,14043,"PARRIS, Stanford E.",VA,40,8,200,1.890064729,0.287,0,0,0,1,61
99,7,14045,"REGULA, Ralph Straus",OH,24,16,200,0.642133911,0.221,0,0,0,1,62
99,7,14046,"RINALDO, Matthew John",NJ,12,7,200,0.35089124,0.023,0,0,0,0,63
99,7,14048,"ROSE, Charles Grandison, III",NC,47,7,100,-1.067529408,-0.319,0,0,0,0,57
99,7,14051,"SCHROEDER, Patricia Scott",CO,62,1,100,-1.94039117,-0.225,1,0,1,0,47
99,7,14052,"SHUSTER, E. G. (Bud)",PA,14,9,200,2.450584085,0.416,0,0,0,1,66
99,7,14053,"STARK, Fortney Hillman (Pete), Jr.",CA,71,9,100,-4.509404915,-0.631,0,0,0,1,50
99,7,14055,"STUDDS, Gerry Eastman",MA,3,10,100,-4.756827699,-0.444,0,1,0,0,55
99,7,14057,"TAYLOR, Gene",MO,34,7,200,2.223940001,0.328,0,0,0,0,69
99,7,14062,"WILSON, Charles",TX,49,2,100,0.36009743,-0.196,0,0,0,1,58
99,7,14066,"YOUNG, Donald Edwin",AK,81,1,200,1.190757981,0.278,0,0,0,1,62
99,7,14067,"BOGGS, Corinne Claiborne (Lindy)",LA,45,2,100,-1.178467879,-0.359,0,0,1,0,37
99,7,14068,"COLLINS, Cardiss",IL,21,7,100,-3.799751946,-0.552,0,0,1,0,25
99,7,14070,"LUKEN, Thomas Andrew",OH,24,1,100,-1.715985527,-0.163,0,0,0,1,65
99,7,14071,"LAGOMARSINO, Robert John",CA,71,19,200,1.868182389,0.378,0,1,0,1,62
99,7,14072,"MURTHA, John Patrick, Jr.",PA,14,12,100,0.080027493,-0.265,0,0,0,1,50
99,7,14075,"TRAXLER, Jerome Bob",MI,23,8,100,-2.041997597,-0.33,0,0,0,1,60
99,7,14201,"AuCOIN, Les",OR,72,1,100,-2.081403914,-0.231,0,0,0,1,57
99,7,14205,"BEDELL, Berkley Warren",IA,31,6,100,-3.038040485,-0.24,0,0,0,1,57
99,7,14208,"BONKER, Don Leroy",WA,73,3,100,-1.9233084,-0.336,0,1,0,1,53
99,7,14210,"CARR, Milton Robert (Bob)",MI,23,6,100,-1.303812809,-0.254,0,0,0,0,63
99,7,14212,"DERRICK, Butler Carson, Jr.",SC,48,3,100,-1.099296586,-0.215,0,0,0,0,67
99,7,14214,"DOWNEY, Thomas Joseph",NY,13,2,100,-2.674175799,-0.384,0,0,0,0,66
99,7,14216,"EARLY, Joseph Daniel",MA,3,3,100,-2.230503279,-0.254,0,0,0,1,57
99,7,14217,"EDGAR, Robert William",PA,14,7,100,-2.994309001,-0.334,0,0,0,0,62
99,7,14219,"ENGLISH, Glenn Lee, Jr.",OK,53,6,100,0.170229385,-0.027,0,0,0,0,69
99,7,14223,"FLORIO, James Joseph",NJ,12,1,100,-1.555311216,-0.318,0,0,0,1,55
99,7,14224,"FORD, Harold Eugene",TN,54,9,100,-3.430074673,-0.438,0,0,0,0,36
99,7,14225,"GRADISON, Willis David, Jr.",OH,24,2,200,0.36390056,0.233,0,0,0,0,64
99,7,14233,"HEFNER, Willie Gathrel (Bill)",NC,47,8,100,-0.631028787,-0.264,0,0,0,0,66
99,7,14237,"HUBBARD, Carroll, Jr.",KY,51,1,100,0.679881316,-0.038,0,0,0,0,54
99,7,14238,"HUGHES, William John",NJ,12,2,100,-1.037700469,-0.153,0,0,0,0,62
99,7,14239,"HYDE, Henry John",IL,21,6,200,2.251076799,0.312,0,1,0,1,56
99,7,14240,"JEFFORDS, James Merrill",VT,6,1,200,-1.035475183,0.014,0,0,0,1,58
99,7,14245,"KINDNESS, Thomas Norman",OH,24,8,200,2.231857238,0.419,0,0,0,0,73
99,7,14248,"LaFALCE, John Joseph",NY,13,32,100,-1.585850537,-0.357,0,0,0,1,55
99,7,14251,"LLOYD, Marilyn Laird",TN,54,3,100,0.716255717,-0.058,1,0,1,0,63
99,7,14253,"McHUGH, Matthew Francis",NY,13,28,100,-2.211908528,-0.353,0,0,0,0,61
99,7,14256,"MILLER, George",CA,71,7,100,-3.556783539,-0.552,0,0,0,0,52
99,7,14257,"MINETA, Norman Y.",CA,71,13,100,-2.797632312,-0.479,0,0,0,1,58
99,7,14259,"MOORE, William Henson, III",LA,45,6,200,1.769938554,0.24,0,0,0,1,64
99,7,14262,"NEAL, Stephen Lybrook",NC,47,5,100,-0.976142415,-0.145,0,0,0,0,64
99,7,14264,"NOWAK, Henry James",NY,13,33,100,-2.181146486,-0.332,0,0,0,1,37
99,7,14265,"OBERSTAR, James Louis",MN,33,8,100,-3.347643177,-0.553,0,0,0,0,40
99,7,14271,"RUSSO, Martin Anthony",IL,21,3,100,-1.97201967,-0.192,0,0,0,0,65
99,7,14273,"SCHULZE, Richard Taylor",PA,14,5,200,1.075058313,0.271,0,0,0,1,66
99,7,14274,"SHARP, Philip Riley",IN,22,2,100,-1.441925668,-0.166,0,0,0,0,68
99,7,14276,"SMITH, Virginia Dodd",NE,35,3,200,0.905918287,0.238,0,0,1,0,78
99,7,14277,"SOLARZ, Stephen Joshua",NY,13,13,100,-2.391734698,-0.429,0,1,0,0,47
99,7,14277,"SOLARZ, Stephen Joshua",NY,13,13,100,-2.391734698,-0.429,0,1,0,0,47
99,7,14277,"SOLARZ, Stephen Joshua",NY,13,13,100,-2.391734698,-0.429,0,1,0,0,47
99,7,14277,"SOLARZ, Stephen Joshua",NY,13,13,100,-2.391734698,-0.429,0,1,0,0,47
99,7,14280,"WAXMAN, Henry Arnold",CA,71,24,100,-3.307341783,-0.473,0,0,0,0,44
99,7,14281,"WEAVER, James Howard",OR,72,4,100,-3.251022031,-0.311,0,0,0,1,54
99,7,14282,"WIRTH, Timothy E.",CO,62,2,100,-1.694728854,-0.293,0,0,0,0,61
99,7,14288,"GOODLING, William Franklin",PA,14,19,200,0.496832501,0.336,0,0,0,1,67
99,7,14289,"LUNDINE, Stanley Nelson",NY,13,34,100,-2.351869473,-0.31,0,0,0,0,68
99,7,14291,"HALL, Sam Blakeley, Jr.",TX,49,1,100,0.81739492,0.054,0,0,0,1,61
99,7,14291,"HALL, Sam Blakeley, Jr.",TX,49,1,100,0.81739492,0.054,0,0,0,1,61
99,7,14400,"AKAKA, Daniel Kahikina",HI,82,2,100,-1.678893271,-0.419,0,0,0,1,56
99,7,14402,"APPLEGATE, Douglas Earl",OH,24,18,100,-0.864071553,-0.106,0,0,0,0,53
99,7,14403,"BADHAM, Robert Edward",CA,71,40,200,2.90224762,0.541,1,0,0,1,75
99,7,14404,"BARNARD, Druie Douglas, Jr.",GA,44,10,100,0.834384446,-0.028,0,0,0,1,65
99,7,14405,"BEILENSON, Anthony Charles",CA,71,23,100,-2.728319487,-0.44,0,0,0,0,53
99,7,14407,"BONIOR, David Edward",MI,23,12,100,-3.404739826,-0.547,0,0,0,1,66
99,7,14410,"COLEMAN, Earl Thomas",MO,34,6,200,1.527629774,0.262,0,0,0,0,61
99,7,14413,"DICKS, Norman DeValois",WA,73,6,100,-1.049742007,-0.312,0,0,0,0,57
99,7,14414,"DORNAN, Robert Kenneth",CA,71,38,200,2.4260645,0.49,0,1,0,1,69
99,7,14415,"EDWARDS, Marvin Henry (Mickey)",OK,53,5,200,1.442504802,0.394,0,0,0,0,76
99,7,14419,"FLIPPO, Ronnie Gene",AL,41,5,100,0.362474477,-0.175,0,0,0,0,59
99,7,14421,"GEPHARDT, Richard Andrew",MO,34,3,100,-1.499020965,-0.416,0,0,0,1,65
99,7,14422,"GLICKMAN, Daniel Robert",KS,32,4,100,-1.147706263,-0.133,0,0,0,0,63
99,7,14425,"HEFTEL, Cecil Landau",HI,82,1,100,-0.695438467,-0.269,0,0,0,1,55
99,7,14425,"HEFTEL, Cecil Landau",HI,82,1,100,-0.695438467,-0.269,0,0,0,1,55
99,7,14427,"HUCKABY, Thomas Jerald",LA,45,5,100,0.01779807,-0.009,0,0,0,0,66
99,7,14428,"IRELAND, Andrew Poysell (Andy)",FL,43,10,200,1.992355268,0.42,0,0,0,0,71
99,7,14429,"JENKINS, Edgar Lanier (Ed)",GA,44,9,100,0.182746186,-0.116,0,0,0,1,69
99,7,14430,"KILDEE, Dale Edward",MI,23,7,100,-3.250382221,-0.385,0,0,0,0,54
99,7,14431,"KOSTMAYER, Peter Houston",PA,14,8,100,-2.865798926,-0.298,0,1,0,0,64
99,7,14432,"LEACH, James Albert Smith",IA,31,1,200,-1.471803658,0.141,0,1,0,0,52
99,7,14435,"MARKEY, Edward John",MA,3,7,100,-4.221457686,-0.5,0,0,0,1,50
99,7,14437,"MARLENEE, Ronald Charles",MT,64,2,200,2.455351158,0.393,0,0,0,0,63
99,7,14440,"MIKULSKI, Barbara Ann",MD,52,3,100,-2.213694622,-0.37,0,0,1,0,50
99,7,14441,"MURPHY, Austin John",PA,14,22,100,-0.874596169,-0.081,0,0,0,1,43
99,7,14443,"OAKAR, Mary Rose",OH,24,20,100,-2.865241786,-0.4,0,0,1,0,48
99,7,14444,"PANETTA, Leon Edward",CA,71,16,100,-2.558527336,-0.258,0,0,0,1,53
99,7,14445,"PEASE, Donald James",OH,24,13,100,-2.089476217,-0.308,0,0,0,1,58
99,7,14446,"PURSELL, Carl Duane",MI,23,2,200,0.149373493,0.12,0,0,0,1,64
99,7,14448,"RAHALL, Nick Joe, II",WV,56,4,100,-1.986199952,-0.306,0,0,0,0,49
99,7,14449,"RUDD, Eldon Dean",AZ,61,4,200,2.774065789,0.422,0,0,0,1,71
99,7,14451,"SKELTON, Isaac Newton, IV (Ike)",MO,34,4,100,0.370545084,-0.172,1,0,0,0,67
99,7,14454,"STUMP, Robert Lee",AZ,61,3,200,3.944524461,0.703,1,0,0,1,71
99,7,14458,"VENTO, Bruce Frank",MN,33,4,100,-2.862494037,-0.472,0,0,0,0,40
99,7,14459,"VOLKMER, Harold Lee",MO,34,9,100,-0.942153497,-0.196,0,0,0,1,64
99,7,14460,"WALGREN, Douglas",PA,14,18,100,-2.146057036,-0.247,0,0,0,0,58
99,7,14461,"WALKER, Robert Smith",PA,14,16,200,2.190888149,0.581,0,0,0,1,74
99,7,14462,"WATKINS, Wesley Wade",OK,53,3,100,-0.421131115,-0.126,0,0,0,1,62
99,7,14463,"WEISS, Theodore S.",NY,13,17,100,-4.473817025,-0.564,0,1,0,1,25
99,7,14464,"WHITLEY, Charles Orville",NC,47,3,100,-0.439456686,-0.175,0,0,0,1,61
99,7,14465,"YOUNG, Robert Anton, III",MO,34,2,100,-1.162009126,-0.3,0,0,0,1,66
99,7,14466,"STANGELAND, Arlan Ingehart",MN,33,7,200,1.537072389,0.346,0,0,0,0,57
99,7,14467,"FOWLER, Wyche, Jr.",GA,44,5,100,-0.988935746,-0.237,0,0,0,1,67
99,7,14469,"LIVINGSTON, Robert Linlithgow, Jr.",LA,45,1,200,2.118889614,0.326,0,0,0,1,77
99,7,14470,"GARCIA, Robert",NY,13,18,100,-4.083957731,-0.559,0,1,0,1,19
99,7,14470,"GARCIA, Robert",NY,13,18,100,-4.083957731,-0.559,0,1,0,1,19
99,7,14470,"GARCIA, Robert",NY,13,18,100,-4.083957731,-0.559,0,1,0,1,19
99,7,14470,"GARCIA, Robert",NY,13,18,100,-4.083957731,-0.559,0,1,0,1,19
99,7,14471,"GREEN, Sedgwick William (Bill)",NY,13,15,200,-0.972648396,-0.044,0,0,0,1,39
99,7,14601,"ANTHONY, Beryl Franklin, Jr.",AR,42,4,100,-1.061783381,-0.254,0,0,0,0,56
99,7,14604,"BARNES, Michael Darr",MD,52,8,100,-2.658162342,-0.343,0,1,0,0,48
99,7,14605,"BEREUTER, Douglas Kent",NE,35,1,200,0.764463512,0.231,0,1,0,1,67
99,7,14607,"BONER, William Hill",TN,54,5,100,-0.495239291,-0.228,0,0,0,0,52
99,7,14608,"BYRON, Beverly Barton Butcher",MD,52,6,100,0.519442704,-0.024,1,0,1,0,69
99,7,14609,"CAMPBELL, Carroll Ashmore, Jr.",SC,48,4,200,1.914267205,0.306,0,0,0,0,70
99,7,14610,"CARNEY, William",NY,13,1,200,1.746755698,0.326,1,0,0,1,66
99,7,14611,"CHENEY, Richard Bruce",WY,68,1,200,3.469660164,0.523,0,0,0,0,71
99,7,14612,"CLINGER, William Floyd, Jr.",PA,14,23,200,0.354791933,0.176,0,0,0,1,63
99,7,14613,"COELHO, Tony",CA,71,15,100,-2.045979003,-0.413,0,0,0,0,59
99,7,14614,"COURTER, James Andrew",NJ,12,12,200,1.627861729,0.269,1,0,0,0,65
99,7,14616,"DANNEMEYER, William Edwin",CA,71,39,200,3.465456881,0.691,0,0,0,1,77
99,7,14617,"DASCHLE, Thomas Andrew",SD,37,1,100,-1.717641806,-0.303,0,0,0,1,63
99,7,14618,"DAVIS, Robert William",MI,23,11,200,0.704178551,0.098,1,0,0,0,59
99,7,14620,"DIXON, Julian Carey",CA,71,28,100,-2.79536161,-0.458,0,0,0,1,32
99,7,14621,"DONNELLY, Brian Joseph",MA,3,11,100,-1.390359907,-0.291,0,0,0,0,52
99,7,14624,"FAZIO, Victor Herbert, Jr.",CA,71,4,100,-1.681176832,-0.455,0,0,0,0,56
99,7,14626,"FROST, Jonas Martin",TX,49,24,100,-0.939373851,-0.316,0,0,0,1,53
99,7,14627,"GINGRICH, Newton Leroy",GA,44,6,200,1.926093859,0.377,0,0,0,0,69
99,7,14629,"GRAY, William Herbert, III",PA,14,2,100,-3.788507298,-0.511,0,0,0,0,10
99,7,14631,"GUARINI, Frank Joseph, Jr.",NJ,12,14,100,-1.602026492,-0.295,0,0,0,1,53
99,7,14632,"HALL, Tony Patrick",OH,24,3,100,-1.872498089,-0.28,0,0,0,0,56
99,7,14635,"HOPKINS, Larry Jones",KY,51,6,200,0.998966515,0.347,1,0,0,1,62
99,7,14636,"HUTTO, Earl Dewitt",FL,43,1,100,1.245717291,-0.007,1,0,0,1,76
99,7,14639,"KRAMER, Kenneth Bentley",CO,62,5,200,1.79956047,0.43,1,0,0,1,75
99,7,14641,"LEATH, James Marvin",TX,49,11,100,0.542775535,0.049,1,0,0,1,66
99,7,14643,"LELAND, George Thomas (Mickey)",TX,49,18,100,-3.874267227,-0.596,0,0,0,0,28
99,7,14644,"LEWIS, Charles Jeremy (Jerry)",CA,71,35,200,1.746651145,0.348,0,0,0,0,71
99,7,14645,"LOEFFLER, Thomas Gilbert",TX,49,21,200,2.610962066,0.425,0,0,0,0,78
99,7,14646,"LOWRY, Michael Edward",WA,73,7,100,-3.45071747,-0.401,0,0,0,0,41
99,7,14647,"LUNGREN, Daniel Edward",CA,71,42,200,2.126214444,0.497,0,0,0,0,72
99,7,14648,"MICA, Daniel Andrew",FL,43,14,100,-0.432121834,-0.184,0,1,0,0,61
99,7,14649,"MATSUI, Robert T.",CA,71,3,100,-2.855329671,-0.404,0,0,0,0,55
99,7,14650,"MAVROULES, Nicholas James",MA,3,6,100,-2.0942881,-0.342,1,0,0,0,55
99,7,14651,"NELSON, Clarence William (Bill)",FL,43,11,100,0.468038273,-0.192,0,0,0,1,74
99,7,14652,"PASHAYAN, Charles, Jr.",CA,71,17,200,1.321697275,0.282,0,0,0,1,63
99,7,14654,"RITTER, Donald Lawrence",PA,14,15,200,1.66607431,0.268,0,0,0,0,42
99,7,14655,"ROTH, Toby A.",WI,25,8,200,1.589106046,0.351,0,1,0,1,63
99,7,14656,"SABO, Martin Olav",MN,33,5,100,-3.361870193,-0.516,0,0,0,0,38
99,7,14657,"SENSENBRENNER, Frank James, Jr.",WI,25,9,200,0.95981365,0.646,0,0,0,0,65
99,7,14659,"SHELBY, Richard C.",AL,41,7,100,0.82548417,0.013,0,0,0,0,59
99,7,14660,"SHUMWAY, Norman David",CA,71,14,200,3.106620864,0.556,0,0,0,0,64
99,7,14661,"SNOWE, Olympia Jean",ME,2,2,200,-0.383219803,0.091,0,1,1,0,62
99,7,14662,"SOLOMON, Gerald Brooks Hunt",NY,13,24,200,3.010867301,0.492,0,1,0,1,69
99,7,14664,"STENHOLM, Charles Walter",TX,49,17,100,1.441155055,0.019,0,0,0,0,68
99,7,14666,"SWIFT, Allan Byron",WA,73,2,100,-2.435275896,-0.43,0,0,0,0,55
99,7,14667,"SYNAR, Michael Lynn",OK,53,2,100,-2.199058746,-0.321,0,0,0,0,64
99,7,14668,"TAUKE, Thomas Joseph",IA,31,2,200,-0.011901974,0.27,0,0,0,0,53
99,7,14669,"THOMAS, William Marshall",CA,71,20,200,1.449160718,0.371,0,0,0,0,69
99,7,14670,"WHITTAKER, Robert Russell",KS,32,5,200,1.276501824,0.346,0,0,0,0,67
99,7,14672,"WILLIAMS, John Patrick",MT,64,1,100,-2.63273736,-0.315,0,0,0,1,58
99,7,14673,"WOLPE, Howard Eliot, III",MI,23,3,100,-2.939135415,-0.374,0,1,0,0,63
99,7,14675,"PETRI, Thomas Evert",WI,25,6,200,0.829638061,0.379,0,0,0,0,62
99,7,14677,"PORTER, John Edward",IL,21,10,200,0.74599369,0.217,0,0,0,1,68
99,7,14679,"TAUZIN, Wilbert Joseph (Billy)",LA,45,3,100,0.562404133,0.03,0,0,0,0,65
99,7,14681,"CROCKETT, George William, Jr.",MI,23,13,100,-2.79523416,-0.651,0,1,0,0,15
99,7,14802,"BLILEY, Thomas Jerome, Jr.",VA,40,3,200,1.279095336,0.382,0,0,0,1,65
99,7,14803,"BROWN, George Hanks (Hank)",CO,62,4,200,0.943986198,0.511,0,0,0,1,68
99,7,14805,"CHAPPIE, Eugene A.",CA,71,2,200,2.437022201,0.414,0,0,0,1,63
99,7,14806,"COATS, Daniel Ray",IN,22,4,200,1.247344763,0.375,0,0,0,1,67
99,7,14808,"COYNE, William Joseph",PA,14,14,100,-3.097072173,-0.494,0,0,0,1,30
99,7,14809,"CRAIG, Larry Edwin",ID,63,1,200,2.58265979,0.494,0,0,0,0,68
99,7,14810,"DAUB, Harold John, Jr., (Hal)",NE,35,2,200,1.761791994,0.391,0,0,0,1,67
99,7,14812,"DORGAN, Byron Leslie",ND,36,1,100,-1.818810405,-0.267,0,0,0,0,65
99,7,14813,"DREIER, David Timothy",CA,71,33,200,2.985212441,0.478,0,0,0,0,70
99,7,14815,"DWYER, Bernard James",NJ,12,6,100,-2.000489386,-0.373,0,0,0,1,59
99,7,14816,"DYMALLY, Mervyn Malcolm",CA,71,31,100,-3.694525463,-0.685,0,1,0,0,41
99,7,14816,"DYMALLY, Mervyn Malcolm",CA,71,31,100,-3.694525463,-0.685,0,1,0,0,41
99,7,14816,"DYMALLY, Mervyn Malcolm",CA,71,31,100,-3.694525463,-0.685,0,1,0,0,41
99,7,14816,"DYMALLY, Mervyn Malcolm",CA,71,31,100,-3.694525463,-0.685,0,1,0,0,41
99,7,14817,"DYSON, Royden Patrick",MD,52,1,100,0.613001728,-0.104,1,0,0,0,65
99,7,14818,"ECKART, Dennis Edward",OH,24,11,100,-1.679163941,-0.242,0,0,0,0,59
99,7,14818,"ECKART, Dennis Edward",OH,24,11,100,-1.679163941,-0.242,0,0,0,0,59
99,7,14818,"ECKART, Dennis Edward",OH,24,11,100,-1.679163941,-0.242,0,0,0,0,59
99,7,14818,"ECKART, Dennis Edward",OH,24,11,100,-1.679163941,-0.242,0,0,0,0,59
99,7,14819,"EMERSON, Norvell William (Bill)",MO,34,8,200,2.210659248,0.332,0,0,0,1,61
99,7,14820,"EVANS, Thomas Cooper",IA,31,3,200,0.152760634,0.247,0,0,0,1,52
99,7,14821,"FIEDLER, Bobbi",CA,71,21,200,1.976699814,0.343,0,0,1,0,72
99,7,14822,"FIELDS, Jack Milton, Jr.",TX,49,8,200,3.638177508,0.541,0,0,0,0,60
99,7,14823,"FOGLIETTA, Thomas Michael",PA,14,1,100,-2.720577037,-0.506,1,0,0,0,65
99,7,14824,"FRANK, Barney",MA,3,4,100,-3.854008854,-0.499,0,0,0,0,48
99,7,14825,"GEJDENSON, Samuel",CT,1,2,100,-2.598726932,-0.416,0,1,0,0,61
99,7,14826,"GREGG, Judd Alan",NH,4,2,200,1.188623026,0.429,0,0,0,0,68
99,7,14827,"GUNDERSON, Steven Craig",WI,25,3,200,0.298179337,0.203,0,0,0,0,55
99,7,14828,"HALL, Ralph Moody",TX,49,4,100,1.686471184,0.096,0,0,0,1,69
99,7,14829,"HANSEN, James Vear",UT,67,1,200,3.88448661,0.496,1,0,0,1,78
99,7,14830,"HARTNETT, Thomas Forbes",SC,48,1,200,3.174797883,0.503,1,0,0,1,64
99,7,14831,"HATCHER, Charles Floyd",GA,44,2,100,0.080408432,-0.202,0,0,0,1,59
99,7,14832,"HENDON, William Martin",NC,47,11,200,1.903018602,0.335,0,0,0,0,63
99,7,14833,"HERTEL, Dennis Mark",MI,23,14,100,-1.89772272,-0.345,1,0,0,0,63
99,7,14834,"HILER, John Patrick",IN,22,3,200,1.946562598,0.413,0,0,0,0,62
99,7,14835,"HUNTER, Duncan Lee",CA,71,45,200,2.645257023,0.47,1,0,0,1,71
99,7,14837,"LANTOS, Thomas Peter",CA,71,11,100,-1.731138308,-0.376,0,1,0,0,50
99,7,14839,"LOWERY, William David",CA,71,41,200,1.712533005,0.33,0,0,0,0,64
99,7,14840,"MARTIN, David O'Brien",NY,13,26,200,1.237835152,0.232,1,0,0,1,65
99,7,14841,"MARTIN, Lynn Morley",IL,21,16,200,1.117401517,0.345,1,0,1,0,63
99,7,14842,"McCOLLUM, Ira William, Jr. (Bill)",FL,43,5,200,2.396947578,0.377,0,0,0,1,71
99,7,14843,"McCURDY, David Keith",OK,53,4,100,-0.462703746,-0.112,1,0,0,0,69
99,7,14844,"McEWEN, Bob",OH,24,6,200,2.132513063,0.359,0,0,0,0,68
99,7,14845,"McGRATH, Raymond Joseph",NY,13,5,200,0.856404134,0.185,0,0,0,0,60
99,7,14846,"MOLINARI, Guy Victor",NY,13,14,200,1.20673203,0.255,0,0,0,1,34
99,7,14847,"MORRISON, Sidney Wallace",WA,73,4,200,1.059694051,0.153,0,0,0,1,63
99,7,14852,"ROBERTS, Charles Patrick (Pat)",KS,32,1,200,1.052090636,0.415,0,0,0,1,74
99,7,14853,"ROEMER, Charles Elson (Buddy), III",LA,45,4,100,0.411143083,0.178,0,0,0,0,65
99,7,14854,"ROGERS, Harold Dallas (Hal)",KY,51,5,200,1.915079182,0.331,0,0,0,1,69
99,7,14855,"ROUKEMA, Margaret Scafati",NJ,12,5,200,-0.093805611,0.162,0,0,1,0,71
99,7,14856,"SAVAGE, Gus",IL,21,2,100,-3.72686971,-0.671,0,0,0,1,16
99,7,14857,"SCHNEIDER, Claudine",RI,5,2,200,-1.13590719,-0.026,0,0,1,0,53
99,7,14858,"SCHUMER, Charles Ellis (Chuck)",NY,13,10,100,-2.48299821,-0.35,0,0,0,0,49
99,7,14860,"SHAW, Eugene Clay, Jr.",FL,43,15,200,2.140731587,0.3,0,0,0,0,59
99,7,14861,"SKEEN, Joseph Richard",NM,66,2,200,2.125662601,0.301,0,0,0,1,66
99,7,14863,"SMITH, Christopher Henry",NJ,12,4,200,-0.005037547,0.158,0,1,0,0,59
99,7,14864,"SMITH, Dennis Alan (Denny)",OR,72,5,200,2.578695969,0.603,0,0,0,1,59
99,7,14868,"WEBER, John Vincent (Vin)",MN,33,2,200,1.242831979,0.381,0,0,0,0,57
99,7,14869,"WOLF, Frank Rudolph",VA,40,10,200,1.539327056,0.284,0,0,0,1,59
99,7,14870,"WORTLEY, George Cornelius",NY,13,27,200,1.212674825,0.207,0,0,0,1,60
99,7,14871,"WYDEN, Ronald Lee",OR,72,3,100,-1.731361059,-0.314,0,0,0,0,47
99,7,14872,"SILJANDER, Mark Deli",MI,23,4,200,2.848767116,0.406,0,1,0,0,69
99,7,14873,"HOYER, Steny Hamilton",MD,52,5,100,-1.759862476,-0.379,0,0,0,0,42
99,7,14874,"DOWDY, Charles Wayne",MS,46,4,100,-0.196072828,-0.259,0,0,0,0,59
99,7,14875,"OXLEY, Michael Garver",OH,24,4,200,2.094206497,0.382,0,0,0,0,74
99,7,14877,"KENNELLY, Barbara Bailey",CT,1,1,100,-2.018378445,-0.346,0,0,1,0,53
99,7,14879,"MART̍NEZ, Matthew G.",CA,71,30,100,-2.047540157,-0.341,0,0,0,1,55
99,7,15000,"ACKERMAN, Gary Leonard",NY,13,7,100,-3.226083087,-0.429,0,0,0,0,46
99,7,15001,"ANDREWS, Michael Allen",TX,49,25,100,-0.382528479,-0.135,0,0,0,0,53
99,7,15002,"BARTLETT, Harry Stephen (Steve)",TX,49,3,200,2.708312913,0.46,1,0,0,0,82
99,7,15003,"BATEMAN, Herbert Harvell",VA,40,1,200,1.638657324,0.242,0,0,0,1,62
99,7,15004,"BATES, Jim",CA,71,44,100,-2.314890039,-0.279,0,1,0,1,52
99,7,15005,"BERMAN, Howard Lawrence",CA,71,26,100,-3.416692289,-0.404,0,0,0,0,54
99,7,15006,"BILIRAKIS, Michael",FL,43,9,200,2.165546721,0.382,0,0,0,1,67
99,7,15007,"BOEHLERT, Sherwood Louis",NY,13,25,200,-0.376582606,0.103,0,0,0,1,37
99,7,15008,"BORSKI, Robert Anthony, Jr.",PA,14,3,100,-1.884997525,-0.416,0,0,0,0,54
99,7,15009,"BOSCO, Douglas Harry",CA,71,1,100,-1.740547021,-0.271,0,0,0,0,52
99,7,15010,"BOUCHER, Frederick C.",VA,40,9,100,-1.771465914,-0.265,0,0,0,0,58
99,7,15011,"BOXER, Barbara",CA,71,6,100,-3.572386619,-0.45,0,0,1,0,42
99,7,15013,"BRYANT, John Wiley",TX,49,5,100,-1.478525785,-0.358,0,1,0,0,59
99,7,15014,"BURTON, Danny Lee",IN,22,6,200,4.047492802,0.585,0,0,0,1,72
99,7,15015,"CARPER, Thomas Richard",DE,11,1,100,-1.039811098,-0.174,0,0,0,1,60
99,7,15016,"CHANDLER, Rodney Dennis",WA,73,8,200,0.68985385,0.254,0,0,0,0,62
99,7,15018,"COLEMAN, Ronald D'Emory",TX,49,16,100,-0.857488578,-0.402,0,0,0,1,57
99,7,15019,"COOPER, James Hayes Shofner",TN,54,4,100,-0.996279576,-0.162,0,1,0,0,57
99,7,15020,"DeWINE, Michael",OH,24,7,200,2.01908321,0.289,0,0,0,0,68
99,7,15021,"DURBIN, Richard Joseph",IL,21,20,100,-2.316232632,-0.365,0,0,0,0,58
99,7,15022,"ERDREICH, Ben",AL,41,6,100,0.223211976,-0.06,0,0,0,1,59
99,7,15023,"EVANS, Lane Allen",IL,21,17,100,-3.167591345,-0.454,0,1,0,1,54
99,7,15024,"FEIGHAN, Edward Farrell",OH,24,19,100,-2.215819511,-0.304,0,0,0,0,59
99,7,15025,"FRANKLIN, William Webster",MS,46,2,200,1.719468077,0.303,0,0,0,1,50
99,7,15026,"GEKAS, George William",PA,14,17,200,1.751397624,0.426,0,0,0,1,66
99,7,15028,"JOHNSON, Nancy Lee",CT,1,6,200,0.047519365,0.122,0,0,1,0,63
99,7,15029,"KAPTUR, Marcia Carolyn (Marcy)",OH,24,9,100,-1.780943506,-0.349,1,0,1,0,51
99,7,15030,"KASICH, John Richard",OH,24,12,200,1.52746948,0.314,0,0,0,0,65
99,7,15031,"KOLTER, Joseph Paul",PA,14,4,100,-1.116718467,-0.28,0,0,0,1,48
99,7,15032,"LEHMAN, Richard Henry",CA,71,18,100,-2.418846144,-0.27,0,0,0,0,51
99,7,15033,"LEVIN, Sander Martin",MI,23,17,100,-2.325152972,-0.377,0,1,0,0,54
99,7,15034,"LEVINE, Meldon Edises",CA,71,27,100,-2.988944207,-0.436,0,0,0,0,52
99,7,15035,"LEWIS, Thomas F.",FL,43,12,200,1.562563431,0.387,0,0,0,1,67
99,7,15036,"LIPINSKI, William Oliver",IL,21,5,100,-0.065372712,-0.176,0,1,0,1,58
99,7,15037,"MACK, Connie, III",FL,43,13,200,2.864087212,0.466,0,1,0,0,74
99,7,15038,"MacKAY, Kenneth Hood, Jr. (Buddy)",FL,43,6,100,-1.188101607,-0.13,0,1,0,1,64
99,7,15039,"McCAIN, John Sidney, III",AZ,61,1,200,1.546409495,0.381,0,0,0,1,72
99,7,15040,"McCANDLESS, Alfred A.",CA,71,37,200,2.516501366,0.474,1,0,0,1,65
99,7,15041,"McCLOSKEY, Francis Xavier",IN,22,8,100,-1.503554322,-0.336,0,0,0,1,60
99,7,15042,"McKERNAN, John Rettie, Jr.",ME,2,1,200,-0.193086749,0.137,0,0,0,0,60
99,7,15044,"MOODY, Jim",WI,25,5,100,-2.968320448,-0.347,0,0,0,0,40
99,7,15045,"MORRISON, Bruce Andrew",CT,1,3,100,-3.553066816,-0.396,0,0,0,0,59
99,7,15046,"MRAZEK, Robert Jan",NY,13,3,100,-2.164972711,-0.349,0,0,0,1,64
99,7,15047,"NIELSON, Howard Curtis",UT,67,3,200,2.406027677,0.505,0,0,0,1,77
99,7,15048,"OLIN, James R.",VA,40,6,100,-1.039459399,-0.119,0,0,0,1,66
99,7,15049,"ORTIZ, Solomon P.",TX,49,27,100,-0.314432024,-0.272,1,0,0,1,53
99,7,15050,"OWENS, Major Robert Odell",NY,13,12,100,-3.809861251,-0.569,0,0,0,0,14
99,7,15051,"PACKARD, Ronald C.",CA,71,43,200,2.203496509,0.419,0,0,0,1,74
99,7,15052,"PENNY, Timothy Joseph",MN,33,1,100,-1.870953002,-0.051,0,0,0,0,55
99,7,15052,"PENNY, Timothy Joseph",MN,33,1,100,-1.870953002,-0.051,0,0,0,0,55
99,7,15052,"PENNY, Timothy Joseph",MN,33,1,100,-1.870953002,-0.051,0,0,0,0,55
99,7,15052,"PENNY, Timothy Joseph",MN,33,1,100,-1.870953002,-0.051,0,0,0,0,55
99,7,15053,"RAY, Richard Belmont",GA,44,3,100,0.618623978,0.035,1,0,0,1,55
99,7,15054,"REID, Harry",NV,65,1,100,-0.75260892,-0.276,0,1,0,0,62
99,7,15055,"RICHARDSON, Bill",NM,66,3,100,-1.373395527,-0.321,0,0,0,0,53
99,7,15056,"RIDGE, Thomas Joseph",PA,14,21,200,-0.002871935,0.186,0,0,0,1,53
99,7,15057,"ROWLAND, James Roy, Jr.",GA,44,8,100,0.225228274,-0.127,0,0,0,1,52
99,7,15058,"SCHAEFER, Daniel",CO,62,6,200,2.096323513,0.479,0,0,0,1,69
99,7,15059,"SIKORSKI, Gerald Edward",MN,33,6,100,-2.349019113,-0.217,1,0,0,0,52
99,7,15060,"SISISKY, Norman",VA,40,4,100,0.029937089,-0.122,0,0,0,1,56
99,7,15061,"SLATTERY, James Charles",KS,32,2,100,-0.856367529,-0.099,0,0,0,0,64
99,7,15062,"SMITH, Lawrence Jack",FL,43,16,100,-0.984383726,-0.355,0,1,0,0,61
99,7,15063,"SMITH, Robert Freeman",OR,72,2,200,1.612416669,0.396,1,0,0,0,64
99,7,15064,"SPRATT, John McKee, Jr.",SC,48,5,100,-0.750554721,-0.256,0,0,0,1,62
99,7,15065,"STAGGERS, Harley Orrin, Jr.",WV,56,2,100,-1.683243979,-0.315,0,0,0,0,58
99,7,15066,"SUNDQUIST, Donald Kenneth",TN,54,7,200,2.418516638,0.371,0,0,0,1,66
99,7,15068,"TALLON, Robert Mooneyhan, Jr. (Robin)",SC,48,6,100,0.009195358,-0.1,0,0,0,0,57
99,7,15069,"THOMAS, Robert Lindsay",GA,44,1,100,0.271232167,-0.14,0,0,0,0,59
99,7,15070,"TORRES, Esteban Edward",CA,71,34,100,-2.781718821,-0.487,0,1,0,1,59
99,7,15071,"TORRICELLI, Robert Guy",NJ,12,9,100,-1.679926054,-0.262,0,0,0,0,59
99,7,15072,"TOWNS, Edolphus",NY,13,11,100,-3.943221087,-0.519,0,0,0,1,21
99,7,15073,"VALENTINE, Itimous Thaddeus, Jr., (Tim)",NC,47,2,100,-0.009086475,-0.084,0,0,0,1,53
99,7,15075,"VUCANOVICH, Barbara Farrell",NV,65,2,200,2.512828275,0.441,0,0,1,0,69
99,7,15076,"WHEAT, Alan Dupree",MO,34,5,100,-3.436725358,-0.465,0,0,0,0,46
99,7,15077,"WISE, Robert Ellsworth, Jr.",WV,56,3,100,-1.808818132,-0.32,0,1,0,0,56
99,7,15078,"ZSCHAU, Edwin Van Wyck",CA,71,12,200,0.43772149,0.345,0,1,0,0,57
99,7,15079,"HAYES, Charles Arthur",IL,21,1,100,-4.129349662,-0.656,0,0,0,0,5
99,7,15080,"BURTON, Sala Galante",CA,71,5,100,-3.647444458,-0.585,1,0,1,0,33
99,7,15081,"DARDEN, George (Buddy)",GA,44,7,100,0.589892421,-0.161,0,0,0,0,73
99,7,15082,"KLECZKA, Gerald Daniel",WI,25,4,100,-1.639989857,-0.322,0,0,0,1,48
99,7,15083,"MOLLOHAN, Alan Bowlby",WV,56,1,100,-0.248966509,-0.292,0,0,0,1,57
99,7,15083,"MOLLOHAN, Alan Bowlby",WV,56,1,100,-0.248966509,-0.292,0,0,0,1,57
99,7,15084,"ATKINS, Chester Greenough",MA,3,5,100,-2.554169342,-0.407,0,0,0,0,57
99,7,15084,"ATKINS, Chester Greenough",MA,3,5,100,-2.554169342,-0.407,0,0,0,0,57
99,7,15084,"ATKINS, Chester Greenough",MA,3,5,100,-2.554169342,-0.407,0,0,0,0,57
99,7,15084,"ATKINS, Chester Greenough",MA,3,5,100,-2.554169342,-0.407,0,0,0,0,57
99,7,15085,"BARTON, Joe Linus",TX,49,6,200,3.975872691,0.528,0,0,0,0,70
99,7,15086,"BENTLEY, Helen Delich",MD,52,2,200,1.531668471,0.276,0,0,1,0,66
99,7,15087,"BOULTER, Eldon Beau",TX,49,13,200,2.727177552,0.483,0,0,0,0,72
99,7,15088,"BRUCE, Terry Lee",IL,21,19,100,-2.360772309,-0.268,0,0,0,0,62
99,7,15088,"BRUCE, Terry Lee",IL,21,19,100,-2.360772309,-0.268,0,0,0,0,62
99,7,15088,"BRUCE, Terry Lee",IL,21,19,100,-2.360772309,-0.268,0,0,0,0,62
99,7,15088,"BRUCE, Terry Lee",IL,21,19,100,-2.360772309,-0.268,0,0,0,0,62
99,7,15089,"BUSTAMANTE, Albert G.",TX,49,23,100,-0.707673347,-0.392,1,0,0,1,59
99,7,15090,"CALLAHAN, Herbert Leon (Sonny)",AL,41,1,200,2.198347762,0.373,0,0,0,1,64
99,7,15091,"COBEY, William Wilfred, Jr.",NC,47,4,200,2.554587956,0.468,0,0,0,0,60
99,7,15092,"COBLE, Howard",NC,47,6,200,1.881346744,0.52,0,0,0,1,65
99,7,15093,"COMBEST, Larry Ed",TX,49,19,200,3.046356689,0.458,0,0,0,0,75
99,7,15094,"DeLAY, Thomas Dale",TX,49,22,200,3.874486607,0.593,0,0,0,0,70
99,7,15095,"DioGUARDI, Joseph J.",NY,13,20,200,0.450233314,0.218,0,0,0,0,56
99,7,15097,"ECKERT, Fred J.",NY,13,30,200,2.731395942,0.409,0,0,0,0,63
99,7,15098,"FAWELL, Harris W.",IL,21,13,200,0.990561666,0.332,0,0,0,0,54
99,7,15099,"GALLO, Dean Anderson",NJ,12,11,200,1.174554105,0.203,0,0,0,0,69
99,7,15100,"GORDON, Barton Jennings",TN,54,6,100,-0.960010167,-0.204,0,0,0,1,59
99,7,15101,"GRAY, Kenneth James",IL,21,22,100,-1.15564867,-0.438,0,0,0,1,56
99,7,15102,"GROTBERG, John",IL,21,14,200,2.528776558,0.416,0,0,0,0,69
99,7,15103,"HENRY, Paul B.",MI,23,5,200,-0.040470086,0.264,0,0,0,0,68
99,7,15104,"KANJORSKI, Paul E.",PA,14,11,100,-0.880162064,-0.303,0,0,0,1,55
99,7,15105,"KOLBE, James Thomas",AZ,61,5,200,1.241569515,0.351,0,0,0,1,62
99,7,15106,"LIGHTFOOT, James Ross",IA,31,5,200,0.759581079,0.391,0,0,0,1,57
99,7,15107,"MANTON, Thomas J.",NY,13,9,100,-1.954846825,-0.361,0,0,0,1,57
99,7,15108,"McMILLAN, John Alexander, III (Alex)",NC,47,9,200,1.637384476,0.294,0,0,0,1,64
99,7,15109,"MEYERS, Jan",KS,32,3,200,0.529763869,0.208,0,0,1,0,63
99,7,15110,"MILLER, John Ripin",WA,73,1,200,0.398346845,0.168,0,0,0,0,57
99,7,15111,"MONSON, David Smith",UT,67,2,200,2.155331744,0.588,0,0,0,0,68
99,7,15112,"SAXTON, Hugh James",NJ,12,13,200,0.91859557,0.238,0,0,0,0,65
99,7,15114,"SCHUETTE, Bill",MI,23,10,200,1.523507293,0.28,0,0,0,0,67
99,7,15115,"SLAUGHTER, Daniel French, Jr.",VA,40,7,200,2.40158424,0.38,0,0,0,1,68
99,7,15116,"SMITH, Robert C.",NH,4,1,200,2.763267921,0.623,0,0,0,1,70
99,7,15117,"STALLINGS, Richard Howard",ID,63,2,100,-0.660975069,-0.084,0,0,0,0,76
99,7,15118,"STRANG, Michael Lathrop",CO,62,3,200,2.361184562,0.465,0,0,0,1,63
99,7,15119,"SWEENEY, David McCann (Mac)",TX,49,14,200,2.228664885,0.367,1,0,0,0,67
99,7,15120,"SWINDALL, Patrick Lynn",GA,44,4,200,2.905634619,0.513,0,0,0,0,66
99,7,15121,"TRAFICANT, James A., Jr.",OH,24,17,100,-2.120526261,-0.082,0,0,0,0,42
99,7,15122,"ROBINSON, Tommy Franklin",AR,42,2,100,0.433282685,-0.013,1,0,0,1,60
99,7,15123,"ROWLAND, John",CT,1,5,200,0.940261828,0.169,0,0,0,0,67
99,7,15124,"VISCLOSKY, Peter",IN,22,1,100,-2.010291701,-0.402,0,0,0,0,43
99,7,15125,"ARMEY, Richard Keith",TX,49,26,200,3.810131273,0.635,0,0,0,0,76
99,7,15129,"CHAPMAN, Jim",TX,49,1,100,-0.396963232,-0.198,0,0,0,0,61
99,7,15129,"CHAPMAN, Jim",TX,49,1,100,-0.396963232,-0.198,0,0,0,0,61
99,7,15228,"PERKINS, Carl Christopher",KY,51,7,100,-1.864380346,-0.56,0,0,0,0,49
99,7,15244,"WALDON, Alton R., Jr.",NY,13,6,100,-2.920308481,-0.501,0,0,0,1,33
99,7,15244,"WALDON, Alton R., Jr.",NY,13,6,100,-2.920308481,-0.501,0,0,0,1,33
99,7,15245,"ABERCROMBIE, Neil",HI,82,1,100,-2.257199039,-0.432,1,0,0,0,55
99,7,15245,"ABERCROMBIE, Neil",HI,82,1,100,-2.257199039,-0.432,1,0,0,0,55
100,8,633,"BENNETT, Charles Edward",FL,43,3,100,-0.776254047,-0.088,1,0,0,1,59
100,8,830,"BOLAND, Edward Patrick",MA,3,2,100,-1.819828292,-0.306,0,0,0,1,53
100,8,1077,"BROOKS, Jack Bascom",TX,49,9,100,-1.818481731,-0.407,0,0,0,1,52
100,8,1087,"BROOMFIELD, William S.",MI,23,18,200,1.825546278,0.227,0,1,0,0,75
100,8,2009,"CONTE, Silvio Ottavio",MA,3,1,200,-0.070009554,-0.023,0,0,0,1,51
100,8,2605,"DINGELL, John David, Jr.",MI,23,16,100,-2.455136238,-0.448,0,0,0,1,60
100,8,3078,"FASCELL, Dante Bruno",FL,43,19,100,-1.414745383,-0.4,0,1,0,1,65
100,8,5101,"KASTENMEIER, Robert William",WI,25,2,100,-2.817785614,-0.514,0,0,0,1,49
100,8,5495,"LATTA, Delbert Leroy",OH,24,5,200,2.930543532,0.391,0,0,0,0,67
100,8,6455,"MICHEL, Robert Henry",IL,21,18,200,2.418364934,0.372,0,0,0,1,62
100,8,6845,"NATCHER, William Huston",KY,51,2,100,-1.102010215,-0.288,0,0,0,1,63
100,8,7333,"PEPPER, Claude Denson",FL,43,18,100,-0.960099517,-0.422,0,0,0,0,60
100,8,7610,"PRICE, Charles Melvin",IL,21,21,100,-1.168588674,-0.429,1,0,0,1,53
100,8,7610,"PRICE, Charles Melvin",IL,21,21,100,-1.168588674,-0.429,1,0,0,1,53
100,8,8010,"RODINO, Peter Wallace, Jr.",NJ,12,10,100,-3.656964905,-0.435,0,0,0,1,25
100,8,8080,"ROSTENKOWSKI, Daniel David",IL,21,8,100,-1.844796053,-0.39,0,0,0,1,51
100,8,8672,"SMITH, Neal Edward",IA,31,4,100,-1.143381803,-0.313,0,0,0,1,49
100,8,9017,"STRATTON, Samuel Studdiford",NY,13,23,100,0.059639084,-0.139,1,0,0,1,53
100,8,10075,"WHITTEN, Jamie Lloyd",MS,46,1,100,-0.938953893,-0.161,0,0,0,0,63
100,8,10391,"WRIGHT, James Claude, Jr.",TX,49,12,100,-2.227569523,-0.383,0,0,0,1,58
100,8,10421,"YATES, Sidney Richard",IL,21,9,100,-3.815700018,-0.494,0,0,0,1,45
100,8,10520,"GONŹLEZ, Henry B.",TX,49,20,100,-2.888794703,-0.538,0,0,0,0,41
100,8,10561,"ST. GERMAIN, Fernand Joseph",RI,5,1,100,-2.311438352,-0.355,0,0,0,1,50
100,8,10566,"UDALL, Morris King",AZ,61,2,100,-2.05730472,-0.387,0,1,0,1,51
100,8,10573,"BROWN, George Edward, Jr.",CA,71,36,100,-2.939588032,-0.506,0,0,0,1,56
100,8,10583,"EDWARDS, William Donlon (Don)",CA,71,10,100,-3.84493625,-0.599,0,0,0,1,51
100,8,10588,"GIBBONS, Sam Melville",FL,43,7,100,-1.088626721,-0.233,0,0,0,1,63
100,8,10595,"HAWKINS, Augustus Freeman (Gus)",CA,71,29,100,-3.319221591,-0.517,0,0,0,0,22
100,8,10596,"HORTON, Frank Jefferson",NY,13,29,200,0.095081258,-0.004,0,0,0,1,61
100,8,10607,"McDADE, Joseph Michael",PA,14,10,200,0.733309664,0.093,0,0,0,0,61
100,8,10614,"PICKLE, James Jarrell (Jake)",TX,49,10,100,-0.73377817,-0.218,0,0,0,1,58
100,8,10616,"QUILLEN, James Henry",TN,54,1,200,1.58180061,0.246,0,0,0,1,71
100,8,10621,"ROYBAL, Edward R.",CA,71,25,100,-3.470127993,-0.61,0,0,0,1,39
100,8,10703,"ANNUNZIO, Frank",IL,21,11,100,-1.763004166,-0.398,0,0,0,0,59
100,8,10713,"CONYERS, John, Jr.",MI,23,1,100,-4.440127201,-0.658,0,0,0,1,14
100,8,10716,"de la GARZA, Eligio, II (Kika)",TX,49,15,100,-1.043829619,-0.255,0,0,0,1,46
100,8,10717,"DICKINSON, William Louis",AL,41,2,200,2.058422824,0.398,1,0,0,1,63
100,8,10719,"DUNCAN, John James",TN,54,2,200,1.468486598,0.194,0,0,0,1,64
100,8,10726,"FOLEY, Thomas Stephen",WA,73,5,100,-1.959933947,-0.354,0,0,0,0,60
100,8,10727,"FORD, William David",MI,23,15,100,-2.433936259,-0.516,0,0,0,1,61
100,8,10732,"HAMILTON, Lee Herbert",IN,22,9,100,-1.859660286,-0.171,0,1,0,0,60
100,8,10739,"HOWARD, James John",NJ,12,3,100,-3.171616852,-0.431,0,0,0,1,67
100,8,10742,"JACOBS, Andrew, Jr.",IN,22,10,100,-1.685687531,-0.07,0,0,0,1,48
100,8,10768,"SCHEUER, James Haas",NY,13,8,100,-2.660360256,-0.478,0,0,0,1,47
100,8,10788,"JONES, Walter Beaman, Sr.",NC,47,1,100,-1.506027295,-0.259,0,0,0,0,57
100,8,10794,"VANDER JAGT, Guy Adrian",MI,23,9,200,1.899601835,0.247,0,0,0,0,69
100,8,11000,"BEVILL, Tom",AL,41,4,100,-0.192234579,-0.213,0,0,0,1,59
100,8,11020,"HAMMERSCHMIDT, John Paul",AR,42,3,200,1.829299466,0.253,0,0,0,1,70
100,8,11028,"LUKENS, Donald Edgar",OH,24,8,200,2.154916765,0.459,0,1,0,1,73
100,8,11034,"MILLER, Clarence E.",OH,24,10,200,1.791453223,0.416,0,0,0,0,66
100,8,11035,"MONTGOMERY, Gillespie V. (Sonny)",MS,46,3,100,0.043522651,0.017,1,0,0,1,65
100,8,11036,"MYERS, John Thomas",IN,22,7,200,1.551952258,0.236,0,0,0,1,66
100,8,11037,"NICHOLS, William Flynt",AL,41,3,100,-0.003746269,-0.042,1,0,0,1,60
100,8,11058,"WYLIE, Chalmers Pangburn",OH,24,15,200,1.503273698,0.23,0,0,0,1,66
100,8,11067,"GAYDOS, Joseph Matthew",PA,14,20,100,-0.870346079,-0.278,0,0,0,1,37
100,8,12000,"ALEXANDER, William Vollie (Bill), Jr.",AR,42,1,100,-1.663987579,-0.41,0,0,0,1,57
100,8,12001,"ANDERSON, Glenn Malcolm",CA,71,32,100,-1.449537053,-0.269,0,0,0,1,58
100,8,12003,"BIAGGI, Mario",NY,13,19,100,-1.578433139,-0.339,0,0,0,0,52
100,8,12007,"CHAPPELL, William Venroe, Jr.",FL,43,4,100,-0.193753851,-0.098,0,0,0,1,67
100,8,12009,"CLAY, William Lacy, Sr.",MO,34,1,100,-3.666025381,-0.49,0,0,0,1,37
100,8,12010,"COUGHLIN, Robert Lawrence",PA,14,13,200,0.498635854,0.204,0,0,0,1,60
100,8,12011,"DANIEL, Wilbur Clarence (Dan)",VA,40,5,100,0.882198614,0.161,1,0,0,1,65
100,8,12011,"DANIEL, Wilbur Clarence (Dan)",VA,40,5,100,0.882198614,0.161,1,0,0,1,65
100,8,12013,"FISH, Hamilton, Jr.",NY,13,21,200,0.173097189,0.07,0,0,0,1,68
100,8,12022,"LUJ́N, Manuel, Jr.",NM,66,1,200,2.009310628,0.272,0,0,0,0,60
100,8,12030,"STOKES, Louis",OH,24,21,100,-4.385280977,-0.578,0,0,0,1,21
100,8,12035,"YATRON, Gus",PA,14,6,100,-1.228332106,-0.174,0,1,0,0,64
100,8,12036,"OBEY, David Ross",WI,25,7,100,-3.088429173,-0.45,0,0,0,0,53
100,8,12038,"JONES, Ed",TN,54,8,100,-0.918646816,-0.245,0,0,0,0,57
100,8,12041,"CRANE, Philip Miller",IL,21,12,200,4.432073881,0.739,0,0,0,1,77
100,8,12042,"ROE, Robert A.",NJ,12,8,100,-1.713344818,-0.326,0,0,0,1,58
100,8,13002,"ARCHER, William Reynolds, Jr.",TX,49,7,200,2.840276904,0.496,0,0,0,1,83
100,8,13003,"ASPIN, Leslie",WI,25,1,100,-1.390480811,-0.32,1,0,0,1,55
100,8,13011,"DELLUMS, Ronald V.",CA,71,8,100,-3.592783699,-0.644,1,0,0,1,34
100,8,13015,"FRENZEL, William Eldridge",MN,33,3,200,0.881801029,0.353,0,0,0,1,59
100,8,13020,"KEMP, Jack French",NY,13,31,200,2.574113841,0.3,0,0,0,1,62
100,8,13021,"LENT, Norman Frederick",NY,13,4,200,1.479214641,0.183,0,0,0,1,64
100,8,13024,"MAZZOLI, Romano Louis",KY,51,3,100,-0.865145114,-0.186,0,0,0,1,52
100,8,13029,"McKINNEY, Stewart Brett",CT,1,4,200,-0.806767834,-0.006,0,0,0,1,63
100,8,13029,"McKINNEY, Stewart Brett",CT,1,4,200,-0.806767834,-0.006,0,0,0,1,63
100,8,13035,"RANGEL, Charles B.",NY,13,16,100,-4.116338288,-0.514,0,0,0,1,16
100,8,13042,"SPENCE, Floyd Davidson",SC,48,2,200,1.961711232,0.32,1,0,0,1,62
100,8,13047,"YOUNG, Charles William (Bill)",FL,43,8,200,2.268952341,0.325,0,0,0,1,63
100,8,14015,"GILMAN, Benjamin Arthur",NY,13,22,200,0.416165389,0.043,0,1,0,1,61
100,8,14029,"LEHMAN, William",FL,43,17,100,-3.262002468,-0.483,0,0,0,0,46
100,8,14031,"LOTT, Chester Trent",MS,46,5,200,2.112361695,0.39,0,0,0,0,74
100,8,14033,"MADIGAN, Edward Rell",IL,21,15,200,2.0871538,0.247,0,0,0,0,68
100,8,14039,"MOAKLEY, John Joseph",MA,3,9,100,-2.920599586,-0.418,0,0,0,1,48
100,8,14040,"MOORHEAD, Carlos John",CA,71,22,200,3.018186976,0.465,0,0,0,1,72
100,8,14042,"OWENS, Douglas Wayne",UT,67,2,100,-1.982780062,-0.253,0,1,0,0,68
100,8,14043,"PARRIS, Stanford E.",VA,40,8,200,2.027839133,0.287,0,0,0,1,61
100,8,14045,"REGULA, Ralph Straus",OH,24,16,200,0.731215699,0.221,0,0,0,1,62
100,8,14046,"RINALDO, Matthew John",NJ,12,7,200,0.659156737,0.023,0,0,0,0,63
100,8,14048,"ROSE, Charles Grandison, III",NC,47,7,100,-1.523717038,-0.319,0,0,0,0,57
100,8,14051,"SCHROEDER, Patricia Scott",CO,62,1,100,-2.058820148,-0.225,1,0,1,0,47
100,8,14052,"SHUSTER, E. G. (Bud)",PA,14,9,200,1.973251876,0.416,0,0,0,1,66
100,8,14053,"STARK, Fortney Hillman (Pete), Jr.",CA,71,9,100,-3.640855792,-0.631,0,0,0,1,50
100,8,14055,"STUDDS, Gerry Eastman",MA,3,10,100,-4.11314049,-0.444,0,1,0,0,55
100,8,14057,"TAYLOR, Gene",MO,34,7,200,2.057823111,0.328,0,0,0,0,69
100,8,14062,"WILSON, Charles",TX,49,2,100,0.0049038,-0.196,0,0,0,1,58
100,8,14066,"YOUNG, Donald Edwin",AK,81,1,200,1.378757632,0.278,0,0,0,1,62
100,8,14067,"BOGGS, Corinne Claiborne (Lindy)",LA,45,2,100,-1.529406588,-0.359,0,0,1,0,37
100,8,14068,"COLLINS, Cardiss",IL,21,7,100,-3.791470574,-0.552,0,0,1,0,25
100,8,14070,"LUKEN, Thomas Andrew",OH,24,1,100,-1.39664995,-0.163,0,0,0,1,65
100,8,14071,"LAGOMARSINO, Robert John",CA,71,19,200,2.178255734,0.378,0,1,0,1,62
100,8,14072,"MURTHA, John Patrick, Jr.",PA,14,12,100,-0.418167154,-0.265,0,0,0,1,50
100,8,14075,"TRAXLER, Jerome Bob",MI,23,8,100,-2.39445232,-0.33,0,0,0,1,60
100,8,14201,"AuCOIN, Les",OR,72,1,100,-1.971267045,-0.231,0,0,0,1,57
100,8,14208,"BONKER, Don Leroy",WA,73,3,100,-2.260028561,-0.336,0,1,0,1,53
100,8,14210,"CARR, Milton Robert (Bob)",MI,23,6,100,-1.951633558,-0.254,0,0,0,0,63
100,8,14212,"DERRICK, Butler Carson, Jr.",SC,48,3,100,-1.058143272,-0.215,0,0,0,0,67
100,8,14214,"DOWNEY, Thomas Joseph",NY,13,2,100,-2.766057024,-0.384,0,0,0,0,66
100,8,14216,"EARLY, Joseph Daniel",MA,3,3,100,-2.137136919,-0.254,0,0,0,1,57
100,8,14219,"ENGLISH, Glenn Lee, Jr.",OK,53,6,100,-0.147527278,-0.027,0,0,0,0,69
100,8,14223,"FLORIO, James Joseph",NJ,12,1,100,-1.956195347,-0.318,0,0,0,1,55
100,8,14224,"FORD, Harold Eugene",TN,54,9,100,-3.300799515,-0.438,0,0,0,0,36
100,8,14225,"GRADISON, Willis David, Jr.",OH,24,2,200,0.947155166,0.233,0,0,0,0,64
100,8,14233,"HEFNER, Willie Gathrel (Bill)",NC,47,8,100,-0.782667564,-0.264,0,0,0,0,66
100,8,14237,"HUBBARD, Carroll, Jr.",KY,51,1,100,-0.190169814,-0.038,0,0,0,0,54
100,8,14238,"HUGHES, William John",NJ,12,2,100,-1.349183051,-0.153,0,0,0,0,62
100,8,14239,"HYDE, Henry John",IL,21,6,200,2.478576519,0.312,0,1,0,1,56
100,8,14240,"JEFFORDS, James Merrill",VT,6,1,200,-0.043219409,0.014,0,0,0,1,58
100,8,14248,"LaFALCE, John Joseph",NY,13,32,100,-1.552369154,-0.357,0,0,0,1,55
100,8,14251,"LLOYD, Marilyn Laird",TN,54,3,100,-0.213678053,-0.058,1,0,1,0,63
100,8,14253,"McHUGH, Matthew Francis",NY,13,28,100,-2.505117735,-0.353,0,0,0,0,61
100,8,14256,"MILLER, George",CA,71,7,100,-3.67117562,-0.552,0,0,0,0,52
100,8,14257,"MINETA, Norman Y.",CA,71,13,100,-2.817497798,-0.479,0,0,0,1,58
100,8,14262,"NEAL, Stephen Lybrook",NC,47,5,100,-1.281992337,-0.145,0,0,0,0,64
100,8,14264,"NOWAK, Henry James",NY,13,33,100,-2.169977776,-0.332,0,0,0,1,37
100,8,14265,"OBERSTAR, James Louis",MN,33,8,100,-3.341990418,-0.553,0,0,0,0,40
100,8,14271,"RUSSO, Martin Anthony",IL,21,3,100,-2.078055698,-0.192,0,0,0,0,65
100,8,14273,"SCHULZE, Richard Taylor",PA,14,5,200,1.251053395,0.271,0,0,0,1,66
100,8,14274,"SHARP, Philip Riley",IN,22,2,100,-1.740252229,-0.166,0,0,0,0,68
100,8,14276,"SMITH, Virginia Dodd",NE,35,3,200,1.509910415,0.238,0,0,1,0,78
100,8,14277,"SOLARZ, Stephen Joshua",NY,13,13,100,-2.289882639,-0.429,0,1,0,0,47
100,8,14280,"WAXMAN, Henry Arnold",CA,71,24,100,-2.69312321,-0.473,0,0,0,0,44
100,8,14288,"GOODLING, William Franklin",PA,14,19,200,0.804183211,0.336,0,0,0,1,67
100,8,14400,"AKAKA, Daniel Kahikina",HI,82,2,100,-1.930943423,-0.419,0,0,0,1,56
100,8,14402,"APPLEGATE, Douglas Earl",OH,24,18,100,-0.547839398,-0.106,0,0,0,0,53
100,8,14403,"BADHAM, Robert Edward",CA,71,40,200,2.479561622,0.541,1,0,0,1,75
100,8,14404,"BARNARD, Druie Douglas, Jr.",GA,44,10,100,-0.130571572,-0.028,0,0,0,1,65
100,8,14405,"BEILENSON, Anthony Charles",CA,71,23,100,-2.708683265,-0.44,0,0,0,0,53
100,8,14407,"BONIOR, David Edward",MI,23,12,100,-3.349880567,-0.547,0,0,0,1,66
100,8,14410,"COLEMAN, Earl Thomas",MO,34,6,200,1.814251582,0.262,0,0,0,0,61
100,8,14413,"DICKS, Norman DeValois",WA,73,6,100,-1.427241753,-0.312,0,0,0,0,57
100,8,14414,"DORNAN, Robert Kenneth",CA,71,38,200,2.365230417,0.49,0,1,0,1,69
100,8,14415,"EDWARDS, Marvin Henry (Mickey)",OK,53,5,200,2.452781403,0.394,0,0,0,0,76
100,8,14419,"FLIPPO, Ronnie Gene",AL,41,5,100,-0.132937357,-0.175,0,0,0,0,59
100,8,14421,"GEPHARDT, Richard Andrew",MO,34,3,100,-2.093946477,-0.416,0,0,0,1,65
100,8,14422,"GLICKMAN, Daniel Robert",KS,32,4,100,-1.467996195,-0.133,0,0,0,0,63
100,8,14427,"HUCKABY, Thomas Jerald",LA,45,5,100,-0.148824601,-0.009,0,0,0,0,66
100,8,14428,"IRELAND, Andrew Poysell (Andy)",FL,43,10,200,2.920984945,0.42,1,0,0,0,71
100,8,14429,"JENKINS, Edgar Lanier (Ed)",GA,44,9,100,-0.378088284,-0.116,0,0,0,1,69
100,8,14430,"KILDEE, Dale Edward",MI,23,7,100,-3.338381388,-0.385,0,0,0,0,54
100,8,14431,"KOSTMAYER, Peter Houston",PA,14,8,100,-2.960053587,-0.298,0,1,0,0,64
100,8,14432,"LEACH, James Albert Smith",IA,31,1,200,-0.027673702,0.141,0,1,0,0,52
100,8,14435,"MARKEY, Edward John",MA,3,7,100,-3.867079569,-0.5,0,0,0,1,50
100,8,14437,"MARLENEE, Ronald Charles",MT,64,2,200,2.3166859,0.393,0,0,0,0,63
100,8,14441,"MURPHY, Austin John",PA,14,22,100,-0.658072742,-0.081,0,0,0,1,43
100,8,14443,"OAKAR, Mary Rose",OH,24,20,100,-2.35691928,-0.4,0,0,1,0,48
100,8,14444,"PANETTA, Leon Edward",CA,71,16,100,-2.981881028,-0.258,0,0,0,1,53
100,8,14445,"PEASE, Donald James",OH,24,13,100,-2.06098282,-0.308,0,0,0,1,58
100,8,14446,"PURSELL, Carl Duane",MI,23,2,200,0.554664808,0.12,0,0,0,1,64
100,8,14448,"RAHALL, Nick Joe, II",WV,56,4,100,-1.734565177,-0.306,0,0,0,0,49
100,8,14451,"SKELTON, Isaac Newton, IV (Ike)",MO,34,4,100,-0.195570425,-0.172,1,0,0,0,67
100,8,14454,"STUMP, Robert Lee",AZ,61,3,200,4.423266619,0.703,1,0,0,1,71
100,8,14458,"VENTO, Bruce Frank",MN,33,4,100,-3.327937124,-0.472,0,0,0,0,40
100,8,14459,"VOLKMER, Harold Lee",MO,34,9,100,-0.848825299,-0.196,0,0,0,1,64
100,8,14460,"WALGREN, Douglas",PA,14,18,100,-2.433721907,-0.247,0,0,0,0,58
100,8,14461,"WALKER, Robert Smith",PA,14,16,200,3.505447718,0.581,0,0,0,1,74
100,8,14462,"WATKINS, Wesley Wade",OK,53,3,100,-0.511385439,-0.126,0,0,0,1,62
100,8,14463,"WEISS, Theodore S.",NY,13,17,100,-3.98895811,-0.564,0,1,0,1,25
100,8,14466,"STANGELAND, Arlan Ingehart",MN,33,7,200,2.227570429,0.346,0,0,0,0,57
100,8,14469,"LIVINGSTON, Robert Linlithgow, Jr.",LA,45,1,200,2.410155842,0.326,0,0,0,1,77
100,8,14470,"GARCIA, Robert",NY,13,18,100,-3.397556102,-0.559,0,0,0,1,19
100,8,14471,"GREEN, Sedgwick William (Bill)",NY,13,15,200,0.102828017,-0.044,0,0,0,1,39
100,8,14601,"ANTHONY, Beryl Franklin, Jr.",AR,42,4,100,-1.578131736,-0.254,0,0,0,0,56
100,8,14605,"BEREUTER, Douglas Kent",NE,35,1,200,0.739563206,0.231,0,1,0,1,67
100,8,14607,"BONER, William Hill",TN,54,5,100,-0.831677832,-0.228,0,0,0,0,52
100,8,14607,"BONER, William Hill",TN,54,5,100,-0.831677832,-0.228,0,0,0,0,52
100,8,14608,"BYRON, Beverly Barton Butcher",MD,52,6,100,-0.075985293,-0.024,1,0,1,0,69
100,8,14611,"CHENEY, Richard Bruce",WY,68,1,200,2.879381119,0.523,0,0,0,0,71
100,8,14612,"CLINGER, William Floyd, Jr.",PA,14,23,200,0.711223228,0.176,0,0,0,1,63
100,8,14613,"COELHO, Tony",CA,71,15,100,-2.396599684,-0.413,0,0,0,0,59
100,8,14614,"COURTER, James Andrew",NJ,12,12,200,1.569760143,0.269,1,0,0,0,65
100,8,14616,"DANNEMEYER, William Edwin",CA,71,39,200,3.33441782,0.691,0,0,0,1,77
100,8,14618,"DAVIS, Robert William",MI,23,11,200,0.584249437,0.098,1,0,0,0,59
100,8,14620,"DIXON, Julian Carey",CA,71,28,100,-3.394909733,-0.458,0,0,0,1,32
100,8,14621,"DONNELLY, Brian Joseph",MA,3,11,100,-1.958050106,-0.291,0,0,0,0,52
100,8,14624,"FAZIO, Victor Herbert, Jr.",CA,71,4,100,-2.260362838,-0.455,0,0,0,0,56
100,8,14626,"FROST, Jonas Martin",TX,49,24,100,-1.264812942,-0.316,0,0,0,1,53
100,8,14627,"GINGRICH, Newton Leroy",GA,44,6,200,2.570931289,0.377,0,0,0,0,69
100,8,14629,"GRAY, William Herbert, III",PA,14,2,100,-3.107339274,-0.511,0,0,0,0,10
100,8,14631,"GUARINI, Frank Joseph, Jr.",NJ,12,14,100,-1.822091194,-0.295,0,0,0,1,53
100,8,14632,"HALL, Tony Patrick",OH,24,3,100,-2.511706244,-0.28,0,0,0,0,56
100,8,14635,"HOPKINS, Larry Jones",KY,51,6,200,1.882858788,0.347,1,0,0,1,62
100,8,14636,"HUTTO, Earl Dewitt",FL,43,1,100,0.107198496,-0.007,1,0,0,1,76
100,8,14641,"LEATH, James Marvin",TX,49,11,100,-0.044080122,0.049,1,0,0,1,66
100,8,14643,"LELAND, George Thomas (Mickey)",TX,49,18,100,-3.501708882,-0.596,0,0,0,0,28
100,8,14644,"LEWIS, Charles Jeremy (Jerry)",CA,71,35,200,2.018656379,0.348,0,0,0,0,71
100,8,14646,"LOWRY, Michael Edward",WA,73,7,100,-2.387973434,-0.401,0,0,0,0,41
100,8,14647,"LUNGREN, Daniel Edward",CA,71,42,200,2.530564077,0.497,0,0,0,0,72
100,8,14648,"MICA, Daniel Andrew",FL,43,14,100,-0.941270989,-0.184,0,1,0,0,61
100,8,14649,"MATSUI, Robert T.",CA,71,3,100,-2.724795511,-0.404,0,0,0,0,55
100,8,14650,"MAVROULES, Nicholas James",MA,3,6,100,-2.093297317,-0.342,1,0,0,0,55
100,8,14651,"NELSON, Clarence William (Bill)",FL,43,11,100,-0.275103128,-0.192,0,0,0,1,74
100,8,14652,"PASHAYAN, Charles, Jr.",CA,71,17,200,1.48046272,0.282,0,0,0,1,63
100,8,14654,"RITTER, Donald Lawrence",PA,14,15,200,1.28119825,0.268,0,0,0,0,42
100,8,14655,"ROTH, Toby A.",WI,25,8,200,1.463275768,0.351,0,1,0,1,63
100,8,14656,"SABO, Martin Olav",MN,33,5,100,-3.23379728,-0.516,0,0,0,0,38
100,8,14657,"SENSENBRENNER, Frank James, Jr.",WI,25,9,200,1.451995024,0.646,0,0,0,0,65
100,8,14660,"SHUMWAY, Norman David",CA,71,14,200,3.958887768,0.556,0,0,0,0,64
100,8,14661,"SNOWE, Olympia Jean",ME,2,2,200,0.184226536,0.091,0,1,1,0,62
100,8,14662,"SOLOMON, Gerald Brooks Hunt",NY,13,24,200,2.829652518,0.492,0,1,0,1,69
100,8,14664,"STENHOLM, Charles Walter",TX,49,17,100,0.142430282,0.019,0,0,0,0,68
100,8,14666,"SWIFT, Allan Byron",WA,73,2,100,-2.335865218,-0.43,0,0,0,0,55
100,8,14667,"SYNAR, Michael Lynn",OK,53,2,100,-1.999934618,-0.321,0,0,0,0,64
100,8,14668,"TAUKE, Thomas Joseph",IA,31,2,200,0.567032153,0.27,0,0,0,0,53
100,8,14669,"THOMAS, William Marshall",CA,71,20,200,1.942830727,0.371,0,0,0,0,69
100,8,14670,"WHITTAKER, Robert Russell",KS,32,5,200,1.692061381,0.346,0,0,0,0,67
100,8,14672,"WILLIAMS, John Patrick",MT,64,1,100,-2.694143736,-0.315,0,0,0,1,58
100,8,14673,"WOLPE, Howard Eliot, III",MI,23,3,100,-3.199530616,-0.374,0,1,0,0,63
100,8,14675,"PETRI, Thomas Evert",WI,25,6,200,0.983912747,0.379,0,0,0,0,62
100,8,14677,"PORTER, John Edward",IL,21,10,200,0.798902457,0.217,0,0,0,1,68
100,8,14679,"TAUZIN, Wilbert Joseph (Billy)",LA,45,3,100,-0.018336712,0.03,0,0,0,0,65
100,8,14681,"CROCKETT, George William, Jr.",MI,23,13,100,-3.792139743,-0.651,0,1,0,0,15
100,8,14802,"BLILEY, Thomas Jerome, Jr.",VA,40,3,200,1.57505256,0.382,0,0,0,1,65
100,8,14803,"BROWN, George Hanks (Hank)",CO,62,4,200,1.242187101,0.511,0,0,0,1,68
100,8,14806,"COATS, Daniel Ray",IN,22,4,200,1.549445733,0.375,0,0,0,1,67
100,8,14808,"COYNE, William Joseph",PA,14,14,100,-2.980144771,-0.494,0,0,0,1,30
100,8,14809,"CRAIG, Larry Edwin",ID,63,1,200,2.678502463,0.494,0,0,0,0,68
100,8,14810,"DAUB, Harold John, Jr., (Hal)",NE,35,2,200,2.486455453,0.391,0,0,0,1,67
100,8,14812,"DORGAN, Byron Leslie",ND,36,1,100,-2.074865705,-0.267,0,0,0,0,65
100,8,14813,"DREIER, David Timothy",CA,71,33,200,3.85349542,0.478,0,0,0,0,70
100,8,14815,"DWYER, Bernard James",NJ,12,6,100,-2.079051222,-0.373,0,0,0,1,59
100,8,14816,"DYMALLY, Mervyn Malcolm",CA,71,31,100,-3.891767601,-0.685,0,1,0,0,41
100,8,14817,"DYSON, Royden Patrick",MD,52,1,100,-0.290395669,-0.104,1,0,0,0,65
100,8,14818,"ECKART, Dennis Edward",OH,24,11,100,-1.780661215,-0.242,0,0,0,0,59
100,8,14819,"EMERSON, Norvell William (Bill)",MO,34,8,200,2.00954856,0.332,0,0,0,1,61
100,8,14822,"FIELDS, Jack Milton, Jr.",TX,49,8,200,3.781397936,0.541,0,0,0,0,60
100,8,14823,"FOGLIETTA, Thomas Michael",PA,14,1,100,-2.757396461,-0.506,1,0,0,0,65
100,8,14824,"FRANK, Barney",MA,3,4,100,-3.496678132,-0.499,0,0,0,0,48
100,8,14825,"GEJDENSON, Samuel",CT,1,2,100,-2.756421772,-0.416,0,1,0,0,61
100,8,14826,"GREGG, Judd Alan",NH,4,2,200,2.089993157,0.429,0,0,0,0,68
100,8,14827,"GUNDERSON, Steven Craig",WI,25,3,200,0.966468562,0.203,0,0,0,0,55
100,8,14828,"HALL, Ralph Moody",TX,49,4,100,0.193194806,0.096,0,0,0,1,69
100,8,14829,"HANSEN, James Vear",UT,67,1,200,2.425202547,0.496,1,0,0,1,78
100,8,14831,"HATCHER, Charles Floyd",GA,44,2,100,-0.453647106,-0.202,0,0,0,1,59
100,8,14833,"HERTEL, Dennis Mark",MI,23,14,100,-2.234778095,-0.345,1,0,0,0,63
100,8,14834,"HILER, John Patrick",IN,22,3,200,2.318849374,0.413,0,0,0,0,62
100,8,14835,"HUNTER, Duncan Lee",CA,71,45,200,2.987587944,0.47,1,0,0,1,71
100,8,14837,"LANTOS, Thomas Peter",CA,71,11,100,-1.731834076,-0.376,0,1,0,0,50
100,8,14839,"LOWERY, William David",CA,71,41,200,1.778618396,0.33,0,0,0,0,64
100,8,14840,"MARTIN, David O'Brien",NY,13,26,200,1.541909518,0.232,1,0,0,1,65
100,8,14841,"MARTIN, Lynn Morley",IL,21,16,200,2.124510885,0.345,1,0,1,0,63
100,8,14842,"McCOLLUM, Ira William, Jr. (Bill)",FL,43,5,200,3.020256419,0.377,0,0,0,1,71
100,8,14843,"McCURDY, David Keith",OK,53,4,100,-0.590839178,-0.112,1,0,0,0,69
100,8,14844,"McEWEN, Bob",OH,24,6,200,2.678385245,0.359,0,0,0,0,68
100,8,14845,"McGRATH, Raymond Joseph",NY,13,5,200,0.952216188,0.185,0,0,0,0,60
100,8,14846,"MOLINARI, Guy Victor",NY,13,14,200,1.536351294,0.255,0,0,0,1,34
100,8,14847,"MORRISON, Sidney Wallace",WA,73,4,200,0.63077931,0.153,0,0,0,1,63
100,8,14852,"ROBERTS, Charles Patrick (Pat)",KS,32,1,200,1.376991649,0.415,0,0,0,1,74
100,8,14853,"ROEMER, Charles Elson (Buddy), III",LA,45,4,100,0.50380779,0.178,0,0,0,0,65
100,8,14853,"ROEMER, Charles Elson (Buddy), III",LA,45,4,100,0.50380779,0.178,0,0,0,0,65
100,8,14854,"ROGERS, Harold Dallas (Hal)",KY,51,5,200,2.016269937,0.331,0,0,0,1,69
100,8,14855,"ROUKEMA, Margaret Scafati",NJ,12,5,200,0.363730243,0.162,0,0,1,0,71
100,8,14856,"SAVAGE, Gus",IL,21,2,100,-3.40104764,-0.671,0,0,0,1,16
100,8,14857,"SCHNEIDER, Claudine",RI,5,2,200,-0.089934721,-0.026,0,0,1,0,53
100,8,14858,"SCHUMER, Charles Ellis (Chuck)",NY,13,10,100,-2.411868615,-0.35,0,0,0,0,49
100,8,14860,"SHAW, Eugene Clay, Jr.",FL,43,15,200,2.35055266,0.3,0,0,0,0,59
100,8,14861,"SKEEN, Joseph Richard",NM,66,2,200,1.875037094,0.301,0,0,0,1,66
100,8,14863,"SMITH, Christopher Henry",NJ,12,4,200,0.557519969,0.158,0,1,0,0,59
100,8,14864,"SMITH, Dennis Alan (Denny)",OR,72,5,200,2.245066402,0.603,0,0,0,1,59
100,8,14868,"WEBER, John Vincent (Vin)",MN,33,2,200,2.034804764,0.381,0,0,0,0,57
100,8,14869,"WOLF, Frank Rudolph",VA,40,10,200,1.711191286,0.284,0,0,0,1,59
100,8,14870,"WORTLEY, George Cornelius",NY,13,27,200,1.500909905,0.207,0,0,0,1,60
100,8,14871,"WYDEN, Ronald Lee",OR,72,3,100,-2.194681535,-0.314,0,0,0,0,47
100,8,14873,"HOYER, Steny Hamilton",MD,52,5,100,-1.908655678,-0.379,0,0,0,0,42
100,8,14874,"DOWDY, Charles Wayne",MS,46,4,100,-0.828952218,-0.259,0,0,0,0,59
100,8,14875,"OXLEY, Michael Garver",OH,24,4,200,2.386631175,0.382,0,0,0,0,74
100,8,14877,"KENNELLY, Barbara Bailey",CT,1,1,100,-2.08062174,-0.346,0,0,1,0,53
100,8,14879,"MART̍NEZ, Matthew G.",CA,71,30,100,-2.068570386,-0.341,0,0,0,1,55
100,8,15000,"ACKERMAN, Gary Leonard",NY,13,7,100,-3.39980456,-0.429,0,0,0,0,46
100,8,15001,"ANDREWS, Michael Allen",TX,49,25,100,-0.600259341,-0.135,0,0,0,0,53
100,8,15002,"BARTLETT, Harry Stephen (Steve)",TX,49,3,200,2.875245382,0.46,1,0,0,0,82
100,8,15003,"BATEMAN, Herbert Harvell",VA,40,1,200,1.575474778,0.242,0,0,0,1,62
100,8,15004,"BATES, Jim",CA,71,44,100,-2.598051308,-0.279,0,1,0,1,52
100,8,15005,"BERMAN, Howard Lawrence",CA,71,26,100,-2.843700018,-0.404,0,0,0,0,54
100,8,15006,"BILIRAKIS, Michael",FL,43,9,200,2.735312649,0.382,0,0,0,1,67
100,8,15007,"BOEHLERT, Sherwood Louis",NY,13,25,200,0.224113144,0.103,0,0,0,1,37
100,8,15008,"BORSKI, Robert Anthony, Jr.",PA,14,3,100,-2.013610287,-0.416,0,0,0,0,54
100,8,15009,"BOSCO, Douglas Harry",CA,71,1,100,-1.656759109,-0.271,0,0,0,0,52
100,8,15010,"BOUCHER, Frederick C.",VA,40,9,100,-1.972624525,-0.265,1,0,0,0,58
100,8,15011,"BOXER, Barbara",CA,71,6,100,-3.307348159,-0.45,0,0,1,0,42
100,8,15013,"BRYANT, John Wiley",TX,49,5,100,-1.71006224,-0.358,0,1,0,0,59
100,8,15014,"BURTON, Danny Lee",IN,22,6,200,3.327605757,0.585,0,0,0,1,72
100,8,15015,"CARPER, Thomas Richard",DE,11,1,100,-1.470180071,-0.174,0,0,0,1,60
100,8,15016,"CHANDLER, Rodney Dennis",WA,73,8,200,0.67878555,0.254,0,1,0,0,62
100,8,15017,"CLARKE, James McClure",NC,47,11,100,-1.401176039,-0.204,0,0,0,1,63
100,8,15018,"COLEMAN, Ronald D'Emory",TX,49,16,100,-1.208238519,-0.402,0,0,0,1,57
100,8,15019,"COOPER, James Hayes Shofner",TN,54,4,100,-0.892086578,-0.162,0,1,0,0,57
100,8,15020,"DeWINE, Michael",OH,24,7,200,2.021759574,0.289,0,0,0,0,68
100,8,15021,"DURBIN, Richard Joseph",IL,21,20,100,-2.589380233,-0.365,0,0,0,0,58
100,8,15022,"ERDREICH, Ben",AL,41,6,100,-0.105413145,-0.06,1,0,0,1,59
100,8,15023,"EVANS, Lane Allen",IL,21,17,100,-3.668428276,-0.454,0,1,0,1,54
100,8,15024,"FEIGHAN, Edward Farrell",OH,24,19,100,-2.528423623,-0.304,0,0,0,0,59
100,8,15026,"GEKAS, George William",PA,14,17,200,2.862385278,0.426,0,0,0,1,66
100,8,15028,"JOHNSON, Nancy Lee",CT,1,6,200,0.630327292,0.122,0,0,1,0,63
100,8,15029,"KAPTUR, Marcia Carolyn (Marcy)",OH,24,9,100,-2.080175083,-0.349,1,0,1,0,51
100,8,15030,"KASICH, John Richard",OH,24,12,200,1.941394335,0.314,0,0,0,0,65
100,8,15031,"KOLTER, Joseph Paul",PA,14,4,100,-1.042387471,-0.28,0,0,0,1,48
100,8,15032,"LEHMAN, Richard Henry",CA,71,18,100,-2.642829829,-0.27,0,0,0,0,51
100,8,15033,"LEVIN, Sander Martin",MI,23,17,100,-2.343962414,-0.377,0,1,0,0,54
100,8,15034,"LEVINE, Meldon Edises",CA,71,27,100,-2.708773679,-0.436,0,0,0,0,52
100,8,15035,"LEWIS, Thomas F.",FL,43,12,200,3.044779873,0.387,0,0,0,1,67
100,8,15036,"LIPINSKI, William Oliver",IL,21,5,100,-0.288098269,-0.176,0,1,0,1,58
100,8,15037,"MACK, Connie, III",FL,43,13,200,2.705959997,0.466,0,1,0,0,74
100,8,15038,"MacKAY, Kenneth Hood, Jr. (Buddy)",FL,43,6,100,-1.543888805,-0.13,0,0,0,1,64
100,8,15040,"McCANDLESS, Alfred A.",CA,71,37,200,3.41003955,0.474,1,0,0,1,65
100,8,15041,"McCLOSKEY, Francis Xavier",IN,22,8,100,-2.367830812,-0.336,0,0,0,1,60
100,8,15044,"MOODY, Jim",WI,25,5,100,-2.883248892,-0.347,0,0,0,0,40
100,8,15045,"MORRISON, Bruce Andrew",CT,1,3,100,-3.378190808,-0.396,0,0,0,0,59
100,8,15046,"MRAZEK, Robert Jan",NY,13,3,100,-2.112986907,-0.349,0,0,0,1,64
100,8,15047,"NIELSON, Howard Curtis",UT,67,3,200,2.851296311,0.505,0,0,0,1,77
100,8,15048,"OLIN, James R.",VA,40,6,100,-1.496157635,-0.119,0,0,0,1,66
100,8,15049,"ORTIZ, Solomon P.",TX,49,27,100,-1.055466685,-0.272,1,0,0,1,53
100,8,15050,"OWENS, Major Robert Odell",NY,13,12,100,-4.22907014,-0.569,0,0,0,0,14
100,8,15051,"PACKARD, Ronald C.",CA,71,43,200,3.251768361,0.419,0,0,0,1,74
100,8,15052,"PENNY, Timothy Joseph",MN,33,1,100,-1.088830858,-0.051,0,0,0,0,55
100,8,15053,"RAY, Richard Belmont",GA,44,3,100,-0.24484975,0.035,1,0,0,1,55
100,8,15055,"RICHARDSON, Bill",NM,66,3,100,-1.148158421,-0.321,0,0,0,0,53
100,8,15056,"RIDGE, Thomas Joseph",PA,14,21,200,0.369451199,0.186,0,0,0,1,53
100,8,15057,"ROWLAND, James Roy, Jr.",GA,44,8,100,-0.466236175,-0.127,0,0,0,1,52
100,8,15058,"SCHAEFER, Daniel",CO,62,6,200,2.168665608,0.479,0,0,0,1,69
100,8,15059,"SIKORSKI, Gerald Edward",MN,33,6,100,-3.121560369,-0.217,1,0,0,0,52
100,8,15060,"SISISKY, Norman",VA,40,4,100,-0.30962417,-0.122,0,0,0,1,56
100,8,15061,"SLATTERY, James Charles",KS,32,2,100,-0.923306366,-0.099,0,0,0,0,64
100,8,15062,"SMITH, Lawrence Jack",FL,43,16,100,-1.751360896,-0.355,0,1,0,0,61
100,8,15063,"SMITH, Robert Freeman",OR,72,2,200,1.476748695,0.396,1,0,0,0,64
100,8,15064,"SPRATT, John McKee, Jr.",SC,48,5,100,-1.072557369,-0.256,0,0,0,1,62
100,8,15065,"STAGGERS, Harley Orrin, Jr.",WV,56,2,100,-2.222078542,-0.315,0,0,0,0,58
100,8,15066,"SUNDQUIST, Donald Kenneth",TN,54,7,200,2.210087813,0.371,0,0,0,1,66
100,8,15068,"TALLON, Robert Mooneyhan, Jr. (Robin)",SC,48,6,100,-0.089724949,-0.1,0,0,0,0,57
100,8,15069,"THOMAS, Robert Lindsay",GA,44,1,100,-0.449149161,-0.14,0,0,0,0,59
100,8,15070,"TORRES, Esteban Edward",CA,71,34,100,-3.015891788,-0.487,0,1,0,1,59
100,8,15071,"TORRICELLI, Robert Guy",NJ,12,9,100,-1.815440008,-0.262,0,0,0,0,59
100,8,15072,"TOWNS, Edolphus",NY,13,11,100,-4.469618846,-0.519,0,0,0,1,21
100,8,15073,"VALENTINE, Itimous Thaddeus, Jr., (Tim)",NC,47,2,100,-0.307648282,-0.084,0,0,0,1,53
100,8,15075,"VUCANOVICH, Barbara Farrell",NV,65,2,200,3.000259686,0.441,0,0,1,0,69
100,8,15076,"WHEAT, Alan Dupree",MO,34,5,100,-3.944515605,-0.465,0,0,0,0,46
100,8,15077,"WISE, Robert Ellsworth, Jr.",WV,56,3,100,-1.715994403,-0.32,0,0,0,0,56
100,8,15079,"HAYES, Charles Arthur",IL,21,1,100,-4.673449654,-0.656,0,0,0,0,5
100,8,15081,"DARDEN, George (Buddy)",GA,44,7,100,-0.328569274,-0.161,0,0,0,0,73
100,8,15082,"KLECZKA, Gerald Daniel",WI,25,4,100,-2.415785691,-0.322,0,0,0,1,48
100,8,15083,"MOLLOHAN, Alan Bowlby",WV,56,1,100,-0.392981188,-0.292,0,0,0,1,57
100,8,15084,"ATKINS, Chester Greenough",MA,3,5,100,-3.231035685,-0.407,1,1,0,0,57
100,8,15085,"BARTON, Joe Linus",TX,49,6,200,3.076646463,0.528,0,0,0,0,70
100,8,15086,"BENTLEY, Helen Delich",MD,52,2,200,1.428878097,0.276,0,0,1,0,66
100,8,15087,"BOULTER, Eldon Beau",TX,49,13,200,3.244693106,0.483,0,0,0,0,72
100,8,15088,"BRUCE, Terry Lee",IL,21,19,100,-2.753434936,-0.268,0,0,0,0,62
100,8,15089,"BUSTAMANTE, Albert G.",TX,49,23,100,-1.47111953,-0.392,1,0,0,1,59
100,8,15090,"CALLAHAN, Herbert Leon (Sonny)",AL,41,1,200,1.955608272,0.373,0,0,0,1,64
100,8,15092,"COBLE, Howard",NC,47,6,200,1.839466138,0.52,0,0,0,1,65
100,8,15093,"COMBEST, Larry Ed",TX,49,19,200,2.670606848,0.458,0,0,0,0,75
100,8,15094,"DeLAY, Thomas Dale",TX,49,22,200,3.967322407,0.593,0,0,0,0,70
100,8,15095,"DioGUARDI, Joseph J.",NY,13,20,200,1.016935955,0.218,0,0,0,0,56
100,8,15098,"FAWELL, Harris W.",IL,21,13,200,1.134389417,0.332,0,0,0,0,54
100,8,15099,"GALLO, Dean Anderson",NJ,12,11,200,1.422190853,0.203,0,0,0,0,69
100,8,15100,"GORDON, Barton Jennings",TN,54,6,100,-1.464728837,-0.204,0,0,0,1,59
100,8,15101,"GRAY, Kenneth James",IL,21,22,100,-1.946359029,-0.438,0,0,0,1,56
100,8,15103,"HENRY, Paul B.",MI,23,5,200,0.584900895,0.264,0,0,0,0,68
100,8,15104,"KANJORSKI, Paul E.",PA,14,11,100,-1.268735103,-0.303,0,0,0,1,55
100,8,15105,"KOLBE, James Thomas",AZ,61,5,200,2.081719848,0.351,0,0,0,1,62
100,8,15106,"LIGHTFOOT, James Ross",IA,31,5,200,1.577390686,0.391,0,0,0,1,57
100,8,15107,"MANTON, Thomas J.",NY,13,9,100,-2.089553395,-0.361,0,0,0,1,57
100,8,15108,"McMILLAN, John Alexander, III (Alex)",NC,47,9,200,1.580094803,0.294,0,0,0,1,64
100,8,15109,"MEYERS, Jan",KS,32,3,200,0.818959959,0.208,0,0,1,0,63
100,8,15110,"MILLER, John Ripin",WA,73,1,200,0.740475086,0.168,0,0,0,0,57
100,8,15112,"SAXTON, Hugh James",NJ,12,13,200,1.274463059,0.238,0,0,0,0,65
100,8,15114,"SCHUETTE, Bill",MI,23,10,200,1.084055153,0.28,0,0,0,0,67
100,8,15115,"SLAUGHTER, Daniel French, Jr.",VA,40,7,200,2.51476113,0.38,0,0,0,1,68
100,8,15116,"SMITH, Robert C.",NH,4,1,200,3.21742341,0.623,0,0,0,1,70
100,8,15117,"STALLINGS, Richard Howard",ID,63,2,100,-0.728793359,-0.084,0,0,0,0,76
100,8,15119,"SWEENEY, David McCann (Mac)",TX,49,14,200,1.857893849,0.367,1,0,0,0,67
100,8,15120,"SWINDALL, Patrick Lynn",GA,44,4,200,2.616492835,0.513,0,0,0,0,66
100,8,15121,"TRAFICANT, James A., Jr.",OH,24,17,100,-1.653405468,-0.082,0,0,0,0,42
100,8,15122,"ROBINSON, Tommy Franklin",AR,42,2,100,0.021397344,-0.013,1,0,0,1,60
100,8,15123,"ROWLAND, John",CT,1,5,200,0.994214549,0.169,1,0,0,0,67
100,8,15124,"VISCLOSKY, Peter",IN,22,1,100,-2.33799425,-0.402,0,0,0,0,43
100,8,15125,"ARMEY, Richard Keith",TX,49,26,200,3.443790522,0.635,0,0,0,0,76
100,8,15129,"CHAPMAN, Jim",TX,49,1,100,-0.472183205,-0.198,0,0,0,0,61
100,8,15171,"PATTERSON, Elizabeth J.",SC,48,4,100,-0.475183225,-0.055,0,0,1,0,70
100,8,15228,"PERKINS, Carl Christopher",KY,51,7,100,-2.182958563,-0.56,0,0,0,0,49
100,8,15401,"BAKER, Richard Hugh",LA,45,6,200,1.751962408,0.423,0,0,0,0,64
100,8,15402,"BALLENGER, Cass",NC,47,10,200,2.098882863,0.464,0,1,0,1,70
100,8,15403,"BILBRAY, James Hubert",NV,65,1,100,-0.7363836,-0.184,1,0,0,0,62
100,8,15404,"BRENNAN, Joseph Edward",ME,2,1,100,-2.244258785,-0.308,0,0,0,0,60
100,8,15405,"BUECHNER, John William (Jack)",MO,34,2,200,1.835505228,0.33,0,0,0,0,66
100,8,15406,"BUNNING, James Paul David",KY,51,4,200,2.923753893,0.521,0,0,0,0,70
100,8,15407,"CAMPBELL, Ben Nighthorse",CO,62,3,100,-1.22691122,-0.141,0,0,0,1,63
100,8,15408,"CARDIN, Benjamin Louis",MD,52,3,100,-2.642113913,-0.329,1,0,0,0,50
100,8,15409,"DAVIS, Jack",IL,21,4,200,1.813908176,0.393,0,0,0,1,50
100,8,15410,"DeFAZIO, Peter Anthony",OR,72,4,100,-2.565534691,-0.428,0,0,0,1,54
100,8,15411,"ESPY, Alphonso Michael (Mike)",MS,46,2,100,-2.260283334,-0.386,0,0,0,0,50
100,8,15412,"FLAKE, Floyd Harold",NY,13,6,100,-3.179100669,-0.455,0,0,0,0,33
100,8,15413,"GALLEGLY, Elton W.",CA,71,21,200,2.578821143,0.402,0,0,0,0,72
100,8,15414,"GRANDY, Frederick Lawrence",IA,31,6,200,0.926134229,0.283,0,0,0,0,57
100,8,15416,"HARRIS, Claude, Jr.",AL,41,7,100,-0.081351356,-0.085,0,0,0,0,59
100,8,15417,"HASTERT, John Dennis",IL,21,14,200,2.402673332,0.443,0,0,0,0,69
100,8,15418,"HAYES, James Allison",LA,45,7,100,-0.529938791,-0.057,0,0,0,0,59
100,8,15419,"HEFLEY, Joel M.",CO,62,5,200,2.173657581,0.591,0,0,0,0,75
100,8,15420,"HERGER, Walter William (Wally)",CA,71,2,200,2.328465064,0.551,1,0,0,0,63
100,8,15421,"HOCHBRUECKNER, George Joseph",NY,13,1,100,-2.400041147,-0.348,0,0,0,1,66
100,8,15422,"HOLLOWAY, Clyde Cecil",LA,45,8,200,2.08401583,0.475,0,0,0,0,50
100,8,15423,"HOUGHTON, Amory, Jr.",NY,13,34,200,0.853967781,0.154,0,0,0,1,68
100,8,15424,"INHOFE, James Mountain",OK,53,1,200,2.538915192,0.551,0,0,0,0,70
100,8,15425,"JOHNSON, Timothy Peter (Tim)",SD,37,1,100,-1.171165458,-0.25,0,0,0,0,63
100,8,15426,"JONTZ, James Prather",IN,22,5,100,-2.625040214,-0.357,0,0,0,0,69
100,8,15427,"KENNEDY, Joseph Patrick, II",MA,3,8,100,-2.869579629,-0.413,0,0,0,0,36
100,8,15428,"KONNYU, Ernest Leslie",CA,71,12,200,1.452815984,0.372,0,0,0,1,57
100,8,15429,"KYL, Jon Llewellyn",AZ,61,4,200,3.444256181,0.548,1,0,0,0,71
100,8,15429,"KYL, Jon Llewellyn",AZ,61,4,200,3.444256181,0.548,1,0,0,0,71
100,8,15429,"KYL, Jon Llewellyn",AZ,61,4,200,3.444256181,0.548,1,0,0,0,71
100,8,15429,"KYL, Jon Llewellyn",AZ,61,4,200,3.444256181,0.548,1,0,0,0,71
100,8,15430,"LANCASTER, H. Martin",NC,47,3,100,-0.390393828,-0.134,0,0,0,1,61
100,8,15431,"LEWIS, John R.",GA,44,5,100,-3.919822136,-0.588,0,0,0,0,67
100,8,15432,"McMILLEN, Charles Thomas",MD,52,4,100,-1.128710936,-0.214,0,0,0,0,59
100,8,15433,"MFUME, Kweisi",MD,52,7,100,-2.757219369,-0.446,0,0,0,0,18
100,8,15434,"MORELLA, Constance A.",MD,52,8,200,-0.012575669,-0.018,0,0,1,0,48
100,8,15435,"NAGLE, David Ray",IA,31,3,100,-2.378299097,-0.349,0,0,0,0,52
100,8,15437,"PICKETT, Owen Bradford",VA,40,2,100,-0.705692798,-0.149,1,0,0,0,63
100,8,15438,"PRICE, David Eugene",NC,47,4,100,-1.379180575,-0.339,1,0,0,0,60
100,8,15439,"RAVENEL, Arthur, Jr.",SC,48,1,200,1.091314007,0.162,0,0,0,1,64
100,8,15440,"RHODES, John Jacob, III",AZ,61,1,200,2.146479485,0.407,0,0,0,1,72
100,8,15441,"SAIKI, Patricia",HI,82,1,200,0.559221061,0.096,0,0,1,0,55
100,8,15442,"SAWYER, Thomas Charles",OH,24,14,100,-2.460265151,-0.377,0,0,0,0,51
100,8,15443,"SKAGGS, David Evans",CO,62,2,100,-1.99702356,-0.355,0,0,0,1,61
100,8,15444,"SLAUGHTER, Louise McIntosh",NY,13,30,100,-1.95736507,-0.464,0,0,1,0,63
100,8,15445,"SMITH, Lamar Seeligson",TX,49,21,200,2.184938312,0.423,0,0,0,0,78
100,8,15446,"UPTON, Frederick Stephen",MI,23,4,200,1.644572798,0.339,1,0,0,0,69
100,8,15447,"WELDON, Wayne Curtis (Curt)",PA,14,7,200,1.045888562,0.232,0,0,0,0,62
100,8,15449,"SHAYS, Christopher H.",CT,1,4,200,0.258691968,0.129,0,0,0,0,63
100,8,15449,"SHAYS, Christopher H.",CT,1,4,200,0.258691968,0.129,0,0,0,0,63
100,8,15450,"CLEMENT, Robert Nelson",TN,54,5,100,-1.074649724,-0.216,0,0,0,1,52
100,8,15450,"CLEMENT, Robert Nelson",TN,54,5,100,-1.074649724,-0.216,0,0,0,1,52
100,8,15451,"McCRERY, James O., III",LA,45,4,200,2.255955763,0.362,0,0,0,0,65
100,8,15451,"McCRERY, James O., III",LA,45,4,200,2.255955763,0.362,0,0,0,0,65
100,8,15452,"PAYNE, Lewis Franklin, Jr.",VA,40,5,100,-1.161036691,-0.148,0,0,0,1,65
100,8,15452,"PAYNE, Lewis Franklin, Jr.",VA,40,5,100,-1.161036691,-0.148,0,0,0,1,65
100,8,15453,"COSTELLO, Jerry Francis",IL,21,21,100,-1.811140847,-0.317,0,0,0,0,53
100,8,15453,"COSTELLO, Jerry Francis",IL,21,21,100,-1.811140847,-0.317,0,0,0,0,53
100,8,95415,"GRANT, James William",FL,43,2,100,-0.37645417,-0.218,0,0,0,0,62
101,9,633,"BENNETT, Charles Edward",FL,43,3,100,-0.506500784,-0.088,1,0,0,1,60
101,9,1077,"BROOKS, Jack Bascom",TX,49,9,100,-2.020850425,-0.407,0,0,0,1,47
101,9,1087,"BROOMFIELD, William S.",MI,23,18,200,1.656956338,0.227,0,1,0,0,70
101,9,2009,"CONTE, Silvio Ottavio",MA,3,1,200,-0.989886554,-0.023,0,0,0,1,41
101,9,2605,"DINGELL, John David, Jr.",MI,23,16,100,-2.399848106,-0.448,0,0,0,1,53
101,9,3078,"FASCELL, Dante Bruno",FL,43,19,100,-1.290480891,-0.4,0,1,0,1,59
101,9,5101,"KASTENMEIER, Robert William",WI,25,2,100,-3.220504864,-0.514,0,0,0,1,44
101,9,6455,"MICHEL, Robert Henry",IL,21,18,200,1.848413898,0.372,0,0,0,1,55
101,9,6845,"NATCHER, William Huston",KY,51,2,100,-0.956766692,-0.288,0,0,0,1,58
101,9,8080,"ROSTENKOWSKI, Daniel David",IL,21,8,100,-1.394899034,-0.39,0,0,0,1,41
101,9,8672,"SMITH, Neal Edward",IA,31,4,100,-1.216955496,-0.313,0,0,0,1,41
101,9,10075,"WHITTEN, Jamie Lloyd",MS,46,1,100,-0.622968091,-0.161,0,0,0,0,59
101,9,10391,"WRIGHT, James Claude, Jr.",TX,49,12,100,-2.265539592,-0.383,0,0,0,1,53
101,9,10391,"WRIGHT, James Claude, Jr.",TX,49,12,100,-2.265539592,-0.383,0,0,0,1,53
101,9,10421,"YATES, Sidney Richard",IL,21,9,100,-3.81013314,-0.494,0,0,0,1,38
101,9,10520,"GONŹLEZ, Henry B.",TX,49,20,100,-2.754481103,-0.538,0,0,0,0,32
101,9,10566,"UDALL, Morris King",AZ,61,2,100,-2.455080663,-0.387,0,1,0,1,43
101,9,10573,"BROWN, George Edward, Jr.",CA,71,36,100,-2.203598007,-0.506,0,0,0,1,51
101,9,10583,"EDWARDS, William Donlon (Don)",CA,71,10,100,-4.266038631,-0.599,0,0,0,1,44
101,9,10588,"GIBBONS, Sam Melville",FL,43,7,100,-1.190394791,-0.233,0,0,0,1,58
101,9,10595,"HAWKINS, Augustus Freeman (Gus)",CA,71,29,100,-4.200160501,-0.517,0,0,0,0,19
101,9,10596,"HORTON, Frank Jefferson",NY,13,29,200,-0.452841869,-0.004,0,0,0,1,53
101,9,10607,"McDADE, Joseph Michael",PA,14,10,200,0.93467474,0.093,0,0,0,0,58
101,9,10614,"PICKLE, James Jarrell (Jake)",TX,49,10,100,-0.620470509,-0.218,0,0,0,1,46
101,9,10616,"QUILLEN, James Henry",TN,54,1,200,1.345302842,0.246,0,0,0,1,68
101,9,10621,"ROYBAL, Edward R.",CA,71,25,100,-3.532838764,-0.61,0,0,0,1,32
101,9,10703,"ANNUNZIO, Frank",IL,21,11,100,-1.781482341,-0.398,0,0,0,0,53
101,9,10713,"CONYERS, John, Jr.",MI,23,1,100,-4.22004066,-0.658,0,0,0,1,11
101,9,10716,"de la GARZA, Eligio, II (Kika)",TX,49,15,100,-1.175108417,-0.255,0,0,0,1,37
101,9,10717,"DICKINSON, William Louis",AL,41,2,200,2.597525482,0.398,1,0,0,1,62
101,9,10726,"FOLEY, Thomas Stephen",WA,73,5,100,-2.198938824,-0.354,0,0,0,0,51
101,9,10727,"FORD, William David",MI,23,15,100,-3.268242611,-0.516,0,0,0,1,54
101,9,10732,"HAMILTON, Lee Herbert",IN,22,9,100,-1.295966192,-0.171,0,1,0,0,58
101,9,10742,"JACOBS, Andrew, Jr.",IN,22,10,100,-1.296513699,-0.07,0,0,0,1,48
101,9,10768,"SCHEUER, James Haas",NY,13,8,100,-3.341181609,-0.478,0,0,0,1,40
101,9,10788,"JONES, Walter Beaman, Sr.",NC,47,1,100,-1.8314882,-0.259,0,0,0,0,54
101,9,10794,"VANDER JAGT, Guy Adrian",MI,23,9,200,1.989444738,0.247,0,0,0,0,62
101,9,11000,"BEVILL, Tom",AL,41,4,100,-0.241427856,-0.213,0,0,0,1,57
101,9,11020,"HAMMERSCHMIDT, John Paul",AR,42,3,200,2.800628466,0.253,0,0,0,1,66
101,9,11028,"LUKENS, Donald Edgar",OH,24,8,200,2.056837344,0.459,0,1,0,1,69
101,9,11034,"MILLER, Clarence E.",OH,24,10,200,2.107711276,0.416,0,0,0,0,61
101,9,11035,"MONTGOMERY, Gillespie V. (Sonny)",MS,46,3,100,0.415138467,0.017,1,0,0,1,66
101,9,11036,"MYERS, John Thomas",IN,22,7,200,1.717873104,0.236,0,0,0,1,63
101,9,11058,"WYLIE, Chalmers Pangburn",OH,24,15,200,1.953927717,0.23,0,0,0,1,62
101,9,11067,"GAYDOS, Joseph Matthew",PA,14,20,100,-0.834086538,-0.278,0,0,0,1,34
101,9,12000,"ALEXANDER, William Vollie (Bill), Jr.",AR,42,1,100,-1.389852071,-0.41,0,0,0,1,51
101,9,12001,"ANDERSON, Glenn Malcolm",CA,71,32,100,-1.768932471,-0.269,0,0,0,1,50
101,9,12009,"CLAY, William Lacy, Sr.",MO,34,1,100,-4.859497125,-0.49,0,0,0,1,27
101,9,12010,"COUGHLIN, Robert Lawrence",PA,14,13,200,1.043035878,0.204,0,0,0,1,56
101,9,12013,"FISH, Hamilton, Jr.",NY,13,21,200,0.186554777,0.07,0,0,0,1,61
101,9,12030,"STOKES, Louis",OH,24,21,100,-4.753192202,-0.578,0,0,0,1,19
101,9,12035,"YATRON, Gus",PA,14,6,100,-1.004240533,-0.174,0,1,0,0,61
101,9,12036,"OBEY, David Ross",WI,25,7,100,-2.544691852,-0.45,0,0,0,0,45
101,9,12041,"CRANE, Philip Miller",IL,21,12,200,4.672109278,0.739,0,0,0,1,70
101,9,12042,"ROE, Robert A.",NJ,12,8,100,-1.141136645,-0.326,0,0,0,1,53
101,9,13002,"ARCHER, William Reynolds, Jr.",TX,49,7,200,3.180616272,0.496,0,0,0,1,77
101,9,13003,"ASPIN, Leslie",WI,25,1,100,-0.865405578,-0.32,1,0,0,1,48
101,9,13011,"DELLUMS, Ronald V.",CA,71,8,100,-4.440949799,-0.644,1,0,0,1,29
101,9,13015,"FRENZEL, William Eldridge",MN,33,3,200,1.002850099,0.353,0,0,0,1,54
101,9,13021,"LENT, Norman Frederick",NY,13,4,200,1.220968301,0.183,0,0,0,1,58
101,9,13024,"MAZZOLI, Romano Louis",KY,51,3,100,-0.876080468,-0.186,0,0,0,1,46
101,9,13035,"RANGEL, Charles B.",NY,13,16,100,-4.207012869,-0.514,0,0,0,1,11
101,9,13042,"SPENCE, Floyd Davidson",SC,48,2,200,2.224625755,0.32,1,0,0,1,59
101,9,13047,"YOUNG, Charles William (Bill)",FL,43,8,200,2.90961602,0.325,0,0,0,1,56
101,9,14015,"GILMAN, Benjamin Arthur",NY,13,22,200,0.08936313,0.043,0,1,0,1,57
101,9,14029,"LEHMAN, William",FL,43,17,100,-3.520936617,-0.483,0,0,0,0,59
101,9,14033,"MADIGAN, Edward Rell",IL,21,15,200,1.697883438,0.247,0,0,0,0,62
101,9,14039,"MOAKLEY, John Joseph",MA,3,9,100,-2.932826431,-0.418,0,0,0,1,45
101,9,14040,"MOORHEAD, Carlos John",CA,71,22,200,3.236779897,0.465,0,0,0,1,64
101,9,14042,"OWENS, Douglas Wayne",UT,67,2,100,-2.361635029,-0.253,0,1,0,0,58
101,9,14043,"PARRIS, Stanford E.",VA,40,8,200,1.784811756,0.287,0,0,0,1,60
101,9,14045,"REGULA, Ralph Straus",OH,24,16,200,0.825931431,0.221,0,0,0,1,57
101,9,14046,"RINALDO, Matthew John",NJ,12,7,200,0.428194528,0.023,0,0,0,0,59
101,9,14048,"ROSE, Charles Grandison, III",NC,47,7,100,-1.737784156,-0.319,0,0,0,0,51
101,9,14051,"SCHROEDER, Patricia Scott",CO,62,1,100,-2.147281878,-0.225,1,0,1,0,36
101,9,14052,"SHUSTER, E. G. (Bud)",PA,14,9,200,2.529961246,0.416,0,0,0,1,63
101,9,14053,"STARK, Fortney Hillman (Pete), Jr.",CA,71,9,100,-3.439621672,-0.631,0,0,0,1,42
101,9,14055,"STUDDS, Gerry Eastman",MA,3,10,100,-3.816346567,-0.444,0,1,0,0,48
101,9,14062,"WILSON, Charles",TX,49,2,100,0.147127165,-0.196,0,0,0,1,50
101,9,14066,"YOUNG, Donald Edwin",AK,81,1,200,1.809511222,0.278,0,0,0,1,60
101,9,14067,"BOGGS, Corinne Claiborne (Lindy)",LA,45,2,100,-0.86755125,-0.359,0,0,1,0,31
101,9,14068,"COLLINS, Cardiss",IL,21,7,100,-4.598174643,-0.552,0,0,1,0,22
101,9,14070,"LUKEN, Thomas Andrew",OH,24,1,100,-1.467912068,-0.163,0,0,0,1,63
101,9,14071,"LAGOMARSINO, Robert John",CA,71,19,200,2.138603271,0.378,0,1,0,1,54
101,9,14072,"MURTHA, John Patrick, Jr.",PA,14,12,100,-0.600392041,-0.265,0,0,0,1,47
101,9,14075,"TRAXLER, Jerome Bob",MI,23,8,100,-1.975805907,-0.33,0,0,0,1,50
101,9,14201,"AuCOIN, Les",OR,72,1,100,-2.668621553,-0.231,0,0,0,1,47
101,9,14210,"CARR, Milton Robert (Bob)",MI,23,6,100,-1.87654522,-0.254,0,0,0,0,57
101,9,14212,"DERRICK, Butler Carson, Jr.",SC,48,3,100,-1.065801199,-0.215,0,0,0,0,66
101,9,14214,"DOWNEY, Thomas Joseph",NY,13,2,100,-3.330673252,-0.384,0,0,0,0,61
101,9,14216,"EARLY, Joseph Daniel",MA,3,3,100,-1.482515088,-0.254,0,0,0,1,50
101,9,14219,"ENGLISH, Glenn Lee, Jr.",OK,53,6,100,0.348093941,-0.027,0,0,0,0,58
101,9,14223,"FLORIO, James Joseph",NJ,12,1,100,-1.500945549,-0.318,0,0,0,1,52
101,9,14224,"FORD, Harold Eugene",TN,54,9,100,-3.824905305,-0.438,0,0,0,0,34
101,9,14225,"GRADISON, Willis David, Jr.",OH,24,2,200,1.09129067,0.233,0,0,0,0,62
101,9,14233,"HEFNER, Willie Gathrel (Bill)",NC,47,8,100,-0.690511346,-0.264,0,0,0,0,62
101,9,14237,"HUBBARD, Carroll, Jr.",KY,51,1,100,0.14923061,-0.038,0,0,0,0,51
101,9,14238,"HUGHES, William John",NJ,12,2,100,-0.738156279,-0.153,0,0,0,0,58
101,9,14239,"HYDE, Henry John",IL,21,6,200,1.913080391,0.312,0,1,0,1,68
101,9,14248,"LaFALCE, John Joseph",NY,13,32,100,-1.510661003,-0.357,0,0,0,1,48
101,9,14251,"LLOYD, Marilyn Laird",TN,54,3,100,0.080441576,-0.058,1,0,1,0,62
101,9,14253,"McHUGH, Matthew Francis",NY,13,28,100,-2.210346038,-0.353,0,0,0,0,52
101,9,14256,"MILLER, George",CA,71,7,100,-3.89011887,-0.552,0,0,0,0,46
101,9,14257,"MINETA, Norman Y.",CA,71,13,100,-3.334596169,-0.479,0,0,0,1,49
101,9,14262,"NEAL, Stephen Lybrook",NC,47,5,100,-1.119366571,-0.145,0,0,0,0,60
101,9,14264,"NOWAK, Henry James",NY,13,33,100,-2.07451002,-0.332,0,0,0,1,33
101,9,14265,"OBERSTAR, James Louis",MN,33,8,100,-2.839075524,-0.553,0,0,0,0,39
101,9,14271,"RUSSO, Martin Anthony",IL,21,3,100,-2.10493012,-0.192,0,0,0,0,58
101,9,14273,"SCHULZE, Richard Taylor",PA,14,5,200,1.151059132,0.271,0,0,0,1,65
101,9,14274,"SHARP, Philip Riley",IN,22,2,100,-1.746519922,-0.166,0,0,0,0,65
101,9,14276,"SMITH, Virginia Dodd",NE,35,3,200,1.531510505,0.238,0,0,1,0,67
101,9,14277,"SOLARZ, Stephen Joshua",NY,13,13,100,-2.040329112,-0.429,0,1,0,0,43
101,9,14280,"WAXMAN, Henry Arnold",CA,71,24,100,-2.977582093,-0.473,0,0,0,0,34
101,9,14288,"GOODLING, William Franklin",PA,14,19,200,1.164798686,0.336,0,0,0,1,65
101,9,14400,"AKAKA, Daniel Kahikina",HI,82,2,100,-2.181501107,-0.419,0,0,0,1,44
101,9,14402,"APPLEGATE, Douglas Earl",OH,24,18,100,-0.61740507,-0.106,0,0,0,0,47
101,9,14404,"BARNARD, Druie Douglas, Jr.",GA,44,10,100,0.45976392,-0.028,0,0,0,1,65
101,9,14405,"BEILENSON, Anthony Charles",CA,71,23,100,-2.18548771,-0.44,0,0,0,0,43
101,9,14407,"BONIOR, David Edward",MI,23,12,100,-2.809904744,-0.547,0,0,0,1,60
101,9,14410,"COLEMAN, Earl Thomas",MO,34,6,200,1.423754676,0.262,0,0,0,0,50
101,9,14413,"DICKS, Norman DeValois",WA,73,6,100,-1.113493596,-0.312,0,0,0,0,48
101,9,14414,"DORNAN, Robert Kenneth",CA,71,38,200,2.62808535,0.49,1,0,0,1,61
101,9,14415,"EDWARDS, Marvin Henry (Mickey)",OK,53,5,200,2.416477462,0.394,0,0,0,0,67
101,9,14419,"FLIPPO, Ronnie Gene",AL,41,5,100,0.155228233,-0.175,0,0,0,0,59
101,9,14421,"GEPHARDT, Richard Andrew",MO,34,3,100,-2.440686608,-0.416,0,0,0,1,53
101,9,14422,"GLICKMAN, Daniel Robert",KS,32,4,100,-1.312353517,-0.133,0,0,0,0,55
101,9,14427,"HUCKABY, Thomas Jerald",LA,45,5,100,0.338967119,-0.009,0,0,0,0,62
101,9,14428,"IRELAND, Andrew Poysell (Andy)",FL,43,10,200,2.904265009,0.42,1,0,0,0,66
101,9,14429,"JENKINS, Edgar Lanier (Ed)",GA,44,9,100,-0.054221655,-0.116,0,0,0,1,71
101,9,14430,"KILDEE, Dale Edward",MI,23,7,100,-2.780987128,-0.385,0,0,0,0,44
101,9,14431,"KOSTMAYER, Peter Houston",PA,14,8,100,-2.697580917,-0.298,0,1,0,0,60
101,9,14432,"LEACH, James Albert Smith",IA,31,1,200,-0.50640059,0.141,0,1,0,0,44
101,9,14435,"MARKEY, Edward John",MA,3,7,100,-3.862338039,-0.5,0,0,0,1,45
101,9,14437,"MARLENEE, Ronald Charles",MT,64,2,200,2.875361133,0.393,0,0,0,0,54
101,9,14441,"MURPHY, Austin John",PA,14,22,100,-1.32014648,-0.081,0,0,0,1,35
101,9,14443,"OAKAR, Mary Rose",OH,24,20,100,-2.846664652,-0.4,0,0,1,0,42
101,9,14444,"PANETTA, Leon Edward",CA,71,16,100,-2.699035976,-0.258,0,0,0,1,44
101,9,14445,"PEASE, Donald James",OH,24,13,100,-1.839966349,-0.308,0,0,0,1,53
101,9,14446,"PURSELL, Carl Duane",MI,23,2,200,0.636847684,0.12,0,0,0,1,58
101,9,14448,"RAHALL, Nick Joe, II",WV,56,4,100,-1.682116082,-0.306,0,0,0,0,42
101,9,14451,"SKELTON, Isaac Newton, IV (Ike)",MO,34,4,100,0.145182065,-0.172,1,0,0,0,59
101,9,14454,"STUMP, Robert Lee",AZ,61,3,200,5.390789611,0.703,1,0,0,1,64
101,9,14458,"VENTO, Bruce Frank",MN,33,4,100,-2.990333269,-0.472,0,0,0,0,38
101,9,14459,"VOLKMER, Harold Lee",MO,34,9,100,-0.524817609,-0.196,0,0,0,1,54
101,9,14460,"WALGREN, Douglas",PA,14,18,100,-2.4056448,-0.247,0,0,0,0,53
101,9,14461,"WALKER, Robert Smith",PA,14,16,200,3.524714744,0.581,0,0,0,1,69
101,9,14462,"WATKINS, Wesley Wade",OK,53,3,100,0.352036718,-0.126,0,0,0,1,50
101,9,14463,"WEISS, Theodore S.",NY,13,17,100,-3.985974019,-0.564,0,1,0,1,21
101,9,14466,"STANGELAND, Arlan Ingehart",MN,33,7,200,1.94294051,0.346,0,0,0,0,51
101,9,14469,"LIVINGSTON, Robert Linlithgow, Jr.",LA,45,1,200,2.559009386,0.326,0,0,0,1,70
101,9,14470,"GARCIA, Robert",NY,13,18,100,-3.421502251,-0.559,0,0,0,1,12
101,9,14470,"GARCIA, Robert",NY,13,18,100,-3.421502251,-0.559,0,0,0,1,12
101,9,14471,"GREEN, Sedgwick William (Bill)",NY,13,15,200,-0.55767774,-0.044,0,0,0,1,33
101,9,14601,"ANTHONY, Beryl Franklin, Jr.",AR,42,4,100,-1.076841493,-0.254,0,0,0,0,52
101,9,14605,"BEREUTER, Douglas Kent",NE,35,1,200,1.002548921,0.231,0,1,0,1,56
101,9,14608,"BYRON, Beverly Barton Butcher",MD,52,6,100,0.321237782,-0.024,1,0,1,0,65
101,9,14612,"CLINGER, William Floyd, Jr.",PA,14,23,200,1.311140435,0.176,0,0,0,1,56
101,9,14613,"COELHO, Tony",CA,71,15,100,-2.166286151,-0.413,0,0,0,0,52
101,9,14613,"COELHO, Tony",CA,71,15,100,-2.166286151,-0.413,0,0,0,0,52
101,9,14614,"COURTER, James Andrew",NJ,12,12,200,1.49071229,0.269,1,0,0,0,62
101,9,14616,"DANNEMEYER, William Edwin",CA,71,39,200,4.139658512,0.691,0,0,0,1,71
101,9,14618,"DAVIS, Robert William",MI,23,11,200,1.149354901,0.098,1,0,0,0,52
101,9,14620,"DIXON, Julian Carey",CA,71,28,100,-2.482265136,-0.458,0,0,0,1,26
101,9,14621,"DONNELLY, Brian Joseph",MA,3,11,100,-1.596690625,-0.291,0,0,0,0,47
101,9,14624,"FAZIO, Victor Herbert, Jr.",CA,71,4,100,-1.89719543,-0.455,0,0,0,0,51
101,9,14626,"FROST, Jonas Martin",TX,49,24,100,-1.60803915,-0.316,0,0,0,1,47
101,9,14627,"GINGRICH, Newton Leroy",GA,44,6,200,2.397818437,0.377,0,0,0,0,67
101,9,14629,"GRAY, William Herbert, III",PA,14,2,100,-2.683361489,-0.511,0,0,0,0,8
101,9,14631,"GUARINI, Frank Joseph, Jr.",NJ,12,14,100,-1.295613099,-0.295,0,0,0,1,44
101,9,14632,"HALL, Tony Patrick",OH,24,3,100,-1.749075672,-0.28,0,0,0,0,54
101,9,14635,"HOPKINS, Larry Jones",KY,51,6,200,1.895475282,0.347,1,0,0,1,57
101,9,14636,"HUTTO, Earl Dewitt",FL,43,1,100,0.685870541,-0.007,1,0,0,1,73
101,9,14641,"LEATH, James Marvin",TX,49,11,100,0.021724681,0.049,1,0,0,1,58
101,9,14643,"LELAND, George Thomas (Mickey)",TX,49,18,100,-4.420560424,-0.596,0,0,0,0,25
101,9,14643,"LELAND, George Thomas (Mickey)",TX,49,18,100,-4.420560424,-0.596,0,0,0,0,25
101,9,14644,"LEWIS, Charles Jeremy (Jerry)",CA,71,35,200,2.17679653,0.348,0,0,0,0,65
101,9,14649,"MATSUI, Robert T.",CA,71,3,100,-2.343118018,-0.404,0,0,0,0,50
101,9,14650,"MAVROULES, Nicholas James",MA,3,6,100,-1.730696647,-0.342,1,0,0,0,48
101,9,14651,"NELSON, Clarence William (Bill)",FL,43,11,100,-0.441660696,-0.192,0,0,0,1,70
101,9,14652,"PASHAYAN, Charles, Jr.",CA,71,17,200,1.200806979,0.282,0,0,0,1,59
101,9,14654,"RITTER, Donald Lawrence",PA,14,15,200,1.879078805,0.268,0,0,0,0,55
101,9,14655,"ROTH, Toby A.",WI,25,8,200,1.291914433,0.351,0,1,0,1,53
101,9,14656,"SABO, Martin Olav",MN,33,5,100,-2.937924394,-0.516,0,0,0,0,33
101,9,14657,"SENSENBRENNER, Frank James, Jr.",WI,25,9,200,1.345449856,0.646,0,0,0,0,60
101,9,14660,"SHUMWAY, Norman David",CA,71,14,200,3.631189274,0.556,0,0,0,0,59
101,9,14661,"SNOWE, Olympia Jean",ME,2,2,200,0.01028909,0.091,0,1,1,0,55
101,9,14662,"SOLOMON, Gerald Brooks Hunt",NY,13,24,200,2.132368872,0.492,0,0,0,1,58
101,9,14664,"STENHOLM, Charles Walter",TX,49,17,100,0.463383588,0.019,0,0,0,0,58
101,9,14666,"SWIFT, Allan Byron",WA,73,2,100,-2.500996722,-0.43,0,0,0,0,49
101,9,14667,"SYNAR, Michael Lynn",OK,53,2,100,-2.397910777,-0.321,0,0,0,0,53
101,9,14668,"TAUKE, Thomas Joseph",IA,31,2,200,0.585717107,0.27,0,0,0,0,43
101,9,14669,"THOMAS, William Marshall",CA,71,20,200,1.691456548,0.371,0,0,0,0,65
101,9,14670,"WHITTAKER, Robert Russell",KS,32,5,200,2.251941758,0.346,0,0,0,0,56
101,9,14672,"WILLIAMS, John Patrick",MT,64,1,100,-2.132283361,-0.315,0,0,0,1,50
101,9,14673,"WOLPE, Howard Eliot, III",MI,23,3,100,-3.158121037,-0.374,0,1,0,0,54
101,9,14675,"PETRI, Thomas Evert",WI,25,6,200,1.193441997,0.379,0,0,0,0,54
101,9,14677,"PORTER, John Edward",IL,21,10,200,0.400826744,0.217,0,0,0,1,62
101,9,14679,"TAUZIN, Wilbert Joseph (Billy)",LA,45,3,100,0.685175603,0.03,0,0,0,0,54
101,9,14681,"CROCKETT, George William, Jr.",MI,23,13,100,-2.86130807,-0.651,0,1,0,0,14
101,9,14802,"BLILEY, Thomas Jerome, Jr.",VA,40,3,200,2.466429951,0.382,0,0,0,1,63
101,9,14803,"BROWN, George Hanks (Hank)",CO,62,4,200,1.353808138,0.511,0,0,0,1,55
101,9,14808,"COYNE, William Joseph",PA,14,14,100,-3.029760324,-0.494,0,0,0,1,26
101,9,14809,"CRAIG, Larry Edwin",ID,63,1,200,3.078342759,0.494,0,0,0,0,59
101,9,14812,"DORGAN, Byron Leslie",ND,36,1,100,-2.439335136,-0.267,0,0,0,0,56
101,9,14813,"DREIER, David Timothy",CA,71,33,200,2.940033974,0.478,0,0,0,0,62
101,9,14815,"DWYER, Bernard James",NJ,12,6,100,-1.682635025,-0.373,0,0,0,1,53
101,9,14816,"DYMALLY, Mervyn Malcolm",CA,71,31,100,-4.016435084,-0.685,0,1,0,0,34
101,9,14817,"DYSON, Royden Patrick",MD,52,1,100,-0.350858755,-0.104,1,0,0,0,63
101,9,14818,"ECKART, Dennis Edward",OH,24,11,100,-1.799381643,-0.242,0,0,0,0,55
101,9,14819,"EMERSON, Norvell William (Bill)",MO,34,8,200,1.176152188,0.332,0,0,0,1,55
101,9,14822,"FIELDS, Jack Milton, Jr.",TX,49,8,200,3.561437401,0.541,0,0,0,0,54
101,9,14823,"FOGLIETTA, Thomas Michael",PA,14,1,100,-2.790852206,-0.506,1,0,0,0,33
101,9,14824,"FRANK, Barney",MA,3,4,100,-3.423187753,-0.499,0,0,0,0,42
101,9,14825,"GEJDENSON, Samuel",CT,1,2,100,-2.981426572,-0.416,0,1,0,0,50
101,9,14827,"GUNDERSON, Steven Craig",WI,25,3,200,1.076096226,0.203,0,0,0,0,47
101,9,14828,"HALL, Ralph Moody",TX,49,4,100,1.048248479,0.096,0,0,0,1,61
101,9,14829,"HANSEN, James Vear",UT,67,1,200,3.739050345,0.496,1,0,0,1,72
101,9,14831,"HATCHER, Charles Floyd",GA,44,2,100,-0.214725012,-0.202,0,0,0,1,58
101,9,14833,"HERTEL, Dennis Mark",MI,23,14,100,-2.53118966,-0.345,1,0,0,0,55
101,9,14834,"HILER, John Patrick",IN,22,3,200,2.756557886,0.413,0,0,0,0,59
101,9,14835,"HUNTER, Duncan Lee",CA,71,45,200,2.219843772,0.47,1,0,0,1,66
101,9,14837,"LANTOS, Thomas Peter",CA,71,11,100,-1.458472576,-0.376,0,1,0,0,41
101,9,14839,"LOWERY, William David",CA,71,41,200,2.246596273,0.33,0,0,0,0,58
101,9,14840,"MARTIN, David O'Brien",NY,13,26,200,2.150888727,0.232,1,0,0,1,55
101,9,14841,"MARTIN, Lynn Morley",IL,21,16,200,1.055256045,0.345,0,0,1,0,57
101,9,14842,"McCOLLUM, Ira William, Jr. (Bill)",FL,43,5,200,3.006913926,0.377,0,0,0,1,68
101,9,14843,"McCURDY, David Keith",OK,53,4,100,-0.208634026,-0.112,1,0,0,0,58
101,9,14844,"McEWEN, Bob",OH,24,6,200,2.178574574,0.359,0,0,0,0,64
101,9,14845,"McGRATH, Raymond Joseph",NY,13,5,200,0.723124164,0.185,0,0,0,0,56
101,9,14846,"MOLINARI, Guy Victor",NY,13,14,200,1.008130152,0.255,0,0,0,1,61
101,9,14846,"MOLINARI, Guy Victor",NY,13,14,200,1.008130152,0.255,0,0,0,1,61
101,9,14847,"MORRISON, Sidney Wallace",WA,73,4,200,0.463767033,0.153,0,0,0,1,57
101,9,14852,"ROBERTS, Charles Patrick (Pat)",KS,32,1,200,1.843189419,0.415,0,0,0,1,60
101,9,14854,"ROGERS, Harold Dallas (Hal)",KY,51,5,200,1.830895644,0.331,0,0,0,1,66
101,9,14855,"ROUKEMA, Margaret Scafati",NJ,12,5,200,0.239735674,0.162,0,0,1,0,66
101,9,14856,"SAVAGE, Gus",IL,21,2,100,-2.729395691,-0.671,0,0,0,1,15
101,9,14857,"SCHNEIDER, Claudine",RI,5,2,200,-0.766224744,-0.026,0,0,1,0,46
101,9,14858,"SCHUMER, Charles Ellis (Chuck)",NY,13,10,100,-2.718679356,-0.35,0,0,0,0,43
101,9,14860,"SHAW, Eugene Clay, Jr.",FL,43,15,200,2.112535827,0.3,0,0,0,0,53
101,9,14861,"SKEEN, Joseph Richard",NM,66,2,200,1.911912645,0.301,0,0,0,1,58
101,9,14863,"SMITH, Christopher Henry",NJ,12,4,200,0.242438617,0.158,0,1,0,0,55
101,9,14864,"SMITH, Dennis Alan (Denny)",OR,72,5,200,2.359428258,0.603,0,0,0,1,50
101,9,14868,"WEBER, John Vincent (Vin)",MN,33,2,200,1.533607325,0.381,0,0,0,0,51
101,9,14869,"WOLF, Frank Rudolph",VA,40,10,200,1.805164609,0.284,0,0,0,1,57
101,9,14871,"WYDEN, Ronald Lee",OR,72,3,100,-2.942332629,-0.314,0,0,0,0,38
101,9,14873,"HOYER, Steny Hamilton",MD,52,5,100,-1.786914282,-0.379,0,0,0,0,40
101,9,14875,"OXLEY, Michael Garver",OH,24,4,200,2.204479032,0.382,0,0,0,0,67
101,9,14877,"KENNELLY, Barbara Bailey",CT,1,1,100,-2.189870228,-0.346,0,0,1,0,44
101,9,14879,"MART̍NEZ, Matthew G.",CA,71,30,100,-1.917582008,-0.341,0,0,0,1,46
101,9,15000,"ACKERMAN, Gary Leonard",NY,13,7,100,-3.477896635,-0.429,0,0,0,0,39
101,9,15001,"ANDREWS, Michael Allen",TX,49,25,100,-0.539042248,-0.135,0,0,0,0,48
101,9,15002,"BARTLETT, Harry Stephen (Steve)",TX,49,3,200,1.907469686,0.46,1,0,0,0,74
101,9,15003,"BATEMAN, Herbert Harvell",VA,40,1,200,2.029645142,0.242,0,0,0,1,60
101,9,15004,"BATES, Jim",CA,71,44,100,-4.101810858,-0.279,0,1,0,1,47
101,9,15005,"BERMAN, Howard Lawrence",CA,71,26,100,-2.462054473,-0.404,0,0,0,0,44
101,9,15006,"BILIRAKIS, Michael",FL,43,9,200,2.851962392,0.382,0,0,0,1,60
101,9,15007,"BOEHLERT, Sherwood Louis",NY,13,25,200,-0.186738771,0.103,0,0,0,1,54
101,9,15008,"BORSKI, Robert Anthony, Jr.",PA,14,3,100,-1.934100689,-0.416,0,1,0,0,51
101,9,15009,"BOSCO, Douglas Harry",CA,71,1,100,-1.962795825,-0.271,0,0,0,0,43
101,9,15010,"BOUCHER, Frederick C.",VA,40,9,100,-2.060904315,-0.265,0,0,0,0,54
101,9,15011,"BOXER, Barbara",CA,71,6,100,-3.824000138,-0.45,0,0,1,0,35
101,9,15013,"BRYANT, John Wiley",TX,49,5,100,-1.554702168,-0.358,0,1,0,0,49
101,9,15014,"BURTON, Danny Lee",IN,22,6,200,3.564842182,0.585,0,0,0,1,69
101,9,15015,"CARPER, Thomas Richard",DE,11,1,100,-1.46335685,-0.174,0,0,0,1,56
101,9,15016,"CHANDLER, Rodney Dennis",WA,73,8,200,0.773186869,0.254,0,1,0,0,56
101,9,15017,"CLARKE, James McClure",NC,47,11,100,-1.247583894,-0.204,0,0,0,1,59
101,9,15018,"COLEMAN, Ronald D'Emory",TX,49,16,100,-1.48389576,-0.402,0,0,0,1,47
101,9,15019,"COOPER, James Hayes Shofner",TN,54,4,100,-0.597463709,-0.162,0,1,0,0,57
101,9,15020,"DeWINE, Michael",OH,24,7,200,2.300479527,0.289,0,0,0,0,64
101,9,15021,"DURBIN, Richard Joseph",IL,21,20,100,-3.168752967,-0.365,0,0,0,0,51
101,9,15022,"ERDREICH, Ben",AL,41,6,100,0.009508951,-0.06,1,0,0,1,57
101,9,15023,"EVANS, Lane Allen",IL,21,17,100,-3.791439545,-0.454,0,1,0,1,47
101,9,15024,"FEIGHAN, Edward Farrell",OH,24,19,100,-2.798242209,-0.304,0,0,0,0,55
101,9,15026,"GEKAS, George William",PA,14,17,200,2.807501866,0.426,0,0,0,1,63
101,9,15028,"JOHNSON, Nancy Lee",CT,1,6,200,0.46986804,0.122,0,0,1,0,53
101,9,15029,"KAPTUR, Marcia Carolyn (Marcy)",OH,24,9,100,-1.759015782,-0.349,1,0,1,0,46
101,9,15030,"KASICH, John Richard",OH,24,12,200,1.790219721,0.314,0,0,0,0,61
101,9,15031,"KOLTER, Joseph Paul",PA,14,4,100,-1.127559506,-0.28,0,0,0,1,45
101,9,15032,"LEHMAN, Richard Henry",CA,71,18,100,-2.475160718,-0.27,0,0,0,0,46
101,9,15033,"LEVIN, Sander Martin",MI,23,17,100,-2.387024477,-0.377,0,1,0,0,46
101,9,15034,"LEVINE, Meldon Edises",CA,71,27,100,-2.517249232,-0.436,0,0,0,0,44
101,9,15035,"LEWIS, Thomas F.",FL,43,12,200,3.024264888,0.387,0,0,0,1,64
101,9,15036,"LIPINSKI, William Oliver",IL,21,5,100,-0.580399056,-0.176,0,0,0,1,51
101,9,15040,"McCANDLESS, Alfred A.",CA,71,37,200,3.306638559,0.474,1,1,0,1,61
101,9,15041,"McCLOSKEY, Francis Xavier",IN,22,8,100,-2.169261207,-0.336,0,0,0,1,57
101,9,15044,"MOODY, Jim",WI,25,5,100,-2.260705613,-0.347,0,0,0,0,35
101,9,15045,"MORRISON, Bruce Andrew",CT,1,3,100,-3.225534208,-0.396,0,0,0,0,50
101,9,15046,"MRAZEK, Robert Jan",NY,13,3,100,-2.630219695,-0.349,0,0,0,1,59
101,9,15047,"NIELSON, Howard Curtis",UT,67,3,200,2.624808477,0.505,0,0,0,1,69
101,9,15048,"OLIN, James R.",VA,40,6,100,-1.487214421,-0.119,0,0,0,1,61
101,9,15049,"ORTIZ, Solomon P.",TX,49,27,100,-0.774846824,-0.272,1,0,0,1,46
101,9,15050,"OWENS, Major Robert Odell",NY,13,12,100,-3.954077055,-0.569,0,0,0,0,9
101,9,15051,"PACKARD, Ronald C.",CA,71,43,200,3.161535946,0.419,0,0,0,1,68
101,9,15052,"PENNY, Timothy Joseph",MN,33,1,100,-0.951562009,-0.051,0,0,0,0,51
101,9,15053,"RAY, Richard Belmont",GA,44,3,100,0.425776819,0.035,1,0,0,1,57
101,9,15055,"RICHARDSON, Bill",NM,66,3,100,-0.993512856,-0.321,0,0,0,0,44
101,9,15056,"RIDGE, Thomas Joseph",PA,14,21,200,0.525004518,0.186,0,0,0,1,49
101,9,15057,"ROWLAND, James Roy, Jr.",GA,44,8,100,-0.199662024,-0.127,0,0,0,1,54
101,9,15058,"SCHAEFER, Daniel",CO,62,6,200,1.902601028,0.479,0,0,0,1,57
101,9,15059,"SIKORSKI, Gerald Edward",MN,33,6,100,-2.460516753,-0.217,1,0,0,0,48
101,9,15060,"SISISKY, Norman",VA,40,4,100,-0.147622947,-0.122,0,0,0,1,55
101,9,15061,"SLATTERY, James Charles",KS,32,2,100,-0.93797952,-0.099,0,0,0,0,53
101,9,15062,"SMITH, Lawrence Jack",FL,43,16,100,-1.618640434,-0.355,0,1,0,0,55
101,9,15063,"SMITH, Robert Freeman",OR,72,2,200,1.987348714,0.396,1,0,0,0,54
101,9,15064,"SPRATT, John McKee, Jr.",SC,48,5,100,-1.092988946,-0.256,0,0,0,1,60
101,9,15065,"STAGGERS, Harley Orrin, Jr.",WV,56,2,100,-1.762756644,-0.315,0,0,0,0,51
101,9,15066,"SUNDQUIST, Donald Kenneth",TN,54,7,200,1.971729998,0.371,0,0,0,1,67
101,9,15068,"TALLON, Robert Mooneyhan, Jr. (Robin)",SC,48,6,100,0.131775065,-0.1,0,0,0,0,56
101,9,15069,"THOMAS, Robert Lindsay",GA,44,1,100,0.040494871,-0.14,0,0,0,0,60
101,9,15070,"TORRES, Esteban Edward",CA,71,34,100,-2.908571231,-0.487,0,1,0,1,49
101,9,15071,"TORRICELLI, Robert Guy",NJ,12,9,100,-1.519375323,-0.262,0,0,0,0,53
101,9,15072,"TOWNS, Edolphus",NY,13,11,100,-4.435695421,-0.519,0,0,0,1,16
101,9,15073,"VALENTINE, Itimous Thaddeus, Jr., (Tim)",NC,47,2,100,-0.461163238,-0.084,0,0,0,1,49
101,9,15075,"VUCANOVICH, Barbara Farrell",NV,65,2,200,3.18903454,0.441,0,0,1,0,62
101,9,15076,"WHEAT, Alan Dupree",MO,34,5,100,-3.933947721,-0.465,0,0,0,0,39
101,9,15077,"WISE, Robert Ellsworth, Jr.",WV,56,3,100,-1.773817474,-0.32,0,0,0,0,47
101,9,15079,"HAYES, Charles Arthur",IL,21,1,100,-4.498465082,-0.656,0,0,0,0,4
101,9,15081,"DARDEN, George (Buddy)",GA,44,7,100,-0.213872498,-0.161,0,0,0,0,70
101,9,15082,"KLECZKA, Gerald Daniel",WI,25,4,100,-2.221598278,-0.322,0,0,0,1,43
101,9,15083,"MOLLOHAN, Alan Bowlby",WV,56,1,100,-0.353650082,-0.292,0,0,0,1,48
101,9,15084,"ATKINS, Chester Greenough",MA,3,5,100,-2.952791094,-0.407,1,0,0,0,47
101,9,15085,"BARTON, Joe Linus",TX,49,6,200,2.71261836,0.528,0,0,0,0,62
101,9,15086,"BENTLEY, Helen Delich",MD,52,2,200,1.489161239,0.276,0,0,1,0,62
101,9,15088,"BRUCE, Terry Lee",IL,21,19,100,-2.537363741,-0.268,0,0,0,0,54
101,9,15089,"BUSTAMANTE, Albert G.",TX,49,23,100,-1.337589607,-0.392,1,0,0,1,50
101,9,15090,"CALLAHAN, Herbert Leon (Sonny)",AL,41,1,200,2.309112497,0.373,0,0,0,1,62
101,9,15092,"COBLE, Howard",NC,47,6,200,1.664090132,0.52,0,0,0,1,61
101,9,15093,"COMBEST, Larry Ed",TX,49,19,200,4.059397492,0.458,0,0,0,0,67
101,9,15094,"DeLAY, Thomas Dale",TX,49,22,200,4.031798438,0.593,0,0,0,0,62
101,9,15098,"FAWELL, Harris W.",IL,21,13,200,1.65329886,0.332,0,0,0,0,68
101,9,15099,"GALLO, Dean Anderson",NJ,12,11,200,1.148130729,0.203,0,0,0,0,64
101,9,15100,"GORDON, Barton Jennings",TN,54,6,100,-1.479586544,-0.204,0,0,0,1,60
101,9,15103,"HENRY, Paul B.",MI,23,5,200,0.717121689,0.264,0,0,0,0,64
101,9,15104,"KANJORSKI, Paul E.",PA,14,11,100,-1.47910324,-0.303,0,0,0,1,52
101,9,15105,"KOLBE, James Thomas",AZ,61,5,200,1.571883683,0.351,0,0,0,1,55
101,9,15106,"LIGHTFOOT, James Ross",IA,31,5,200,2.417011853,0.391,0,0,0,1,47
101,9,15107,"MANTON, Thomas J.",NY,13,9,100,-1.595146213,-0.361,0,0,0,1,48
101,9,15108,"McMILLAN, John Alexander, III (Alex)",NC,47,9,200,1.376375122,0.294,0,0,0,1,61
101,9,15109,"MEYERS, Jan",KS,32,3,200,0.852102912,0.208,0,0,1,0,54
101,9,15110,"MILLER, John Ripin",WA,73,1,200,0.296811127,0.168,0,0,0,0,49
101,9,15112,"SAXTON, Hugh James",NJ,12,13,200,1.036516854,0.238,0,0,0,0,61
101,9,15114,"SCHUETTE, Bill",MI,23,10,200,1.625748715,0.28,0,0,0,0,58
101,9,15115,"SLAUGHTER, Daniel French, Jr.",VA,40,7,200,2.63235008,0.38,0,0,0,1,66
101,9,15116,"SMITH, Robert C.",NH,4,1,200,2.989044889,0.623,1,0,0,1,64
101,9,15117,"STALLINGS, Richard Howard",ID,63,2,100,-0.631633826,-0.084,0,0,0,0,65
101,9,15121,"TRAFICANT, James A., Jr.",OH,24,17,100,-1.52772143,-0.082,0,0,0,0,38
101,9,15123,"ROWLAND, John",CT,1,5,200,0.888734156,0.169,1,0,0,0,58
101,9,15124,"VISCLOSKY, Peter",IN,22,1,100,-1.852239363,-0.402,0,0,0,0,41
101,9,15125,"ARMEY, Richard Keith",TX,49,26,200,3.273661462,0.635,0,0,0,0,68
101,9,15129,"CHAPMAN, Jim",TX,49,1,100,-0.282107774,-0.198,0,0,0,0,52
101,9,15171,"PATTERSON, Elizabeth J.",SC,48,4,100,-0.158281139,-0.055,0,0,1,0,67
101,9,15228,"PERKINS, Carl Christopher",KY,51,7,100,-1.899591523,-0.56,0,0,0,0,44
101,9,15401,"BAKER, Richard Hugh",LA,45,6,200,2.220928216,0.423,0,0,0,0,60
101,9,15402,"BALLENGER, Cass",NC,47,10,200,2.623519732,0.464,1,0,0,1,65
101,9,15403,"BILBRAY, James Hubert",NV,65,1,100,-0.766555818,-0.184,1,0,0,0,56
101,9,15404,"BRENNAN, Joseph Edward",ME,2,1,100,-2.778389636,-0.308,0,0,0,0,56
101,9,15405,"BUECHNER, John William (Jack)",MO,34,2,200,1.21984422,0.33,0,0,0,0,61
101,9,15406,"BUNNING, James Paul David",KY,51,4,200,3.506155939,0.521,0,0,0,0,65
101,9,15407,"CAMPBELL, Ben Nighthorse",CO,62,3,100,-0.8383195,-0.141,0,0,0,1,52
101,9,15408,"CARDIN, Benjamin Louis",MD,52,3,100,-2.269753475,-0.329,0,0,0,0,45
101,9,15410,"DeFAZIO, Peter Anthony",OR,72,4,100,-3.381087896,-0.428,0,0,0,1,44
101,9,15411,"ESPY, Alphonso Michael (Mike)",MS,46,2,100,-2.193429363,-0.386,0,0,0,0,48
101,9,15412,"FLAKE, Floyd Harold",NY,13,6,100,-3.844604494,-0.455,0,1,0,0,27
101,9,15413,"GALLEGLY, Elton W.",CA,71,21,200,2.633157593,0.402,0,0,0,0,64
101,9,15414,"GRANDY, Frederick Lawrence",IA,31,6,200,0.876338023,0.283,0,0,0,0,50
101,9,15415,"GRANT, James William",FL,43,2,200,1.50210834,0.219,0,0,0,0,59
101,9,15416,"HARRIS, Claude, Jr.",AL,41,7,100,0.135043803,-0.085,0,0,0,0,59
101,9,15417,"HASTERT, John Dennis",IL,21,14,200,2.215544525,0.443,0,0,0,0,64
101,9,15418,"HAYES, James Allison",LA,45,7,100,0.022677601,-0.057,1,0,0,0,49
101,9,15419,"HEFLEY, Joel M.",CO,62,5,200,2.43394732,0.591,0,0,0,0,67
101,9,15420,"HERGER, Walter William (Wally)",CA,71,2,200,3.003360927,0.551,1,0,0,0,58
101,9,15421,"HOCHBRUECKNER, George Joseph",NY,13,1,100,-1.972969491,-0.348,0,0,0,1,60
101,9,15422,"HOLLOWAY, Clyde Cecil",LA,45,8,200,2.531392683,0.475,0,1,0,0,45
101,9,15423,"HOUGHTON, Amory, Jr.",NY,13,34,200,0.784422275,0.154,0,0,0,1,59
101,9,15424,"INHOFE, James Mountain",OK,53,1,200,3.122695541,0.551,0,0,0,0,61
101,9,15425,"JOHNSON, Timothy Peter (Tim)",SD,37,1,100,-2.059642206,-0.25,0,0,0,0,53
101,9,15426,"JONTZ, James Prather",IN,22,5,100,-2.570536833,-0.357,0,0,0,0,65
101,9,15427,"KENNEDY, Joseph Patrick, II",MA,3,8,100,-3.50534118,-0.413,0,0,0,0,33
101,9,15429,"KYL, Jon Llewellyn",AZ,61,4,200,3.655585002,0.548,1,0,0,0,65
101,9,15429,"KYL, Jon Llewellyn",AZ,61,4,200,3.655585002,0.548,1,0,0,0,65
101,9,15429,"KYL, Jon Llewellyn",AZ,61,4,200,3.655585002,0.548,1,0,0,0,65
101,9,15429,"KYL, Jon Llewellyn",AZ,61,4,200,3.655585002,0.548,1,0,0,0,65
101,9,15430,"LANCASTER, H. Martin",NC,47,3,100,-0.28835582,-0.134,0,0,0,1,58
101,9,15431,"LEWIS, John R.",GA,44,5,100,-4.365948674,-0.588,0,0,0,0,31
101,9,15432,"McMILLEN, Charles Thomas",MD,52,4,100,-1.191800278,-0.214,0,0,0,0,57
101,9,15432,"McMILLEN, Charles Thomas",MD,52,4,100,-1.191800278,-0.214,0,0,0,0,57
101,9,15432,"McMILLEN, Charles Thomas",MD,52,4,100,-1.191800278,-0.214,0,0,0,0,57
101,9,15432,"McMILLEN, Charles Thomas",MD,52,4,100,-1.191800278,-0.214,0,0,0,0,57
101,9,15433,"MFUME, Kweisi",MD,52,7,100,-3.009947803,-0.446,0,0,0,0,17
101,9,15434,"MORELLA, Constance A.",MD,52,8,200,-0.932169718,-0.018,0,0,1,0,46
101,9,15435,"NAGLE, David Ray",IA,31,3,100,-1.791087414,-0.349,0,0,0,0,43
101,9,15437,"PICKETT, Owen Bradford",VA,40,2,100,-0.388495957,-0.149,1,0,0,0,59
101,9,15438,"PRICE, David Eugene",NC,47,4,100,-1.363917718,-0.339,1,0,0,0,55
101,9,15439,"RAVENEL, Arthur, Jr.",SC,48,1,200,1.003332846,0.162,0,0,0,1,61
101,9,15440,"RHODES, John Jacob, III",AZ,61,1,200,2.253665837,0.407,0,0,0,1,65
101,9,15441,"SAIKI, Patricia",HI,82,1,200,0.050962332,0.096,0,0,1,0,45
101,9,15442,"SAWYER, Thomas Charles",OH,24,14,100,-2.464351578,-0.377,0,0,0,0,47
101,9,15443,"SKAGGS, David Evans",CO,62,2,100,-2.527326432,-0.355,0,0,0,1,48
101,9,15444,"SLAUGHTER, Louise McIntosh",NY,13,30,100,-2.573031444,-0.464,0,0,1,0,54
101,9,15445,"SMITH, Lamar Seeligson",TX,49,21,200,2.112101924,0.423,0,0,0,0,70
101,9,15446,"UPTON, Frederick Stephen",MI,23,4,200,1.277709733,0.339,1,0,0,0,63
101,9,15447,"WELDON, Wayne Curtis (Curt)",PA,14,7,200,0.832779209,0.232,0,0,0,0,60
101,9,15448,"PELOSI, Nancy",CA,71,5,100,-3.944628358,-0.493,0,0,1,0,28
101,9,15449,"SHAYS, Christopher H.",CT,1,4,200,-0.440030455,0.129,0,0,0,0,57
101,9,15450,"CLEMENT, Robert Nelson",TN,54,5,100,-1.338051264,-0.216,1,0,0,1,52
101,9,15451,"McCRERY, James O., III",LA,45,4,200,2.275835948,0.362,0,0,0,0,59
101,9,15452,"PAYNE, Lewis Franklin, Jr.",VA,40,5,100,-0.444797718,-0.148,0,0,0,1,62
101,9,15453,"COSTELLO, Jerry Francis",IL,21,21,100,-1.473203803,-0.317,0,0,0,0,45
101,9,15454,"PALLONE, Frank, Jr.",NJ,12,3,100,-1.111205068,-0.398,0,0,0,0,62
101,9,15455,"DUNCAN, John J., Jr.",TN,54,2,200,1.849556545,0.598,0,0,0,1,64
101,9,15600,"CAMPBELL, Thomas J.",CA,71,12,200,0.043315021,0.256,0,0,0,0,49
101,9,15601,"COX, Charles Christopher",CA,71,40,200,2.731956403,0.54,0,0,0,0,68
101,9,15602,"DOUGLAS, Charles Gywnne, III",NH,4,2,200,2.036216047,0.525,0,0,0,1,61
101,9,15603,"ENGEL, Eliot Lance",NY,13,19,100,-2.713908565,-0.407,0,0,0,0,45
101,9,15604,"GILLMOR, Paul Eugene",OH,24,5,200,1.649719706,0.254,0,0,0,1,61
101,9,15605,"GOSS, Porter J.",FL,43,13,200,2.597356156,0.421,0,1,0,1,68
101,9,15605,"GOSS, Porter J.",FL,43,13,200,2.597356156,0.421,0,1,0,1,68
101,9,15606,"HANCOCK, Melton D. (Mel)",MO,34,7,200,4.762178585,0.79,0,0,0,1,61
101,9,15607,"HOAGLAND, Peter J.",NE,35,2,100,-1.012394873,-0.209,0,1,0,1,58
101,9,15608,"JAMES, Craig T.",FL,43,4,200,2.237439436,0.343,0,0,0,1,64
101,9,15609,"JOHNSTON, Harry A., II",FL,43,14,100,-1.326827165,-0.372,0,0,0,1,53
101,9,15611,"LAUGHLIN, Gregory H.",TX,49,14,100,-0.041446213,-0.097,0,1,0,1,57
101,9,15612,"LOWEY, Nita M.",NY,13,20,100,-2.87694997,-0.389,0,0,1,0,51
101,9,15613,"McDERMOTT, James A.",WA,73,7,100,-2.947559193,-0.666,0,0,0,1,32
101,9,15614,"McNULTY, Michael Robert",NY,13,23,100,-1.050705484,-0.369,0,0,0,0,43
101,9,15615,"MACHTLEY, Ronald K.",RI,5,1,200,-0.074824471,0.113,1,0,0,1,42
101,9,15616,"NEAL, Richard Edmund",MA,3,2,100,-2.277296746,-0.416,0,0,0,0,47
101,9,15617,"PARKER, Michael (Mike)",MS,46,4,100,0.469623952,0.034,1,0,0,0,57
101,9,15618,"PAXON, L. William",NY,13,31,200,2.454571182,0.472,0,0,0,0,56
101,9,15619,"PAYNE, Donald Milford",NJ,12,10,100,-3.923747553,-0.592,0,0,0,0,20
101,9,15620,"POSHARD, Glenn",IL,21,22,100,-1.908904221,-0.211,0,0,0,1,48
101,9,15621,"ROHRABACHER, Dana",CA,71,42,200,1.929689026,0.628,0,0,0,0,65
101,9,15622,"SANGMEISTER, George Edward",IL,21,4,100,-1.775126181,-0.226,0,1,0,1,55
101,9,15623,"SARPALIUS, William",TX,49,13,100,0.368147752,-0.078,0,0,0,0,63
101,9,15624,"SCHIFF, Steven Harvey",NM,66,1,200,1.34337178,0.196,0,0,0,1,54
101,9,15625,"SMITH, Larkin I.",MS,46,5,200,2.441794154,0.491,0,0,0,0,69
101,9,15625,"SMITH, Larkin I.",MS,46,5,200,2.441794154,0.491,0,0,0,0,69
101,9,15626,"SMITH, Peter P.",VT,6,1,200,-0.175896668,0.055,0,0,0,0,51
101,9,15627,"STEARNS, Clifford Bundy",FL,43,6,200,2.55324595,0.554,0,0,0,1,61
101,9,15628,"TANNER, John S.",TN,54,8,100,-0.55154523,-0.182,0,0,0,1,56
101,9,15629,"UNSOELD, Jolene",WA,73,3,100,-3.540135865,-0.52,0,0,1,0,47
101,9,15630,"WALSH, James T.",NY,13,27,200,0.480068623,0.208,0,0,0,0,52
101,9,15631,"LONG, Jill Lynette",IN,22,4,100,-1.59010191,-0.224,1,0,1,0,66
101,9,15631,"LONG, Jill Lynette",IN,22,4,100,-1.59010191,-0.224,1,0,1,0,66
101,9,15632,"BROWDER, John Glen",AL,41,3,100,0.120382876,-0.165,0,0,0,0,60
101,9,15632,"BROWDER, John Glen",AL,41,3,100,0.120382876,-0.165,0,0,0,0,60
101,9,15635,"CONDIT, Gary Adrian",CA,71,15,100,-1.333000743,-0.103,1,0,0,0,52
101,9,15635,"CONDIT, Gary Adrian",CA,71,15,100,-1.333000743,-0.103,1,0,0,0,52
101,9,15636,"GEREN, Preston M. (Pete)",TX,49,12,100,-0.131911434,-0.032,0,0,0,0,53
101,9,15636,"GEREN, Preston M. (Pete)",TX,49,12,100,-0.131911434,-0.032,0,0,0,0,53
101,9,15637,"TAYLOR, Gary Eugene (Gene)",MS,46,5,100,0.448904717,-0.045,1,1,0,1,69
101,9,15637,"TAYLOR, Gary Eugene (Gene)",MS,46,5,100,0.448904717,-0.045,1,1,0,1,69
101,9,15639,"MOLINARI, Susan",NY,13,14,200,1.314406789,0.256,0,0,1,0,61
101,9,15639,"MOLINARI, Susan",NY,13,14,200,1.314406789,0.256,0,0,1,0,61
101,9,29134,"SERRANO, Jos̩ E.",NY,13,18,100,-3.404418818,-0.488,0,0,0,1,12
101,9,29134,"SERRANO, Jos̩ E.",NY,13,18,100,-3.404418818,-0.488,0,0,0,1,12
101,9,29145,"WASHINGTON, Craig Anthony",TX,49,18,100,-3.32189343,-0.766,0,0,0,0,25
101,9,29145,"WASHINGTON, Craig Anthony",TX,49,18,100,-3.32189343,-0.766,0,0,0,0,25
101,9,95120,"JONES, Ben",GA,44,4,100,-1.062884145,-0.213,0,0,0,0,59
101,9,95122,"ROBINSON, Tommy Franklin",AR,42,2,200,1.729510167,0.257,0,0,0,1,56
102,10,633,"BENNETT, Charles Edward",FL,43,3,100,-0.720432552,-0.088,1,0,0,1,60
102,10,1077,"BROOKS, Jack Bascom",TX,49,9,100,-0.962657694,-0.407,0,0,0,1,47
102,10,1087,"BROOMFIELD, William S.",MI,23,18,200,1.801230662,0.227,0,1,0,0,70
102,10,2009,"CONTE, Silvio Ottavio",MA,3,1,200,-1.883951871,-0.023,0,0,0,1,41
102,10,2009,"CONTE, Silvio Ottavio",MA,3,1,200,-1.883951871,-0.023,0,0,0,1,41
102,10,2605,"DINGELL, John David, Jr.",MI,23,16,100,-1.590910194,-0.448,0,0,0,1,53
102,10,3078,"FASCELL, Dante Bruno",FL,43,19,100,-1.041894626,-0.4,0,1,0,1,72
102,10,6455,"MICHEL, Robert Henry",IL,21,18,200,2.219541138,0.372,0,0,0,1,55
102,10,6845,"NATCHER, William Huston",KY,51,2,100,-1.172928305,-0.288,0,0,0,1,58
102,10,8080,"ROSTENKOWSKI, Daniel David",IL,21,8,100,-1.450580605,-0.39,0,0,0,1,41
102,10,8672,"SMITH, Neal Edward",IA,31,4,100,-1.141385814,-0.313,0,0,0,1,41
102,10,10075,"WHITTEN, Jamie Lloyd",MS,46,1,100,-0.988923141,-0.161,0,0,0,0,59
102,10,10421,"YATES, Sidney Richard",IL,21,9,100,-3.993822225,-0.494,0,0,0,1,38
102,10,10520,"GONŹLEZ, Henry B.",TX,49,20,100,-2.267540754,-0.538,0,0,0,0,32
102,10,10573,"BROWN, George Edward, Jr.",CA,71,36,100,-2.11797798,-0.506,0,0,0,1,51
102,10,10583,"EDWARDS, William Donlon (Don)",CA,71,10,100,-3.484366658,-0.599,0,0,0,1,44
102,10,10588,"GIBBONS, Sam Melville",FL,43,7,100,-0.844929195,-0.233,0,0,0,1,58
102,10,10596,"HORTON, Frank Jefferson",NY,13,29,200,0.385760932,-0.004,0,0,0,1,53
102,10,10607,"McDADE, Joseph Michael",PA,14,10,200,0.81919523,0.093,0,0,0,0,58
102,10,10614,"PICKLE, James Jarrell (Jake)",TX,49,10,100,-0.884611277,-0.218,0,0,0,1,46
102,10,10616,"QUILLEN, James Henry",TN,54,1,200,1.333236197,0.246,0,0,0,1,68
102,10,10621,"ROYBAL, Edward R.",CA,71,25,100,-3.16473874,-0.61,0,0,0,1,32
102,10,10703,"ANNUNZIO, Frank",IL,21,11,100,-1.505369581,-0.398,0,0,0,0,53
102,10,10713,"CONYERS, John, Jr.",MI,23,1,100,-4.163008575,-0.658,0,0,0,1,11
102,10,10716,"de la GARZA, Eligio, II (Kika)",TX,49,15,100,-1.084908674,-0.255,0,0,0,1,37
102,10,10717,"DICKINSON, William Louis",AL,41,2,200,2.15742535,0.398,1,0,0,1,62
102,10,10726,"FOLEY, Thomas Stephen",WA,73,5,100,-2.610213325,-0.354,0,0,0,0,51
102,10,10727,"FORD, William David",MI,23,15,100,-2.708404361,-0.516,0,0,0,1,54
102,10,10732,"HAMILTON, Lee Herbert",IN,22,9,100,-1.240446598,-0.171,0,1,0,0,58
102,10,10742,"JACOBS, Andrew, Jr.",IN,22,10,100,-0.683381303,-0.07,0,0,0,1,48
102,10,10757,"MINK, Patsy Takemoto",HI,82,2,100,-3.754358783,-0.513,0,0,1,0,44
102,10,10768,"SCHEUER, James Haas",NY,13,8,100,-3.904000451,-0.478,0,0,0,1,40
102,10,10788,"JONES, Walter Beaman, Sr.",NC,47,1,100,-1.009855858,-0.259,0,0,0,0,54
102,10,10794,"VANDER JAGT, Guy Adrian",MI,23,9,200,2.227754085,0.247,0,0,0,0,62
102,10,11000,"BEVILL, Tom",AL,41,4,100,-0.347322446,-0.213,0,0,0,1,60
102,10,11020,"HAMMERSCHMIDT, John Paul",AR,42,3,200,2.210683254,0.253,0,0,0,1,66
102,10,11034,"MILLER, Clarence E.",OH,24,10,200,2.364159122,0.416,0,0,0,0,61
102,10,11035,"MONTGOMERY, Gillespie V. (Sonny)",MS,46,3,100,-0.095701174,0.017,1,0,0,1,66
102,10,11036,"MYERS, John Thomas",IN,22,7,200,1.208802321,0.236,0,0,0,1,63
102,10,11058,"WYLIE, Chalmers Pangburn",OH,24,15,200,2.564947158,0.23,0,0,0,1,62
102,10,11067,"GAYDOS, Joseph Matthew",PA,14,20,100,-0.494219889,-0.278,0,0,0,1,34
102,10,12000,"ALEXANDER, William Vollie (Bill), Jr.",AR,42,1,100,-1.275045395,-0.41,0,0,0,1,51
102,10,12001,"ANDERSON, Glenn Malcolm",CA,71,32,100,-0.932781299,-0.269,0,0,0,1,50
102,10,12009,"CLAY, William Lacy, Sr.",MO,34,1,100,-4.699465234,-0.49,0,0,0,1,27
102,10,12010,"COUGHLIN, Robert Lawrence",PA,14,13,200,1.067193077,0.204,0,0,0,1,56
102,10,12013,"FISH, Hamilton, Jr.",NY,13,21,200,0.6614935,0.07,0,0,0,1,61
102,10,12030,"STOKES, Louis",OH,24,21,100,-4.863154128,-0.578,0,0,0,1,19
102,10,12035,"YATRON, Gus",PA,14,6,100,-1.112487974,-0.174,0,1,0,0,61
102,10,12036,"OBEY, David Ross",WI,25,7,100,-2.91071086,-0.45,0,0,0,0,45
102,10,12041,"CRANE, Philip Miller",IL,21,12,200,4.664982171,0.739,0,0,0,1,70
102,10,12042,"ROE, Robert A.",NJ,12,8,100,-1.292660134,-0.326,0,0,0,1,53
102,10,13002,"ARCHER, William Reynolds, Jr.",TX,49,7,200,3.480771955,0.496,0,0,0,1,77
102,10,13003,"ASPIN, Leslie",WI,25,1,100,-1.067249883,-0.32,1,0,0,1,48
102,10,13011,"DELLUMS, Ronald V.",CA,71,8,100,-4.546811598,-0.644,1,0,0,1,29
102,10,13021,"LENT, Norman Frederick",NY,13,4,200,1.397588754,0.183,0,0,0,1,58
102,10,13024,"MAZZOLI, Romano Louis",KY,51,3,100,-1.332488985,-0.186,0,0,0,1,46
102,10,13035,"RANGEL, Charles B.",NY,13,16,100,-4.306530538,-0.514,0,0,0,1,11
102,10,13042,"SPENCE, Floyd Davidson",SC,48,2,200,1.814449104,0.32,1,0,0,1,59
102,10,13047,"YOUNG, Charles William (Bill)",FL,43,8,200,2.152645692,0.325,0,0,0,1,56
102,10,14015,"GILMAN, Benjamin Arthur",NY,13,22,200,0.35643666,0.043,0,1,0,1,57
102,10,14029,"LEHMAN, William",FL,43,17,100,-2.672100296,-0.483,0,0,0,0,59
102,10,14033,"MADIGAN, Edward Rell",IL,21,15,200,2.062060117,0.247,0,0,0,0,62
102,10,14033,"MADIGAN, Edward Rell",IL,21,15,200,2.062060117,0.247,0,0,0,0,62
102,10,14039,"MOAKLEY, John Joseph",MA,3,9,100,-2.686155579,-0.418,0,0,0,1,45
102,10,14040,"MOORHEAD, Carlos John",CA,71,22,200,3.102902196,0.465,0,0,0,1,64
102,10,14042,"OWENS, Douglas Wayne",UT,67,2,100,-1.860214705,-0.253,0,1,0,0,58
102,10,14045,"REGULA, Ralph Straus",OH,24,16,200,0.609182021,0.221,0,0,0,1,57
102,10,14046,"RINALDO, Matthew John",NJ,12,7,200,0.974234864,0.023,0,0,0,0,59
102,10,14048,"ROSE, Charles Grandison, III",NC,47,7,100,-2.048693665,-0.319,0,0,0,0,51
102,10,14051,"SCHROEDER, Patricia Scott",CO,62,1,100,-2.621890617,-0.225,1,0,1,0,36
102,10,14052,"SHUSTER, E. G. (Bud)",PA,14,9,200,2.192429044,0.416,0,0,0,1,63
102,10,14053,"STARK, Fortney Hillman (Pete), Jr.",CA,71,9,100,-2.277144391,-0.631,0,0,0,1,42
102,10,14055,"STUDDS, Gerry Eastman",MA,3,10,100,-3.892700874,-0.444,0,1,0,0,48
102,10,14058,"THORNTON, Raymond Hoyt (Ray), Jr.",AR,42,2,100,-1.043942465,-0.306,0,0,0,1,56
102,10,14062,"WILSON, Charles",TX,49,2,100,-0.212614405,-0.196,0,0,0,1,50
102,10,14066,"YOUNG, Donald Edwin",AK,81,1,200,1.181511021,0.278,0,0,0,1,59
102,10,14068,"COLLINS, Cardiss",IL,21,7,100,-3.99925963,-0.552,0,0,1,0,22
102,10,14071,"LAGOMARSINO, Robert John",CA,71,19,200,2.559048324,0.378,0,1,0,1,54
102,10,14072,"MURTHA, John Patrick, Jr.",PA,14,12,100,-0.742323469,-0.265,0,0,0,1,47
102,10,14075,"TRAXLER, Jerome Bob",MI,23,8,100,-2.03229668,-0.33,0,0,0,1,50
102,10,14201,"AuCOIN, Les",OR,72,1,100,-2.275253334,-0.231,0,0,0,1,47
102,10,14210,"CARR, Milton Robert (Bob)",MI,23,6,100,-0.882055527,-0.254,0,0,0,0,57
102,10,14212,"DERRICK, Butler Carson, Jr.",SC,48,3,100,-0.978344051,-0.215,0,0,0,0,66
102,10,14214,"DOWNEY, Thomas Joseph",NY,13,2,100,-2.7047358,-0.384,0,0,0,0,61
102,10,14216,"EARLY, Joseph Daniel",MA,3,3,100,-1.027556211,-0.254,0,0,0,1,50
102,10,14219,"ENGLISH, Glenn Lee, Jr.",OK,53,6,100,-0.32151384,-0.027,0,0,0,0,58
102,10,14224,"FORD, Harold Eugene",TN,54,9,100,-3.297208072,-0.438,0,0,0,0,34
102,10,14225,"GRADISON, Willis David, Jr.",OH,24,2,200,1.918445617,0.233,0,0,0,0,62
102,10,14233,"HEFNER, Willie Gathrel (Bill)",NC,47,8,100,-1.059024984,-0.264,0,0,0,0,62
102,10,14237,"HUBBARD, Carroll, Jr.",KY,51,1,100,-0.049634858,-0.038,0,0,0,0,51
102,10,14238,"HUGHES, William John",NJ,12,2,100,-1.177182584,-0.153,0,0,0,0,58
102,10,14239,"HYDE, Henry John",IL,21,6,200,2.017822909,0.312,0,1,0,1,68
102,10,14248,"LaFALCE, John Joseph",NY,13,32,100,-1.967042543,-0.357,0,0,0,1,48
102,10,14251,"LLOYD, Marilyn Laird",TN,54,3,100,-0.119150366,-0.058,1,0,1,0,62
102,10,14253,"McHUGH, Matthew Francis",NY,13,28,100,-2.137707433,-0.353,0,0,0,0,52
102,10,14256,"MILLER, George",CA,71,7,100,-3.193483723,-0.552,0,0,0,0,46
102,10,14257,"MINETA, Norman Y.",CA,71,13,100,-3.626198684,-0.479,0,0,0,1,49
102,10,14262,"NEAL, Stephen Lybrook",NC,47,5,100,-0.730914592,-0.145,0,0,0,0,60
102,10,14264,"NOWAK, Henry James",NY,13,33,100,-1.957391988,-0.332,0,0,0,1,33
102,10,14265,"OBERSTAR, James Louis",MN,33,8,100,-2.867749057,-0.553,0,0,0,0,39
102,10,14271,"RUSSO, Martin Anthony",IL,21,3,100,-1.965670753,-0.192,0,0,0,0,58
102,10,14273,"SCHULZE, Richard Taylor",PA,14,5,200,1.152366117,0.271,0,0,0,1,65
102,10,14274,"SHARP, Philip Riley",IN,22,2,100,-1.807170817,-0.166,0,0,0,0,65
102,10,14277,"SOLARZ, Stephen Joshua",NY,13,13,100,-1.865951198,-0.429,0,1,0,0,43
102,10,14280,"WAXMAN, Henry Arnold",CA,71,24,100,-2.602190806,-0.473,0,0,0,0,34
102,10,14288,"GOODLING, William Franklin",PA,14,19,200,1.165007735,0.336,0,1,0,1,65
102,10,14402,"APPLEGATE, Douglas Earl",OH,24,18,100,-0.370189848,-0.106,0,0,0,0,47
102,10,14404,"BARNARD, Druie Douglas, Jr.",GA,44,10,100,-0.209252292,-0.028,0,0,0,1,65
102,10,14405,"BEILENSON, Anthony Charles",CA,71,23,100,-1.830364172,-0.44,0,0,0,0,43
102,10,14407,"BONIOR, David Edward",MI,23,12,100,-3.029556982,-0.547,0,0,0,1,60
102,10,14410,"COLEMAN, Earl Thomas",MO,34,6,200,1.522829675,0.262,0,0,0,0,50
102,10,14413,"DICKS, Norman DeValois",WA,73,6,100,-1.051622803,-0.312,0,0,0,0,48
102,10,14414,"DORNAN, Robert Kenneth",CA,71,38,200,2.321085116,0.49,1,0,0,1,61
102,10,14415,"EDWARDS, Marvin Henry (Mickey)",OK,53,5,200,1.990559834,0.394,0,0,0,0,67
102,10,14421,"GEPHARDT, Richard Andrew",MO,34,3,100,-2.61096496,-0.416,0,0,0,1,53
102,10,14422,"GLICKMAN, Daniel Robert",KS,32,4,100,-1.025588153,-0.133,0,0,0,0,55
102,10,14427,"HUCKABY, Thomas Jerald",LA,45,5,100,-0.145334578,-0.009,0,0,0,0,62
102,10,14428,"IRELAND, Andrew Poysell (Andy)",FL,43,10,200,3.114137464,0.42,1,0,0,0,66
102,10,14429,"JENKINS, Edgar Lanier (Ed)",GA,44,9,100,-0.879776606,-0.116,0,0,0,1,71
102,10,14430,"KILDEE, Dale Edward",MI,23,7,100,-2.600866378,-0.385,0,0,0,0,44
102,10,14431,"KOSTMAYER, Peter Houston",PA,14,8,100,-3.038380061,-0.298,0,1,0,0,60
102,10,14432,"LEACH, James Albert Smith",IA,31,1,200,0.274909703,0.141,0,1,0,0,44
102,10,14435,"MARKEY, Edward John",MA,3,7,100,-3.965813065,-0.5,0,0,0,1,45
102,10,14437,"MARLENEE, Ronald Charles",MT,64,2,200,1.847061897,0.393,0,0,0,0,54
102,10,14441,"MURPHY, Austin John",PA,14,22,100,-1.125285946,-0.081,0,1,0,1,35
102,10,14443,"OAKAR, Mary Rose",OH,24,20,100,-2.90331175,-0.4,0,0,1,0,42
102,10,14444,"PANETTA, Leon Edward",CA,71,16,100,-2.298958098,-0.258,0,0,0,1,44
102,10,14445,"PEASE, Donald James",OH,24,13,100,-1.96071729,-0.308,0,0,0,1,53
102,10,14446,"PURSELL, Carl Duane",MI,23,2,200,1.182683001,0.12,0,0,0,1,58
102,10,14448,"RAHALL, Nick Joe, II",WV,56,4,100,-1.012170297,-0.306,0,0,0,0,42
102,10,14451,"SKELTON, Isaac Newton, IV (Ike)",MO,34,4,100,-0.342698314,-0.172,1,0,0,0,59
102,10,14454,"STUMP, Robert Lee",AZ,61,3,200,5.512210585,0.703,1,0,0,1,64
102,10,14458,"VENTO, Bruce Frank",MN,33,4,100,-3.56216115,-0.472,0,0,0,0,38
102,10,14459,"VOLKMER, Harold Lee",MO,34,9,100,-0.369825472,-0.196,0,0,0,1,54
102,10,14461,"WALKER, Robert Smith",PA,14,16,200,3.676413032,0.581,0,0,0,1,69
102,10,14463,"WEISS, Theodore S.",NY,13,17,100,-4.456148095,-0.564,0,1,0,1,21
102,10,14469,"LIVINGSTON, Robert Linlithgow, Jr.",LA,45,1,200,2.015253221,0.326,0,0,0,1,70
102,10,14471,"GREEN, Sedgwick William (Bill)",NY,13,15,200,0.169125501,-0.044,0,0,0,1,33
102,10,14601,"ANTHONY, Beryl Franklin, Jr.",AR,42,4,100,-1.057135112,-0.254,0,0,0,0,52
102,10,14605,"BEREUTER, Douglas Kent",NE,35,1,200,1.378455021,0.231,0,1,0,1,56
102,10,14608,"BYRON, Beverly Barton Butcher",MD,52,6,100,-0.259137975,-0.024,1,0,1,0,65
102,10,14612,"CLINGER, William Floyd, Jr.",PA,14,23,200,1.30572548,0.176,0,0,0,1,56
102,10,14616,"DANNEMEYER, William Edwin",CA,71,39,200,3.477671472,0.691,0,0,0,1,71
102,10,14618,"DAVIS, Robert William",MI,23,11,200,1.18788297,0.098,1,0,0,0,52
102,10,14620,"DIXON, Julian Carey",CA,71,28,100,-2.173911208,-0.458,0,0,0,1,26
102,10,14621,"DONNELLY, Brian Joseph",MA,3,11,100,-1.489809425,-0.291,0,0,0,0,47
102,10,14624,"FAZIO, Victor Herbert, Jr.",CA,71,4,100,-1.694123916,-0.455,0,0,0,0,51
102,10,14626,"FROST, Jonas Martin",TX,49,24,100,-1.185406177,-0.316,0,0,0,1,47
102,10,14627,"GINGRICH, Newton Leroy",GA,44,6,200,2.3018423,0.377,0,0,0,0,67
102,10,14629,"GRAY, William Herbert, III",PA,14,2,100,-3.001263586,-0.511,0,0,0,0,8
102,10,14629,"GRAY, William Herbert, III",PA,14,2,100,-3.001263586,-0.511,0,0,0,0,8
102,10,14631,"GUARINI, Frank Joseph, Jr.",NJ,12,14,100,-0.841054038,-0.295,0,0,0,1,44
102,10,14632,"HALL, Tony Patrick",OH,24,3,100,-1.658102371,-0.28,0,0,0,0,54
102,10,14635,"HOPKINS, Larry Jones",KY,51,6,200,2.731671111,0.347,1,0,0,1,57
102,10,14636,"HUTTO, Earl Dewitt",FL,43,1,100,0.28155758,-0.007,1,0,0,1,73
102,10,14644,"LEWIS, Charles Jeremy (Jerry)",CA,71,35,200,2.221555274,0.348,0,0,0,0,65
102,10,14649,"MATSUI, Robert T.",CA,71,3,100,-2.115295523,-0.404,0,0,0,0,50
102,10,14650,"MAVROULES, Nicholas James",MA,3,6,100,-2.010981809,-0.342,1,0,0,0,48
102,10,14654,"RITTER, Donald Lawrence",PA,14,15,200,1.194783313,0.268,0,0,0,0,55
102,10,14655,"ROTH, Toby A.",WI,25,8,200,1.608138455,0.351,0,1,0,1,53
102,10,14656,"SABO, Martin Olav",MN,33,5,100,-3.587483621,-0.516,0,0,0,0,33
102,10,14657,"SENSENBRENNER, Frank James, Jr.",WI,25,9,200,1.202977373,0.646,0,0,0,0,60
102,10,14661,"SNOWE, Olympia Jean",ME,2,2,200,0.327313073,0.091,0,1,1,0,55
102,10,14662,"SOLOMON, Gerald Brooks Hunt",NY,13,24,200,2.463708191,0.492,0,0,0,1,58
102,10,14664,"STENHOLM, Charles Walter",TX,49,17,100,-0.025567399,0.019,0,0,0,0,58
102,10,14666,"SWIFT, Allan Byron",WA,73,2,100,-2.222920035,-0.43,0,0,0,0,49
102,10,14667,"SYNAR, Michael Lynn",OK,53,2,100,-2.927350858,-0.321,0,0,0,0,53
102,10,14669,"THOMAS, William Marshall",CA,71,20,200,1.8729066,0.371,0,0,0,0,65
102,10,14672,"WILLIAMS, John Patrick",MT,64,1,100,-1.187152502,-0.315,0,0,0,1,50
102,10,14673,"WOLPE, Howard Eliot, III",MI,23,3,100,-3.840156755,-0.374,0,1,0,0,54
102,10,14675,"PETRI, Thomas Evert",WI,25,6,200,0.65513999,0.379,0,0,0,0,54
102,10,14677,"PORTER, John Edward",IL,21,10,200,0.743486996,0.217,0,0,0,1,62
102,10,14679,"TAUZIN, Wilbert Joseph (Billy)",LA,45,3,100,0.001410971,0.03,0,0,0,0,54
102,10,14802,"BLILEY, Thomas Jerome, Jr.",VA,40,3,200,2.205568314,0.382,0,0,0,1,63
102,10,14808,"COYNE, William Joseph",PA,14,14,100,-2.905880879,-0.494,0,0,0,1,26
102,10,14812,"DORGAN, Byron Leslie",ND,36,1,100,-1.590407061,-0.267,0,0,0,0,56
102,10,14813,"DREIER, David Timothy",CA,71,33,200,3.494916599,0.478,0,0,0,0,62
102,10,14815,"DWYER, Bernard James",NJ,12,6,100,-1.90123335,-0.373,0,0,0,1,53
102,10,14816,"DYMALLY, Mervyn Malcolm",CA,71,31,100,-4.805723283,-0.685,0,1,0,0,34
102,10,14818,"ECKART, Dennis Edward",OH,24,11,100,-1.899001345,-0.242,0,0,0,0,55
102,10,14819,"EMERSON, Norvell William (Bill)",MO,34,8,200,1.449505909,0.332,0,0,0,1,55
102,10,14822,"FIELDS, Jack Milton, Jr.",TX,49,8,200,3.792961433,0.541,0,0,0,0,54
102,10,14823,"FOGLIETTA, Thomas Michael",PA,14,1,100,-3.022368354,-0.506,1,1,0,0,33
102,10,14824,"FRANK, Barney",MA,3,4,100,-3.878382525,-0.499,0,0,0,0,42
102,10,14825,"GEJDENSON, Samuel",CT,1,2,100,-3.243035153,-0.416,0,1,0,0,50
102,10,14827,"GUNDERSON, Steven Craig",WI,25,3,200,0.994579466,0.203,0,0,0,0,47
102,10,14828,"HALL, Ralph Moody",TX,49,4,100,0.010316996,0.096,0,0,0,1,61
102,10,14829,"HANSEN, James Vear",UT,67,1,200,3.352550677,0.496,1,0,0,1,72
102,10,14831,"HATCHER, Charles Floyd",GA,44,2,100,-0.800181926,-0.202,0,0,0,1,58
102,10,14833,"HERTEL, Dennis Mark",MI,23,14,100,-2.257637038,-0.345,1,0,0,0,55
102,10,14835,"HUNTER, Duncan Lee",CA,71,45,200,1.67097165,0.47,1,0,0,1,66
102,10,14837,"LANTOS, Thomas Peter",CA,71,11,100,-1.726321094,-0.376,0,1,0,0,41
102,10,14839,"LOWERY, William David",CA,71,41,200,2.139892712,0.33,0,0,0,0,58
102,10,14840,"MARTIN, David O'Brien",NY,13,26,200,2.057420999,0.232,1,0,0,1,55
102,10,14842,"McCOLLUM, Ira William, Jr. (Bill)",FL,43,5,200,2.369149496,0.377,0,0,0,1,68
102,10,14843,"McCURDY, David Keith",OK,53,4,100,-0.934580277,-0.112,1,0,0,0,58
102,10,14844,"McEWEN, Bob",OH,24,6,200,2.325345186,0.359,0,0,0,0,64
102,10,14845,"McGRATH, Raymond Joseph",NY,13,5,200,0.436222938,0.185,0,0,0,0,56
102,10,14847,"MORRISON, Sidney Wallace",WA,73,4,200,0.449032602,0.153,0,0,0,1,57
102,10,14852,"ROBERTS, Charles Patrick (Pat)",KS,32,1,200,1.96242864,0.415,0,0,0,1,60
102,10,14854,"ROGERS, Harold Dallas (Hal)",KY,51,5,200,1.457089081,0.331,0,0,0,1,66
102,10,14855,"ROUKEMA, Margaret Scafati",NJ,12,5,200,0.282639216,0.162,0,0,1,0,66
102,10,14856,"SAVAGE, Gus",IL,21,2,100,-2.242941253,-0.671,0,0,0,1,15
102,10,14858,"SCHUMER, Charles Ellis (Chuck)",NY,13,10,100,-2.231816737,-0.35,0,0,0,0,43
102,10,14860,"SHAW, Eugene Clay, Jr.",FL,43,15,200,2.524278035,0.3,0,0,0,0,53
102,10,14861,"SKEEN, Joseph Richard",NM,66,2,200,1.636259502,0.301,0,0,0,1,58
102,10,14863,"SMITH, Christopher Henry",NJ,12,4,200,0.865321274,0.158,0,1,0,0,55
102,10,14868,"WEBER, John Vincent (Vin)",MN,33,2,200,1.59697535,0.381,0,0,0,0,51
102,10,14869,"WOLF, Frank Rudolph",VA,40,10,200,1.283009624,0.284,0,0,0,1,57
102,10,14871,"WYDEN, Ronald Lee",OR,72,3,100,-2.174100415,-0.314,0,0,0,0,38
102,10,14873,"HOYER, Steny Hamilton",MD,52,5,100,-1.53101674,-0.379,0,0,0,0,40
102,10,14875,"OXLEY, Michael Garver",OH,24,4,200,2.220008146,0.382,0,0,0,0,67
102,10,14877,"KENNELLY, Barbara Bailey",CT,1,1,100,-2.054368941,-0.346,0,0,1,0,44
102,10,14879,"MART̍NEZ, Matthew G.",CA,71,30,100,-2.030185479,-0.341,0,0,0,1,46
102,10,15000,"ACKERMAN, Gary Leonard",NY,13,7,100,-2.5916554,-0.429,0,0,0,0,39
102,10,15001,"ANDREWS, Michael Allen",TX,49,25,100,-0.658577245,-0.135,0,0,0,0,48
102,10,15002,"BARTLETT, Harry Stephen (Steve)",TX,49,3,200,2.274665257,0.46,1,0,0,0,74
102,10,15002,"BARTLETT, Harry Stephen (Steve)",TX,49,3,200,2.274665257,0.46,1,0,0,0,74
102,10,15003,"BATEMAN, Herbert Harvell",VA,40,1,200,1.670327382,0.242,0,0,0,1,60
102,10,15005,"BERMAN, Howard Lawrence",CA,71,26,100,-2.033621553,-0.404,0,0,0,0,44
102,10,15006,"BILIRAKIS, Michael",FL,43,9,200,1.674157216,0.382,0,0,0,1,60
102,10,15007,"BOEHLERT, Sherwood Louis",NY,13,25,200,0.250290391,0.103,0,0,0,1,54
102,10,15008,"BORSKI, Robert Anthony, Jr.",PA,14,3,100,-1.455852524,-0.416,0,0,0,0,51
102,10,15010,"BOUCHER, Frederick C.",VA,40,9,100,-1.843897889,-0.265,1,0,0,0,54
102,10,15011,"BOXER, Barbara",CA,71,6,100,-3.50626681,-0.45,0,0,1,0,35
102,10,15013,"BRYANT, John Wiley",TX,49,5,100,-1.591695316,-0.358,0,1,0,0,49
102,10,15014,"BURTON, Danny Lee",IN,22,6,200,2.902819119,0.585,0,0,0,1,69
102,10,15015,"CARPER, Thomas Richard",DE,11,1,100,-0.896646907,-0.174,0,0,0,1,56
102,10,15016,"CHANDLER, Rodney Dennis",WA,73,8,200,1.557644553,0.254,0,0,0,0,56
102,10,15018,"COLEMAN, Ronald D'Emory",TX,49,16,100,-1.210936879,-0.402,0,0,0,1,47
102,10,15019,"COOPER, James Hayes Shofner",TN,54,4,100,-0.576353794,-0.162,0,0,0,0,57
102,10,15021,"DURBIN, Richard Joseph",IL,21,20,100,-2.495134703,-0.365,0,0,0,0,51
102,10,15022,"ERDREICH, Ben",AL,41,6,100,-0.249942754,-0.06,1,0,0,1,59
102,10,15023,"EVANS, Lane Allen",IL,21,17,100,-2.195090111,-0.454,0,1,0,1,47
102,10,15024,"FEIGHAN, Edward Farrell",OH,24,19,100,-2.65081402,-0.304,0,0,0,0,55
102,10,15026,"GEKAS, George William",PA,14,17,200,2.998483297,0.426,0,0,0,1,63
102,10,15028,"JOHNSON, Nancy Lee",CT,1,6,200,0.519066339,0.122,0,0,1,0,53
102,10,15029,"KAPTUR, Marcia Carolyn (Marcy)",OH,24,9,100,-1.36438737,-0.349,1,0,1,0,46
102,10,15030,"KASICH, John Richard",OH,24,12,200,1.269698002,0.314,0,0,0,0,61
102,10,15031,"KOLTER, Joseph Paul",PA,14,4,100,-0.905928553,-0.28,0,0,0,1,45
102,10,15032,"LEHMAN, Richard Henry",CA,71,18,100,-0.964123811,-0.27,0,0,0,0,46
102,10,15033,"LEVIN, Sander Martin",MI,23,17,100,-3.094937403,-0.377,0,1,0,0,46
102,10,15034,"LEVINE, Meldon Edises",CA,71,27,100,-2.001368094,-0.436,0,0,0,0,44
102,10,15035,"LEWIS, Thomas F.",FL,43,12,200,3.511915353,0.387,0,0,0,1,64
102,10,15036,"LIPINSKI, William Oliver",IL,21,5,100,-0.424332513,-0.176,0,0,0,1,51
102,10,15040,"McCANDLESS, Alfred A.",CA,71,37,200,2.281094547,0.474,1,1,0,1,61
102,10,15041,"McCLOSKEY, Francis Xavier",IN,22,8,100,-2.068675178,-0.336,0,0,0,1,57
102,10,15044,"MOODY, Jim",WI,25,5,100,-2.578474715,-0.347,0,0,0,0,35
102,10,15046,"MRAZEK, Robert Jan",NY,13,3,100,-2.686633459,-0.349,0,0,0,1,59
102,10,15048,"OLIN, James R.",VA,40,6,100,-0.775919131,-0.119,0,0,0,1,61
102,10,15049,"ORTIZ, Solomon P.",TX,49,27,100,-0.743940146,-0.272,1,0,0,1,46
102,10,15050,"OWENS, Major Robert Odell",NY,13,12,100,-4.140841042,-0.569,0,0,0,0,9
102,10,15051,"PACKARD, Ronald C.",CA,71,43,200,3.010528318,0.419,0,0,0,1,68
102,10,15052,"PENNY, Timothy Joseph",MN,33,1,100,-0.688907043,-0.051,0,0,0,0,51
102,10,15053,"RAY, Richard Belmont",GA,44,3,100,-0.216138942,0.035,1,0,0,1,57
102,10,15055,"RICHARDSON, Bill",NM,66,3,100,-1.376657526,-0.321,0,0,0,0,44
102,10,15056,"RIDGE, Thomas Joseph",PA,14,21,200,0.486717076,0.186,0,0,0,1,49
102,10,15057,"ROWLAND, James Roy, Jr.",GA,44,8,100,-0.677648783,-0.127,0,0,0,1,54
102,10,15058,"SCHAEFER, Daniel",CO,62,6,200,3.190466545,0.479,0,0,0,1,57
102,10,15059,"SIKORSKI, Gerald Edward",MN,33,6,100,-3.341425193,-0.217,1,0,0,0,48
102,10,15060,"SISISKY, Norman",VA,40,4,100,-0.809955952,-0.122,0,0,0,1,55
102,10,15061,"SLATTERY, James Charles",KS,32,2,100,-0.765890172,-0.099,0,0,0,0,53
102,10,15062,"SMITH, Lawrence Jack",FL,43,16,100,-2.6602066,-0.355,0,0,0,0,55
102,10,15063,"SMITH, Robert Freeman",OR,72,2,200,2.962079165,0.396,1,0,0,0,54
102,10,15064,"SPRATT, John McKee, Jr.",SC,48,5,100,-0.925722108,-0.256,0,0,0,1,60
102,10,15065,"STAGGERS, Harley Orrin, Jr.",WV,56,2,100,-1.986839653,-0.315,0,0,0,0,51
102,10,15066,"SUNDQUIST, Donald Kenneth",TN,54,7,200,2.114150421,0.371,0,0,0,1,67
102,10,15068,"TALLON, Robert Mooneyhan, Jr. (Robin)",SC,48,6,100,-0.551094975,-0.1,0,0,0,0,56
102,10,15069,"THOMAS, Robert Lindsay",GA,44,1,100,-0.595388376,-0.14,0,0,0,0,60
102,10,15070,"TORRES, Esteban Edward",CA,71,34,100,-2.313137916,-0.487,0,1,0,1,49
102,10,15071,"TORRICELLI, Robert Guy",NJ,12,9,100,-0.897977501,-0.262,0,0,0,0,53
102,10,15072,"TOWNS, Edolphus",NY,13,11,100,-4.395226882,-0.519,0,0,0,1,16
102,10,15073,"VALENTINE, Itimous Thaddeus, Jr., (Tim)",NC,47,2,100,-0.203552434,-0.084,0,0,0,1,49
102,10,15075,"VUCANOVICH, Barbara Farrell",NV,65,2,200,3.355777283,0.441,0,0,1,0,62
102,10,15076,"WHEAT, Alan Dupree",MO,34,5,100,-3.761730648,-0.465,0,0,0,0,39
102,10,15077,"WISE, Robert Ellsworth, Jr.",WV,56,3,100,-2.023236297,-0.32,0,0,0,0,47
102,10,15079,"HAYES, Charles Arthur",IL,21,1,100,-4.973920084,-0.656,0,0,0,0,4
102,10,15081,"DARDEN, George (Buddy)",GA,44,7,100,-0.785256571,-0.161,0,0,0,0,70
102,10,15082,"KLECZKA, Gerald Daniel",WI,25,4,100,-2.062422016,-0.322,0,0,0,1,43
102,10,15083,"MOLLOHAN, Alan Bowlby",WV,56,1,100,-0.724022677,-0.292,0,0,0,1,48
102,10,15084,"ATKINS, Chester Greenough",MA,3,5,100,-2.837510345,-0.407,1,0,0,0,47
102,10,15085,"BARTON, Joe Linus",TX,49,6,200,2.527836891,0.528,0,0,0,0,62
102,10,15086,"BENTLEY, Helen Delich",MD,52,2,200,0.873251805,0.276,0,0,1,0,62
102,10,15088,"BRUCE, Terry Lee",IL,21,19,100,-1.967718212,-0.268,0,0,0,0,54
102,10,15089,"BUSTAMANTE, Albert G.",TX,49,23,100,-2.343851193,-0.392,1,0,0,1,50
102,10,15090,"CALLAHAN, Herbert Leon (Sonny)",AL,41,1,200,2.597656485,0.373,0,0,0,1,62
102,10,15092,"COBLE, Howard",NC,47,6,200,1.695564796,0.52,0,0,0,1,61
102,10,15093,"COMBEST, Larry Ed",TX,49,19,200,2.82240743,0.458,0,0,0,0,67
102,10,15094,"DeLAY, Thomas Dale",TX,49,22,200,3.919771,0.593,0,0,0,0,62
102,10,15098,"FAWELL, Harris W.",IL,21,13,200,1.23717559,0.332,0,0,0,0,68
102,10,15099,"GALLO, Dean Anderson",NJ,12,11,200,0.976240939,0.203,0,0,0,0,64
102,10,15100,"GORDON, Barton Jennings",TN,54,6,100,-1.487968257,-0.204,0,0,0,1,60
102,10,15103,"HENRY, Paul B.",MI,23,5,200,0.748030374,0.264,0,0,0,0,64
102,10,15104,"KANJORSKI, Paul E.",PA,14,11,100,-1.178795008,-0.303,0,0,0,1,52
102,10,15105,"KOLBE, James Thomas",AZ,61,5,200,1.346248385,0.351,0,0,0,1,55
102,10,15106,"LIGHTFOOT, James Ross",IA,31,5,200,2.527746869,0.391,0,0,0,1,47
102,10,15107,"MANTON, Thomas J.",NY,13,9,100,-1.971751788,-0.361,0,0,0,1,48
102,10,15108,"McMILLAN, John Alexander, III (Alex)",NC,47,9,200,1.99724064,0.294,0,0,0,1,61
102,10,15109,"MEYERS, Jan",KS,32,3,200,0.721621537,0.208,0,0,1,0,54
102,10,15110,"MILLER, John Ripin",WA,73,1,200,0.907649963,0.168,0,0,0,0,49
102,10,15112,"SAXTON, Hugh James",NJ,12,13,200,1.230293841,0.238,1,0,0,0,61
102,10,15115,"SLAUGHTER, Daniel French, Jr.",VA,40,7,200,2.609868208,0.38,0,0,0,1,66
102,10,15115,"SLAUGHTER, Daniel French, Jr.",VA,40,7,200,2.609868208,0.38,0,0,0,1,66
102,10,15117,"STALLINGS, Richard Howard",ID,63,2,100,-0.87446106,-0.084,0,0,0,0,65
102,10,15121,"TRAFICANT, James A., Jr.",OH,24,17,100,-0.911173713,-0.082,0,0,0,0,38
102,10,15124,"VISCLOSKY, Peter",IN,22,1,100,-1.418976917,-0.402,0,0,0,0,41
102,10,15125,"ARMEY, Richard Keith",TX,49,26,200,4.502975477,0.635,0,0,0,0,68
102,10,15129,"CHAPMAN, Jim",TX,49,1,100,-0.510485632,-0.198,0,0,0,0,52
102,10,15171,"PATTERSON, Elizabeth J.",SC,48,4,100,-0.250989977,-0.055,0,0,1,0,67
102,10,15228,"PERKINS, Carl Christopher",KY,51,7,100,-1.486595293,-0.56,0,0,0,0,44
102,10,15245,"ABERCROMBIE, Neil",HI,82,1,100,-3.483556253,-0.432,1,0,0,0,45
102,10,15401,"BAKER, Richard Hugh",LA,45,6,200,2.660978954,0.423,0,0,0,0,60
102,10,15402,"BALLENGER, Cass",NC,47,10,200,2.442557141,0.464,1,0,0,1,65
102,10,15403,"BILBRAY, James Hubert",NV,65,1,100,-0.75963546,-0.184,0,0,0,0,56
102,10,15406,"BUNNING, James Paul David",KY,51,4,200,3.323147295,0.521,0,0,0,0,65
102,10,15407,"CAMPBELL, Ben Nighthorse",CO,62,3,100,-0.454746957,-0.141,0,0,0,1,52
102,10,15408,"CARDIN, Benjamin Louis",MD,52,3,100,-2.110613329,-0.329,0,0,0,0,45
102,10,15410,"DeFAZIO, Peter Anthony",OR,72,4,100,-2.250330621,-0.428,0,0,0,1,44
102,10,15411,"ESPY, Alphonso Michael (Mike)",MS,46,2,100,-2.189928885,-0.386,0,0,0,0,48
102,10,15412,"FLAKE, Floyd Harold",NY,13,6,100,-4.097752588,-0.455,0,1,0,0,27
102,10,15413,"GALLEGLY, Elton W.",CA,71,21,200,2.908110515,0.402,0,0,0,0,64
102,10,15414,"GRANDY, Frederick Lawrence",IA,31,6,200,1.291891706,0.283,0,0,0,0,50
102,10,15416,"HARRIS, Claude, Jr.",AL,41,7,100,-0.233577934,-0.085,0,0,0,0,57
102,10,15416,"HARRIS, Claude, Jr.",AL,41,7,100,-0.233577934,-0.085,0,0,0,0,57
102,10,15416,"HARRIS, Claude, Jr.",AL,41,7,100,-0.233577934,-0.085,0,0,0,0,57
102,10,15416,"HARRIS, Claude, Jr.",AL,41,7,100,-0.233577934,-0.085,0,0,0,0,57
102,10,15417,"HASTERT, John Dennis",IL,21,14,200,2.847466989,0.443,0,0,0,0,64
102,10,15418,"HAYES, James Allison",LA,45,7,100,-0.137694985,-0.057,1,0,0,0,49
102,10,15419,"HEFLEY, Joel M.",CO,62,5,200,2.065949039,0.591,0,0,0,0,67
102,10,15420,"HERGER, Walter William (Wally)",CA,71,2,200,2.995975844,0.551,1,0,0,0,58
102,10,15421,"HOCHBRUECKNER, George Joseph",NY,13,1,100,-1.765081338,-0.348,0,0,0,1,60
102,10,15422,"HOLLOWAY, Clyde Cecil",LA,45,8,200,1.772223212,0.475,0,1,0,0,45
102,10,15423,"HOUGHTON, Amory, Jr.",NY,13,34,200,0.67485542,0.154,0,0,0,1,59
102,10,15424,"INHOFE, James Mountain",OK,53,1,200,2.727176906,0.551,0,0,0,0,61
102,10,15425,"JOHNSON, Timothy Peter (Tim)",SD,37,1,100,-1.249906836,-0.25,0,0,0,0,53
102,10,15426,"JONTZ, James Prather",IN,22,5,100,-2.525603729,-0.357,0,0,0,0,65
102,10,15427,"KENNEDY, Joseph Patrick, II",MA,3,8,100,-3.641478411,-0.413,0,0,0,0,33
102,10,15429,"KYL, Jon Llewellyn",AZ,61,4,200,3.242897288,0.548,1,0,0,0,65
102,10,15429,"KYL, Jon Llewellyn",AZ,61,4,200,3.242897288,0.548,1,0,0,0,65
102,10,15429,"KYL, Jon Llewellyn",AZ,61,4,200,3.242897288,0.548,1,0,0,0,65
102,10,15429,"KYL, Jon Llewellyn",AZ,61,4,200,3.242897288,0.548,1,0,0,0,65
102,10,15430,"LANCASTER, H. Martin",NC,47,3,100,-0.566110372,-0.134,0,0,0,1,58
102,10,15431,"LEWIS, John R.",GA,44,5,100,-4.913723075,-0.588,0,0,0,0,31
102,10,15432,"McMILLEN, Charles Thomas",MD,52,4,100,-1.234157199,-0.214,0,0,0,0,57
102,10,15433,"MFUME, Kweisi",MD,52,7,100,-3.226716437,-0.446,0,0,0,0,17
102,10,15434,"MORELLA, Constance A.",MD,52,8,200,0.111966793,-0.018,0,0,1,0,46
102,10,15435,"NAGLE, David Ray",IA,31,3,100,-2.849181568,-0.349,0,0,0,0,43
102,10,15437,"PICKETT, Owen Bradford",VA,40,2,100,-0.484281897,-0.149,1,0,0,0,59
102,10,15438,"PRICE, David Eugene",NC,47,4,100,-1.889693012,-0.339,1,0,0,0,55
102,10,15439,"RAVENEL, Arthur, Jr.",SC,48,1,200,0.809388475,0.162,0,0,0,1,61
102,10,15440,"RHODES, John Jacob, III",AZ,61,1,200,3.193173453,0.407,0,0,0,1,60
102,10,15442,"SAWYER, Thomas Charles",OH,24,14,100,-2.88431984,-0.377,0,0,0,0,47
102,10,15443,"SKAGGS, David Evans",CO,62,2,100,-2.320661001,-0.355,0,0,0,1,48
102,10,15444,"SLAUGHTER, Louise McIntosh",NY,13,30,100,-2.458756054,-0.464,0,0,1,0,54
102,10,15445,"SMITH, Lamar Seeligson",TX,49,21,200,2.250535377,0.423,0,0,0,0,70
102,10,15446,"UPTON, Frederick Stephen",MI,23,4,200,1.18270813,0.339,1,0,0,0,63
102,10,15447,"WELDON, Wayne Curtis (Curt)",PA,14,7,200,1.224722076,0.232,0,0,0,0,60
102,10,15448,"PELOSI, Nancy",CA,71,5,100,-3.963482963,-0.493,0,0,1,0,28
102,10,15449,"SHAYS, Christopher H.",CT,1,4,200,0.299093131,0.129,0,0,0,0,57
102,10,15450,"CLEMENT, Robert Nelson",TN,54,5,100,-0.853029422,-0.216,1,0,0,1,52
102,10,15451,"McCRERY, James O., III",LA,45,4,200,2.036868722,0.362,0,0,0,0,59
102,10,15452,"PAYNE, Lewis Franklin, Jr.",VA,40,5,100,-0.665628185,-0.148,0,0,0,1,62
102,10,15453,"COSTELLO, Jerry Francis",IL,21,21,100,-0.70202503,-0.317,0,0,0,0,45
102,10,15454,"PALLONE, Frank, Jr.",NJ,12,3,100,-1.023982694,-0.398,0,0,0,0,62
102,10,15455,"DUNCAN, John J., Jr.",TN,54,2,200,1.259930316,0.598,0,0,0,1,64
102,10,15600,"CAMPBELL, Thomas J.",CA,71,12,200,1.171091077,0.256,0,0,0,0,49
102,10,15601,"COX, Charles Christopher",CA,71,40,200,2.546072603,0.54,0,0,0,0,68
102,10,15603,"ENGEL, Eliot Lance",NY,13,19,100,-2.244769886,-0.407,0,0,0,0,45
102,10,15604,"GILLMOR, Paul Eugene",OH,24,5,200,1.332062791,0.254,0,0,0,1,61
102,10,15605,"GOSS, Porter J.",FL,43,13,200,3.008394711,0.421,0,1,0,1,68
102,10,15605,"GOSS, Porter J.",FL,43,13,200,3.008394711,0.421,0,1,0,1,68
102,10,15606,"HANCOCK, Melton D. (Mel)",MO,34,7,200,4.705744031,0.79,0,0,0,1,61
102,10,15607,"HOAGLAND, Peter J.",NE,35,2,100,-1.113489494,-0.209,0,1,0,1,58
102,10,15608,"JAMES, Craig T.",FL,43,4,200,2.116807597,0.343,0,0,0,1,64
102,10,15609,"JOHNSTON, Harry A., II",FL,43,14,100,-2.297560821,-0.372,0,0,0,1,53
102,10,15611,"LAUGHLIN, Gregory H.",TX,49,14,100,-0.378469278,-0.097,0,1,0,1,57
102,10,15612,"LOWEY, Nita M.",NY,13,20,100,-3.294900569,-0.389,0,0,1,0,51
102,10,15613,"McDERMOTT, James A.",WA,73,7,100,-2.89890118,-0.666,0,0,0,1,32
102,10,15614,"McNULTY, Michael Robert",NY,13,23,100,-1.09737122,-0.369,0,0,0,0,43
102,10,15615,"MACHTLEY, Ronald K.",RI,5,1,200,0.591236662,0.113,1,0,0,1,42
102,10,15616,"NEAL, Richard Edmund",MA,3,2,100,-2.49891571,-0.416,0,0,0,0,47
102,10,15617,"PARKER, Michael (Mike)",MS,46,4,100,-0.154587075,0.034,1,0,0,0,57
102,10,15618,"PAXON, L. William",NY,13,31,200,2.274690655,0.472,0,0,0,0,56
102,10,15619,"PAYNE, Donald Milford",NJ,12,10,100,-5.14603196,-0.592,0,0,0,0,20
102,10,15620,"POSHARD, Glenn",IL,21,22,100,-1.406348611,-0.211,0,0,0,1,48
102,10,15621,"ROHRABACHER, Dana",CA,71,42,200,1.874624248,0.628,0,0,0,0,65
102,10,15622,"SANGMEISTER, George Edward",IL,21,4,100,-0.768837085,-0.226,0,1,0,1,55
102,10,15623,"SARPALIUS, William",TX,49,13,100,-0.388290789,-0.078,0,0,0,0,63
102,10,15624,"SCHIFF, Steven Harvey",NM,66,1,200,0.925600737,0.196,0,0,0,1,54
102,10,15627,"STEARNS, Clifford Bundy",FL,43,6,200,3.06387256,0.554,0,0,0,1,61
102,10,15628,"TANNER, John S.",TN,54,8,100,-0.463060656,-0.182,0,0,0,1,56
102,10,15629,"UNSOELD, Jolene",WA,73,3,100,-3.708317972,-0.52,0,0,1,0,47
102,10,15630,"WALSH, James T.",NY,13,27,200,0.928512255,0.208,0,0,0,0,52
102,10,15631,"LONG, Jill Lynette",IN,22,4,100,-2.124555302,-0.224,1,0,1,0,66
102,10,15632,"BROWDER, John Glen",AL,41,3,100,-0.387631723,-0.165,0,0,0,0,60
102,10,15633,"THOMAS, Craig Lyle",WY,68,1,200,2.083552619,0.446,0,0,0,0,61
102,10,15634,"ROS-LEHTINEN, Ileana",FL,43,18,200,1.853554868,0.245,0,0,1,0,58
102,10,15635,"CONDIT, Gary Adrian",CA,71,15,100,-0.590881044,-0.103,1,0,0,0,52
102,10,15636,"GEREN, Preston M. (Pete)",TX,49,12,100,-0.16293163,-0.032,0,0,0,0,53
102,10,15637,"TAYLOR, Gary Eugene (Gene)",MS,46,5,100,-0.042632141,-0.045,1,1,0,1,69
102,10,15639,"MOLINARI, Susan",NY,13,14,200,1.487655786,0.256,0,0,1,0,61
102,10,15823,"LUKEN, Charles J.",OH,24,1,100,-0.714772841,-0.099,0,0,0,0,63
102,10,29100,"CRAMER, Robert E. (Bud), Jr.",AL,41,5,100,-0.414508642,-0.132,0,0,0,1,57
102,10,29101,"PASTOR, Ed",AZ,61,2,100,-2.492824487,-0.421,0,0,0,0,43
102,10,29101,"PASTOR, Ed",AZ,61,2,100,-2.492824487,-0.421,0,0,0,0,65
102,10,29103,"RIGGS, Frank D.",CA,71,1,200,0.807634667,0.333,0,0,0,1,43
102,10,29104,"DOOLITTLE, John Taylor",CA,71,14,200,3.634231817,0.519,0,0,0,0,59
102,10,29105,"DOOLEY, Calvin M.",CA,71,17,100,-1.396535911,-0.19,0,0,0,0,59
102,10,29106,"WATERS, Maxine",CA,71,29,100,-3.336987514,-0.66,0,0,1,0,19
102,10,29107,"CUNNINGHAM, Randall (Duke)",CA,71,44,200,1.879934674,0.411,1,0,0,1,47
102,10,29108,"ALLARD, A. Wayne",CO,62,4,200,2.252972541,0.572,0,0,0,0,55
102,10,29109,"DeLAURO, Rosa L.",CT,1,3,100,-2.176718158,-0.418,0,0,1,0,50
102,10,29110,"FRANKS, Gary A.",CT,1,5,200,1.458839951,0.273,1,0,0,0,58
102,10,29111,"PETERSON, Douglas Brian (Pete)",FL,43,2,100,-1.231809141,-0.261,0,0,0,1,59
102,10,29112,"BACCHUS, James",FL,43,11,100,-0.881160225,-0.236,0,0,0,0,70
102,10,29114,"LaROCCO, Larry",ID,63,1,100,-1.782888096,-0.243,0,0,0,1,59
102,10,29115,"EWING, Thomas W.",IL,21,15,200,1.143567643,0.361,0,0,0,1,62
102,10,29115,"EWING, Thomas W.",IL,21,15,200,1.143567643,0.361,0,0,0,1,62
102,10,29116,"COX, John W., Jr.",IL,21,16,100,-1.917257171,-0.313,0,0,0,0,57
102,10,29117,"ROEMER, Timothy John",IN,22,3,100,-0.750555887,-0.165,0,0,0,0,59
102,10,29118,"NUSSLE, James Allen",IA,31,2,200,1.113460849,0.417,0,0,0,0,43
102,10,29119,"NICHOLS, Richard",KS,32,5,200,2.093114916,0.398,0,0,0,1,56
102,10,29120,"JEFFERSON, William Jennings",LA,45,2,100,-2.054720112,-0.424,0,0,0,1,31
102,10,29121,"ANDREWS, Thomas Hiram",ME,2,1,100,-2.775593598,-0.398,1,0,0,0,56
102,10,29122,"GILCHREST, Wayne Thomas",MD,52,1,200,0.936284114,0.204,0,0,0,1,63
102,10,29123,"OLVER, John Walter",MA,3,1,100,-3.010254576,-0.577,0,0,0,0,41
102,10,29123,"OLVER, John Walter",MA,3,1,100,-3.010254576,-0.577,0,0,0,0,41
102,10,29124,"CAMP, David Lee",MI,23,10,200,1.32582502,0.385,0,0,0,0,58
102,10,29125,"COLLINS, Barbara-Rose",MI,23,13,100,-2.824194962,-0.648,0,0,1,0,14
102,10,29126,"RAMSTAD, James (Jim)",MN,33,3,200,1.276654638,0.316,0,0,0,1,54
102,10,29127,"PETERSON, Collin Clark",MN,33,7,100,-1.568255746,-0.145,0,0,0,1,51
102,10,29128,"HORN, Joan Kelly",MO,34,2,100,-2.1154029,-0.288,0,0,1,0,61
102,10,29129,"BARRETT, William E.",NE,35,3,200,2.749700058,0.379,0,0,0,1,67
102,10,29130,"ZELIFF, William H., Jr.",NH,4,1,200,1.828511414,0.438,0,0,0,1,64
102,10,29131,"SWETT, Richard",NH,4,2,100,-1.10587385,-0.144,0,0,0,0,61
102,10,29132,"ANDREWS, Robert Ernest",NJ,12,1,100,-0.714596407,-0.297,0,0,0,0,52
102,10,29133,"ZIMMER, Richard",NJ,12,12,200,1.132122479,0.27,0,0,0,0,62
102,10,29134,"SERRANO, Jos̩ E.",NY,13,18,100,-3.908440289,-0.488,0,0,0,1,12
102,10,29135,"TAYLOR, Charles Hart",NC,47,11,200,1.820832083,0.488,0,0,0,0,59
102,10,29136,"HOBSON, David Lee",OH,24,7,200,1.354838253,0.315,0,0,0,1,64
102,10,29137,"BOEHNER, John Andrew",OH,24,8,200,2.576730021,0.513,0,0,0,1,69
102,10,29138,"BREWSTER, William K.",OK,53,3,100,-0.734164703,-0.08,0,0,0,1,50
102,10,29139,"KOPETSKI, Michael J.",OR,72,5,100,-1.727179066,-0.589,0,0,0,0,50
102,10,29140,"BLACKWELL, Lucien Edward",PA,14,2,100,-3.494579667,-0.538,0,0,0,1,8
102,10,29140,"BLACKWELL, Lucien Edward",PA,14,2,100,-3.494579667,-0.538,0,0,0,1,8
102,10,29141,"SANTORUM, Richard John (Rick)",PA,14,18,200,1.120245026,0.338,0,0,0,0,53
102,10,29142,"REED, John F. (Jack)",RI,5,2,100,-2.60022675,-0.39,0,0,0,1,46
102,10,29143,"JOHNSON, Sam",TX,49,3,200,2.991414176,0.608,0,0,0,1,74
102,10,29143,"JOHNSON, Sam",TX,49,3,200,2.991414176,0.608,0,0,0,1,74
102,10,29145,"WASHINGTON, Craig Anthony",TX,49,18,100,-3.896670069,-0.766,0,0,0,0,25
102,10,29146,"ORTON, William",UT,67,3,100,-0.85124593,-0.086,0,0,0,0,69
102,10,29147,"SANDERS, Bernard",VT,6,1,328,-2.901998546,-0.511,0,0,0,0,51
102,10,29148,"ALLEN, George",VA,40,7,200,2.249061976,0.409,0,0,0,0,66
102,10,29148,"ALLEN, George",VA,40,7,200,2.249061976,0.409,0,0,0,0,66
102,10,29149,"MORAN, James P.",VA,40,8,100,-1.693592112,-0.302,0,0,0,0,60
102,10,29150,"KLUG, Scott L.",WI,25,2,200,0.831737005,0.258,0,0,0,0,44
102,10,95120,"JONES, Ben",GA,44,4,100,-1.320997179,-0.213,0,0,0,0,59
103,11,1077,"BROOKS, Jack Bascom",TX,49,9,100,-0.983542466,-0.407,0,0,0,1,36
103,11,2605,"DINGELL, John David, Jr.",MI,23,16,100,-1.513315025,-0.448,0,0,0,1,36
103,11,6455,"MICHEL, Robert Henry",IL,21,18,200,1.414565113,0.372,0,0,0,1,41
103,11,6845,"NATCHER, William Huston",KY,51,2,100,-1.575076314,-0.288,0,0,0,1,45
103,11,6845,"NATCHER, William Huston",KY,51,2,100,-1.575076314,-0.288,0,0,0,1,45
103,11,8080,"ROSTENKOWSKI, Daniel David",IL,21,5,100,-2.324473803,-0.39,0,0,0,1,33
103,11,8672,"SMITH, Neal Edward",IA,31,4,100,-0.924952339,-0.313,0,0,0,1,39
103,11,10075,"WHITTEN, Jamie Lloyd",MS,46,1,100,-0.632486243,-0.161,0,0,0,0,50
103,11,10421,"YATES, Sidney Richard",IL,21,9,100,-3.285388148,-0.494,0,0,0,1,27
103,11,10520,"GONŹLEZ, Henry B.",TX,49,20,100,-2.06231796,-0.538,0,0,0,0,34
103,11,10573,"BROWN, George Edward, Jr.",CA,71,42,100,-3.380118152,-0.506,0,0,0,1,32
103,11,10583,"EDWARDS, William Donlon (Don)",CA,71,16,100,-3.204427508,-0.599,0,1,0,1,27
103,11,10588,"GIBBONS, Sam Melville",FL,43,11,100,-1.859679813,-0.233,0,0,0,1,39
103,11,10607,"McDADE, Joseph Michael",PA,14,10,200,0.936077616,0.093,0,0,0,0,41
103,11,10614,"PICKLE, James Jarrell (Jake)",TX,49,10,100,-0.789642601,-0.218,0,0,0,1,32
103,11,10616,"QUILLEN, James Henry",TN,54,1,200,1.547846212,0.246,0,0,0,1,51
103,11,10713,"CONYERS, John, Jr.",MI,23,14,100,-2.544967839,-0.658,0,0,0,1,15
103,11,10716,"de la GARZA, Eligio, II (Kika)",TX,49,15,100,-0.934338526,-0.255,0,0,0,1,34
103,11,10726,"FOLEY, Thomas Stephen",WA,73,5,100,-2.663186725,-0.354,0,0,0,0,36
103,11,10727,"FORD, William David",MI,23,13,100,-2.921024989,-0.516,0,0,0,1,34
103,11,10732,"HAMILTON, Lee Herbert",IN,22,9,100,-1.272944525,-0.171,0,1,0,0,40
103,11,10742,"JACOBS, Andrew, Jr.",IN,22,10,100,-0.057429576,-0.07,0,0,0,1,36
103,11,10757,"MINK, Patsy Takemoto",HI,82,2,100,-2.918863456,-0.513,0,0,1,0,34
103,11,11000,"BEVILL, Tom",AL,41,4,100,-0.776020184,-0.213,0,0,0,1,44
103,11,11035,"MONTGOMERY, Gillespie V. (Sonny)",MS,46,3,100,-0.746057938,0.017,1,0,0,1,58
103,11,11036,"MYERS, John Thomas",IN,22,7,200,1.961712816,0.236,0,0,0,1,46
103,11,12009,"CLAY, William Lacy, Sr.",MO,34,1,100,-4.716675511,-0.49,0,0,0,1,19
103,11,12013,"FISH, Hamilton, Jr.",NY,13,19,200,0.395103876,0.07,0,0,0,1,42
103,11,12030,"STOKES, Louis",OH,24,11,100,-4.51060938,-0.578,0,0,0,1,16
103,11,12036,"OBEY, David Ross",WI,25,7,100,-2.425285765,-0.45,0,0,0,0,33
103,11,12041,"CRANE, Philip Miller",IL,21,8,200,2.653807125,0.739,0,0,0,1,47
103,11,13002,"ARCHER, William Reynolds, Jr.",TX,49,7,200,3.341888326,0.496,0,0,0,1,57
103,11,13011,"DELLUMS, Ronald V.",CA,71,9,100,-5.367526036,-0.644,1,0,0,1,12
103,11,13024,"MAZZOLI, Romano Louis",KY,51,3,100,-0.47881637,-0.186,0,0,0,1,37
103,11,13035,"RANGEL, Charles B.",NY,13,15,100,-2.784537411,-0.514,0,0,0,1,11
103,11,13042,"SPENCE, Floyd Davidson",SC,48,2,200,2.834039032,0.32,1,0,0,1,52
103,11,13047,"YOUNG, Charles William (Bill)",FL,43,10,200,2.25453256,0.325,0,0,0,1,36
103,11,14015,"GILMAN, Benjamin Arthur",NY,13,20,200,0.590038385,0.043,0,1,0,1,41
103,11,14039,"MOAKLEY, John Joseph",MA,3,9,100,-2.558700245,-0.418,0,0,0,1,31
103,11,14040,"MOORHEAD, Carlos John",CA,71,27,200,3.316259096,0.465,0,0,0,1,36
103,11,14045,"REGULA, Ralph Straus",OH,24,16,200,1.320271931,0.221,0,0,0,1,39
103,11,14048,"ROSE, Charles Grandison, III",NC,47,7,100,-1.491072088,-0.319,0,0,0,0,43
103,11,14051,"SCHROEDER, Patricia Scott",CO,62,1,100,-1.415134384,-0.225,1,0,1,0,26
103,11,14052,"SHUSTER, E. G. (Bud)",PA,14,9,200,2.836036458,0.416,0,0,0,1,48
103,11,14053,"STARK, Fortney Hillman (Pete), Jr.",CA,71,13,100,-2.942527159,-0.631,0,0,0,1,25
103,11,14055,"STUDDS, Gerry Eastman",MA,3,10,100,-3.620777513,-0.444,0,0,0,0,32
103,11,14058,"THORNTON, Raymond Hoyt (Ray), Jr.",AR,42,2,100,-1.30550803,-0.306,0,0,0,1,36
103,11,14062,"WILSON, Charles",TX,49,2,100,-0.881070999,-0.196,0,0,0,1,35
103,11,14066,"YOUNG, Donald Edwin",AK,81,1,200,1.953184532,0.278,0,0,0,1,40
103,11,14068,"COLLINS, Cardiss",IL,21,7,100,-3.251291826,-0.552,0,0,1,0,15
103,11,14072,"MURTHA, John Patrick, Jr.",PA,14,12,100,-1.048977232,-0.265,0,0,0,1,33
103,11,14210,"CARR, Milton Robert (Bob)",MI,23,8,100,-1.283942832,-0.254,0,0,0,0,36
103,11,14212,"DERRICK, Butler Carson, Jr.",SC,48,3,100,-1.320957853,-0.215,0,0,0,0,51
103,11,14219,"ENGLISH, Glenn Lee, Jr.",OK,53,6,100,-0.751095448,-0.027,0,0,0,0,43
103,11,14219,"ENGLISH, Glenn Lee, Jr.",OK,53,6,100,-0.751095448,-0.027,0,0,0,0,43
103,11,14224,"FORD, Harold Eugene",TN,54,9,100,-2.154053363,-0.438,0,0,0,0,30
103,11,14233,"HEFNER, Willie Gathrel (Bill)",NC,47,8,100,-1.165411626,-0.264,0,0,0,0,44
103,11,14238,"HUGHES, William John",NJ,12,2,100,-1.066193863,-0.153,0,0,0,0,39
103,11,14239,"HYDE, Henry John",IL,21,6,200,1.712086519,0.312,0,1,0,1,47
103,11,14248,"LaFALCE, John Joseph",NY,13,29,100,-2.076961054,-0.357,0,0,0,1,33
103,11,14251,"LLOYD, Marilyn Laird",TN,54,3,100,-0.294434744,-0.058,1,0,1,0,44
103,11,14256,"MILLER, George",CA,71,7,100,-2.975477514,-0.552,0,0,0,0,22
103,11,14257,"MINETA, Norman Y.",CA,71,15,100,-2.48354481,-0.479,0,0,0,1,30
103,11,14262,"NEAL, Stephen Lybrook",NC,47,5,100,-0.935679504,-0.145,0,0,0,0,43
103,11,14265,"OBERSTAR, James Louis",MN,33,8,100,-2.814795474,-0.553,0,1,0,0,28
103,11,14274,"SHARP, Philip Riley",IN,22,2,100,-1.786073609,-0.166,0,0,0,0,43
103,11,14280,"WAXMAN, Henry Arnold",CA,71,29,100,-2.475637227,-0.473,0,0,0,0,20
103,11,14288,"GOODLING, William Franklin",PA,14,19,200,1.51055989,0.336,0,1,0,1,47
103,11,14402,"APPLEGATE, Douglas Earl",OH,24,18,100,-0.232466279,-0.106,0,0,0,0,34
103,11,14405,"BEILENSON, Anthony Charles",CA,71,24,100,-1.999677582,-0.44,0,0,0,0,30
103,11,14407,"BONIOR, David Edward",MI,23,10,100,-3.351967653,-0.547,0,0,0,1,41
103,11,14413,"DICKS, Norman DeValois",WA,73,6,100,-1.331141861,-0.312,0,0,0,0,31
103,11,14414,"DORNAN, Robert Kenneth",CA,71,46,200,2.589935494,0.49,1,0,0,1,40
103,11,14421,"GEPHARDT, Richard Andrew",MO,34,3,100,-2.496951925,-0.416,0,0,0,1,32
103,11,14422,"GLICKMAN, Daniel Robert",KS,32,4,100,-1.242458246,-0.133,0,0,0,0,40
103,11,14430,"KILDEE, Dale Edward",MI,23,9,100,-1.318832919,-0.385,0,0,0,0,35
103,11,14432,"LEACH, James Albert Smith",IA,31,1,200,0.13754283,0.141,0,1,0,0,34
103,11,14435,"MARKEY, Edward John",MA,3,7,100,-4.063927942,-0.5,0,0,0,1,29
103,11,14441,"MURPHY, Austin John",PA,14,20,100,-0.680124224,-0.081,0,0,0,1,29
103,11,14448,"RAHALL, Nick Joe, II",WV,56,3,100,-0.377242718,-0.306,0,0,0,0,32
103,11,14451,"SKELTON, Isaac Newton, IV (Ike)",MO,34,4,100,-0.729387234,-0.172,1,0,0,0,38
103,11,14454,"STUMP, Robert Lee",AZ,61,3,200,5.692323709,0.703,1,0,0,1,40
103,11,14458,"VENTO, Bruce Frank",MN,33,4,100,-3.224625536,-0.472,0,0,0,0,28
103,11,14459,"VOLKMER, Harold Lee",MO,34,9,100,-0.731666639,-0.196,0,0,0,1,34
103,11,14461,"WALKER, Robert Smith",PA,14,16,200,3.124586232,0.581,0,0,0,1,48
103,11,14469,"LIVINGSTON, Robert Linlithgow, Jr.",LA,45,1,200,1.154030131,0.326,0,0,0,1,56
103,11,14605,"BEREUTER, Douglas Kent",NE,35,1,200,0.66544056,0.231,0,1,0,1,43
103,11,14612,"CLINGER, William Floyd, Jr.",PA,14,5,200,1.316397021,0.176,0,0,0,1,41
103,11,14620,"DIXON, Julian Carey",CA,71,32,100,-2.426088195,-0.458,0,0,0,1,13
103,11,14624,"FAZIO, Victor Herbert, Jr.",CA,71,3,100,-1.770228695,-0.455,0,0,0,0,37
103,11,14626,"FROST, Jonas Martin",TX,49,24,100,-0.918774308,-0.316,0,0,0,1,33
103,11,14627,"GINGRICH, Newton Leroy",GA,44,6,200,1.451445858,0.377,0,0,0,0,55
103,11,14632,"HALL, Tony Patrick",OH,24,3,100,-1.625354282,-0.28,0,0,0,0,40
103,11,14636,"HUTTO, Earl Dewitt",FL,43,1,100,-0.293878938,-0.007,1,0,0,1,51
103,11,14644,"LEWIS, Charles Jeremy (Jerry)",CA,71,40,200,0.995304225,0.348,0,0,0,0,39
103,11,14649,"MATSUI, Robert T.",CA,71,5,100,-2.542925138,-0.404,0,0,0,0,31
103,11,14655,"ROTH, Toby A.",WI,25,8,200,0.840194087,0.351,0,1,0,1,40
103,11,14656,"SABO, Martin Olav",MN,33,5,100,-3.441364316,-0.516,0,0,0,0,23
103,11,14657,"SENSENBRENNER, Frank James, Jr.",WI,25,9,200,1.058460875,0.646,0,0,0,0,48
103,11,14661,"SNOWE, Olympia Jean",ME,2,2,200,0.787733811,0.091,0,1,1,0,29
103,11,14662,"SOLOMON, Gerald Brooks Hunt",NY,13,22,200,3.923168113,0.492,0,0,0,1,41
103,11,14664,"STENHOLM, Charles Walter",TX,49,17,100,-0.311711789,0.019,0,0,0,0,40
103,11,14666,"SWIFT, Allan Byron",WA,73,2,100,-2.202339889,-0.43,0,0,0,0,33
103,11,14667,"SYNAR, Michael Lynn",OK,53,2,100,-3.995603001,-0.321,0,0,0,0,36
103,11,14669,"THOMAS, William Marshall",CA,71,21,200,1.282348771,0.371,0,0,0,0,46
103,11,14672,"WILLIAMS, John Patrick",MT,64,1,100,-1.130972198,-0.315,0,0,0,1,35
103,11,14675,"PETRI, Thomas Evert",WI,25,6,200,0.946610829,0.379,0,0,0,0,41
103,11,14677,"PORTER, John Edward",IL,21,10,200,0.336602223,0.217,0,0,0,1,43
103,11,14679,"TAUZIN, Wilbert Joseph (Billy)",LA,45,3,100,-0.051908354,0.03,0,0,0,0,40
103,11,14802,"BLILEY, Thomas Jerome, Jr.",VA,40,7,200,1.485344504,0.382,0,0,0,1,54
103,11,14808,"COYNE, William Joseph",PA,14,14,100,-4.029185144,-0.494,0,0,0,1,26
103,11,14813,"DREIER, David Timothy",CA,71,28,200,2.44126467,0.478,0,0,0,0,41
103,11,14819,"EMERSON, Norvell William (Bill)",MO,34,8,200,1.503343841,0.332,0,0,0,1,37
103,11,14822,"FIELDS, Jack Milton, Jr.",TX,49,8,200,4.010185563,0.541,0,0,0,0,55
103,11,14823,"FOGLIETTA, Thomas Michael",PA,14,1,100,-3.547501311,-0.506,0,0,0,0,19
103,11,14824,"FRANK, Barney",MA,3,4,100,-3.668237301,-0.499,0,0,0,0,26
103,11,14825,"GEJDENSON, Samuel",CT,1,2,100,-2.534458243,-0.416,0,1,0,0,30
103,11,14827,"GUNDERSON, Steven Craig",WI,25,3,200,0.728106644,0.203,0,0,0,0,33
103,11,14828,"HALL, Ralph Moody",TX,49,4,100,-0.014507425,0.096,0,0,0,1,41
103,11,14829,"HANSEN, James Vear",UT,67,1,200,3.693596608,0.496,1,0,0,1,47
103,11,14835,"HUNTER, Duncan Lee",CA,71,52,200,2.614217804,0.47,1,0,0,1,37
103,11,14837,"LANTOS, Thomas Peter",CA,71,12,100,-1.624093888,-0.376,0,1,0,0,27
103,11,14842,"McCOLLUM, Ira William, Jr. (Bill)",FL,43,8,200,2.104770396,0.377,0,0,0,1,48
103,11,14843,"McCURDY, David Keith",OK,53,4,100,-0.574982457,-0.112,1,0,0,0,42
103,11,14852,"ROBERTS, Charles Patrick (Pat)",KS,32,1,200,2.315790549,0.415,0,0,0,1,42
103,11,14854,"ROGERS, Harold Dallas (Hal)",KY,51,5,200,2.235084831,0.331,0,0,0,1,42
103,11,14855,"ROUKEMA, Margaret Scafati",NJ,12,5,200,0.51109668,0.162,0,0,1,0,49
103,11,14858,"SCHUMER, Charles Ellis (Chuck)",NY,13,9,100,-2.042839667,-0.35,0,1,0,0,32
103,11,14860,"SHAW, Eugene Clay, Jr.",FL,43,22,200,1.98701745,0.3,0,0,0,0,38
103,11,14861,"SKEEN, Joseph Richard",NM,66,2,200,1.38808461,0.301,0,0,0,1,40
103,11,14863,"SMITH, Christopher Henry",NJ,12,4,200,0.846014394,0.158,0,1,0,0,41
103,11,14869,"WOLF, Frank Rudolph",VA,40,10,200,1.293297369,0.284,0,0,0,1,50
103,11,14871,"WYDEN, Ronald Lee",OR,72,3,100,-2.021155947,-0.314,0,0,0,0,26
103,11,14873,"HOYER, Steny Hamilton",MD,52,5,100,-1.332757397,-0.379,0,0,0,0,39
103,11,14875,"OXLEY, Michael Garver",OH,24,4,200,1.944879477,0.382,0,0,0,0,46
103,11,14877,"KENNELLY, Barbara Bailey",CT,1,1,100,-1.771179469,-0.346,0,0,1,0,31
103,11,14879,"MART̍NEZ, Matthew G.",CA,71,31,100,-1.540828164,-0.341,0,1,0,1,32
103,11,15000,"ACKERMAN, Gary Leonard",NY,13,5,100,-1.785867407,-0.429,0,1,0,0,35
103,11,15001,"ANDREWS, Michael Allen",TX,49,25,100,-0.726876431,-0.135,0,0,0,0,36
103,11,15003,"BATEMAN, Herbert Harvell",VA,40,1,200,1.09280041,0.242,1,0,0,1,49
103,11,15005,"BERMAN, Howard Lawrence",CA,71,26,100,-2.754419014,-0.404,0,1,0,0,24
103,11,15006,"BILIRAKIS, Michael",FL,43,9,200,1.528696909,0.382,0,0,0,1,41
103,11,15007,"BOEHLERT, Sherwood Louis",NY,13,23,200,0.514485976,0.103,0,0,0,1,40
103,11,15008,"BORSKI, Robert Anthony, Jr.",PA,14,3,100,-1.655446054,-0.416,0,1,0,0,31
103,11,15010,"BOUCHER, Frederick C.",VA,40,9,100,-1.240867478,-0.265,0,0,0,0,42
103,11,15013,"BRYANT, John Wiley",TX,49,5,100,-1.955382939,-0.358,0,0,0,0,34
103,11,15014,"BURTON, Danny Lee",IN,22,6,200,3.33868482,0.585,0,1,0,1,57
103,11,15018,"COLEMAN, Ronald D'Emory",TX,49,16,100,-1.58118116,-0.402,0,0,0,1,35
103,11,15019,"COOPER, James Hayes Shofner",TN,54,4,100,-0.044023779,-0.162,0,0,0,0,40
103,11,15021,"DURBIN, Richard Joseph",IL,21,20,100,-2.046863674,-0.365,0,0,0,0,34
103,11,15023,"EVANS, Lane Allen",IL,21,17,100,-2.502850278,-0.454,1,0,0,1,36
103,11,15026,"GEKAS, George William",PA,14,17,200,2.68421879,0.426,0,0,0,1,50
103,11,15028,"JOHNSON, Nancy Lee",CT,1,6,200,0.312705908,0.122,0,0,1,0,36
103,11,15029,"KAPTUR, Marcia Carolyn (Marcy)",OH,24,9,100,-0.881995226,-0.349,0,0,1,0,32
103,11,15030,"KASICH, John Richard",OH,24,12,200,1.03343337,0.314,1,0,0,0,41
103,11,15032,"LEHMAN, Richard Henry",CA,71,19,100,-1.093980765,-0.27,0,0,0,0,43
103,11,15033,"LEVIN, Sander Martin",MI,23,12,100,-1.990601768,-0.377,0,0,0,0,40
103,11,15035,"LEWIS, Thomas F.",FL,43,16,200,3.759538383,0.387,0,0,0,1,39
103,11,15036,"LIPINSKI, William Oliver",IL,21,3,100,-0.534377084,-0.176,0,0,0,1,39
103,11,15040,"McCANDLESS, Alfred A.",CA,71,44,200,1.877577744,0.474,0,0,0,1,36
103,11,15041,"McCLOSKEY, Francis Xavier",IN,22,8,100,-2.05753229,-0.336,1,1,0,1,40
103,11,15049,"ORTIZ, Solomon P.",TX,49,27,100,-0.903974907,-0.272,1,0,0,1,36
103,11,15050,"OWENS, Major Robert Odell",NY,13,11,100,-3.756788446,-0.569,0,0,0,0,10
103,11,15051,"PACKARD, Ronald C.",CA,71,48,200,3.845494452,0.419,0,0,0,1,44
103,11,15052,"PENNY, Timothy Joseph",MN,33,1,100,-1.470406668,-0.051,0,0,0,0,34
103,11,15055,"RICHARDSON, Bill",NM,66,3,100,-1.605250358,-0.321,0,0,0,0,34
103,11,15056,"RIDGE, Thomas Joseph",PA,14,21,200,0.892058989,0.186,0,0,0,1,34
103,11,15057,"ROWLAND, James Roy, Jr.",GA,44,8,100,-0.541564843,-0.127,0,0,0,1,45
103,11,15058,"SCHAEFER, Daniel",CO,62,6,200,2.644065713,0.479,0,0,0,1,38
103,11,15060,"SISISKY, Norman",VA,40,4,100,-0.76128438,-0.122,1,0,0,1,46
103,11,15061,"SLATTERY, James Charles",KS,32,2,100,-0.620709906,-0.099,0,0,0,0,36
103,11,15063,"SMITH, Robert Freeman",OR,72,2,200,3.491589278,0.396,0,0,0,0,38
103,11,15064,"SPRATT, John McKee, Jr.",SC,48,5,100,-1.063405031,-0.256,1,0,0,1,45
103,11,15066,"SUNDQUIST, Donald Kenneth",TN,54,7,200,1.974262974,0.371,0,0,0,1,50
103,11,15070,"TORRES, Esteban Edward",CA,71,34,100,-2.481816503,-0.487,0,0,0,1,31
103,11,15071,"TORRICELLI, Robert Guy",NJ,12,9,100,-0.919405011,-0.262,0,1,0,0,40
103,11,15072,"TOWNS, Edolphus",NY,13,10,100,-3.92238586,-0.519,0,0,0,1,13
103,11,15073,"VALENTINE, Itimous Thaddeus, Jr., (Tim)",NC,47,2,100,-0.568529623,-0.084,0,0,0,1,45
103,11,15075,"VUCANOVICH, Barbara Farrell",NV,65,2,200,1.956450822,0.441,0,0,1,0,38
103,11,15076,"WHEAT, Alan Dupree",MO,34,5,100,-3.144031482,-0.465,0,0,0,0,26
103,11,15077,"WISE, Robert Ellsworth, Jr.",WV,56,2,100,-1.404916559,-0.32,0,0,0,0,39
103,11,15081,"DARDEN, George (Buddy)",GA,44,7,100,-0.722128183,-0.161,0,0,0,0,46
103,11,15082,"KLECZKA, Gerald Daniel",WI,25,4,100,-1.55715038,-0.322,0,0,0,1,38
103,11,15083,"MOLLOHAN, Alan Bowlby",WV,56,1,100,-0.987880902,-0.292,0,0,0,1,35
103,11,15085,"BARTON, Joe Linus",TX,49,6,200,1.877287572,0.528,0,0,0,0,46
103,11,15086,"BENTLEY, Helen Delich",MD,52,2,200,1.32240764,0.276,0,0,1,0,44
103,11,15090,"CALLAHAN, Herbert Leon (Sonny)",AL,41,1,200,1.502840078,0.373,0,0,0,1,51
103,11,15092,"COBLE, Howard",NC,47,6,200,1.523194252,0.52,0,0,0,1,51
103,11,15093,"COMBEST, Larry Ed",TX,49,19,200,3.116997616,0.458,0,0,0,0,60
103,11,15094,"DeLAY, Thomas Dale",TX,49,22,200,3.30914016,0.593,0,0,0,0,51
103,11,15098,"FAWELL, Harris W.",IL,21,13,200,1.292664112,0.332,0,0,0,0,47
103,11,15099,"GALLO, Dean Anderson",NJ,12,11,200,1.118345419,0.203,0,0,0,0,51
103,11,15100,"GORDON, Barton Jennings",TN,54,6,100,-1.145805052,-0.204,0,0,0,1,40
103,11,15104,"KANJORSKI, Paul E.",PA,14,11,100,-1.486674159,-0.303,0,0,0,1,38
103,11,15105,"KOLBE, James Thomas",AZ,61,5,200,0.881457114,0.351,0,0,0,1,37
103,11,15106,"LIGHTFOOT, James Ross",IA,31,3,200,1.187030767,0.391,0,0,0,1,36
103,11,15107,"MANTON, Thomas J.",NY,13,7,100,-1.308605304,-0.361,0,0,0,1,35
103,11,15108,"McMILLAN, John Alexander, III (Alex)",NC,47,9,200,1.015546707,0.294,0,0,0,1,52
103,11,15109,"MEYERS, Jan",KS,32,3,200,1.10692327,0.208,0,1,1,0,37
103,11,15112,"SAXTON, Hugh James",NJ,12,3,200,1.372944976,0.238,1,0,0,0,40
103,11,15121,"TRAFICANT, James A., Jr.",OH,24,17,100,-0.331294804,-0.082,0,0,0,0,26
103,11,15124,"VISCLOSKY, Peter",IN,22,1,100,-1.26329422,-0.402,0,0,0,0,31
103,11,15125,"ARMEY, Richard Keith",TX,49,26,200,3.321670004,0.635,0,0,0,0,47
103,11,15129,"CHAPMAN, Jim",TX,49,1,100,-0.525061644,-0.198,0,0,0,0,38
103,11,15245,"ABERCROMBIE, Neil",HI,82,1,100,-3.409348606,-0.432,1,0,0,0,39
103,11,15401,"BAKER, Richard Hugh",LA,45,6,200,2.685822005,0.423,0,0,0,0,50
103,11,15402,"BALLENGER, Cass",NC,47,10,200,1.464107425,0.464,0,1,0,1,53
103,11,15403,"BILBRAY, James Hubert",NV,65,1,100,-0.667746629,-0.184,1,0,0,0,31
103,11,15406,"BUNNING, James Paul David",KY,51,4,200,2.813511564,0.521,0,0,0,0,44
103,11,15408,"CARDIN, Benjamin Louis",MD,52,3,100,-1.800601763,-0.329,0,0,0,0,32
103,11,15410,"DeFAZIO, Peter Anthony",OR,72,4,100,-1.327870101,-0.428,0,0,0,1,32
103,11,15412,"FLAKE, Floyd Harold",NY,13,6,100,-3.078946522,-0.455,0,0,0,0,18
103,11,15413,"GALLEGLY, Elton W.",CA,71,23,200,2.589819656,0.402,0,1,0,0,34
103,11,15414,"GRANDY, Frederick Lawrence",IA,31,5,200,0.517166144,0.283,0,0,0,0,42
103,11,15417,"HASTERT, John Dennis",IL,21,14,200,2.550747132,0.443,0,0,0,0,44
103,11,15418,"HAYES, James Allison",LA,45,7,100,-0.26346073,-0.057,0,0,0,0,38
103,11,15419,"HEFLEY, Joel M.",CO,62,5,200,3.406727413,0.591,1,0,0,0,49
103,11,15420,"HERGER, Walter William (Wally)",CA,71,2,200,3.457715994,0.551,0,0,0,0,38
103,11,15421,"HOCHBRUECKNER, George Joseph",NY,13,1,100,-1.295641987,-0.348,1,0,0,1,40
103,11,15423,"HOUGHTON, Amory, Jr.",NY,13,31,200,0.556888202,0.154,0,0,0,1,40
103,11,15424,"INHOFE, James Mountain",OK,53,1,200,3.252146014,0.551,1,0,0,0,49
103,11,15425,"JOHNSON, Timothy Peter (Tim)",SD,37,1,100,-0.888312591,-0.25,0,0,0,0,41
103,11,15427,"KENNEDY, Joseph Patrick, II",MA,3,8,100,-2.755957836,-0.413,0,0,0,0,19
103,11,15429,"KYL, Jon Llewellyn",AZ,61,4,200,2.510039151,0.548,1,0,0,0,43
103,11,15430,"LANCASTER, H. Martin",NC,47,3,100,-0.732289295,-0.134,1,0,0,1,47
103,11,15431,"LEWIS, John R.",GA,44,5,100,-4.435458246,-0.588,0,0,0,0,25
103,11,15433,"MFUME, Kweisi",MD,52,7,100,-3.137358009,-0.446,0,0,0,0,16
103,11,15434,"MORELLA, Constance A.",MD,52,8,200,0.129028524,-0.018,0,0,1,0,35
103,11,15437,"PICKETT, Owen Bradford",VA,40,2,100,-0.7111008,-0.149,1,0,0,0,48
103,11,15438,"PRICE, David Eugene",NC,47,4,100,-1.74986273,-0.339,0,0,0,0,39
103,11,15439,"RAVENEL, Arthur, Jr.",SC,48,1,200,1.265950783,0.162,1,0,0,1,53
103,11,15442,"SAWYER, Thomas Charles",OH,24,14,100,-2.348088555,-0.377,0,1,0,0,31
103,11,15443,"SKAGGS, David Evans",CO,62,2,100,-2.086622144,-0.355,0,0,0,1,30
103,11,15444,"SLAUGHTER, Louise McIntosh",NY,13,28,100,-1.995904719,-0.464,0,0,1,0,38
103,11,15445,"SMITH, Lamar Seeligson",TX,49,21,200,2.723393916,0.423,0,0,0,0,52
103,11,15446,"UPTON, Frederick Stephen",MI,23,6,200,0.522842201,0.339,0,0,0,0,38
103,11,15447,"WELDON, Wayne Curtis (Curt)",PA,14,7,200,1.739863258,0.232,1,0,0,0,43
103,11,15448,"PELOSI, Nancy",CA,71,8,100,-4.092525844,-0.493,0,0,1,0,16
103,11,15449,"SHAYS, Christopher H.",CT,1,4,200,0.396507863,0.129,0,0,0,0,42
103,11,15450,"CLEMENT, Robert Nelson",TN,54,5,100,-0.833272596,-0.216,0,0,0,1,37
103,11,15451,"McCRERY, James O., III",LA,45,5,200,0.89272631,0.362,0,0,0,0,48
103,11,15452,"PAYNE, Lewis Franklin, Jr.",VA,40,5,100,-0.980483391,-0.148,0,0,0,1,46
103,11,15453,"COSTELLO, Jerry Francis",IL,21,12,100,-0.558671811,-0.317,0,0,0,0,28
103,11,15454,"PALLONE, Frank, Jr.",NJ,12,6,100,-1.387212576,-0.398,0,0,0,0,39
103,11,15455,"DUNCAN, John J., Jr.",TN,54,2,200,1.039706154,0.598,0,0,0,1,48
103,11,15601,"COX, Charles Christopher",CA,71,47,200,2.590556753,0.54,0,0,0,0,46
103,11,15603,"ENGEL, Eliot Lance",NY,13,17,100,-3.35310569,-0.407,0,1,0,0,19
103,11,15604,"GILLMOR, Paul Eugene",OH,24,5,200,1.347369268,0.254,0,0,0,1,41
103,11,15605,"GOSS, Porter J.",FL,43,14,200,2.994323304,0.421,0,0,0,1,46
103,11,15605,"GOSS, Porter J.",FL,43,14,200,2.994323304,0.421,0,0,0,1,46
103,11,15606,"HANCOCK, Melton D. (Mel)",MO,34,7,200,3.598501235,0.79,0,0,0,1,45
103,11,15607,"HOAGLAND, Peter J.",NE,35,2,100,-0.902776736,-0.209,0,0,0,1,47
103,11,15609,"JOHNSTON, Harry A., II",FL,43,19,100,-2.170839356,-0.372,0,1,0,1,30
103,11,15611,"LAUGHLIN, Gregory H.",TX,49,14,100,-0.705011524,-0.097,0,0,0,1,41
103,11,15612,"LOWEY, Nita M.",NY,13,18,100,-2.532323538,-0.389,0,0,1,0,40
103,11,15613,"McDERMOTT, James A.",WA,73,7,100,-4.026599807,-0.666,0,0,0,1,18
103,11,15614,"McNULTY, Michael Robert",NY,13,21,100,-0.442427834,-0.369,0,0,0,0,34
103,11,15615,"MACHTLEY, Ronald K.",RI,5,1,200,1.005778599,0.113,1,0,0,1,28
103,11,15616,"NEAL, Richard Edmund",MA,3,2,100,-2.618834819,-0.416,0,0,0,0,29
103,11,15617,"PARKER, Michael (Mike)",MS,46,4,100,-0.449859699,0.034,0,0,0,0,50
103,11,15618,"PAXON, L. William",NY,13,27,200,2.397086605,0.472,0,0,0,0,42
103,11,15619,"PAYNE, Donald Milford",NJ,12,10,100,-5.435340921,-0.592,0,1,0,0,20
103,11,15620,"POSHARD, Glenn",IL,21,19,100,-0.63783765,-0.211,0,0,0,1,34
103,11,15621,"ROHRABACHER, Dana",CA,71,45,200,1.612593402,0.628,0,1,0,0,42
103,11,15622,"SANGMEISTER, George Edward",IL,21,11,100,-1.301684328,-0.226,0,0,0,1,36
103,11,15623,"SARPALIUS, William",TX,49,13,100,-0.613343345,-0.078,0,0,0,0,43
103,11,15624,"SCHIFF, Steven Harvey",NM,66,1,200,1.074771125,0.196,0,0,0,1,38
103,11,15627,"STEARNS, Clifford Bundy",FL,43,6,200,2.724499199,0.554,0,0,0,1,47
103,11,15628,"TANNER, John S.",TN,54,8,100,-0.474044373,-0.182,1,0,0,1,42
103,11,15629,"UNSOELD, Jolene",WA,73,3,100,-4.24820134,-0.52,0,0,1,0,33
103,11,15630,"WALSH, James T.",NY,13,25,200,1.250615022,0.208,0,0,0,0,36
103,11,15631,"LONG, Jill Lynette",IN,22,4,100,-1.654155907,-0.224,0,0,1,0,46
103,11,15632,"BROWDER, John Glen",AL,41,3,100,-0.741018517,-0.165,1,0,0,0,47
103,11,15633,"THOMAS, Craig Lyle",WY,68,1,200,2.164741218,0.446,0,0,0,0,40
103,11,15634,"ROS-LEHTINEN, Ileana",FL,43,18,200,0.649480433,0.245,0,1,1,0,57
103,11,15635,"CONDIT, Gary Adrian",CA,71,18,100,-0.300450693,-0.103,0,0,0,0,37
103,11,15636,"GEREN, Preston M. (Pete)",TX,49,12,100,-0.478786323,-0.032,1,0,0,0,35
103,11,15637,"TAYLOR, Gary Eugene (Gene)",MS,46,5,100,0.00258864,-0.045,1,0,0,1,54
103,11,15639,"MOLINARI, Susan",NY,13,13,200,1.371376234,0.256,0,0,1,0,48
103,11,29100,"CRAMER, Robert E. (Bud), Jr.",AL,41,5,100,-0.749401822,-0.132,0,0,0,1,44
103,11,29101,"PASTOR, Ed",AZ,61,2,100,-2.329578506,-0.421,0,0,0,0,28
103,11,29104,"DOOLITTLE, John Taylor",CA,71,4,200,3.92166996,0.519,0,0,0,0,40
103,11,29105,"DOOLEY, Calvin M.",CA,71,20,100,-1.775820083,-0.19,0,0,0,0,37
103,11,29106,"WATERS, Maxine",CA,71,35,100,-3.696390233,-0.66,0,0,1,0,13
103,11,29107,"CUNNINGHAM, Randall (Duke)",CA,71,51,200,2.47394633,0.411,1,0,0,1,40
103,11,29108,"ALLARD, A. Wayne",CO,62,4,200,1.571786418,0.572,0,0,0,0,38
103,11,29109,"DeLAURO, Rosa L.",CT,1,3,100,-2.035449777,-0.418,0,0,1,0,35
103,11,29110,"FRANKS, Gary A.",CT,1,5,200,1.815349034,0.273,0,0,0,0,42
103,11,29111,"PETERSON, Douglas Brian (Pete)",FL,43,2,100,-1.168885748,-0.261,0,0,0,1,38
103,11,29112,"BACCHUS, James",FL,43,15,100,-1.338648783,-0.236,0,0,0,0,43
103,11,29114,"LaROCCO, Larry",ID,63,1,100,-1.136903638,-0.243,0,0,0,1,41
103,11,29115,"EWING, Thomas W.",IL,21,15,200,2.399551951,0.361,0,0,0,1,39
103,11,29117,"ROEMER, Timothy John",IN,22,3,100,-1.383091259,-0.165,0,0,0,0,42
103,11,29118,"NUSSLE, James Allen",IA,31,2,200,0.858319945,0.417,0,0,0,0,35
103,11,29120,"JEFFERSON, William Jennings",LA,45,2,100,-2.514157222,-0.424,0,0,0,1,25
103,11,29121,"ANDREWS, Thomas Hiram",ME,2,1,100,-3.948879835,-0.398,1,0,0,0,32
103,11,29122,"GILCHREST, Wayne Thomas",MD,52,1,200,0.481743903,0.204,0,0,0,1,44
103,11,29123,"OLVER, John Walter",MA,3,1,100,-3.694881382,-0.577,0,0,0,0,26
103,11,29124,"CAMP, David Lee",MI,23,4,200,1.2028654,0.385,0,0,0,0,37
103,11,29125,"COLLINS, Barbara-Rose",MI,23,15,100,-2.998396936,-0.648,0,0,1,0,13
103,11,29126,"RAMSTAD, James (Jim)",MN,33,3,200,1.291532792,0.316,0,0,0,1,36
103,11,29127,"PETERSON, Collin Clark",MN,33,7,100,-0.673985448,-0.145,0,0,0,1,38
103,11,29129,"BARRETT, William E.",NE,35,3,200,1.73632416,0.379,0,0,0,1,49
103,11,29130,"ZELIFF, William H., Jr.",NH,4,1,200,2.306503262,0.438,0,0,0,1,39
103,11,29131,"SWETT, Richard",NH,4,2,100,-0.925397325,-0.144,0,0,0,0,37
103,11,29132,"ANDREWS, Robert Ernest",NJ,12,1,100,-0.195380201,-0.297,0,1,0,0,32
103,11,29133,"ZIMMER, Richard",NJ,12,12,200,1.223454874,0.27,0,0,0,0,43
103,11,29134,"SERRANO, Jos̩ E.",NY,13,16,100,-3.439527493,-0.488,0,0,0,1,15
103,11,29135,"TAYLOR, Charles Hart",NC,47,11,200,2.160659801,0.488,0,0,0,0,43
103,11,29136,"HOBSON, David Lee",OH,24,7,200,1.183051712,0.315,0,0,0,1,45
103,11,29137,"BOEHNER, John Andrew",OH,24,8,200,2.476904252,0.513,0,0,0,1,47
103,11,29138,"BREWSTER, William K.",OK,53,3,100,-0.590205549,-0.08,0,0,0,1,34
103,11,29139,"KOPETSKI, Michael J.",OR,72,5,100,-2.810922436,-0.589,0,0,0,0,35
103,11,29140,"BLACKWELL, Lucien Edward",PA,14,2,100,-3.791822707,-0.538,0,0,0,1,14
103,11,29141,"SANTORUM, Richard John (Rick)",PA,14,18,200,0.939448265,0.338,0,0,0,0,30
103,11,29142,"REED, John F. (Jack)",RI,5,2,100,-2.259499225,-0.39,0,0,0,1,30
103,11,29143,"JOHNSON, Sam",TX,49,3,200,3.133051352,0.608,0,0,0,1,48
103,11,29145,"WASHINGTON, Craig Anthony",TX,49,18,100,-2.431160988,-0.766,0,0,0,0,22
103,11,29146,"ORTON, William",UT,67,3,100,-0.389458882,-0.086,0,0,0,0,46
103,11,29147,"SANDERS, Bernard",VT,6,1,328,-2.011203906,-0.511,0,0,0,0,30
103,11,29149,"MORAN, James P.",VA,40,8,100,-1.819011956,-0.302,0,0,0,0,37
103,11,29150,"KLUG, Scott L.",WI,25,2,200,0.705147215,0.258,0,0,0,0,32
103,11,29300,"EVERETT, Robert Terry",AL,41,2,200,1.483235517,0.414,1,0,0,1,53
103,11,29301,"BACHUS, Spencer T., III",AL,41,6,200,1.740136626,0.387,0,0,0,1,64
103,11,29302,"HILLIARD, Earl Frederick",AL,41,7,100,-2.602985561,-0.555,0,0,0,0,26
103,11,29303,"COPPERSMITH, Samuel G.",AZ,61,1,100,-1.354006148,-0.238,0,0,0,0,40
103,11,29304,"ENGLISH, Karan",AZ,61,6,100,-2.262088165,-0.298,0,0,1,0,38
103,11,29305,"LINCOLN, Blanche Lambert",AR,42,1,100,-1.069965921,-0.166,0,0,1,0,32
103,11,29306,"HUTCHINSON, Timothy",AR,42,3,200,1.76864971,0.419,0,0,0,0,42
103,11,29307,"DICKEY, Jay W., Jr.",AR,42,4,200,0.887376149,0.391,0,0,0,0,31
103,11,29308,"HAMBURG, Daniel",CA,71,1,100,-2.361859218,-0.555,0,0,0,0,29
103,11,29309,"WOOLSEY, Lynn C.",CA,71,6,100,-2.965169688,-0.556,0,0,1,0,24
103,11,29310,"BAKER, William P.",CA,71,10,200,3.394663474,0.533,0,0,0,1,35
103,11,29311,"POMBO, Richard William",CA,71,11,200,3.144406047,0.461,0,0,0,0,38
103,11,29312,"ESHOO, Anna Georges",CA,71,14,100,-2.067885961,-0.383,0,0,1,0,26
103,11,29314,"HUFFINGTON, Michael",CA,71,22,200,1.693909063,0.332,0,0,0,0,35
103,11,29315,"McKEON, Howard P. (Buck)",CA,71,25,200,2.633387504,0.396,0,0,0,0,39
103,11,29316,"BECERRA, Xavier",CA,71,30,100,-3.648856338,-0.512,0,0,0,0,24
103,11,29317,"ROYBAL-ALLARD, Lucille",CA,71,33,100,-3.37545177,-0.47,0,0,1,0,23
103,11,29318,"HARMAN, Jane L.",CA,71,36,100,-1.116761869,-0.262,1,0,1,0,35
103,11,29319,"TUCKER, Walter R., III",CA,71,37,100,-2.242963325,-0.479,0,0,0,0,16
103,11,29320,"HORN, John Stephen (Steve)",CA,71,38,200,0.437385678,0.167,0,0,0,1,33
103,11,29321,"ROYCE, Edward Randall",CA,71,39,200,1.312207698,0.666,0,1,0,0,44
103,11,29322,"KIM, Jay C.",CA,71,41,200,2.082361228,0.39,0,0,0,0,42
103,11,29323,"CALVERT, Ken",CA,71,43,200,1.444241333,0.347,0,0,0,0,38
103,11,29324,"SCHENK, Lynn",CA,71,49,100,-1.262405653,-0.256,0,0,1,0,31
103,11,29325,"FILNER, Bob",CA,71,50,100,-1.737151876,-0.652,0,0,0,0,30
103,11,29326,"McINNIS, Scott",CO,62,3,200,1.670441729,0.391,0,0,0,0,34
103,11,29327,"CASTLE, Michael Newbold",DE,11,1,200,1.00779737,0.229,0,0,0,0,35
103,11,29328,"BROWN, Corrine",FL,43,3,100,-1.978037758,-0.429,0,0,1,0,30
103,11,29329,"FOWLER, Tillie Kidd",FL,43,4,200,1.240060662,0.329,1,0,1,0,53
103,11,29330,"THURMAN, Karen L.",FL,43,5,100,-1.038059955,-0.304,0,0,1,0,34
103,11,29331,"MICA, John L.",FL,43,7,200,1.702133697,0.453,0,0,0,0,45
103,11,29332,"CANADY, Charles Terrance",FL,43,12,200,2.718205229,0.382,0,0,0,0,45
103,11,29333,"MILLER, Daniel",FL,43,13,200,1.732864368,0.453,0,0,0,0,43
103,11,29334,"MEEK, Carrie P.",FL,43,17,100,-1.917117196,-0.483,0,0,1,0,19
103,11,29335,"DEUTSCH, Peter R.",FL,43,20,100,-1.49100965,-0.324,0,1,0,0,33
103,11,29336,"DIAZ-BALART, Lincoln",FL,43,21,200,0.534327837,0.243,0,1,0,0,58
103,11,29337,"HASTINGS, Alcee Lamar",FL,43,23,100,-2.513066279,-0.564,0,1,0,0,23
103,11,29338,"KINGSTON, Jack",GA,44,1,200,2.036749874,0.54,0,0,0,0,47
103,11,29339,"BISHOP, Sanford Dixon, Jr.",GA,44,2,100,-1.529449497,-0.279,0,0,0,1,29
103,11,29340,"COLLINS, Michael Allen (Mac)",GA,44,3,200,2.360509628,0.536,0,0,0,1,48
103,11,29341,"LINDER, John Elmer",GA,44,4,200,2.562577609,0.559,0,0,0,1,46
103,11,29342,"DEAL, John Nathan",GA,44,9,100,-0.304074491,-0.036,0,0,0,1,49
103,11,29343,"JOHNSON, Clete Donald, Jr. (Don)",GA,44,10,100,-0.8261056,-0.168,1,0,0,1,47
103,11,29344,"McKINNEY, Cynthia Ann",GA,44,11,100,-3.906488718,-0.533,0,1,1,0,24
103,11,29345,"CRAPO, Michael Dean",ID,63,2,200,3.060021284,0.507,0,0,0,0,43
103,11,29346,"RUSH, Bobby L.",IL,21,1,100,-3.776781339,-0.479,0,0,0,1,12
103,11,29347,"REYNOLDS, Mel",IL,21,2,100,-2.376118035,-0.489,0,0,0,1,13
103,11,29348,"GUTI��RREZ, Luis V.",IL,21,4,100,-2.752356083,-0.483,0,1,0,0,23
103,11,29349,"MANZULLO, Donald A.",IL,21,16,200,1.423836999,0.51,0,1,0,0,42
103,11,29350,"BUYER, Stephen Earle",IN,22,5,200,2.39415403,0.435,1,0,0,1,45
103,11,29351,"BARLOW, Thomas J., III",KY,51,1,100,-1.39247249,-0.316,0,0,0,0,38
103,11,29352,"LEWIS, Ron",KY,51,2,200,2.184451163,0.418,0,0,0,1,45
103,11,29352,"LEWIS, Ron",KY,51,2,200,2.184451163,0.418,0,0,0,1,45
103,11,29353,"BAESLER, Henry Scott (Scotty)",KY,51,6,100,-0.753955112,-0.155,0,0,0,1,42
103,11,29354,"FIELDS, Cleo",LA,45,4,100,-2.591926807,-0.461,0,0,0,0,25
103,11,29355,"WYNN, Albert Russell",MD,52,4,100,-2.860769268,-0.38,0,1,0,0,19
103,11,29356,"BARTLETT, Roscoe Gardner",MD,52,6,200,2.84548923,0.493,1,0,0,0,48
103,11,29357,"BLUTE, Peter I.",MA,3,3,200,1.0267944,0.192,0,0,0,0,31
103,11,29358,"MEEHAN, Martin Thomas",MA,3,5,100,-2.100903385,-0.39,1,0,0,0,32
103,11,29359,"TORKILDSEN, Peter Gerard",MA,3,6,200,0.77752822,0.155,1,0,0,0,31
103,11,29360,"STUPAK, Bart T.",MI,23,1,100,-1.087130936,-0.396,1,0,0,0,35
103,11,29361,"HOEKSTRA, Peter",MI,23,2,200,1.157491106,0.516,0,0,0,0,45
103,11,29363,"BARCIA, James A.",MI,23,5,100,-0.485741517,-0.184,0,0,0,0,32
103,11,29364,"SMITH, Nick H.",MI,23,7,200,1.595720467,0.505,0,0,0,1,37
103,11,29364,"SMITH, Nick H.",MI,23,7,200,1.595720467,0.505,0,0,0,1,37
103,11,29365,"KNOLLENBERG, Joseph",MI,23,11,200,1.764495761,0.366,0,0,0,1,47
103,11,29366,"MINGE, David R.",MN,33,2,100,-1.169167755,-0.213,0,0,0,0,35
103,11,29367,"GRAMS, Rod",MN,33,6,200,2.381069047,0.506,0,0,0,0,33
103,11,29369,"TALENT, James Matthes",MO,34,2,200,0.880710111,0.364,1,0,0,0,40
103,11,29370,"DANNER, Patsy Ann (Pat)",MO,34,6,100,-0.771195758,-0.186,0,0,1,0,32
103,11,29371,"FRANKS, Robert Douglas",NJ,12,7,200,0.949440106,0.259,0,0,0,0,44
103,11,29372,"KLEIN, Herbert C.",NJ,12,8,100,-1.335313701,-0.286,0,0,0,1,42
103,11,29373,"MENENDEZ, Robert",NJ,12,13,100,-1.419335536,-0.36,0,1,0,0,36
103,11,29374,"LAZIO, Enrico A. (Rick)",NY,13,2,200,0.888027871,0.216,0,0,0,0,40
103,11,29375,"KING, Peter T.",NY,13,3,200,1.716171371,0.261,0,0,0,1,42
103,11,29376,"LEVY, David A.",NY,13,4,200,1.828003147,0.347,0,1,0,0,41
103,11,29377,"NADLER, Jerrold Lewis",NY,13,8,100,-2.439576516,-0.509,0,0,0,0,17
103,11,29378,"VEĹZQUEZ, Nydia M.",NY,13,12,100,-3.484288071,-0.545,0,0,1,0,26
103,11,29379,"MALONEY, Carolyn Bosher",NY,13,14,100,-1.357306162,-0.385,0,0,1,0,23
103,11,29380,"HINCHEY, Maurice Dunlea",NY,13,26,100,-3.123934633,-0.575,0,0,0,1,35
103,11,29381,"QUINN, John Francis (Jack)",NY,13,30,200,0.97659999,0.198,0,0,0,0,26
103,11,29382,"CLAYTON, Eva M.",NC,47,1,100,-2.904772505,-0.459,0,0,1,0,29
103,11,29383,"WATT, Melvin L.",NC,47,12,100,-4.537940195,-0.526,0,0,0,0,25
103,11,29384,"POMEROY, Earl Ralph, III",ND,36,1,100,-1.043236958,-0.266,0,0,0,0,44
103,11,29385,"MANN, David Scott",OH,24,1,100,-1.460408104,-0.216,1,0,0,1,43
103,11,29388,"HOKE, Martin R.",OH,24,10,200,1.58607546,0.338,0,0,0,0,36
103,11,29389,"BROWN, Sherrod",OH,24,13,100,-1.732959318,-0.439,0,1,0,0,35
103,11,29390,"PRYCE, Deborah D.",OH,24,15,200,1.554440605,0.32,0,0,1,0,45
103,11,29391,"FINGERHUT, Eric D.",OH,24,19,100,-1.096727019,-0.191,0,1,0,0,37
103,11,29392,"ISTOOK, Ernest James, Jr.",OK,53,5,200,1.533374369,0.492,0,0,0,0,51
103,11,29393,"LUCAS, Frank D.",OK,53,6,200,1.913173108,0.362,0,0,0,0,43
103,11,29393,"LUCAS, Frank D.",OK,53,6,200,1.913173108,0.362,0,0,0,0,43
103,11,29394,"FURSE, Elizabeth",OR,72,1,100,-2.857194335,-0.457,1,0,1,0,32
103,11,29395,"KLINK, Ronald",PA,14,4,100,-0.864758618,-0.31,0,0,0,0,31
103,11,29396,"HOLDEN, Thomas Timothy (Tim)",PA,14,6,100,-0.732875439,-0.233,1,0,0,0,41
103,11,29397,"GREENWOOD, James Charles",PA,14,8,200,0.926111818,0.225,0,0,0,0,38
103,11,29398,"MARGOLIES-MEZVINSKY, Marjorie",PA,14,13,100,-1.090699878,-0.223,0,0,1,1,39
103,11,29399,"McHALE, Paul F., Jr.",PA,14,15,100,-0.953432863,-0.242,1,0,0,1,37
103,11,29747,"STRICKLAND, Ted",OH,24,6,100,-1.908562939,-0.384,0,0,0,0,40
103,11,29937,"INSLEE, Jay Robert",WA,73,4,100,-1.416307985,-0.33,0,0,0,0,42
103,11,39300,"INGLIS, Robert Durden",SC,48,4,200,3.286369239,0.518,0,0,0,0,54
103,11,39301,"CLYBURN, James Enos",SC,48,6,100,-2.013136228,-0.464,0,0,0,0,31
103,11,39302,"BONILLA, Henry",TX,49,23,200,1.921121466,0.4,0,0,0,0,41
103,11,39303,"TEJEDA, Frank",TX,49,28,100,-0.985027203,-0.277,1,0,0,1,30
103,11,39304,"GREEN, Raymond Eugene (Gene)",TX,49,29,100,-0.947246059,-0.321,0,0,0,0,30
103,11,39305,"JOHNSON, Eddie Bernice",TX,49,30,100,-2.023488151,-0.486,0,0,1,0,21
103,11,39306,"SHEPHERD, Karen",UT,67,2,100,-1.36883508,-0.246,0,0,1,0,38
103,11,39307,"SCOTT, Robert C.",VA,40,3,100,-1.88045397,-0.454,0,0,0,1,25
103,11,39308,"GOODLATTE, Robert William",VA,40,6,200,1.467721534,0.492,0,0,0,0,49
103,11,39309,"BYRNE, Leslie Larkin",VA,40,11,100,-1.235684249,-0.259,0,0,1,0,43
103,11,39310,"CANTWELL, Maria E.",WA,73,1,100,-1.599937759,-0.287,0,1,1,0,32
103,11,39312,"DUNN, Jennifer Blackburn",WA,73,8,200,1.426113786,0.384,0,0,1,0,34
103,11,39313,"KREIDLER, Myron Bradford (Mike)",WA,73,9,100,-2.124987157,-0.294,0,0,0,0,31
103,11,39315,"BARRETT, Thomas M.",WI,25,5,100,-1.381698441,-0.38,0,0,0,0,30
103,11,39316,"McHUGH, John Michael",NY,13,24,200,2.194719267,0.225,1,0,0,0,38
104,12,2605,"DINGELL, John David, Jr.",MI,23,16,100,-1.623826539,-0.448,0,0,0,1,36
104,12,10421,"YATES, Sidney Richard",IL,21,9,100,-3.418031385,-0.494,0,0,0,1,27
104,12,10520,"GONŹLEZ, Henry B.",TX,49,20,100,-1.343004282,-0.538,0,0,0,0,34
104,12,10573,"BROWN, George Edward, Jr.",CA,71,42,100,-2.770214666,-0.506,0,0,0,1,32
104,12,10588,"GIBBONS, Sam Melville",FL,43,11,100,-1.531122,-0.233,0,0,0,1,39
104,12,10607,"McDADE, Joseph Michael",PA,14,10,200,0.946280347,0.093,0,0,0,0,41
104,12,10616,"QUILLEN, James Henry",TN,54,1,200,2.262320502,0.246,0,0,0,1,51
104,12,10713,"CONYERS, John, Jr.",MI,23,14,100,-5.034983084,-0.658,0,0,0,1,15
104,12,10716,"de la GARZA, Eligio, II (Kika)",TX,49,15,100,-0.813167774,-0.255,0,0,0,1,34
104,12,10732,"HAMILTON, Lee Herbert",IN,22,9,100,-1.004039178,-0.171,0,1,0,0,40
104,12,10742,"JACOBS, Andrew, Jr.",IN,22,10,100,-0.664178281,-0.07,0,0,0,1,36
104,12,10757,"MINK, Patsy Takemoto",HI,82,2,100,-2.40219106,-0.513,0,0,1,0,34
104,12,11000,"BEVILL, Tom",AL,41,4,100,-0.488156158,-0.213,0,0,0,1,44
104,12,11035,"MONTGOMERY, Gillespie V. (Sonny)",MS,46,3,100,-0.184990185,0.017,1,0,0,1,58
104,12,11036,"MYERS, John Thomas",IN,22,7,200,2.38358426,0.236,0,0,0,1,46
104,12,12009,"CLAY, William Lacy, Sr.",MO,34,1,100,-4.140492679,-0.49,0,0,0,1,19
104,12,12030,"STOKES, Louis",OH,24,11,100,-3.340289697,-0.578,0,0,0,1,16
104,12,12036,"OBEY, David Ross",WI,25,7,100,-2.249366665,-0.45,0,0,0,0,33
104,12,12041,"CRANE, Philip Miller",IL,21,8,200,2.663810069,0.739,0,0,0,1,47
104,12,13002,"ARCHER, William Reynolds, Jr.",TX,49,7,200,2.623862525,0.496,0,0,0,1,57
104,12,13011,"DELLUMS, Ronald V.",CA,71,9,100,-4.520099739,-0.644,1,0,0,1,12
104,12,13035,"RANGEL, Charles B.",NY,13,15,100,-3.872208668,-0.514,0,0,0,1,11
104,12,13042,"SPENCE, Floyd Davidson",SC,48,2,200,2.38170474,0.32,1,0,0,1,52
104,12,13047,"YOUNG, Charles William (Bill)",FL,43,10,200,2.011673309,0.325,0,0,0,1,36
104,12,14015,"GILMAN, Benjamin Arthur",NY,13,20,200,0.727867185,0.043,0,1,0,1,41
104,12,14039,"MOAKLEY, John Joseph",MA,3,9,100,-2.517842319,-0.418,0,0,0,1,31
104,12,14040,"MOORHEAD, Carlos John",CA,71,27,200,2.826847022,0.465,0,0,0,1,36
104,12,14045,"REGULA, Ralph Straus",OH,24,16,200,1.044089055,0.221,0,0,0,1,39
104,12,14048,"ROSE, Charles Grandison, III",NC,47,7,100,-1.251119982,-0.319,0,1,0,0,43
104,12,14051,"SCHROEDER, Patricia Scott",CO,62,1,100,-2.968262973,-0.225,1,0,1,0,26
104,12,14052,"SHUSTER, E. G. (Bud)",PA,14,9,200,2.130414083,0.416,0,0,0,1,48
104,12,14053,"STARK, Fortney Hillman (Pete), Jr.",CA,71,13,100,-3.467072157,-0.631,0,0,0,1,25
104,12,14055,"STUDDS, Gerry Eastman",MA,3,10,100,-4.494019819,-0.444,0,0,0,0,32
104,12,14058,"THORNTON, Raymond Hoyt (Ray), Jr.",AR,42,2,100,-1.521022728,-0.306,0,0,0,1,36
104,12,14062,"WILSON, Charles",TX,49,2,100,-0.516070901,-0.196,0,0,0,1,35
104,12,14066,"YOUNG, Donald Edwin",AK,81,1,200,1.769976383,0.278,0,0,0,1,40
104,12,14068,"COLLINS, Cardiss",IL,21,7,100,-3.859483682,-0.552,0,0,1,0,15
104,12,14072,"MURTHA, John Patrick, Jr.",PA,14,12,100,-0.508685219,-0.265,0,0,0,1,33
104,12,14224,"FORD, Harold Eugene",TN,54,9,100,-1.824078304,-0.438,0,0,0,0,30
104,12,14233,"HEFNER, Willie Gathrel (Bill)",NC,47,8,100,-1.260580153,-0.264,0,0,0,0,44
104,12,14239,"HYDE, Henry John",IL,21,6,200,2.195699673,0.312,0,1,0,1,47
104,12,14248,"LaFALCE, John Joseph",NY,13,29,100,-2.084802188,-0.357,0,0,0,1,33
104,12,14256,"MILLER, George",CA,71,7,100,-3.820690377,-0.552,0,0,0,0,22
104,12,14257,"MINETA, Norman Y.",CA,71,15,100,-2.405547911,-0.479,0,0,0,1,30
104,12,14257,"MINETA, Norman Y.",CA,71,15,100,-2.405547911,-0.479,0,0,0,1,30
104,12,14265,"OBERSTAR, James Louis",MN,33,8,100,-2.61387861,-0.553,0,0,0,0,28
104,12,14280,"WAXMAN, Henry Arnold",CA,71,29,100,-2.79178683,-0.473,0,0,0,0,20
104,12,14288,"GOODLING, William Franklin",PA,14,19,200,0.782687935,0.336,0,1,0,1,47
104,12,14405,"BEILENSON, Anthony Charles",CA,71,24,100,-2.767025148,-0.44,0,0,0,0,30
104,12,14407,"BONIOR, David Edward",MI,23,10,100,-2.98573989,-0.547,0,0,0,1,41
104,12,14413,"DICKS, Norman DeValois",WA,73,6,100,-1.147050107,-0.312,0,0,0,0,31
104,12,14414,"DORNAN, Robert Kenneth",CA,71,46,200,2.031432017,0.49,1,0,0,1,40
104,12,14421,"GEPHARDT, Richard Andrew",MO,34,3,100,-2.180055836,-0.416,0,0,0,1,32
104,12,14430,"KILDEE, Dale Edward",MI,23,9,100,-1.413062699,-0.385,0,0,0,0,35
104,12,14432,"LEACH, James Albert Smith",IA,31,1,200,0.043411019,0.141,0,1,0,0,34
104,12,14435,"MARKEY, Edward John",MA,3,7,100,-3.481178603,-0.5,0,0,0,1,29
104,12,14448,"RAHALL, Nick Joe, II",WV,56,3,100,-1.157619427,-0.306,0,0,0,0,32
104,12,14451,"SKELTON, Isaac Newton, IV (Ike)",MO,34,4,100,-0.290698096,-0.172,1,0,0,0,38
104,12,14454,"STUMP, Robert Lee",AZ,61,3,200,3.843767599,0.703,1,0,0,1,40
104,12,14458,"VENTO, Bruce Frank",MN,33,4,100,-3.262947388,-0.472,0,0,0,0,28
104,12,14459,"VOLKMER, Harold Lee",MO,34,9,100,-1.344273134,-0.196,0,0,0,1,34
104,12,14461,"WALKER, Robert Smith",PA,14,16,200,3.198810951,0.581,0,0,0,1,48
104,12,14469,"LIVINGSTON, Robert Linlithgow, Jr.",LA,45,1,200,1.695087354,0.326,0,0,0,1,56
104,12,14605,"BEREUTER, Douglas Kent",NE,35,1,200,0.648667061,0.231,0,1,0,1,43
104,12,14612,"CLINGER, William Floyd, Jr.",PA,14,5,200,1.233924138,0.176,0,0,0,1,41
104,12,14620,"DIXON, Julian Carey",CA,71,32,100,-1.849494935,-0.458,0,0,0,1,13
104,12,14624,"FAZIO, Victor Herbert, Jr.",CA,71,3,100,-1.543965185,-0.455,0,0,0,0,37
104,12,14626,"FROST, Jonas Martin",TX,49,24,100,-1.064849158,-0.316,0,0,0,1,33
104,12,14627,"GINGRICH, Newton Leroy",GA,44,6,200,2.638437924,0.377,0,0,0,0,55
104,12,14632,"HALL, Tony Patrick",OH,24,3,100,-1.239174678,-0.28,0,0,0,0,40
104,12,14644,"LEWIS, Charles Jeremy (Jerry)",CA,71,40,200,1.380274043,0.348,0,0,0,0,39
104,12,14649,"MATSUI, Robert T.",CA,71,5,100,-1.804068423,-0.404,0,0,0,0,31
104,12,14655,"ROTH, Toby A.",WI,25,8,200,0.728815204,0.351,0,1,0,1,40
104,12,14656,"SABO, Martin Olav",MN,33,5,100,-2.820845905,-0.516,0,0,0,0,23
104,12,14657,"SENSENBRENNER, Frank James, Jr.",WI,25,9,200,0.642683474,0.646,0,0,0,0,48
104,12,14662,"SOLOMON, Gerald Brooks Hunt",NY,13,22,200,3.351296262,0.492,0,0,0,1,41
104,12,14664,"STENHOLM, Charles Walter",TX,49,17,100,-0.398200919,0.019,0,0,0,0,40
104,12,14669,"THOMAS, William Marshall",CA,71,21,200,1.240628518,0.371,0,0,0,0,46
104,12,14672,"WILLIAMS, John Patrick",MT,64,1,100,-2.054481538,-0.315,0,0,0,1,35
104,12,14675,"PETRI, Thomas Evert",WI,25,6,200,0.365846271,0.379,0,0,0,0,41
104,12,14677,"PORTER, John Edward",IL,21,10,200,0.205697671,0.217,0,0,0,1,43
104,12,14679,"TAUZIN, Wilbert Joseph (Billy)",LA,45,3,100,0.117243033,0.03,0,0,0,0,40
104,12,14679,"TAUZIN, Wilbert Joseph (Billy)",LA,45,3,100,0.117243033,0.03,0,0,0,0,40
104,12,14802,"BLILEY, Thomas Jerome, Jr.",VA,40,7,200,1.622169021,0.382,0,0,0,1,54
104,12,14808,"COYNE, William Joseph",PA,14,14,100,-3.241407265,-0.494,0,0,0,1,26
104,12,14813,"DREIER, David Timothy",CA,71,28,200,2.544144487,0.478,0,0,0,0,41
104,12,14819,"EMERSON, Norvell William (Bill)",MO,34,8,200,1.860401494,0.332,0,0,0,1,37
104,12,14822,"FIELDS, Jack Milton, Jr.",TX,49,8,200,3.752560051,0.541,0,0,0,0,55
104,12,14823,"FOGLIETTA, Thomas Michael",PA,14,1,100,-3.121265581,-0.506,0,0,0,0,19
104,12,14824,"FRANK, Barney",MA,3,4,100,-3.287300677,-0.499,0,0,0,0,26
104,12,14825,"GEJDENSON, Samuel",CT,1,2,100,-1.627491101,-0.416,0,1,0,0,30
104,12,14827,"GUNDERSON, Steven Craig",WI,25,3,200,0.462567597,0.203,0,0,0,0,33
104,12,14828,"HALL, Ralph Moody",TX,49,4,100,0.344001858,0.096,0,0,0,1,41
104,12,14829,"HANSEN, James Vear",UT,67,1,200,2.526820655,0.496,1,0,0,1,47
104,12,14835,"HUNTER, Duncan Lee",CA,71,52,200,2.64548861,0.47,1,0,0,1,37
104,12,14837,"LANTOS, Thomas Peter",CA,71,12,100,-2.232837306,-0.376,0,1,0,0,27
104,12,14842,"McCOLLUM, Ira William, Jr. (Bill)",FL,43,8,200,2.137356351,0.377,0,0,0,1,48
104,12,14852,"ROBERTS, Charles Patrick (Pat)",KS,32,1,200,2.076284001,0.415,0,0,0,1,42
104,12,14854,"ROGERS, Harold Dallas (Hal)",KY,51,5,200,2.13399116,0.331,0,0,0,1,42
104,12,14855,"ROUKEMA, Margaret Scafati",NJ,12,5,200,0.270370313,0.162,0,0,1,0,49
104,12,14858,"SCHUMER, Charles Ellis (Chuck)",NY,13,9,100,-2.130106021,-0.35,0,0,0,0,32
104,12,14860,"SHAW, Eugene Clay, Jr.",FL,43,22,200,1.851398037,0.3,0,0,0,0,38
104,12,14861,"SKEEN, Joseph Richard",NM,66,2,200,1.892648651,0.301,0,0,0,1,40
104,12,14863,"SMITH, Christopher Henry",NJ,12,4,200,1.033108598,0.158,0,1,0,0,41
104,12,14869,"WOLF, Frank Rudolph",VA,40,10,200,0.748853637,0.284,0,0,0,1,50
104,12,14871,"WYDEN, Ronald Lee",OR,72,3,100,-2.123642446,-0.314,0,0,0,0,26
104,12,14871,"WYDEN, Ronald Lee",OR,72,3,100,-2.123642446,-0.314,0,0,0,0,26
104,12,14873,"HOYER, Steny Hamilton",MD,52,5,100,-1.266447544,-0.379,0,0,0,0,39
104,12,14875,"OXLEY, Michael Garver",OH,24,4,200,2.381638538,0.382,0,0,0,0,46
104,12,14877,"KENNELLY, Barbara Bailey",CT,1,1,100,-1.310936576,-0.346,0,0,1,0,31
104,12,14879,"MART̍NEZ, Matthew G.",CA,71,31,100,-0.877156077,-0.341,0,1,0,1,32
104,12,15000,"ACKERMAN, Gary Leonard",NY,13,5,100,-1.904317509,-0.429,0,1,0,0,35
104,12,15003,"BATEMAN, Herbert Harvell",VA,40,1,200,1.259075561,0.242,1,0,0,1,49
104,12,15005,"BERMAN, Howard Lawrence",CA,71,26,100,-2.088024021,-0.404,0,1,0,0,24
104,12,15006,"BILIRAKIS, Michael",FL,43,9,200,1.445447659,0.382,0,0,0,1,41
104,12,15007,"BOEHLERT, Sherwood Louis",NY,13,23,200,0.564684496,0.103,0,0,0,1,40
104,12,15008,"BORSKI, Robert Anthony, Jr.",PA,14,3,100,-1.749871347,-0.416,0,0,0,0,31
104,12,15010,"BOUCHER, Frederick C.",VA,40,9,100,-1.138898633,-0.265,0,0,0,0,42
104,12,15013,"BRYANT, John Wiley",TX,49,5,100,-2.035893223,-0.358,0,0,0,0,34
104,12,15014,"BURTON, Danny Lee",IN,22,6,200,3.276036417,0.585,0,1,0,1,57
104,12,15018,"COLEMAN, Ronald D'Emory",TX,49,16,100,-1.378862936,-0.402,0,0,0,1,35
104,12,15021,"DURBIN, Richard Joseph",IL,21,20,100,-2.069648969,-0.365,0,0,0,0,34
104,12,15023,"EVANS, Lane Allen",IL,21,17,100,-2.705864933,-0.454,1,0,0,1,36
104,12,15026,"GEKAS, George William",PA,14,17,200,2.090179138,0.426,0,0,0,1,50
104,12,15028,"JOHNSON, Nancy Lee",CT,1,6,200,0.551953084,0.122,0,0,1,0,36
104,12,15029,"KAPTUR, Marcia Carolyn (Marcy)",OH,24,9,100,-1.386152397,-0.349,0,0,1,0,32
104,12,15030,"KASICH, John Richard",OH,24,12,200,1.624882026,0.314,1,0,0,0,41
104,12,15033,"LEVIN, Sander Martin",MI,23,12,100,-1.749463007,-0.377,0,0,0,0,40
104,12,15036,"LIPINSKI, William Oliver",IL,21,3,100,-0.741834036,-0.176,0,0,0,1,39
104,12,15049,"ORTIZ, Solomon P.",TX,49,27,100,-0.71779978,-0.272,1,0,0,1,36
104,12,15050,"OWENS, Major Robert Odell",NY,13,11,100,-4.376137547,-0.569,0,0,0,0,10
104,12,15051,"PACKARD, Ronald C.",CA,71,48,200,2.650697973,0.419,0,0,0,1,44
104,12,15055,"RICHARDSON, Bill",NM,66,3,100,-1.253386632,-0.321,0,0,0,0,34
104,12,15058,"SCHAEFER, Daniel",CO,62,6,200,3.388755328,0.479,0,0,0,1,38
104,12,15060,"SISISKY, Norman",VA,40,4,100,-0.471940803,-0.122,1,0,0,1,46
104,12,15064,"SPRATT, John McKee, Jr.",SC,48,5,100,-1.051941172,-0.256,1,0,0,1,45
104,12,15070,"TORRES, Esteban Edward",CA,71,34,100,-2.467614614,-0.487,0,0,0,1,31
104,12,15071,"TORRICELLI, Robert Guy",NJ,12,9,100,-1.055726774,-0.262,0,1,0,0,40
104,12,15072,"TOWNS, Edolphus",NY,13,10,100,-3.999976241,-0.519,0,0,0,1,13
104,12,15075,"VUCANOVICH, Barbara Farrell",NV,65,2,200,1.788661955,0.441,0,0,1,0,38
104,12,15077,"WISE, Robert Ellsworth, Jr.",WV,56,2,100,-1.555248208,-0.32,0,0,0,0,39
104,12,15082,"KLECZKA, Gerald Daniel",WI,25,4,100,-1.645019587,-0.322,0,0,0,1,38
104,12,15083,"MOLLOHAN, Alan Bowlby",WV,56,1,100,-0.751065222,-0.292,0,0,0,1,35
[truncated: 382,555 more chars]
